# Supplementary material for: Population Genomics of Sub-Saharan Drosophila melanogaster: African Diversity and Non-African Admixture
Source: PubMed Central journal article supplement (PMC3527209; doi:10.1371/journal.pgen.1003080), 2012-12-20
Supplement: pgen.1003080.s004.pdf [file pgen.1003080.s004.pdf]

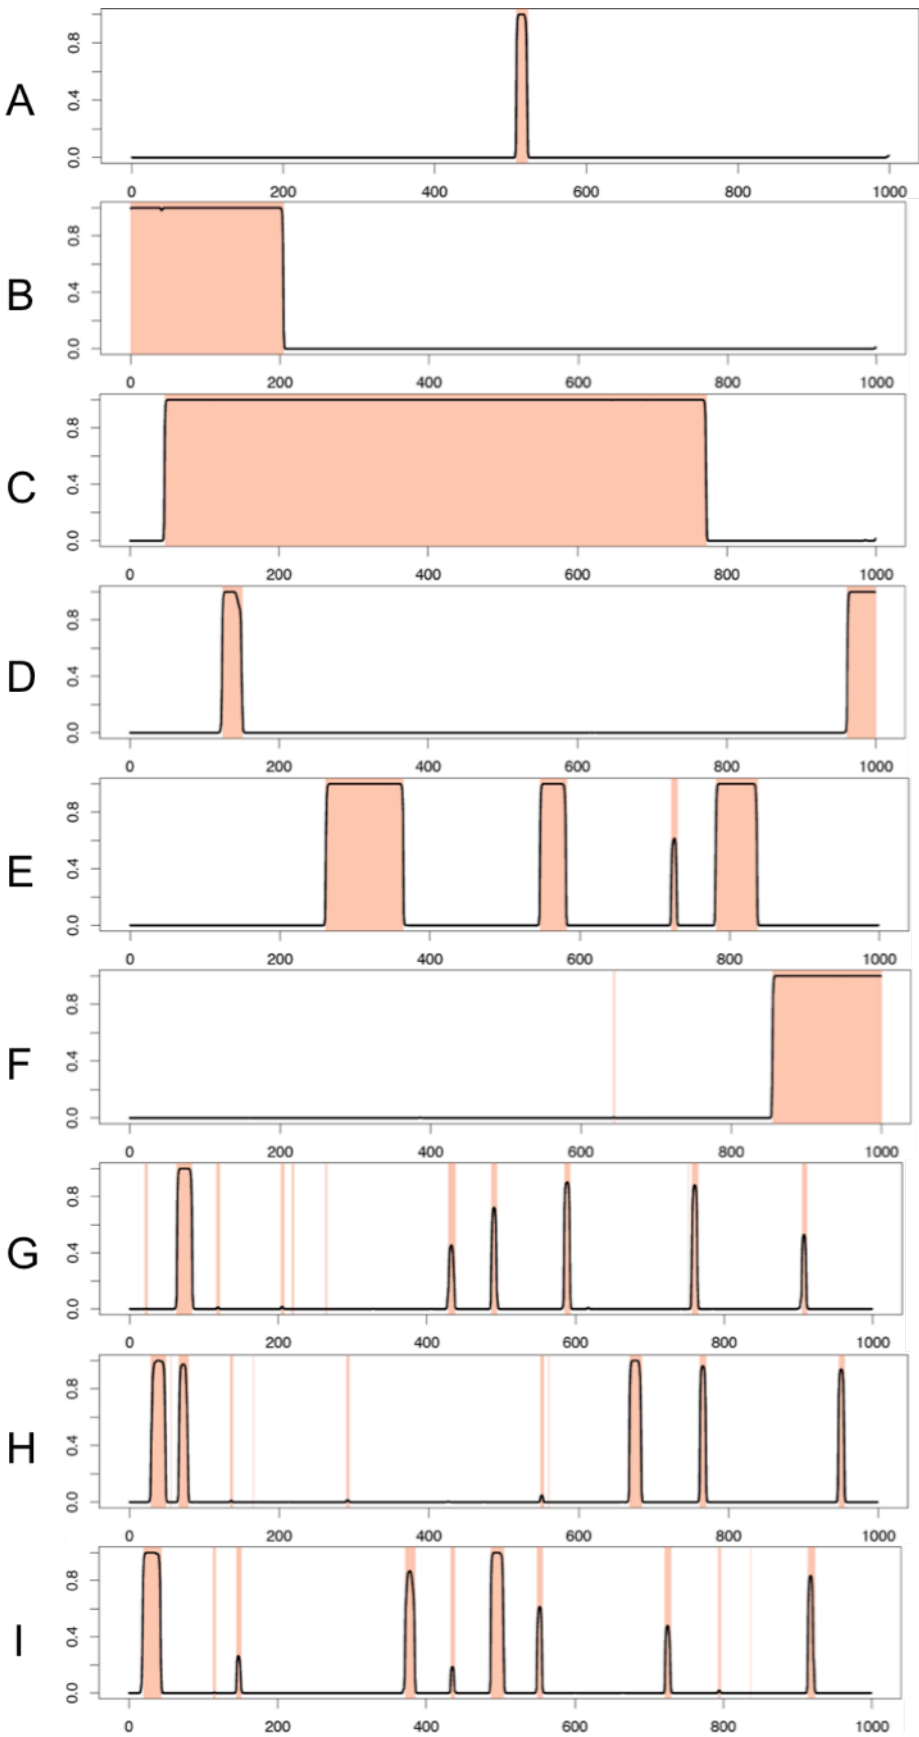

**Figure S4.** Performance of the admixture detection HMM method on simulated data. Each chart depicts the estimated admixture probability (Y axis) for each window along the chromosome (X axis), with true admixture tracts shaded. Shown here are representative simulation results for admixture beginning 100 generations ago (A-C), 1,000 generations ago (D-F), or 10,000 generations ago (G-I).
