# Supplementary material for: Population Genomics of Sub-Saharan Drosophila melanogaster: African Diversity and Non-African Admixture
Source: PubMed Central journal article supplement (PMC3527209; doi:10.1371/journal.pgen.1003080), 2012-12-20
Supplement: pgen.1003080.s006.pdf [file pgen.1003080.s006.pdf]

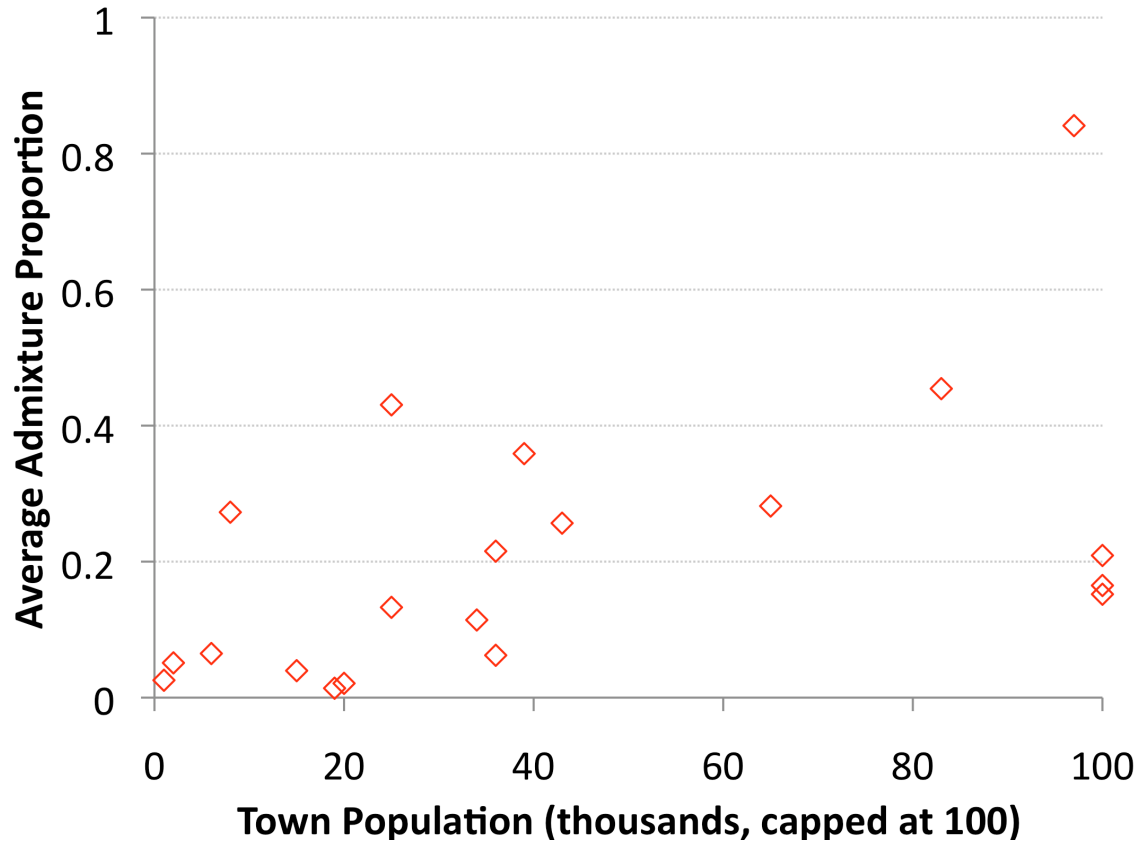

**Figure S6.** The relationship between inferred population admixture proportion and the human population size of the collection locality. Admixture proportion is the average level of non-African ancestry estimated for a population's genomes by the HMM method described in the text. A maximum population size of 100,000 was based on the assumption that flies in larger cities continue to occupy similarly uniform urban environments. The relationship was statistically significant (Spearman  $\rho = 0.60$ ; one-tailed  $P = 0.003$ ).
