# Supplementary material for: Population Genomics of Sub-Saharan Drosophila melanogaster: African Diversity and Non-African Admixture
Source: PubMed Central journal article supplement (PMC3527209; doi:10.1371/journal.pgen.1003080), 2012-12-20
Supplement: pgen.1003080.s007.pdf [file pgen.1003080.s007.pdf]

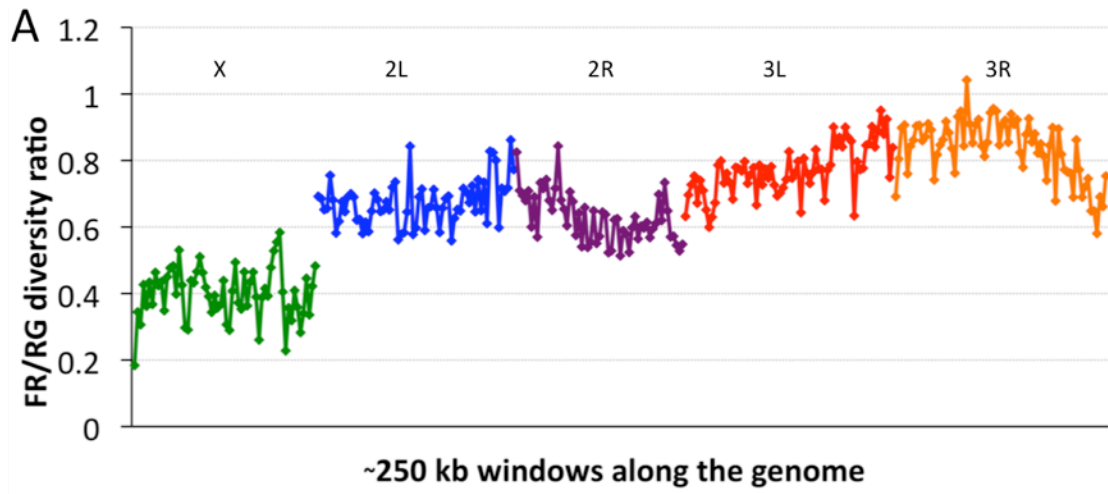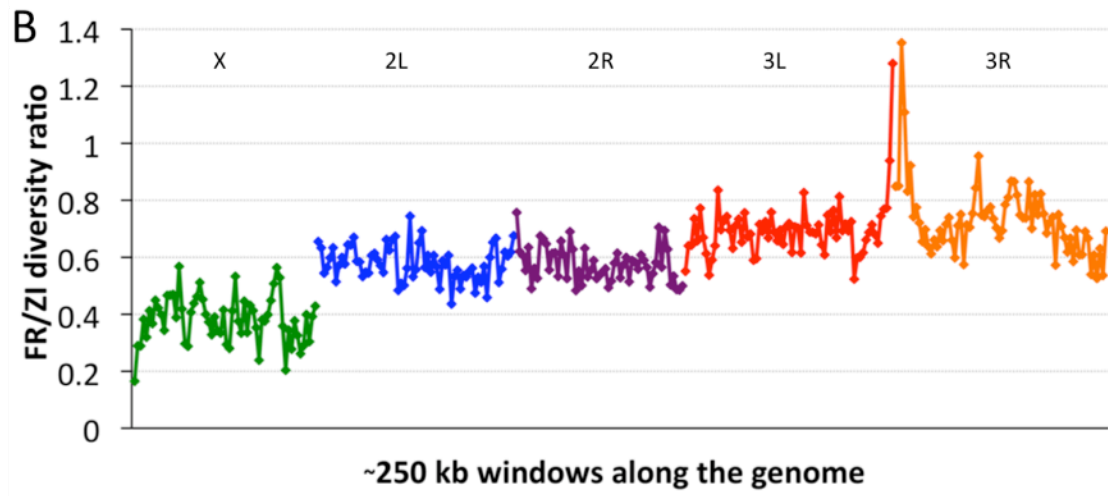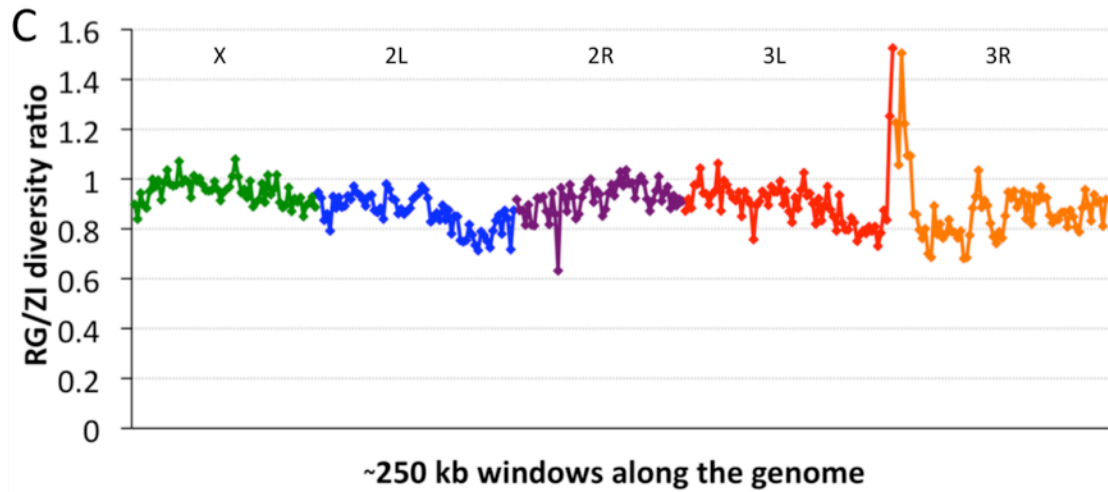

**Figure S7.** Population diversity ratios across the genome. (A) France (FR) vs. Rwanda (RG) illustrates different levels of non-African diversity loss for each major chromosome. (B) FR vs. Zambia (ZI) demonstrates that results from (A) are not driven by the RG-specific patterns. (C) RG vs. ZI shows less heterogeneity, and suggests that the peak observed in (B) is due to a ZI-specific loss of diversity around the chromosome 3 centromere. Chromosome arms are labeled and indicated by color. Each window contains 5000 RG non-singleton SNPs.
