# Supplementary material for: Population Genomics of Sub-Saharan Drosophila melanogaster: African Diversity and Non-African Admixture
Source: PLoS Genet. 2012 Dec 20;8(12):e1003080. doi: 10.1371/journal.pgen.1003080 (PMC3527209; doi:10.1371/journal.pgen.1003080)
Supplement: Table S4 — Regions of identity-by-descent masked from the analyzed data. Regions of identity by descent (defined as sequence divergence <0.0005) were identified using 500 kb windows, advanced at 100 kb. All pairs of genomes in the data set were examined (within and between population samples) for target arms on chromosomes X, 2, and 3. Our interest was to identify data that departs from population genetic assumptions due to close relatedness within population samples, and to mask this data in the FASTA files only. IBD regions were only masked if they occurred in within-population comparisons and if they exceeded the scale of IBD observed in between-population comparisons. Some genomic intervals, including centromeres and telomeres, had recurrent IBD in between- population comparisons (list below). Within these manually defined regions, IBD blocks up to 4 Mb occurred in between-population comparisons, and we elected to only filter within-population IBD blocks greater than 5 Mb. Outside of these recurrent IBD zones, we identified within-population pairs of individuals with more than 5 Mb of total genome-wide IBD (this was beyond the scale of total between-population IBD observed outside recurrent IBD zones). All IBD segments for these pairs (including those in recurrent IBD zones) were masked from one of the identical alleles. A buffer region of 100 kb was added to each IBD interval, to account for IBD extending between window increments. Note that position numbers for each arm are given starting with 1 (not 0), and are in closed format (the start and stop positions are the first and last bp included in a tract). (XLS) [file pgen.1003080.s012.xls]

## Sheet: Sheet1
masked_ind	unmasked_ind	arm	start	stop		Table S4. Regions of identity-by-descent masked from the analyzed data.
CO10b-3	CO10N	chr3L	1	4300000		Regions of identity by descent (defined as sequence divergence < 0.0005)
CO10b-3	CO10N	chr3L	6500001	7300000		were identified using 500 kb windows, advanced at 100 kb. All pairs of
CO10b-3	CO10N	chr3L	7500001	10000000		genomes in the data set were examined (within and between population
CO10b-3	CO10N	chr3R	7100001	9400000		samples) for target arms on chromosomes X, 2, and 3. Our interest was
CO10b-3	CO10N	chr3R	9500001	18000000		to identify data that departs from population genetic assumptions due to
CO10b-3	CO10N	chr3R	19100001	25300000		close relatedness within population samples, and to mask this data in
CO8b-3	CO8N	chr3L	1	24543557		the FASTA files only. IBD regions were only masked if they occurred in
CO8b-3	CO8N	chr3R	1	11400000		within-population comparisons and if they exceeded the scale of IBD
CO8b-3	CO8N	chr3R	13100001	27905053		observed in between-population comparisons. Some chromosomal intervals,
ED55-2	ED5N	chr2L	5200001	11500000		including centromeres and telomeres, had recurrent IBD in between-
FR229	FR361	chr2L	22400001	23011544		population comparisons (list below). Within these manually defined regions,
FR229	FR361	chr3R	5100001	27905053		IBD blocks up to 4 Mb occurred in between-population comparisons, and we
FR229	FR361	chrX	1	600000		elected to only filter within-population IBD blocks greater than 5 Mb.
GA125	GA141	chr2L	2000001	3000000		Outside of these recurrent IBD zones, we identified within-population
GA125	GA141	chr2L	6800001	8600000		pairs of individuals with more than 5 Mb of total genome-wide IBD (this
GA125	GA141	chr2L	9100001	10200000		was beyond the scale of total between-population IBD observed outside
GA125	GA141	chr2L	13000001	14400000		recurrent IBD zones). All IBD segments for these pairs (including those
GA125	GA141	chr2L	18700001	23011544		in recurrent IBD zones) were masked from one of the identical alleles.
GA125	GA141	chr2R	1	3800000		A buffer region of 100 kb was added to each IBD interval, to account for
GA125	GA141	chr2R	17400001	19200000		IBD extending between window increments. Note that position numbers
GA125	GA141	chrX	8700001	9700000		for each arm are given starting with 1 (not 0), and are in closed format
GA125	GA141	chrX	19800001	22100000		(the start and stop positions are the first and last bp included in a tract).
KN73-1-3	KN6	chr3L	16800001	24543557
KN73-1-3	KN6	chr3R	1	8200000
KR42	KR4N	chr2L	2000001	5200000
KR42	KR4N	chr2R	1	800000
KR42	KR4N	chr3L	12400001	15500000
KR42	KR4N	chr3L	20600001	21800000
KR42	KR4N	chr3R	11500001	16400000
RG10	RG11N	chr2L	20500001	21400000
RG10	RG11N	chrX	14200001	22422827
RG15	RG11N	chr2L	1	700000
RG15	RG11N	chr2L	10500001	23011544
RG15	RG11N	chr2R	1	6700000
RG15	RG11N	chr3L	2100001	2800000
Intervals excluded from pairwise IBD totals:
arm	start	stop	comments
chr2L	1	800000	telomere
chr2L	5200001	7400000	other recurrent IBD involving a small group (others not excluded)
chr2L	14400001	16400000	near centromere
chr2L	17600001	23011544	centromere
chr2R	1	5300000	centromere
chr2R	15400001	16300000	other recurrent IBD
chr2R	20200001	21146708	telomere
chr3L	14300001	24543557	centromere
chr3R	1	9800000	centromere
chr3R	14800001	23000000	intermittent IBD involving a small group (others not excluded)
chr3R	23000001	27905053	telomere
chrX	1	1800000	telomere
chrX	13200001	16400000	other recurrent IBD
chrX	17500001	19700000	other recurrent IBD
chrX	21300001	22422827	centromere
