# Supplementary material for: Population Genomics of Sub-Saharan Drosophila melanogaster: African Diversity and Non-African Admixture
Source: PLoS Genet. 2012 Dec 20;8(12):e1003080. doi: 10.1371/journal.pgen.1003080 (PMC3527209; doi:10.1371/journal.pgen.1003080)
Supplement: Table S6 — Admixture probabilities across genomic windows for secondary core and addendum genomes. For windows of 1000 RG non-singleton SNPs (coordinates listed), each genome's admixture probability from the HMM forward-backward algorithm is listed. Each chromosome arm is presented in a separate tab. These probabilities are provided only to illustrate the HMM's performance under challenging conditions of low sequencing depth. Aside from possibly the RG secondary core genomes, these probabilities may be less accurate than those for the primary core genomes (Table S5), and are not intended for ancestry assignment in downstream analyses. (XLS) [file pgen.1003080.s014.xls]

## Sheet: Legend
Table S6. Admixture probabilities across genomic windows for secondary core and addendum genomes.
For windows of 1000 RG non-singleton SNPs (coordinates listed), each genome's admixture probability
from the HMM forward-backward algorithm is listed. Each chromosome arm is presented in a separate tab.
These probabilities are provided only to illustrate the HMM's performance under challenging conditions
of low sequencing depth. Aside from possibly the RG secondary core genomes, these probabilities
may be less accurate than those for the primary core genomes (Table S5), and are not intended for
ancestry assignment in downstream analyses.

## Sheet: X
chr	window	start	stop	CK2	CO13N	CO9N	RC5	RG13N	RG37N	RG39	RG6N	RG8	SP173	SP188	SP221	SP235	SP241	SP80	ED19.1.3	EZ63.1.3	GA187	KN73.1.3	KO10.1.3	KO2.1.3	KO6.1.3	KR54.1.3	KR68.1.3	ZK131	ZK186	ZK84
chrX	0	0	354321	0.00381207	0.00187868	0.00198999	0.00639172	0.0513465	0.0508683	0.00451652	0.00115742	0.00123967	0.0558893	0.0418248	0.00145159	0.0477967	0.00347809	0.995562	0.00346688	0.0090292	0.00117365	0.00181477	0.53754	0.32623	0.0242768	0.00139309	0.0948812	0.00161042	0.00659715	0.00128071
chrX	1	354322	517447	0.00120473	0.000313201	0.000501037	0.00259562	0.0135807	0.0162917	0.00108843	0.000190719	0.000258673	0.0184608	0.00606633	0.000237794	0.00987959	0.00131428	0.998339	0.000616452	0.00111288	0.000196298	0.000903827	0.522504	0.301777	0.00257529	0.000279831	0.0603886	0.000318671	0.00175056	0.000148373
chrX	2	517448	631155	0.000471843	0.000236816	0.000443167	0.00192121	0.00635989	0.0113276	0.000958373	9.30045e-05	0.000271663	0.00402845	0.00240856	5.86472e-05	0.00600085	0.00102659	0.999028	0.000409821	0.000294342	4.97e-05	0.000210612	0.497632	0.298278	0.000421583	9.03e-05	0.0283105	4.3e-05	0.000711071	2.92e-05
chrX	3	631156	755785	0.000722479	4.7509e-05	0.00021601	0.00206618	0.00153227	0.00616419	0.000628718	2.38727e-05	0.000107038	0.00277524	0.000759234	6.98591e-05	0.00469488	0.000726607	0.998993	0.000929247	0.000243445	5.83e-05	0.000248322	0.397357	0.311158	0.000265866	0.000251605	0.0258746	1.86e-05	0.000111633	3.3e-05
chrX	4	755786	849787	0.000208427	6.21119e-05	0.000139177	0.000589912	0.000478338	0.00120161	0.00014455	3.61271e-05	2.40398e-05	0.00157744	0.000585668	0.000363696	0.00331329	0.000348305	0.998171	0.000412276	0.000160396	5.11e-05	0.000498162	0.0407175	0.309765	6.46e-05	0.000274242	0.0240009	4.17e-05	6.82e-05	9.09e-05
chrX	5	849788	955454	5.97985e-05	6.43924e-05	3.14026e-05	8.78998e-05	0.000267543	0.000243422	0.000100391	3.45963e-05	2.98752e-05	0.00248876	0.00152463	0.00222272	0.00492544	0.000859846	0.999473	0.000133071	5.78e-05	4.71e-05	0.000678642	0.00520324	0.292166	4.12e-05	0.000525033	0.0223089	0.000252866	0.000282383	0.000342917
chrX	6	955455	1069473	4.00224e-05	2.01267e-05	1.90634e-05	4.35257e-05	0.000240179	0.0001301	5.16608e-05	0.000112187	2.7324e-05	0.00319701	0.00226013	0.00390322	0.00634828	0.00116766	0.999824	2.75e-05	2.1e-05	2.48e-05	0.00073856	0.000571079	0.214661	1.97e-05	0.000577932	0.020422	0.000315775	0.000351249	0.000391041
chrX	7	1069474	1167602	1.9046e-05	2.59176e-05	4.84929e-05	0.000188673	6.14043e-05	8.22133e-05	0.000167364	4.34733e-05	1.50836e-05	0.00214796	0.00149459	0.0035271	0.00538395	0.00127186	0.999903	2.22e-05	4.44e-05	1.38e-05	0.000594698	9.5e-05	0.193143	1.99e-05	0.000426984	0.0108419	0.00017473	0.000318406	0.000235243
chrX	8	1167603	1302281	4.7051e-05	1.67134e-05	6.34039e-05	0.000669996	0.000137939	0.000311882	0.000119709	9.19207e-05	1.72525e-05	0.00111841	0.000695783	0.00295627	0.00421774	0.0011725	0.999898	2.13e-05	5.81e-05	1.62e-05	0.000246997	4.06e-05	0.189204	5.61e-05	7.21e-05	0.00282559	0.000140368	0.000236585	7.32e-05
chrX	9	1302282	1550596	2.60245e-05	3.04772e-05	0.000311317	0.000265906	0.000176436	0.000129141	8.43561e-05	4.71812e-05	3.69138e-05	0.000452158	7.99882e-05	0.000410949	0.000435035	0.000173662	0.99993	1.47e-05	3.54e-05	3.03e-05	0.000262977	8.24e-05	0.193755	0.000135824	5.52e-05	0.00205795	3.48e-05	5.21e-05	2.39e-05
chrX	10	1550597	1669962	7.29991e-05	2.52797e-05	6.63628e-05	0.000139333	7.39879e-05	3.29907e-05	2.83673e-05	2.12621e-05	1.64808e-05	6.42205e-05	2.13339e-05	5.94946e-05	5.9382e-05	3.47298e-05	0.999919	1.73e-05	3.02e-05	1.45e-05	0.000317337	5.52e-05	0.210087	2.7e-05	7.05e-05	0.00110249	1.83e-05	2.01e-05	1.71e-05
chrX	11	1669963	1814898	0.000472868	3.82005e-05	3.20489e-05	8.26625e-05	3.08361e-05	5.70024e-05	2.35606e-05	3.76857e-05	2.05779e-05	3.20485e-05	2.82001e-05	1.92575e-05	3.26912e-05	1.54098e-05	0.999872	2.24e-05	2.51e-05	1.59e-05	0.000225239	2.71e-05	0.243221	2.67e-05	0.000173076	0.000515491	4.41e-05	4.54e-05	4.55e-05
chrX	12	1814899	1982716	0.00338207	2.61925e-05	3.77373e-05	0.000126763	2.48214e-05	2.42036e-05	2.91141e-05	1.60378e-05	1.54624e-05	9.80622e-05	0.000109096	3.28931e-05	7.15896e-05	2.12294e-05	0.999823	1.36e-05	1.75e-05	1.58e-05	0.000158927	4.82e-05	0.417509	1.42e-05	0.00016549	0.000354259	4.59e-05	3.29e-05	2.21e-05
chrX	13	1982717	2108064	0.00713865	5.15563e-05	1.76053e-05	0.000365511	0.000113308	6.39591e-05	7.35402e-05	1.61261e-05	1.63378e-05	0.000109718	0.000171126	2.39393e-05	0.00014331	6.47899e-05	0.999857	1.72e-05	3.81e-05	1.31e-05	0.000106775	0.00015436	0.758019	1.51e-05	4.68e-05	5.75e-05	2.72e-05	2.22e-05	2.4e-05
chrX	14	2108065	2228643	0.0314696	0.000121004	3.91452e-05	0.000500318	0.000256743	2.89261e-05	0.000155811	2.017e-05	4.90682e-05	0.000288935	0.000336657	2.12573e-05	0.000375515	0.000149223	0.999738	2.72e-05	0.000132753	1.6e-05	0.000222915	0.0013212	0.856344	3.84e-05	9.4e-05	2.67e-05	6.39e-05	1.59e-05	1.87e-05
chrX	15	2228644	2309928	0.10031	0.000609776	0.000152371	7.84637e-05	0.000204172	6.8427e-05	0.000374858	8.51028e-05	0.000122008	0.000264189	0.000300559	1.82266e-05	0.000403791	2.96363e-05	0.9993	8.45e-05	0.000128461	1.36e-05	0.000135064	0.00231635	0.881407	0.000186549	0.000135313	8.34e-05	3.19e-05	3.7e-05	1.98e-05
chrX	16	2309929	2387773	0.390582	0.000963471	0.000473538	4.76769e-05	5.38381e-05	2.68903e-05	0.00115211	2.51717e-05	3.46467e-05	4.61074e-05	6.05013e-05	1.88817e-05	0.000337752	3.77559e-05	0.997728	2.02e-05	4.45e-05	1.47e-05	5.08e-05	0.0079128	0.887209	0.000518093	7.25e-05	8.52e-05	8.91e-05	1.87e-05	1.32e-05
chrX	17	2387774	2446937	0.460304	0.00177609	0.00294807	0.000161587	0.000117837	5.71903e-05	0.000679119	3.13812e-05	2.94244e-05	5.21415e-05	6.12638e-05	6.2355e-05	0.000365102	9.29254e-05	0.995685	2.02e-05	8.91e-05	1.61e-05	2.74e-05	0.0370234	0.885511	0.0032493	2.35e-05	6.8e-05	2.33e-05	1.61e-05	1.51e-05
chrX	18	2446938	2503252	0.476313	0.0104228	0.0151323	0.000447567	0.000267475	3.49688e-05	0.000242686	3.4152e-05	3.51081e-05	4.9345e-05	0.000307859	3.55549e-05	0.000200434	0.000224615	0.994926	1.47e-05	0.000279907	3.74e-05	0.000110057	0.0647932	0.885486	0.0248857	4.05e-05	0.000328062	3.82e-05	1.32e-05	4.09e-05
chrX	19	2503253	2578613	0.536984	0.0195621	0.0416127	0.00144124	0.000103336	7.00895e-05	0.000404322	1.89592e-05	2.52719e-05	3.23848e-05	0.000271438	6.81384e-05	0.000284917	0.000245987	0.998238	1.81e-05	6.96e-05	1.96e-05	0.000967867	0.352256	0.899558	0.0302806	0.000188107	0.000396326	1.6e-05	1.65e-05	3.58e-05
chrX	20	2578614	2644086	0.813726	0.0428558	0.179123	0.00115111	0.000113169	0.000314358	0.000906085	2.09051e-05	7.35101e-05	9.0044e-05	0.000222948	0.000421424	0.000592007	0.000297966	0.999018	1.82e-05	3.31e-05	1.4e-05	0.00178306	0.425869	0.951161	0.0297736	0.000140257	0.000291742	1.58e-05	3.3e-05	1.64e-05
chrX	21	2644087	2713713	0.946835	0.082292	0.762897	0.000879265	6.60022e-05	0.000191685	0.000734683	6.58473e-05	0.000520472	2.86883e-05	0.000334785	0.000229272	0.000470894	0.000433497	0.999143	6.29e-05	8.48e-05	2.23e-05	0.00195534	0.790813	0.964566	0.0341483	0.000180213	0.000242658	4.43e-05	0.00014103	3.04e-05
chrX	22	2713714	2785986	0.98527	0.124691	0.935689	0.000582223	5.28537e-05	0.000210396	0.000138323	3.80381e-05	7.93981e-05	6.5048e-05	0.00059183	0.000375974	0.000285117	0.000392925	0.998625	0.000317742	0.000550826	7.02e-05	0.000295464	0.939381	0.967418	0.0654982	6.97e-05	4.35e-05	1.92e-05	0.000149798	1.45e-05
chrX	23	2785987	2843296	0.996104	0.154841	0.982427	9.65784e-05	4.66562e-05	4.83949e-05	0.000109539	1.53671e-05	7.16048e-05	0.000260642	0.000846824	0.000692435	0.00024781	0.000180838	0.99653	9.89e-05	0.000357759	2.94e-05	0.000141051	0.983083	0.965527	0.0735725	0.000126192	5.62e-05	1.8e-05	8.73e-05	1.75e-05
chrX	24	2843297	2912893	0.998856	0.221145	0.995292	7.13601e-05	0.00011452	2.18966e-05	8.22154e-05	1.78513e-05	8.85882e-05	0.000359462	0.00121171	0.000899566	0.000178553	0.000363505	0.989118	0.000190245	0.00028227	5.97e-05	7.22e-05	0.994371	0.954329	0.0729627	7.5e-05	0.000175926	5.97e-05	3.36e-05	2.91e-05
chrX	25	2912894	2989621	0.999597	0.274484	0.998441	0.000182189	7.03266e-05	3.39723e-05	9.56694e-05	6.28898e-05	8.51207e-05	0.000313567	0.00137763	0.00119262	0.000331136	0.000344661	0.989512	0.000142862	0.000111065	0.000157642	3.6e-05	0.997499	0.913026	0.0626829	9.61e-05	0.000755226	0.000112757	1.46e-05	5.17e-05
chrX	26	2989622	3063232	0.999857	0.426268	0.999329	0.000110111	0.000200659	0.000139749	5.09341e-05	0.000318558	0.000174238	9.31769e-05	0.00141975	0.000203381	0.000279771	0.000121876	0.996225	2.71e-05	2.44e-05	0.000268812	6.11e-05	0.99819	0.75392	0.0181978	0.000104733	0.00683793	0.000121103	1.36e-05	6.56e-05
chrX	27	3063233	3130352	0.999911	0.757628	0.999767	9.63781e-05	0.00147622	0.00095296	3.25502e-05	0.000289459	0.000139796	0.000171108	0.00383133	0.000184641	0.000978627	0.000198134	0.99878	2.68e-05	2.65e-05	0.00122492	0.000138835	0.999475	0.628015	0.0137623	0.000629305	0.0204565	0.000349481	1.61e-05	0.00013724
chrX	28	3130353	3180752	0.999918	0.844904	0.999888	7.58509e-05	0.00164463	0.00110888	3.96843e-05	0.000753271	0.000684565	0.000230588	0.00369514	0.000335904	0.000536304	0.00013678	0.999448	1.46e-05	3.18e-05	0.00256514	0.000623257	0.999809	0.592668	0.00317007	0.00129137	0.0235285	0.000454716	1.85e-05	0.000210832
chrX	29	3180753	3250692	0.999892	0.869873	0.999894	0.000204649	0.000365915	0.00083693	0.00010061	0.000879149	0.00214217	0.000157691	0.00229207	0.000203985	0.000405637	0.000103116	0.999526	1.9e-05	8.59e-05	0.0167249	0.000165236	0.999914	0.59389	0.00157477	0.00128829	0.0230931	0.000473412	3.58e-05	0.000303881
chrX	30	3250693	3322703	0.999742	0.889983	0.999834	0.000160225	0.0003409	0.000945103	6.59196e-05	0.00123859	0.00524914	0.000700472	0.00122605	9.6033e-05	7.67845e-05	9.57324e-05	0.999416	3.21e-05	0.000204139	0.0901362	0.000225807	0.999944	0.642949	0.0020209	0.0009217	0.0171477	0.000358756	0.000224733	0.000345152
chrX	31	3322704	3381487	0.999109	0.893661	0.999604	5.37794e-05	9.6019e-05	0.00151776	2.80111e-05	0.000263806	0.00532809	0.000900455	0.000318181	0.000247085	2.30054e-05	3.18725e-05	0.998741	0.000163809	0.000446353	0.470887	0.000640967	0.999943	0.899906	0.00463649	0.000360832	0.00597547	7.35e-05	0.000326151	0.000207337
chrX	32	3381488	3447230	0.997013	0.889106	0.999036	0.000171369	7.71136e-05	0.00160417	6.87401e-05	0.000144281	0.00812648	0.00259509	0.000216925	8.86364e-05	1.78965e-05	4.17857e-05	0.996359	0.000581506	0.000519203	0.685006	0.000261838	0.999946	0.971463	0.00779147	0.000266118	0.0047153	3.48e-05	0.000614252	5.07e-05
chrX	33	3447231	3520641	0.98905	0.894722	0.999364	0.000102392	0.000134579	0.00469997	0.000114622	0.000151422	0.0108242	0.00856566	0.000599266	6.28763e-05	5.72116e-05	0.000270355	0.994725	0.000225244	0.000103106	0.745072	0.000396231	0.999951	0.991627	0.00755138	7.51e-05	0.00184226	2.78e-05	0.000102687	2.37e-05
chrX	34	3520642	3568917	0.975005	0.916442	0.999204	6.39481e-05	0.00100166	0.0179186	0.000522999	0.000650151	0.0106089	0.0164693	0.00179831	0.000194513	0.000469071	0.000810381	0.990163	7.44e-05	4.97e-05	0.761351	0.00107225	0.999949	0.997483	0.0125707	2.8e-05	0.000843137	9.36e-05	3.59e-05	7.75e-05
chrX	35	3568918	3659526	0.919429	0.921712	0.998258	0.000266265	0.000846137	0.0207034	0.000370367	0.000995605	0.00714424	0.0179511	0.00165948	0.000652804	0.00315479	0.0040448	0.972441	8.11e-05	3.28e-05	0.762322	0.000639865	0.99995	0.999229	0.0192548	3.59e-05	0.000282959	0.000187318	7e-05	7.76e-05
chrX	36	3659527	3736947	0.699761	0.921259	0.994447	0.000423306	0.00144691	0.0320364	0.00105392	0.000660496	0.00195097	0.0192361	0.000565226	0.000907281	0.00339407	0.00707678	0.900269	3.02e-05	0.00015518	0.748954	0.00094661	0.999948	0.99975	0.0306322	0.000145033	4.88e-05	8.55e-05	4.18e-05	2.42e-05
chrX	37	3736948	3792464	0.613444	0.911472	0.978527	0.0024061	0.00305785	0.0335815	0.000542692	9.39773e-05	0.00075129	0.0218129	0.000816762	0.000932988	0.00566132	0.0109356	0.656445	5.5e-05	9.27e-05	0.697476	0.00106964	0.999951	0.999902	0.0427475	5.61e-05	4.41e-05	4.22e-05	2.78e-05	1.55e-05
chrX	38	3792465	3876459	0.605181	0.879967	0.918171	0.00232948	0.00319452	0.0293198	0.000522102	6.93023e-05	0.000175663	0.0202691	0.00142617	0.00168545	0.00542946	0.010934	0.59256	9.39e-05	0.000132974	0.684147	0.0012779	0.999952	0.99994	0.125439	0.000161414	1.56e-05	5.35e-05	5.87e-05	2.94e-05
chrX	39	3876460	3946371	0.608018	0.802154	0.734884	0.00170638	0.00102259	0.0102564	6.55791e-05	6.57871e-05	3.39893e-05	0.0106528	0.000682831	0.00104475	0.00170393	0.00685535	0.451203	0.00044395	0.000523674	0.654167	0.00150885	0.999952	0.999947	0.359612	8.99e-05	1.57e-05	2.61e-05	7.61e-05	3.37e-05
chrX	40	3946372	4026692	0.605148	0.532587	0.409099	0.00122607	0.000706791	0.00426938	2.45626e-05	1.79195e-05	2.26974e-05	0.00375615	0.00028829	0.000442466	0.000228488	0.00286216	0.439191	0.00015935	0.000355861	0.530475	0.00029421	0.999952	0.999947	0.816973	3.17e-05	1.31e-05	1.56e-05	5.95e-05	2.84e-05
chrX	41	4026693	4099879	0.627777	0.157295	0.305112	0.000201559	0.000580159	0.0030163	2.72783e-05	1.71199e-05	1.9605e-05	0.00101266	0.000143468	0.000439957	7.49408e-05	0.00207641	0.435638	0.000205514	0.000169685	0.0699565	5.03e-05	0.999947	0.999938	0.945094	2.47e-05	1.53e-05	2.99e-05	4.75e-05	1.75e-05
chrX	42	4099880	4154179	0.750319	0.085023	0.296889	8.81968e-05	0.00140104	0.00182321	0.00012769	1.36185e-05	4.88185e-05	0.000384149	0.000225414	0.000266941	0.000159915	0.00128069	0.419624	0.000283935	6.35e-05	0.0137248	5.53e-05	0.99994	0.999927	0.97953	3.32e-05	4.32e-05	2.35e-05	0.000142033	3.75e-05
chrX	43	4154180	4236168	0.90518	0.0715326	0.310506	2.06271e-05	0.0022375	0.00151169	2.40731e-05	2.22166e-05	4.67093e-05	0.000112154	0.00126586	0.000152412	8.02833e-05	0.000281402	0.356966	4.22e-05	3.39e-05	0.00528823	0.000233476	0.999926	0.999889	0.988297	0.000181702	0.000321322	8.96e-05	0.000204318	1.91e-05
chrX	44	4236169	4292061	0.94604	0.0200697	0.310007	1.71586e-05	0.00150407	0.00124733	1.53631e-05	0.000113682	5.80712e-05	0.000184193	0.00104967	0.00060585	0.00028306	0.000276183	0.131985	2.91e-05	0.000127739	0.00138135	0.000662685	0.99994	0.999799	0.990329	0.000732726	0.00162518	0.000178695	0.00111273	2.91e-05
chrX	45	4292062	4352812	0.95726	0.0144607	0.306249	5.37481e-05	0.00111185	0.000803592	3.12524e-05	3.54966e-05	3.76221e-05	6.05937e-05	0.000685061	0.00095384	0.0005094	0.0012367	0.11001	0.000102793	7.1e-05	0.000782765	0.000157589	0.999947	0.999901	0.989763	0.00303789	0.0026683	0.000487464	0.0042252	5.31e-05
chrX	46	4352813	4412930	0.959374	0.0102771	0.290467	0.000429407	0.000569832	0.0001561	0.000128758	1.84098e-05	4.11786e-05	8.67567e-05	8.79695e-05	0.000228411	0.000537673	0.000959659	0.111876	0.000242238	0.000149461	0.00146933	3.12e-05	0.999946	0.999926	0.985565	0.018405	0.00193603	6.81e-05	0.00565246	5.32e-05
chrX	47	4412931	4463504	0.965472	0.00228403	0.2608	0.000117003	0.00101116	0.00016796	0.000303674	3.84666e-05	7.14877e-05	0.000221505	4.57305e-05	0.000181626	0.000397894	0.000714181	0.151232	7.31e-05	0.000317368	0.000903436	3.73e-05	0.999949	0.99992	0.987055	0.0663928	0.000544091	2.02e-05	0.00458991	6.08e-05
chrX	48	4463505	4528637	0.986361	0.000519427	0.263845	0.000250874	0.00202751	6.80996e-05	0.000437345	2.21502e-05	2.36254e-05	0.000152261	1.77211e-05	3.13551e-05	5.41953e-05	0.000268854	0.2405	4.45e-05	0.000266686	0.000478108	0.000107364	0.999942	0.99989	0.993133	0.079733	0.000132785	2.91e-05	0.000702253	7.5e-05
chrX	49	4528638	4590708	0.995872	0.000297715	0.278257	0.00078126	0.0123185	1.86917e-05	0.000910808	5.34353e-05	5.66286e-05	0.000699296	2.30073e-05	2.73494e-05	2.10993e-05	5.85145e-05	0.283023	0.00021904	0.000551371	0.0001095	2.23e-05	0.999951	0.999723	0.998176	0.127762	0.000193469	1.47e-05	8.43e-05	0.00050596
chrX	50	4590709	4655386	0.998629	0.000230997	0.279517	0.000259081	0.0158054	1.7797e-05	0.000303444	8.05941e-05	0.000150462	0.000294876	1.43302e-05	2.95987e-05	2.90221e-05	4.32751e-05	0.37648	0.000286219	0.000671346	2.98e-05	1.56e-05	0.999951	0.999346	0.999488	0.139462	0.000335229	1.75e-05	2.92e-05	8.18e-05
chrX	51	4655387	4718173	0.999543	0.000208152	0.27096	0.000265796	0.0289002	4.83046e-05	0.000270615	0.000102495	0.000382411	5.33186e-05	1.44989e-05	2.98275e-05	5.0525e-05	5.94704e-05	0.45181	0.000670215	0.00225319	5.28e-05	3.51e-05	0.999948	0.999795	0.999815	0.150479	0.000149944	1.97e-05	8.5e-05	5.55e-05
chrX	52	4718174	4785515	0.999774	0.000778123	0.229828	0.000257023	0.0338811	6.44333e-05	0.00108554	0.000174557	0.000740225	2.08566e-05	3.04729e-05	4.5932e-05	6.09576e-05	4.58645e-05	0.844071	0.000537478	0.00408648	0.000177719	2.24e-05	0.999945	0.999906	0.999906	0.274286	3.31e-05	4.38e-05	0.000147143	2.83e-05
chrX	53	4785516	4856042	0.999789	0.00178078	0.0721077	9.59125e-05	0.0342965	0.000439032	0.00103084	0.000161679	8.81646e-05	5.0682e-05	1.80357e-05	0.00031172	5.71118e-05	4.38941e-05	0.954615	0.000523653	0.00447718	0.000447126	5.1e-05	0.999943	0.999928	0.999929	0.306308	2.58e-05	2.7e-05	0.000136831	3.25e-05
chrX	54	4856043	4917506	0.999603	0.0015279	0.0305835	0.000108143	0.0289847	0.00103579	0.000137716	3.71685e-05	1.99098e-05	0.000391365	2.83744e-05	0.000764124	0.000345663	0.000107873	0.987132	0.000762606	0.00302007	0.00073752	1.85e-05	0.999944	0.999917	0.999941	0.312206	8.93e-05	1.59e-05	3.03e-05	1.44e-05
chrX	55	4917507	4987750	0.998874	0.000485737	0.0173827	7.12155e-05	0.00685165	0.000496681	3.40875e-05	5.74553e-05	1.48801e-05	0.000199425	3.27121e-05	0.0002001	8.11584e-05	0.000305156	0.996295	0.000217984	0.000629839	8.33e-05	3.32e-05	0.999943	0.999858	0.999947	0.305351	3.35e-05	3.23e-05	2.56e-05	1.26e-05
chrX	56	4987751	5050495	0.996367	0.000229792	0.0095828	0.000167219	0.00451971	0.000683585	4.54445e-05	7.9604e-05	2.8229e-05	0.000495253	8.17163e-05	0.000280391	0.000139803	0.000610996	0.998961	0.000289064	0.000317366	1.98e-05	0.000193551	0.999945	0.999635	0.999944	0.269604	6.8e-05	3.55e-05	0.000121618	1.36e-05
chrX	57	5050496	5112445	0.989788	0.000383679	0.00369794	0.000428022	0.00498684	0.00110922	0.000300476	0.000328964	0.000168627	0.00060217	0.000574739	0.000577493	0.00030897	0.000713003	0.999667	0.000682554	0.000271579	1.46e-05	0.000595118	0.999945	0.99868	0.999923	0.132265	0.000528474	0.000159216	0.000452896	2.48e-05
chrX	58	5112446	5176652	0.983906	0.00033364	0.00362977	0.000484917	0.00525194	0.000408596	0.00035155	0.000487224	0.00011149	0.000505251	0.000205281	0.000670749	0.000274182	0.00061122	0.999866	0.000171511	0.00010338	1.78e-05	0.000140051	0.999946	0.995312	0.999862	0.102231	0.000184455	0.000268229	8.38e-05	1.7e-05
chrX	59	5176653	5230485	0.981428	0.000819135	0.00692831	0.000406563	0.00531509	0.000442951	0.000312381	0.000240497	2.87016e-05	0.000204456	4.58615e-05	0.000566613	4.4196e-05	0.000305604	0.999922	3.46e-05	3.53e-05	1.56e-05	7.98e-05	0.99995	0.98178	0.99965	0.10221	0.000190261	6.22e-05	5.83e-05	3.45e-05
chrX	60	5230486	5312863	0.981918	0.000578488	0.0186784	0.000403255	0.00351688	0.000904583	5.37301e-05	8.20988e-05	3.34405e-05	0.000537459	8.49675e-05	0.000297778	4.05534e-05	0.000453832	0.99994	2.71e-05	2.47e-05	2.01e-05	0.000365458	0.999947	0.967885	0.998794	0.10755	3.8e-05	9.39e-05	3.69e-05	0.000117939
chrX	61	5312864	5363554	0.978667	0.0010393	0.0385086	0.000228088	0.00496013	0.00592065	6.47838e-05	3.47863e-05	2.79252e-05	0.000666598	7.64586e-05	6.72118e-05	0.000122022	0.00149536	0.999943	2.2e-05	3.14e-05	1.3e-05	8.83e-05	0.999948	0.920667	0.999439	0.112406	1.62e-05	3.38e-05	5.59e-05	3.23e-05
chrX	62	5363555	5423426	0.966351	0.000764183	0.0463936	0.000115387	0.00439221	0.00659625	0.000130832	4.53657e-05	2.78041e-05	0.000417549	0.000429469	7.4769e-05	0.000809651	0.00117215	0.999943	1.44e-05	4.25e-05	1.23e-05	0.000106111	0.99995	0.885899	0.99957	0.119447	2.3e-05	8.02e-05	1.69e-05	2.07e-05
chrX	63	5423427	5474214	0.947127	0.000472781	0.0464457	0.000230641	0.00066854	0.00633074	4.68217e-05	7.94127e-05	9.65361e-05	0.000273316	0.000258828	1.91608e-05	0.000727578	0.000348546	0.999951	1.33e-05	0.000175629	1.25e-05	0.000578819	0.999944	0.881643	0.999276	0.116624	0.00010451	2.61e-05	1.59e-05	4.7e-05
chrX	64	5474215	5529729	0.933191	0.000206649	0.0405291	0.000326878	0.000104588	0.007741	8.32863e-05	3.22416e-05	2.08154e-05	5.66858e-05	4.38423e-05	1.75369e-05	0.000459112	6.03362e-05	0.999951	1.85e-05	0.000187977	1.29e-05	0.000895191	0.999934	0.875779	0.997974	0.0973299	3.77e-05	6.58e-05	4.52e-05	2e-05
chrX	65	5529730	5581296	0.887565	9.94831e-05	0.0205581	0.00179978	4.02452e-05	0.0245206	4.14313e-05	2.77913e-05	1.53504e-05	1.99597e-05	4.82443e-05	1.564e-05	0.000128327	6.26167e-05	0.999952	3.89e-05	0.000218467	1.9e-05	0.000296298	0.999895	0.879695	0.992593	0.0194394	1.78e-05	8.19e-05	3.43e-05	2.7e-05
chrX	66	5581297	5634694	0.872109	6.82174e-05	0.00633372	0.00348655	0.000143461	0.121824	9.91414e-05	2.82143e-05	2.3379e-05	4.02551e-05	7.01871e-05	2.94818e-05	0.000252114	7.45441e-05	0.999954	5.5e-05	0.000249526	1.36e-05	0.000190173	0.999776	0.875664	0.993104	0.0103247	1.99e-05	0.000115287	3.68e-05	3.95e-05
chrX	67	5634695	5696202	0.871398	0.000206158	0.00476989	0.00375723	0.000116153	0.286699	4.2028e-05	5.35018e-05	4.18306e-05	5.9866e-05	9.29844e-05	5.98355e-05	0.000455898	5.08272e-05	0.999948	8.33e-05	0.000295608	1.97e-05	0.000780713	0.999561	0.852586	0.998143	0.00848338	1.51e-05	0.000396744	8.17e-05	4.82e-05
chrX	68	5696203	5745402	0.902625	0.000470005	0.00605467	0.0087586	0.000198828	0.646461	2.65618e-05	0.000333335	0.000294657	8.57576e-05	4.48232e-05	0.00014189	0.00106521	0.000110912	0.999939	8.62e-05	0.000488634	1.77e-05	0.00458828	0.999678	0.757743	0.99945	0.00716859	3.29e-05	0.000100373	0.000149753	2.18e-05
chrX	69	5745403	5808562	0.910725	0.0011056	0.0072905	0.0137213	9.9499e-05	0.747693	8.30357e-05	6.64883e-05	6.23408e-05	0.000164655	5.89917e-05	5.70441e-05	0.000599876	0.000179793	0.999921	3.61e-05	0.000216457	1.63e-05	0.0119007	0.999507	0.422874	0.999816	0.00074001	2.82e-05	0.000153256	8.8e-05	1.31e-05
chrX	70	5808563	5873409	0.911107	0.00100163	0.00577113	0.0151567	0.000225016	0.773708	3.379e-05	0.000102247	6.50644e-05	0.00010006	1.92589e-05	2.00054e-05	0.000133591	3.36814e-05	0.999849	4.2e-05	0.000110779	4.73e-05	0.0133511	0.999675	0.34426	0.9999	0.000122245	2.98e-05	4.23e-05	4.07e-05	1.27e-05
chrX	71	5873410	5918222	0.914912	0.000364313	0.00320989	0.0131292	0.000134359	0.787619	8.15713e-05	2.12574e-05	2.61186e-05	3.4483e-05	2.95569e-05	1.96563e-05	0.000192399	1.89782e-05	0.999869	0.000109396	0.000155919	9.92e-05	0.0201337	0.999525	0.322686	0.999931	0.000116841	2.3e-05	0.00010857	0.000113958	1.62e-05
chrX	72	5918223	5970868	0.916794	0.000439411	0.00245917	0.00225873	0.000154902	0.788225	7.19603e-05	1.32586e-05	2.58259e-05	0.000107614	3.80861e-05	7.46809e-05	0.0012806	4.22038e-05	0.999752	6.67e-05	0.000108924	0.000145954	0.021087	0.998677	0.232248	0.999942	0.000333507	4.54e-05	8.37e-05	3.35e-05	1.54e-05
chrX	73	5970869	6037228	0.921727	0.000820423	0.00236517	0.000805309	8.34872e-05	0.776212	0.000145519	1.36419e-05	3.9993e-05	0.000593043	0.000123934	0.000121857	0.00102828	3.6977e-05	0.999367	4.32e-05	8.96e-05	6.21e-05	0.0177385	0.998963	0.120072	0.999928	0.00213543	1.62e-05	3.6e-05	4.16e-05	3.71e-05
chrX	74	6037229	6101083	0.943185	0.000972125	0.00363352	0.000541951	0.000202001	0.729778	0.000338894	2.57593e-05	5.07673e-05	0.00103163	0.000930752	0.000553694	0.000929752	3.15998e-05	0.997798	3.7e-05	5.23e-05	4.6e-05	0.00241927	0.999143	0.0759544	0.999891	0.00240728	1.73e-05	2.87e-05	1.99e-05	1.9e-05
chrX	75	6101084	6165328	0.947801	0.00063455	0.00338798	0.00157089	0.000539623	0.562854	0.000469025	7.79652e-05	5.01961e-05	0.000507255	0.00181433	0.000788797	0.000725322	0.000130159	0.996802	2.07e-05	2.4e-05	2.36e-05	0.000984359	0.998639	0.0587908	0.99976	0.00106052	4.99e-05	1.66e-05	2.1e-05	1.38e-05
chrX	76	6165329	6221663	0.951307	0.000239156	0.00234152	0.00162983	0.000130654	0.194877	0.000529586	0.000150073	1.855e-05	0.000117559	0.00120899	0.000228955	0.000175773	0.000151605	0.994977	2.23e-05	6.73e-05	1.47e-05	0.000233214	0.999537	0.0575254	0.999548	0.000558646	2e-05	3.93e-05	2.21e-05	2.15e-05
chrX	77	6221664	6305930	0.949222	0.000265878	0.00337014	0.000369307	5.43258e-05	0.0683136	0.000460447	4.43014e-05	3.53749e-05	6.14438e-05	0.000614947	4.5703e-05	8.0202e-05	0.000102064	0.996864	2.26e-05	1.96e-05	2.6e-05	0.000181068	0.999847	0.0619711	0.99874	0.000461625	1.87e-05	2.71e-05	2.11e-05	2.46e-05
chrX	78	6305931	6387854	0.935833	7.49981e-05	0.00251458	5.50423e-05	2.93001e-05	0.0322603	8.32333e-05	1.7916e-05	2.05209e-05	8.2825e-05	0.000213512	4.62198e-05	0.000285745	0.000168271	0.998863	3.03e-05	2.83e-05	0.00015111	4.67e-05	0.999916	0.0863165	0.995446	0.000412324	1.76e-05	1.78e-05	6.27e-05	2.04e-05
chrX	79	6387855	6437060	0.911738	2.79303e-05	0.000718656	2.07656e-05	4.12725e-05	0.0239384	0.000108115	2.58751e-05	4.36524e-05	0.000296646	4.10433e-05	2.67774e-05	0.000809346	0.000228222	0.999638	5.65e-05	6.38e-05	0.000257239	3.02e-05	0.99992	0.249208	0.992609	0.00174657	4.59e-05	5.16e-05	7.62e-05	2.47e-05
chrX	80	6437061	6497271	0.908556	1.59912e-05	0.000116192	1.57103e-05	0.000226731	0.0154223	0.000191258	3.15836e-05	0.00013696	0.000410043	2.73585e-05	0.000107409	0.0011467	0.000214185	0.999856	2.54e-05	7.21e-05	0.00056335	1.46e-05	0.999887	0.294674	0.991887	0.00951413	0.000264949	9.44e-05	9.86e-05	6.16e-05
chrX	81	6497272	6555390	0.925884	1.38714e-05	6.07598e-05	2.67278e-05	0.000257995	0.00883569	0.000190309	3.44919e-05	2.6242e-05	0.000319526	0.000108738	0.000105786	0.000590534	0.000166214	0.999929	1.47e-05	4.22e-05	0.000107224	1.72e-05	0.999744	0.305753	0.997548	0.0691602	0.000708437	2.05e-05	7.76e-05	2.13e-05
chrX	82	6555391	6616770	0.929752	2.24218e-05	1.88498e-05	1.87628e-05	9.53447e-05	0.00328791	3.00968e-05	1.93003e-05	2.44195e-05	8.60783e-05	4.29431e-05	5.41738e-05	0.000211452	6.85757e-05	0.999944	1.58e-05	1.77e-05	6.47e-05	1.73e-05	0.999734	0.303388	0.999321	0.680487	0.00555	1.43e-05	2.7e-05	4.67e-05
chrX	83	6616771	6676911	0.926388	1.45602e-05	1.65826e-05	6.09104e-05	6.06667e-05	0.000529785	1.7273e-05	5.52781e-05	3.86158e-05	0.000160176	1.56602e-05	0.000158996	0.000207548	0.000136055	0.999945	1.44e-05	1.43e-05	0.000321168	2.45e-05	0.999592	0.336674	0.999746	0.884305	0.0464957	2.18e-05	3.76e-05	0.000251563
chrX	84	6676912	6739039	0.935064	2.53376e-05	2.68892e-05	0.000161039	1.80264e-05	0.000196537	2.2454e-05	7.24743e-05	1.68043e-05	5.72432e-05	1.48599e-05	7.94879e-05	5.85675e-05	9.98269e-05	0.999947	2.89e-05	2.76e-05	5.24e-05	2.41e-05	0.998958	0.422446	0.999881	0.937824	0.108781	0.000109428	2.18e-05	0.000730269
chrX	85	6739040	6807773	0.956146	4.97836e-05	1.87656e-05	0.00013488	2.12209e-05	0.000478504	2.72401e-05	0.000471492	2.1772e-05	0.000194251	3.55607e-05	0.000127697	0.000134557	0.000410019	0.999946	0.000101525	9.09e-05	1.72e-05	7.69e-05	0.999684	0.748847	0.999897	0.951071	0.190186	0.000352248	7.46e-05	0.000186676
chrX	86	6807774	6859698	0.969621	4.18581e-05	1.7493e-05	0.000137573	4.5505e-05	0.000559524	1.48655e-05	0.000755192	2.31539e-05	0.000171572	4.15825e-05	3.37577e-05	6.97473e-05	0.000516298	0.999947	8.77e-05	0.000296134	1.31e-05	0.000408528	0.999872	0.881685	0.999911	0.95379	0.357602	8.37e-05	4.25e-05	4.39e-05
chrX	87	6859699	6910573	0.972944	0.000111377	5.82238e-05	0.000658999	8.38299e-05	0.00223481	1.2828e-05	0.000273786	4.81525e-05	0.000899412	0.000266258	3.87099e-05	0.000279125	0.00168813	0.999947	9.74e-05	0.000972021	1.64e-05	5.9e-05	0.999924	0.9183	0.999935	0.951018	0.40279	8.69e-05	6.86e-05	3.12e-05
chrX	88	6910574	6960495	0.988341	0.000802587	0.000370517	0.000367266	4.42336e-05	0.00243733	1.43401e-05	0.000376265	2.58922e-05	0.000593416	0.00062926	4.83283e-05	8.76556e-05	0.0118168	0.999945	0.000337072	0.00497435	1.65e-05	3.37e-05	0.999938	0.927792	0.999942	0.93762	0.413748	3.77e-05	0.000221092	1.51e-05
chrX	89	6960496	7016522	0.992647	0.00043804	0.000161332	0.000487032	0.000141043	0.000774544	2.48838e-05	0.000491462	5.21673e-05	0.000578453	9.65425e-05	0.000180579	0.000165198	0.0141605	0.999944	0.000403294	0.00620462	5.18e-05	3.52e-05	0.999943	0.9284	0.999944	0.889076	0.410529	0.000113284	0.00122891	2.01e-05
chrX	90	7016523	7082077	0.993424	0.000151046	8.91727e-05	0.000436861	3.38289e-05	0.000177515	8.49609e-05	0.000197985	8.66976e-05	0.000528945	2.60737e-05	0.000126841	6.61121e-05	0.0130085	0.999944	0.000749031	0.00599342	5.94e-05	2.03e-05	0.999944	0.921238	0.999944	0.716539	0.387245	4.94e-05	0.00127375	1.35e-05
chrX	91	7082078	7153388	0.992178	0.000185418	0.00016365	0.000331996	2.04059e-05	5.23566e-05	2.01075e-05	0.000102103	6.77789e-05	0.00032629	2.84381e-05	6.48265e-05	9.38214e-05	0.00522627	0.999944	0.000331899	0.00258253	1.8e-05	1.41e-05	0.999943	0.893196	0.999944	0.0785723	0.301278	2.37e-05	0.000776682	1.47e-05
chrX	92	7153389	7210628	0.986628	3.71122e-05	0.000173838	5.04873e-05	5.75869e-05	5.72139e-05	1.57856e-05	3.72715e-05	4.59862e-05	6.90536e-05	6.58578e-05	2.38421e-05	0.000187437	0.00481163	0.999951	9.3e-05	0.000490193	2.28e-05	1.26e-05	0.999941	0.792951	0.999945	0.0162648	0.0337574	7.54e-05	0.000136571	1.61e-05
chrX	93	7210629	7263378	0.968558	1.4818e-05	4.37161e-05	1.79954e-05	6.34631e-05	6.25884e-05	1.86776e-05	2.05492e-05	3.67513e-05	8.85097e-05	1.99411e-05	2.82297e-05	0.000325384	0.00578186	0.999946	2.72e-05	7.77e-05	1.55e-05	1.38e-05	0.999928	0.546591	0.999951	0.0103779	0.00764183	0.000624887	6.44e-05	1.67e-05
chrX	94	7263379	7320554	0.967052	1.37732e-05	3.78344e-05	2.10961e-05	2.55043e-05	2.31115e-05	2.8012e-05	2.07125e-05	1.61333e-05	0.000572224	3.04426e-05	6.71437e-05	0.000799404	0.0045184	0.999948	2.19e-05	3.37e-05	1.35e-05	2.54e-05	0.999946	0.459848	0.999949	0.0112346	0.00148328	0.0026224	2.89e-05	1.63e-05
chrX	95	7320555	7379692	0.968199	1.47326e-05	3.41303e-05	2.45708e-05	3.05293e-05	2.04308e-05	4.37627e-05	1.93275e-05	2.60297e-05	0.000134791	8.74324e-05	4.07516e-05	0.000554554	0.00165253	0.999937	3.32e-05	3.68e-05	1.91e-05	9.68e-05	0.999949	0.121539	0.999939	0.0132489	0.000546984	0.00248115	4.33e-05	3.97e-05
chrX	96	7379693	7450548	0.963959	3.62358e-05	2.24079e-05	0.000123306	0.000174239	4.36226e-05	3.40164e-05	4.872e-05	5.95032e-05	0.000172316	0.000329413	3.95539e-05	0.00162019	0.00147295	0.999883	3.35e-05	2.89e-05	8.28e-05	0.000542507	0.999948	0.0248432	0.999906	0.0115381	0.000145572	0.000297503	4.44e-05	0.000204078
chrX	97	7450549	7545891	0.944779	4.50392e-05	6.03234e-05	7.89563e-05	0.000281435	0.000136914	8.12156e-05	0.000100483	1.94804e-05	4.86933e-05	0.000393543	8.54975e-05	0.00286061	0.0010899	0.999697	1.42e-05	1.7e-05	0.000557481	0.00480449	0.999945	0.0034949	0.999786	0.0033225	0.000113619	5.38e-05	2.18e-05	3.49e-05
chrX	98	7545892	7627038	0.944755	3.12407e-05	0.000454096	5.25749e-05	0.000304619	6.26754e-05	0.000133731	3.42912e-05	1.39237e-05	0.000115946	0.00033224	0.000115683	0.00416373	0.000503202	0.998941	1.26e-05	2.06e-05	0.000145242	0.0359208	0.999912	0.0011042	0.999273	0.00038392	2.92e-05	2.12e-05	1.62e-05	2.43e-05
chrX	99	7627039	7683455	0.96374	3.82111e-05	0.00450063	0.000184129	0.000193433	0.000256819	0.000543146	7.7362e-05	1.41062e-05	0.00033232	0.000143128	6.63033e-05	0.00717511	0.000172633	0.996685	1.44e-05	2.08e-05	4.77e-05	0.335904	0.999931	0.000329919	0.99936	4.86e-05	3.48e-05	5.19e-05	3.93e-05	4.97e-05
chrX	100	7683456	7750042	0.988003	0.000145012	0.00867317	0.000431343	0.000562315	0.000272826	0.00192623	0.000165041	3.06129e-05	0.000264393	0.000279888	0.00028537	0.00872646	0.000251637	0.98886	3.31e-05	8.71e-05	7.58e-05	0.457834	0.999917	0.000334617	0.999629	1.71e-05	0.000169099	2.28e-05	0.000236273	4.51e-05
chrX	101	7750043	7848874	0.994808	0.000310738	0.00890715	0.000504143	0.000734091	0.000664766	0.00209827	3.82565e-05	1.81216e-05	0.000318251	0.000420615	0.000304905	0.00759346	0.000126663	0.961087	1.43e-05	3.3e-05	2.01e-05	0.491513	0.999853	0.00055123	0.999563	2.46e-05	4.32e-05	1.6e-05	4.82e-05	1.87e-05
chrX	102	7848875	7912274	0.996506	0.000604594	0.00780747	0.000161022	0.000167056	0.000161589	0.00235166	7.55589e-05	4.73128e-05	0.00015352	0.000111278	0.000147769	0.00133694	6.13159e-05	0.85899	1.26e-05	2.58e-05	2.39e-05	0.499198	0.999629	0.00177333	0.998972	4.81e-05	8.45e-05	3.03e-05	3.44e-05	4.12e-05
chrX	103	7912275	7991021	0.996529	0.000195935	0.00208774	0.000131112	0.000149649	0.000218169	0.000685454	7.92137e-05	2.37162e-05	0.000206137	0.000118019	0.000442189	0.000699667	0.000262328	0.496711	1.23e-05	1.62e-05	1.75e-05	0.496545	0.998789	0.00225786	0.99671	0.000157789	2.11e-05	1.46e-05	6.92e-05	3.35e-05
chrX	104	7991022	8046464	0.996049	0.000120096	0.000978864	0.000535403	0.00045262	0.000949501	0.000136703	3.04356e-05	1.41444e-05	0.000178081	0.000104579	0.000817901	0.000504575	0.000604532	0.209721	1.32e-05	3.78e-05	2.96e-05	0.487095	0.998795	0.00576407	0.991424	0.00120291	2.47e-05	1.55e-05	6.24e-05	0.000121905
chrX	105	8046465	8100325	0.993568	0.000137733	0.00116754	0.000265198	0.000228877	0.000796795	0.000122724	6.36106e-05	1.73439e-05	6.92036e-05	5.40742e-05	0.000143903	0.000224941	0.000167772	0.0404054	1.97e-05	2.11e-05	3.29e-05	0.441895	0.999224	0.0100384	0.970545	0.00818187	2.14e-05	2.2e-05	4.41e-05	2.33e-05
chrX	106	8100326	8160040	0.994103	0.000141177	0.00433661	9.99142e-05	4.71946e-05	0.0001274	2.75039e-05	9.18321e-05	6.2798e-05	9.58217e-05	3.7171e-05	3.46351e-05	8.57281e-05	3.00286e-05	0.0225989	1.8e-05	1.76e-05	1.48e-05	0.442847	0.999626	0.0252824	0.894033	0.0325748	1.85e-05	3.2e-05	1.6e-05	1.61e-05
chrX	107	8160041	8215859	0.998446	0.000474091	0.0208316	0.00017693	4.00751e-05	5.62857e-05	1.9061e-05	0.000659546	0.000126487	0.000249151	0.000123609	2.71465e-05	0.000202396	2.50153e-05	0.0171274	1.87e-05	4.7e-05	1.71e-05	0.456822	0.99984	0.181884	0.87779	0.135419	2.06e-05	2.74e-05	1.78e-05	3.94e-05
chrX	108	8215860	8275739	0.999523	0.000726132	0.0324282	0.000164889	2.94758e-05	2.64924e-05	1.9097e-05	0.000248708	0.000557352	0.0005098	0.000102393	2.22557e-05	5.34793e-05	0.000116084	0.0127536	1.95e-05	2.31e-05	4.66e-05	0.45451	0.999867	0.424952	0.814286	0.274005	4.5e-05	5.03e-05	2.97e-05	0.000154181
chrX	109	8275740	8344777	0.999842	0.000456976	0.0345125	4.19649e-05	1.70312e-05	4.32946e-05	2.10447e-05	4.1984e-05	0.000100662	0.000880017	0.000434181	3.57516e-05	9.81495e-05	0.000197192	0.00232519	3.54e-05	7.69e-05	0.000249416	0.429768	0.99978	0.599471	0.568205	0.309065	9.52e-05	0.000306955	5.51e-05	8.15e-05
chrX	110	8344778	8399002	0.999915	0.000245706	0.0367309	9.8314e-05	2.01018e-05	0.000234132	2.15876e-05	2.06739e-05	2.14069e-05	0.00111727	0.000187026	3.4507e-05	8.65458e-05	0.00015096	0.000305124	1.99e-05	2.13e-05	0.00223341	0.340944	0.99936	0.64542	0.184038	0.31569	2.88e-05	0.000483886	2.11e-05	0.000108558
chrX	111	8399003	8447712	0.999942	7.85122e-05	0.0696768	5.76707e-05	8.68026e-05	4.07201e-05	1.76556e-05	3.81783e-05	1.52851e-05	0.000183649	5.03548e-05	6.64289e-05	5.81024e-05	0.000141462	4.8278e-05	3.15e-05	3.04e-05	0.00231385	0.0551077	0.999768	0.654797	0.0483678	0.308301	7.34e-05	0.000737447	1.36e-05	2.19e-05
chrX	112	8447713	8500762	0.999946	8.18825e-05	0.404574	2.25577e-05	2.94435e-05	2.33055e-05	1.42002e-05	1.86709e-05	1.4003e-05	2.92866e-05	9.41557e-05	3.22228e-05	1.68892e-05	3.2923e-05	3.19459e-05	1.74e-05	2e-05	0.0004734	0.00573526	0.99988	0.673011	0.00496011	0.272265	5.27e-05	0.0040181	1.42e-05	1.57e-05
chrX	113	8500763	8555983	0.999946	0.000318375	0.765852	6.05779e-05	1.5224e-05	1.58727e-05	2.39411e-05	1.51134e-05	1.90327e-05	1.40402e-05	2.10895e-05	3.86252e-05	1.40096e-05	5.96405e-05	7.89711e-05	2.13e-05	1.68e-05	0.000119475	0.000613531	0.999865	0.871556	0.000730577	0.123363	2.59e-05	0.00514375	1.99e-05	1.62e-05
chrX	114	8555984	8615260	0.99993	0.000380535	0.884756	7.20597e-05	1.65253e-05	3.71664e-05	4.71276e-05	1.51544e-05	2.58173e-05	1.36317e-05	1.90033e-05	2.12056e-05	1.74703e-05	3.70167e-05	4.44293e-05	1.91e-05	1.73e-05	2.6e-05	0.000122415	0.999712	0.928865	8.64e-05	0.0354901	2.12e-05	0.0046006	1.32e-05	4.56e-05
chrX	115	8615261	8669244	0.999861	0.000452	0.970251	0.00015419	4.03992e-05	6.07145e-05	3.31611e-05	3.91804e-05	0.000141502	1.41656e-05	1.83285e-05	6.96828e-05	4.00995e-05	7.18232e-05	0.000100721	3.97e-05	2.02e-05	1.37e-05	2.77e-05	0.999867	0.945172	2.94e-05	0.00777765	8.39e-05	0.00232168	1.49e-05	2.37e-05
chrX	116	8669245	8726903	0.999777	0.000302257	0.991902	0.000100068	6.46231e-05	9.31533e-05	8.83532e-05	2.82275e-05	0.000317438	2.91785e-05	2.19234e-05	8.36113e-05	9.04665e-05	0.000138552	0.000312902	2.61e-05	3.09e-05	1.26e-05	3.05e-05	0.999931	0.950756	2.79e-05	0.00479195	4.13e-05	0.000379004	1.82e-05	7.23e-05
chrX	117	8726904	8775699	0.999884	0.000334877	0.997284	4.77929e-05	6.1855e-05	0.000585631	0.00044058	2.70474e-05	7.88047e-05	0.000135928	6.69901e-05	4.84447e-05	0.000182611	4.78921e-05	0.000773109	1.49e-05	0.000107818	1.23e-05	0.000134834	0.999946	0.953137	0.000110783	0.00587791	0.000122459	0.000210931	1.81e-05	6.16e-05
chrX	118	8775700	8827164	0.999875	0.000327595	0.998812	1.6207e-05	2.88145e-05	0.000625746	0.000240511	1.51382e-05	2.17534e-05	0.000709674	0.000112299	0.000214712	9.14756e-05	2.19996e-05	0.000372532	2.51e-05	0.000937523	1.24e-05	2.58e-05	0.999949	0.950775	0.000635472	0.0182325	0.000649067	7.85e-05	4.12e-05	4.07e-05
chrX	119	8827165	8884170	0.999735	0.000203054	0.999163	1.76318e-05	4.50415e-05	0.000814348	0.000266043	1.5409e-05	1.39726e-05	0.0058275	0.000258746	0.00198018	0.000276611	6.71992e-05	0.000155238	0.000141899	0.00893406	1.25e-05	2.28e-05	0.999942	0.941966	0.00480802	0.0237936	0.00283594	5.51e-05	0.000153106	0.000101386
chrX	120	8884171	8930909	0.999787	0.000616419	0.999178	1.93304e-05	0.000233578	0.00260783	0.000768317	2.03963e-05	2.02815e-05	0.0583052	0.00201226	0.0106302	0.000681701	0.000344183	0.000366199	0.000761028	0.0503462	1.24e-05	4.88e-05	0.99991	0.94582	0.0264032	0.0307829	0.00500414	3.01e-05	0.000613711	0.000223766
chrX	121	8930910	8976717	0.999576	0.00282582	0.998796	4.57678e-05	0.00102829	0.0041983	0.00141887	1.53083e-05	2.30336e-05	0.0706505	0.00645927	0.0205434	0.00319199	0.00112446	0.00119444	0.000681395	0.0618902	1.42e-05	4.08e-05	0.999803	0.943256	0.0311125	0.0312699	0.00458332	7.39e-05	0.000128052	0.000281755
chrX	122	8976718	9050868	0.998796	0.00284796	0.997005	0.000285809	0.000946786	0.00357234	0.00114196	2.34195e-05	1.47678e-05	0.0721142	0.0070655	0.0329308	0.00323313	0.00101192	0.000773875	0.000200124	0.080036	1.25e-05	4.3e-05	0.999434	0.929384	0.0309801	0.0261459	0.000683476	3.21e-05	4.5e-05	6.12e-05
chrX	123	9050869	9116832	0.999027	0.00395792	0.996916	0.000619342	0.00319834	0.0061265	0.00121265	1.92679e-05	1.84924e-05	0.0742858	0.00886038	0.0349955	0.00486678	0.00323512	0.00125236	3.78e-05	0.269143	1.25e-05	1.89e-05	0.998162	0.878122	0.0398559	0.00433521	0.000210663	1.45e-05	1.8e-05	8.2e-05
chrX	124	9116833	9186612	0.999085	0.00355916	0.997372	0.000517733	0.00360221	0.00591072	0.0002677	5.95435e-05	4.95055e-05	0.0696225	0.00771458	0.0331607	0.0047408	0.00362096	0.000813372	1.54e-05	0.319585	1.44e-05	4.39e-05	0.993761	0.699188	0.0982754	0.000480847	0.000207285	1.38e-05	2.31e-05	2.4e-05
chrX	125	9186613	9239030	0.99834	0.00165389	0.99779	9.94379e-05	0.0018319	0.00222144	9.09922e-05	2.63712e-05	5.06313e-05	0.0492579	0.00128979	0.021438	0.00151066	0.00210998	0.00161318	1.6e-05	0.332523	1.44e-05	4.47e-05	0.993232	0.679976	0.122567	0.00011252	3.2e-05	1.55e-05	1.73e-05	1.57e-05
chrX	126	9239031	9314767	0.998086	0.000332892	0.998368	3.24482e-05	0.000291721	0.000263285	2.16794e-05	3.20757e-05	2.12407e-05	0.00626446	0.000286953	0.0027257	0.000345107	0.000319799	0.00178762	1.58e-05	0.350839	1.28e-05	5.31e-05	0.994537	0.669914	0.360122	2.54e-05	1.76e-05	4.38e-05	1.37e-05	1.52e-05
chrX	127	9314768	9383154	0.999461	0.000168429	0.998445	8.1931e-05	9.34895e-05	4.03198e-05	2.24785e-05	8.80088e-05	1.79538e-05	0.00140294	0.000258835	0.000949166	5.35349e-05	0.000151846	0.00224251	3.23e-05	0.418618	1.43e-05	9.08e-05	0.99826	0.654714	0.824084	1.43e-05	4.24e-05	4.81e-05	1.38e-05	1.27e-05
chrX	128	9383155	9435285	0.999811	0.000131918	0.997902	0.000160084	0.000133931	3.02328e-05	2.8719e-05	0.000212104	5.80724e-05	0.00074828	0.00119204	0.000473045	3.52327e-05	0.000179234	0.00418015	3.58e-05	0.483668	2.16e-05	2.76e-05	0.999329	0.589725	0.942109	1.97e-05	7.3e-05	1.96e-05	1.6e-05	1.44e-05
chrX	129	9435286	9488872	0.999918	0.000283219	0.995139	0.00018313	0.000158953	0.000105477	2.99715e-05	0.000154685	4.31081e-05	0.00128084	0.0108967	0.000361879	7.55874e-05	0.000347905	0.00649459	2.57e-05	0.501338	3.05e-05	6.87e-05	0.999493	0.350448	0.972749	1.7e-05	8.86e-05	2.32e-05	1.71e-05	1.48e-05
chrX	130	9488873	9543491	0.999938	0.000312615	0.99432	6.68809e-05	4.03822e-05	6.90892e-05	3.04687e-05	7.05542e-05	3.35383e-05	0.000657516	0.0127654	7.95517e-05	0.000155911	0.000187433	0.0125794	2.93e-05	0.529994	2.04e-05	0.000555888	0.999839	0.314953	0.992456	3.06e-05	0.000315839	1.64e-05	5.49e-05	3.31e-05
chrX	131	9543492	9610474	0.999942	0.000925345	0.998072	3.62605e-05	9.03916e-05	0.00012653	0.000101006	8.64486e-05	1.48347e-05	0.000713594	0.0109334	2.00554e-05	3.83846e-05	3.66222e-05	0.0670197	0.000104028	0.541504	1.9e-05	0.00268947	0.999922	0.220629	0.99788	0.000190781	0.000260145	4.25e-05	5.25e-05	3.05e-05
chrX	132	9610475	9666209	0.999948	0.0013027	0.998937	0.000108926	6.76191e-05	4.82219e-05	2.84483e-05	2.71407e-05	1.7095e-05	0.00222878	0.0017009	1.38346e-05	2.52134e-05	5.18611e-05	0.105898	8.58e-05	0.537497	3.02e-05	0.00267947	0.999946	0.103644	0.999245	0.000589263	0.000224582	2.53e-05	0.000143922	2.19e-05
chrX	133	9666210	9726133	0.999947	0.00223596	0.999666	3.44278e-05	0.000102541	5.02597e-05	5.07647e-05	5.7568e-05	4.94023e-05	0.0124428	0.000311424	1.27196e-05	2.39209e-05	2.58476e-05	0.122994	4.58e-05	0.538037	8.51e-05	0.00621786	0.999949	0.0345988	0.99961	7.61e-05	0.000315596	2.65e-05	0.00014053	1.75e-05
chrX	134	9726134	9775331	0.999944	0.00271271	0.99985	2.43635e-05	2.46326e-05	2.10987e-05	2.56967e-05	6.96305e-05	3.23751e-05	0.0162102	6.98323e-05	1.4275e-05	3.47353e-05	1.57314e-05	0.128568	0.000191567	0.580996	0.000613548	0.0302997	0.999944	0.0184125	0.999751	2.45e-05	0.000125151	5.34e-05	0.000633326	5.49e-05
chrX	135	9775332	9821460	0.999947	0.00251087	0.999866	0.000103915	1.55268e-05	2.20138e-05	2.15346e-05	6.11341e-05	8.05093e-05	0.0158392	0.000119203	2.43643e-05	8.20254e-05	2.18068e-05	0.127695	0.000347434	0.590144	0.000254798	0.0363072	0.999916	0.00883277	0.9997	4.78e-05	0.000183549	0.000403255	0.000666656	3.7e-05
chrX	136	9821461	9867202	0.999951	0.00141315	0.99974	0.000258651	3.3236e-05	2.04e-05	8.51856e-05	0.000143178	0.000389633	0.0106507	6.23826e-05	2.61793e-05	0.000183228	0.000106111	0.118593	0.000417236	0.585639	0.000116018	0.0360754	0.999812	0.00312372	0.999322	3.77e-05	0.000314594	0.000238764	0.000247251	2.01e-05
chrX	137	9867203	9923405	0.999954	0.000488703	0.99919	0.000275199	2.94792e-05	7.18235e-05	5.18292e-05	0.00110026	0.000772726	0.00568559	0.000198339	7.6063e-05	8.87351e-05	5.90319e-05	0.118509	8.95e-05	0.558729	0.000176674	0.0290874	0.999482	0.00261546	0.999782	0.000117931	0.000767332	0.000229552	3.53e-05	5.77e-05
chrX	138	9923406	9977453	0.99995	0.000420834	0.997445	0.000279654	2.33969e-05	0.000574469	2.59105e-05	0.00399744	8.87668e-05	0.00283734	0.000464091	9.96259e-05	0.000206686	0.000256809	0.107762	2.71e-05	0.462725	0.000305174	0.00307588	0.998155	0.00502567	0.999904	0.000121766	0.00572631	3.75e-05	1.58e-05	0.000101646
chrX	139	9977454	10041768	0.999952	0.000335797	0.995449	0.00075941	7.27688e-05	0.002069	9.4897e-05	0.00465617	2.31848e-05	0.00053332	0.000620597	6.76061e-05	0.00017819	0.00025061	0.114392	1.98e-05	0.0978143	0.00115801	0.000517868	0.999444	0.0254683	0.999938	0.000142893	0.0372634	3.18e-05	1.6e-05	2.83e-05
chrX	140	10041769	10088559	0.999946	0.000911057	0.993111	0.00149772	0.000478667	0.00987817	4.35284e-05	0.00306815	3.74992e-05	0.000386003	0.000275124	3.67562e-05	0.000145313	5.06423e-05	0.129	3.41e-05	0.0623634	0.00108851	0.000351264	0.999751	0.22265	0.999942	0.000896629	0.147545	7.44e-05	4.75e-05	5.25e-05
chrX	141	10088560	10136418	0.999945	0.00438807	0.983396	0.000969198	0.000102096	0.0119719	3.62973e-05	0.00215596	9.9897e-05	0.000165779	0.000224436	6.22935e-05	0.000173481	2.36924e-05	0.130696	0.000102621	0.0462708	0.00263441	5.16e-05	0.999832	0.780953	0.999944	0.000607067	0.19386	4.12e-05	0.000337345	3.64e-05
chrX	142	10136419	10189712	0.999944	0.0175457	0.95049	0.000327437	6.53472e-05	0.0204296	0.0001399	0.00154866	0.000837202	0.000216024	0.000224023	1.75424e-05	0.00106962	4.48353e-05	0.121337	0.000534771	0.0444234	0.00289735	3.91e-05	0.999762	0.938291	0.999944	0.000533943	0.2046	4.3e-05	0.00125896	8.37e-05
chrX	143	10189713	10256776	0.999944	0.0227118	0.820386	0.00011239	2.74804e-05	0.0314003	0.000382007	0.000737907	0.00304233	6.4128e-05	5.2738e-05	1.59449e-05	0.0017621	2.69122e-05	0.1219	9.82e-05	0.0313715	0.00126841	3.26e-05	0.999414	0.982632	0.999944	0.000709554	0.203052	3.11e-05	0.000925083	0.000187956
chrX	144	10256777	10323595	0.999944	0.0542809	0.30622	0.000290026	6.43158e-05	0.0702454	6.8683e-05	0.000117363	0.00495075	2.23138e-05	2.90017e-05	4.2667e-05	0.00103321	0.000112802	0.112072	2.32e-05	0.0320496	0.000963753	0.000174525	0.99809	0.995129	0.999945	0.00101669	0.18638	9.51e-05	0.00161834	0.000186067
chrX	145	10323596	10389309	0.999941	0.0742043	0.124676	0.000149228	0.000183808	0.0855861	9.2146e-05	5.01753e-05	0.00578222	5.21035e-05	0.000102981	0.000317732	0.00173125	0.000251729	0.105214	1.94e-05	0.0261979	0.00218602	0.000154659	0.999424	0.998587	0.999944	0.00128454	0.140129	6.82e-05	0.00180242	9.87e-05
chrX	146	10389310	10449815	0.999934	0.113355	0.101384	0.000405415	0.000990452	0.0876529	0.000401651	0.000197226	0.0149299	0.000235826	0.000352938	0.00307896	0.00248419	0.00033688	0.103285	7.19e-05	0.00366035	0.00182637	0.0002046	0.999797	0.999562	0.999944	0.000288343	0.105864	0.000114232	0.000936643	3.71e-05
chrX	147	10449816	10511191	0.999907	0.123961	0.0113181	0.000219684	0.00092534	0.0828128	0.000318829	0.000229494	0.109753	0.00218462	0.00183613	0.0117377	0.00910202	0.00122712	0.0910646	0.00057913	0.00146746	0.000590718	3.87e-05	0.999901	0.999837	0.999943	5.68e-05	0.0153413	0.000175603	0.000110595	0.000113791
chrX	148	10511192	10608725	0.999937	0.122665	0.00259904	0.00061524	0.00190141	0.0941763	0.000122252	0.000596558	0.220821	0.0217565	0.00431248	0.0368666	0.067655	0.00267342	0.0420374	0.000378084	0.000984897	0.000183546	1.7e-05	0.999929	0.999915	0.999942	3.6e-05	0.00391842	7.58e-05	3.75e-05	2.87e-05
chrX	149	10608726	10679077	0.999949	0.149268	0.00114191	0.00173472	0.0126061	0.118415	3.2253e-05	0.00127089	0.351006	0.0411332	0.00416211	0.0618065	0.126032	0.00391673	0.0375251	8.14e-05	0.000691806	0.000117666	2.86e-05	0.99994	0.999936	0.999944	4.92e-05	0.00301189	2.23e-05	1.54e-05	1.61e-05
chrX	150	10679078	10760967	0.999946	0.190827	0.00044853	0.00173763	0.0403242	0.306938	3.95e-05	0.000695674	0.806903	0.0849725	0.00450576	0.167402	0.188238	0.00660189	0.036517	9.08e-05	0.000638884	0.000141426	7.86e-05	0.999944	0.999942	0.999945	1.72e-05	0.00184158	1.38e-05	1.88e-05	1.31e-05
chrX	151	10760968	10818658	0.999945	0.337147	0.0001992	0.00178987	0.157234	0.732868	0.000244468	0.000179826	0.935371	0.131636	0.00579109	0.272861	0.261135	0.00908567	0.0508341	5.06e-05	0.000503274	3.43e-05	2.01e-05	0.999947	0.999944	0.999949	1.58e-05	0.000405117	1.56e-05	3.87e-05	1.83e-05
chrX	152	10818659	10865915	0.999944	0.52183	9.84408e-05	0.00210452	0.187137	0.849338	0.000786318	4.41781e-05	0.972433	0.143434	0.00528706	0.302678	0.281542	0.008395	0.0531743	0.000121139	0.00143799	2.26e-05	2.16e-05	0.999949	0.999943	0.999946	2.27e-05	0.000185778	1.79e-05	9.06e-05	2.09e-05
chrX	153	10865916	10916080	0.999943	0.835086	0.000113721	0.00310269	0.192233	0.882709	0.000980167	2.23777e-05	0.983303	0.142719	0.000987537	0.30726	0.28278	0.00295336	0.0595005	0.000351816	0.00245773	8.75e-05	9.57e-05	0.999945	0.999943	0.999944	0.000116382	0.000212208	2.59e-05	4.13e-05	1.58e-05
chrX	154	10916081	10967317	0.999941	0.914364	0.000221243	0.00237083	0.195292	0.890589	0.000970335	7.34445e-05	0.995258	0.127315	0.00037809	0.364032	0.268553	0.0021961	0.0656469	0.000250876	0.00231772	3.22e-05	3.44e-05	0.999943	0.999941	0.999943	4.88e-05	0.000235952	1.9e-05	0.000106988	4.03e-05
chrX	155	10967318	11038410	0.999933	0.936906	0.00157892	0.00222066	0.18735	0.889483	0.00232987	0.000216945	0.998628	0.12135	0.000580161	0.606519	0.257802	0.0024076	0.0917207	0.000126444	0.00175364	2.74e-05	6.17e-05	0.999938	0.999931	0.999938	0.000131994	4.28e-05	5.41e-05	8.07e-05	3.22e-05
chrX	156	11038411	11102685	0.999923	0.972372	0.0135673	0.00152204	0.151238	0.875088	0.00389437	0.00185221	0.999431	0.10203	7.38149e-05	0.687145	0.221161	0.000705245	0.299739	6.13e-05	0.000942454	8.79e-05	0.000100375	0.999904	0.999919	0.99991	5.66e-05	3.13e-05	2.86e-05	2.88e-05	4.85e-05
chrX	157	11102686	11156939	0.999877	0.982366	0.0168444	0.00273281	0.0278403	0.815851	0.00335609	0.00195687	0.999591	0.0210158	3.56229e-05	0.706949	0.0917326	0.000510872	0.384161	0.000140731	0.00128852	0.000105738	2.14e-05	0.999795	0.999863	0.999819	2.43e-05	6.32e-05	7.67e-05	4.66e-05	3.22e-05
chrX	158	11156940	11215060	0.999709	0.984213	0.0162238	0.00225586	0.00946383	0.692475	0.000413891	0.000347538	0.999403	0.00898489	5.73129e-05	0.839568	0.0287367	0.000153126	0.823238	8.82e-05	0.000842342	0.00020455	1.78e-05	0.999366	0.999658	0.99946	2.17e-05	0.000361193	2.2e-05	5.91e-05	9e-05
chrX	159	11215061	11272604	0.999087	0.98284	0.0107172	0.00157575	0.00219174	0.539741	0.000154482	6.49812e-05	0.998661	0.00181124	0.000246124	0.946766	0.0190053	0.000261713	0.951588	2.18e-05	0.000366049	3.71e-05	2.4e-05	0.997854	0.998864	0.998335	1.53e-05	7.18e-05	1.7e-05	1.79e-05	8.61e-05
chrX	160	11272605	11328119	0.99955	0.974913	0.0100453	0.000646627	0.00047382	0.0813307	4.73295e-05	8.06712e-05	0.995835	0.000212896	0.00031053	0.975224	0.0112088	5.65887e-05	0.986504	1.69e-05	0.000205152	2.1e-05	2.02e-05	0.998874	0.996343	0.994182	1.38e-05	8.12e-05	1.73e-05	2.1e-05	2.96e-05
chrX	161	11328120	11377340	0.999591	0.942969	0.0116436	0.00104262	0.000462584	0.0122006	4.26511e-05	0.000158243	0.984016	7.53739e-05	0.0014959	0.982069	0.010176	7.57183e-05	0.996112	3.91e-05	0.000673471	1.75e-05	6.71e-05	0.99924	0.9864	0.980163	2.64e-05	0.000199394	2.93e-05	5.48e-05	8.81e-05
chrX	162	11377341	11460121	0.999197	0.829489	0.0097412	0.00303365	0.000148264	0.00552532	0.000243038	0.00123237	0.942089	3.05829e-05	0.00171396	0.983309	0.00653959	0.000175729	0.998818	2.59e-05	0.000611815	3.26e-05	3.18e-05	0.999056	0.951132	0.930409	0.000136686	0.000323156	0.000174772	4.77e-05	0.000164432
chrX	163	11460122	11561308	0.997937	0.380974	0.00146331	0.00297092	0.000157599	0.00530453	0.000133738	0.0014137	0.793321	3.00865e-05	0.000272917	0.981212	0.0050927	7.17299e-05	0.999573	3.36e-05	8.8e-05	0.000173209	0.000120429	0.997981	0.825986	0.753859	4.3e-05	0.000329041	0.000116241	2.36e-05	3.68e-05
chrX	164	11561309	11629057	0.99341	0.0483752	0.000212771	0.000739638	0.000108474	0.00488182	6.51696e-05	0.000251189	0.206321	0.000148363	0.000114712	0.972175	0.0034438	0.000259406	0.999759	7.29e-05	6.7e-05	0.00057684	2.84e-05	0.994045	0.36065	0.127387	0.000109949	0.000115691	2.24e-05	5.52e-05	2.04e-05
chrX	165	11629058	11718091	0.994148	0.0152866	5.40744e-05	0.000650542	0.000112983	0.00449084	1.98068e-05	3.58768e-05	0.0212765	0.000292272	4.23817e-05	0.935282	0.00197448	0.000245179	0.999718	2.57e-05	6.33e-05	7.91e-05	2.55e-05	0.987145	0.060943	0.0533534	3e-05	3.21e-05	1.43e-05	0.000237819	1.33e-05
chrX	166	11718092	11778035	0.998159	0.0109764	3.31987e-05	0.00085738	0.000606191	0.00543216	3.15791e-05	1.5993e-05	0.00207928	0.000704231	0.000146852	0.78462	0.00129513	0.000554719	0.9996	1.7e-05	3.13e-05	2.36e-05	0.000110232	0.971939	0.0138602	0.0454573	6.78e-05	5.05e-05	1.43e-05	0.00214418	1.26e-05
chrX	167	11778036	11838672	0.999161	0.00274847	2.32459e-05	0.00023461	0.000577724	0.00495531	1.809e-05	1.47564e-05	0.000217082	0.000786258	0.000259033	0.386662	0.000700847	0.00055347	0.998876	2.48e-05	2.19e-05	1.55e-05	2.36e-05	0.9683	0.00143067	0.0482471	2.4e-05	3.75e-05	1.25e-05	0.0022084	1.23e-05
chrX	168	11838673	11892861	0.999265	0.000373632	2.23651e-05	5.33436e-05	0.000234263	0.00180794	1.66858e-05	2.28242e-05	3.89716e-05	0.000316943	0.000154184	0.130368	0.000373293	0.000328758	0.995976	1.37e-05	1.57e-05	1.27e-05	1.39e-05	0.967638	0.000196316	0.0534351	1.74e-05	2.61e-05	1.3e-05	0.000284338	1.23e-05
chrX	169	11892862	11938540	0.999062	0.00018519	2.78869e-05	5.05853e-05	0.000382939	0.00194489	5.11563e-05	1.61586e-05	1.66884e-05	0.000605353	0.000547222	0.105732	0.000849217	0.000802924	0.988916	1.43e-05	1.62e-05	1.23e-05	1.5e-05	0.97078	4.08e-05	0.0526786	2.32e-05	1.68e-05	1.22e-05	4.96e-05	1.35e-05
chrX	170	11938541	11987770	0.997794	8.60098e-05	0.000158217	1.75986e-05	9.38461e-05	0.00027199	2.1025e-05	1.37554e-05	1.78171e-05	9.87692e-05	0.000111173	0.0105959	0.000232467	0.000222465	0.961387	2.09e-05	1.71e-05	1.22e-05	1.28e-05	0.978252	2.48e-05	0.0437188	1.57e-05	2.1e-05	1.24e-05	2.25e-05	1.44e-05
chrX	171	11987771	12033035	0.998364	8.43818e-05	0.00150872	2.46528e-05	5.41217e-05	3.81761e-05	1.60556e-05	1.32369e-05	1.38414e-05	2.90982e-05	5.96355e-05	0.00130513	5.26599e-05	5.28196e-05	0.889429	2.54e-05	1.95e-05	1.22e-05	1.27e-05	0.988034	1.95e-05	0.0461412	1.49e-05	2.37e-05	1.25e-05	1.64e-05	1.38e-05
chrX	172	12033036	12089564	0.99922	0.000127692	0.00432579	9.13017e-05	2.70815e-05	1.72932e-05	2.0097e-05	2.1831e-05	1.24256e-05	1.70712e-05	0.000170837	0.00043027	2.60446e-05	3.19409e-05	0.609575	4.98e-05	4.24e-05	1.22e-05	1.59e-05	0.99515	2.91e-05	0.0665777	1.57e-05	3.75e-05	1.23e-05	2.16e-05	1.51e-05
chrX	173	12089565	12142125	0.999271	0.000123135	0.00682139	6.49394e-05	2.83316e-05	1.52149e-05	1.81147e-05	1.42633e-05	1.26665e-05	2.17427e-05	0.000270497	0.000143338	2.34824e-05	0.000102323	0.172728	2.51e-05	1.96e-05	1.23e-05	1.78e-05	0.998173	3.55e-05	0.138664	1.37e-05	4.26e-05	1.23e-05	2.26e-05	2.04e-05
chrX	174	12142126	12205697	0.999012	0.000130887	0.0101085	0.000123807	1.61973e-05	3.71395e-05	2.81423e-05	1.24702e-05	1.51575e-05	0.000103397	9.46412e-05	0.00016253	7.78214e-05	0.000273295	0.0885771	4.54e-05	3.83e-05	1.33e-05	2.98e-05	0.999483	0.000147273	0.444936	1.33e-05	5.13e-05	1.33e-05	4.44e-05	1.57e-05
chrX	175	12205698	12261432	0.999238	0.000278297	0.0152236	3.93729e-05	2.62424e-05	1.9779e-05	9.00392e-05	1.25606e-05	3.0227e-05	2.12496e-05	0.000115298	2.93606e-05	3.0125e-05	0.000295757	0.0260892	2.52e-05	5.1e-05	1.54e-05	8.37e-05	0.99981	0.000322507	0.857984	2.14e-05	0.000128379	1.26e-05	2.4e-05	3.61e-05
chrX	176	12261433	12314313	0.999718	0.000326993	0.0170763	6.01212e-05	3.88574e-05	4.53912e-05	3.29215e-05	1.61673e-05	1.61628e-05	1.39397e-05	2.51986e-05	1.5608e-05	4.65292e-05	0.000114258	0.00964481	1.74e-05	1.71e-05	1.25e-05	0.000514347	0.999889	0.000215833	0.964218	0.000103642	7.02e-05	1.62e-05	3.06e-05	2.64e-05
chrX	177	12314314	12356845	0.999792	9.10911e-05	0.0162608	5.21256e-05	1.57406e-05	3.07777e-05	2.29934e-05	1.98303e-05	2.13803e-05	1.2562e-05	3.19147e-05	2.55257e-05	9.07391e-05	2.69684e-05	0.00206211	1.76e-05	1.86e-05	1.23e-05	6.14e-05	0.99992	0.000559329	0.989853	0.000603978	8.97e-05	2.47e-05	1.85e-05	3.98e-05
chrX	178	12356846	12403386	0.999624	2.47173e-05	0.0117117	1.92355e-05	2.136e-05	5.04306e-05	1.53681e-05	1.61454e-05	2.69489e-05	1.46908e-05	1.44369e-05	9.5224e-05	6.2222e-05	4.50461e-05	0.000382013	2.17e-05	1.9e-05	1.38e-05	1.85e-05	0.999898	0.00411178	0.996326	0.000388611	3.61e-05	1.34e-05	2.09e-05	0.000217717
chrX	179	12403387	12449803	0.999751	4.76387e-05	0.0110592	1.81056e-05	2.87972e-05	9.54967e-05	2.97013e-05	4.46012e-05	0.000114239	2.86077e-05	1.2475e-05	0.000447597	7.93135e-05	4.06744e-05	0.000324971	4.23e-05	2.08e-05	1.74e-05	2.27e-05	0.999888	0.0246498	0.998988	0.000169426	3.91e-05	1.23e-05	8.13e-05	0.000896442
chrX	180	12449804	12508278	0.999595	6.81372e-05	0.00941024	1.35111e-05	0.000113966	4.19715e-05	0.000105876	0.00028533	0.000670894	3.76947e-05	1.24379e-05	0.00188827	0.000282874	0.000119252	0.00131949	1.68e-05	5.68e-05	1.34e-05	9.88e-05	0.999867	0.082725	0.999635	4.77e-05	7.13e-05	1.25e-05	0.000443414	0.000961908
chrX	181	12508279	12578918	0.998925	0.000196035	0.00827743	1.92208e-05	0.000121116	8.9775e-05	3.40861e-05	0.000380736	0.00435647	0.000125111	1.27689e-05	0.00167829	0.000800407	7.06918e-05	0.00986017	2.72e-05	3.57e-05	1.92e-05	3.11e-05	0.999726	0.106908	0.999795	1.93e-05	0.000182515	1.61e-05	0.000104364	0.000105134
chrX	182	12578919	12640887	0.999677	0.00110203	0.0114996	1.45366e-05	0.000560444	0.000716959	2.48636e-05	0.00166742	0.0335388	6.95963e-05	1.76202e-05	0.00155803	0.00210047	8.49278e-05	0.0905946	4.41e-05	7.47e-05	1.42e-05	1.51e-05	0.999867	0.28577	0.999854	3.14e-05	0.000581265	1.96e-05	0.000151997	2.18e-05
chrX	183	12640888	12695914	0.999868	0.00633789	0.0148196	2.82659e-05	0.00489194	0.00282006	4.6798e-05	0.00178329	0.157362	0.000270456	4.39915e-05	0.00169038	0.00345487	0.000123869	0.16798	0.000218317	0.000539125	1.43e-05	1.39e-05	0.999923	0.589006	0.999888	0.000175462	0.00321672	3.98e-05	0.000540206	1.51e-05
chrX	184	12695915	12751878	0.999922	0.00729683	0.0144252	0.000158998	0.00544118	0.00284401	4.98121e-05	0.000206842	0.367211	0.000293966	0.000186969	0.00199966	0.00342543	0.000677266	0.1868	8.91e-05	0.000427517	2.31e-05	2.37e-05	0.99994	0.833932	0.999835	0.000588087	0.00345746	0.000140917	0.000253473	2.26e-05
chrX	185	12751879	12808839	0.999934	0.00546025	0.0197609	0.000199639	0.00362353	0.000937903	2.08145e-05	6.44617e-05	0.42356	0.0012588	3.41412e-05	0.00301953	0.000971052	0.000273671	0.311006	4.7e-05	9.3e-05	3.46e-05	2.24e-05	0.999947	0.902048	0.999602	0.000986919	0.00239128	4.39e-05	3.59e-05	3.81e-05
chrX	186	12808840	12862731	0.999948	0.00434131	0.0316984	0.000329233	0.00151055	0.000242221	4.11777e-05	0.00013747	0.436266	0.000873002	3.60111e-05	0.0133548	0.000414553	0.000155821	0.745939	0.0001254	5.12e-05	0.000100929	6.41e-05	0.999948	0.923006	0.998764	0.00123615	0.00253605	1.88e-05	1.49e-05	1.63e-05
chrX	187	12862732	12909164	0.999951	0.0020672	0.0337094	0.00032775	0.000176992	0.000135519	3.07466e-05	2.45013e-05	0.433091	0.000106503	0.000190097	0.119338	0.00027343	6.06449e-05	0.859588	5.25e-05	7.13e-05	2.42e-05	8e-05	0.99995	0.928139	0.995563	0.000154569	0.000613384	1.52e-05	1.44e-05	2.66e-05
chrX	188	12909165	12961296	0.999947	0.00201671	0.0300251	0.00016185	6.30196e-05	0.000143685	1.54803e-05	1.35825e-05	0.408605	3.20054e-05	0.00101894	0.145716	5.94674e-05	2.13648e-05	0.88713	2.66e-05	2.41e-05	1.39e-05	2.54e-05	0.999952	0.925678	0.985313	3.29e-05	0.000195877	1.5e-05	2.03e-05	1.76e-05
chrX	189	12961297	13014337	0.999928	0.00427108	0.034856	3.50898e-05	2.76237e-05	0.0002445	2.42823e-05	1.37142e-05	0.321201	4.45948e-05	0.000649471	0.153152	0.000110669	1.5254e-05	0.892895	5.23e-05	2.48e-05	1.54e-05	5.97e-05	0.999951	0.912113	0.971187	1.76e-05	6.1e-05	1.78e-05	1.57e-05	1.77e-05
chrX	190	13014338	13084484	0.99994	0.0212312	0.0574241	5.64468e-05	5.49558e-05	0.000927955	7.84492e-05	2.61525e-05	0.307487	0.000303616	0.00102232	0.150474	0.000732504	3.16332e-05	0.890404	0.000156704	5.75e-05	3.38e-05	0.000464443	0.999947	0.91173	0.970467	4.18e-05	3.24e-05	6.44e-05	3.99e-05	6.15e-05
chrX	191	13084485	13134876	0.999946	0.0280231	0.065386	0.000224812	2.27761e-05	0.000449686	0.00015396	2.45786e-05	0.262392	0.000343331	0.000242679	0.132516	0.000387194	2.29643e-05	0.874831	0.000116561	3.39e-05	1.65e-05	6.4e-05	0.999946	0.905504	0.971457	7e-05	4.44e-05	1.76e-05	3.09e-05	2.82e-05
chrX	192	13134877	13194441	0.99995	0.0397112	0.0781806	0.00203972	6.32636e-05	0.000152183	0.000160997	1.8392e-05	0.0770898	0.0015128	4.21965e-05	0.0636311	6.58012e-05	2.20418e-05	0.815608	2.69e-05	6.34e-05	3.32e-05	4.27e-05	0.999948	0.883224	0.9735	3.59e-05	0.00010481	1.32e-05	5.68e-05	2.08e-05
chrX	193	13194442	13240469	0.999942	0.0697324	0.211199	0.00431757	9.97313e-05	0.000251284	0.000394208	5.82707e-05	0.0581423	0.00817453	3.86465e-05	0.0420501	2.39802e-05	8.58733e-05	0.777805	4.29e-05	4.42e-05	0.000178341	0.000216515	0.999942	0.806874	0.992634	0.000109612	0.000358555	1.72e-05	6.25e-05	6.43e-05
chrX	194	13240470	13295382	0.999909	0.110145	0.245762	0.00629255	0.000101806	0.00174137	0.00102413	0.000477958	0.0498238	0.00957848	0.000219717	0.0363789	6.4892e-05	0.000219106	0.759198	6.44e-05	1.57e-05	2.98e-05	0.000236151	0.999939	0.530734	0.997854	0.00092472	5.23e-05	3.22e-05	1.91e-05	0.000219459
chrX	195	13295383	13352412	0.999909	0.120778	0.252628	0.00557955	0.000517664	0.00189891	0.00128291	0.000348013	0.0409336	0.00879718	0.000688764	0.030237	0.000482967	0.00078463	0.688223	1.8e-05	1.45e-05	1.81e-05	0.000366768	0.999916	0.489689	0.999353	0.00292837	2.87e-05	0.000133149	2.53e-05	0.000170658
chrX	196	13352413	13419702	0.999849	0.120558	0.247298	0.000741265	8.83036e-05	0.000266278	0.000194282	4.70795e-05	0.00436994	0.00367338	0.000218085	0.00383938	7.14698e-05	0.000387745	0.435589	1.81e-05	3.17e-05	1.87e-05	0.000370347	0.999839	0.490356	0.999774	0.00293473	5.33e-05	3.01e-05	1.45e-05	3.62e-05
chrX	197	13419703	13472766	0.999729	0.120683	0.259974	0.000304958	3.1462e-05	8.85202e-05	0.000119683	2.31628e-05	0.000809303	0.00171721	0.000125514	0.000882004	3.28007e-05	0.000444232	0.409762	1.49e-05	3.41e-05	3.54e-05	0.00108248	0.999851	0.491791	0.999858	0.000567057	0.00028844	1.61e-05	1.41e-05	3.66e-05
chrX	198	13472767	13532748	0.999891	0.11763	0.273761	0.000218956	7.04947e-05	0.000188071	0.00031977	3.4284e-05	0.00020062	0.00120039	0.000334871	0.000170185	6.87668e-05	0.000478666	0.409364	3.43e-05	0.000141066	2.02e-05	0.00181956	0.999921	0.551319	0.999915	0.000386836	0.0012225	3.22e-05	2.87e-05	4.99e-05
chrX	199	13532749	13584445	0.999917	0.130336	0.36082	0.000715043	0.000478269	0.000985427	0.0010777	0.000200672	4.23235e-05	0.00171956	0.000727515	0.000145356	2.40357e-05	0.000641565	0.42453	0.000191319	0.000252322	2.93e-05	0.00121763	0.999944	0.703285	0.99992	0.00107759	0.00473613	7.62e-05	8.13e-05	0.000332781
chrX	200	13584446	13633565	0.999897	0.164142	0.582175	0.000216416	0.000230302	0.000744792	0.000667149	0.000194373	2.91932e-05	0.00119004	0.000126086	5.02037e-05	1.70942e-05	0.000206025	0.428015	0.0004073	0.000814597	0.000119746	0.000418231	0.999944	0.745715	0.999885	0.00200293	0.00499874	5.76e-05	0.000212324	0.000616054
chrX	201	13633566	13690905	0.999795	0.188034	0.828176	7.88334e-05	0.000155651	0.000348698	0.000106874	0.000451444	5.25465e-05	0.000456917	7.39806e-05	4.11216e-05	2.69344e-05	6.80036e-05	0.481433	8.66e-05	0.000301518	2.3e-05	5.76e-05	0.999944	0.756267	0.999743	0.00336137	0.00322843	2.16e-05	4.13e-05	9.77e-05
chrX	202	13690906	13741212	0.999352	0.206943	0.946499	5.26139e-05	0.000608386	8.29682e-05	3.97346e-05	0.000183392	3.5665e-05	6.26704e-05	3.49972e-05	5.75904e-05	1.84973e-05	6.69385e-05	0.493199	5.01e-05	5.68e-05	1.55e-05	3.7e-05	0.999944	0.758425	0.999255	0.00306648	0.00220155	1.95e-05	1.87e-05	3.92e-05
chrX	203	13741213	13823803	0.999676	0.21459	0.97904	0.000268282	0.00170407	3.95195e-05	0.000138636	3.21217e-05	3.67554e-05	2.55275e-05	3.17233e-05	7.60884e-05	5.49516e-05	8.31726e-05	0.508926	0.000175585	8.29e-05	1.38e-05	3.08e-05	0.999924	0.815542	0.999761	0.000343391	0.00108015	3.79e-05	2.35e-05	0.000143835
chrX	204	13823804	13890018	0.999788	0.213878	0.98848	0.000288544	0.00886788	2.07975e-05	0.000141279	2.89215e-05	0.000106684	5.3105e-05	7.69325e-05	0.000107	3.60512e-05	3.15305e-05	0.50883	3.97e-05	8.29e-05	1.43e-05	2.69e-05	0.999866	0.856503	0.999871	8.28e-05	0.000676676	1.83e-05	1.91e-05	9.22e-05
chrX	205	13890019	13986092	0.999801	0.196846	0.990506	0.000224413	0.0198482	6.1486e-05	6.9367e-05	3.79729e-05	0.000183846	3.69571e-05	0.000188161	0.000288186	5.45568e-05	0.000101683	0.494998	3.2e-05	0.000514486	1.28e-05	0.000119494	0.999649	0.865851	0.999873	2.04e-05	0.000123325	1.66e-05	1.67e-05	5.75e-05
chrX	206	13986093	14047785	0.999732	0.194779	0.989889	0.000363396	0.031518	0.000162582	0.000210273	7.38097e-05	0.000205481	0.000166553	0.000705667	0.000903004	0.000183809	0.000270596	0.454735	0.000161196	0.00498174	1.31e-05	0.000316738	0.998853	0.870927	0.999852	2.1e-05	4.34e-05	2.83e-05	4.67e-05	2.68e-05
chrX	207	14047786	14107107	0.999757	0.193211	0.984887	0.000298446	0.0406578	0.000765668	0.00105422	2.40291e-05	0.000110713	0.000865557	0.00128407	0.00162561	0.00116983	0.00114305	0.425238	0.000106034	0.0238665	1.3e-05	0.000660959	0.996161	0.865696	0.999659	5.14e-05	5.49e-05	4.82e-05	3.92e-05	6.03e-05
chrX	208	14107108	14231925	0.9995	0.176136	0.972345	0.000188861	0.0411816	0.000705493	0.00149842	2.21975e-05	0.0003905	0.000462014	0.000620599	0.00150064	0.000852895	0.000857302	0.403838	0.000440117	0.218683	1.65e-05	0.00101828	0.996225	0.878541	0.999655	4.57e-05	0.000310153	0.000157708	0.000201151	0.00014636
chrX	209	14231926	14297130	0.999584	0.133943	0.950057	0.000273808	0.0391387	0.000680166	0.00147066	2.443e-05	0.00142083	0.000266956	0.000297578	0.00140913	0.000302848	0.000564954	0.351055	0.000570297	0.413384	1.33e-05	0.000273716	0.998866	0.965772	0.999857	4.01e-05	0.000361405	6.32e-05	0.000159121	2.84e-05
chrX	210	14297131	14355349	0.99928	0.058399	0.862123	0.000245264	0.0295369	0.000100238	0.00096786	9.10998e-05	0.00101271	0.000316916	0.000646137	0.00421495	0.000394304	0.000618225	0.158837	0.00061093	0.675986	1.9e-05	9.74e-05	0.999647	0.990355	0.999921	2.57e-05	0.000973797	0.000207963	0.000119198	3.1e-05
chrX	211	14355350	14415670	0.999778	0.0343317	0.646112	0.000277738	0.00316586	3.99548e-05	0.000287598	9.79133e-05	0.000873362	0.000200979	0.000790877	0.00681841	0.000343794	0.000467666	0.0162232	0.000131781	0.741173	1.34e-05	0.000163535	0.999869	0.997283	0.99994	2.54e-05	0.00106078	5.19e-05	3.12e-05	0.000138697
chrX	212	14415671	14475355	0.999899	0.00426227	0.584754	0.00156074	0.000548616	4.96175e-05	7.79502e-05	0.000118663	9.82548e-05	5.95815e-05	0.000738849	0.00922057	0.000101564	0.000125446	0.00239375	8.65e-05	0.758518	1.76e-05	2.73e-05	0.999925	0.999141	0.99994	2.07e-05	0.00130561	2.79e-05	6.76e-05	0.000126673
chrX	213	14475356	14524418	0.999938	0.00135885	0.57643	0.00555485	9.17503e-05	0.000122739	3.42419e-05	2.9933e-05	2.51765e-05	9.80024e-05	0.00229659	0.0183213	2.86606e-05	2.60531e-05	0.000790085	4.58e-05	0.760212	2.65e-05	1.54e-05	0.999942	0.99967	0.999949	1.32e-05	0.000919604	1.39e-05	8.25e-05	0.000681854
chrX	214	14524419	14582032	0.999944	0.000789539	0.589663	0.0395342	6.79568e-05	0.000653888	4.78153e-05	3.66067e-05	4.51329e-05	0.000386654	0.0185789	0.112496	6.55377e-05	2.75315e-05	0.000705631	7.31e-05	0.786936	2.25e-05	2.8e-05	0.999941	0.999738	0.999949	1.37e-05	0.00156231	1.42e-05	0.000478859	0.00108737
chrX	215	14582033	14642290	0.999945	0.000406575	0.586419	0.11619	0.000315088	0.00519101	5.82291e-05	1.47954e-05	2.42993e-05	0.00115054	0.127693	0.743748	0.000170474	0.000141916	0.000137279	3.48e-05	0.792625	2.39e-05	0.000171128	0.999942	0.999575	0.999946	1.56e-05	0.00460493	2.89e-05	0.000329407	0.000394648
chrX	216	14642291	14698373	0.999947	0.000357814	0.579509	0.744157	0.000358267	0.00952617	3.7088e-05	1.40118e-05	1.80746e-05	0.00171668	0.236656	0.921641	7.13973e-05	5.22766e-05	0.000100808	1.48e-05	0.81664	3.77e-05	0.000152079	0.999941	0.999839	0.999945	1.36e-05	0.0077003	1.96e-05	7.36e-05	0.000141766
chrX	217	14698374	14745527	0.999951	0.000276899	0.585956	0.926587	0.000462519	0.01097	7.37218e-05	2.63539e-05	1.47888e-05	0.00403063	0.618167	0.977085	0.000166545	5.56523e-05	0.000324942	1.6e-05	0.821151	2.55e-05	7.41e-05	0.999944	0.999915	0.99995	2.13e-05	0.00793363	1.55e-05	6.52e-05	5.74e-05
chrX	218	14745528	14789130	0.999948	0.000357879	0.64634	0.97926	0.000829416	0.0143255	0.000447575	6.44447e-05	2.36628e-05	0.00453174	0.892234	0.99261	0.00117661	0.000270145	0.000813543	1.61e-05	0.822116	9.75e-05	0.000243588	0.999943	0.999924	0.999947	5.15e-05	0.00758242	1.68e-05	3.14e-05	0.000161699
chrX	219	14789131	14827767	0.99995	0.000443466	0.67018	0.994104	0.000211094	0.013538	0.000117575	2.82268e-05	3.81093e-05	0.00287405	0.971858	0.996958	0.00106592	0.000168795	0.000206077	3.57e-05	0.810875	0.000358885	0.000209125	0.999941	0.999899	0.999951	2.15e-05	0.00478433	1.33e-05	1.81e-05	6.2e-05
chrX	220	14827768	14889793	0.999946	0.000233182	0.904282	0.998088	7.40654e-05	0.017289	0.000110161	1.85882e-05	1.51622e-05	0.00175155	0.992033	0.998081	0.00280599	0.00021595	0.000236164	2.46e-05	0.761586	0.00102442	3.15e-05	0.999941	0.999838	0.999946	2.84e-05	0.00342761	1.9e-05	4.97e-05	4.97e-05
chrX	221	14889794	14948659	0.999944	0.000433019	0.972291	0.999187	0.000229263	0.027622	5.62222e-05	1.90114e-05	1.46831e-05	0.000648176	0.997719	0.998062	0.00449911	7.88359e-05	0.000379592	0.000104654	0.759304	0.0067229	1.43e-05	0.999942	0.999605	0.999945	2.22e-05	0.00439477	3.32e-05	0.00038941	5.64e-05
chrX	222	14948660	15018533	0.999943	0.00234003	0.991452	0.999413	0.000359664	0.0296774	0.000153147	2.76528e-05	1.48063e-05	0.000576251	0.999322	0.996863	0.00406942	0.000179322	0.000188085	2.89e-05	0.740521	0.00796581	1.36e-05	0.99994	0.998767	0.999946	1.99e-05	0.00405132	2.68e-05	6.51e-05	0.000167785
chrX	223	15018534	15075269	0.999944	0.00272044	0.996973	0.999189	0.000710972	0.0265248	0.00018354	4.447e-05	3.31681e-05	0.000688645	0.999749	0.992492	0.00159253	0.000139325	4.64125e-05	5.39e-05	0.673806	0.00679343	2.55e-05	0.999934	0.995942	0.999944	7.78e-05	0.00733649	3.85e-05	7.52e-05	0.00011582
chrX	224	15075270	15128348	0.999943	0.00142424	0.998482	0.998096	0.00115263	0.0107683	3.12147e-05	0.000280019	0.000103066	0.000137039	0.999854	0.977262	0.000258911	0.000566512	9.99412e-05	0.00019141	0.416256	0.000839633	1.39e-05	0.999919	0.986887	0.999942	8.28e-05	0.00815888	0.000101093	0.000220159	9.87e-05
chrX	225	15128349	15185938	0.999941	0.000605207	0.99874	0.994433	0.00069839	0.00456485	2.27391e-05	5.85593e-05	0.000137516	0.000183301	0.999831	0.976934	0.000203134	0.000335563	0.000178083	0.000212077	0.325509	0.000139078	1.55e-05	0.999857	0.955515	0.999937	0.000537125	0.00631171	0.000409651	0.000617201	7.74e-05
chrX	226	15185939	15273146	0.999943	0.000896854	0.998139	0.980767	9.82377e-05	0.00096621	5.80982e-05	7.36691e-05	0.000241365	3.23473e-05	0.999629	0.990979	7.17096e-05	0.000330288	0.000466611	0.000117727	0.183544	2.82e-05	2.28e-05	0.999677	0.844186	0.999943	9.35e-05	0.00367604	0.000134155	0.000427883	4.71e-05
chrX	227	15273147	15335968	0.999942	0.000364502	0.995709	0.924115	2.98463e-05	0.000674534	3.81568e-05	2.40379e-05	3.56194e-05	3.16718e-05	0.999838	0.997387	2.68949e-05	0.000371658	0.000453409	0.000386627	0.146428	1.38e-05	1.79e-05	0.998972	0.463333	0.999939	3.83e-05	0.0033137	0.00024377	0.000237396	4.38e-05
chrX	228	15335969	15407532	0.999938	0.000128278	0.986925	0.723109	3.32217e-05	0.00154338	4.37527e-05	1.75682e-05	1.61359e-05	0.000113245	0.999877	0.99924	8.18586e-05	0.000501802	7.9977e-05	4.93e-05	0.0180954	1.31e-05	2.39e-05	0.996665	0.110315	0.999926	1.5e-05	0.00037732	4.36e-05	3.73e-05	1.59e-05
chrX	229	15407533	15458832	0.999926	0.000164791	0.960249	0.120269	2.57255e-05	0.00318196	6.77807e-05	5.27899e-05	1.61863e-05	0.000351015	0.999894	0.99972	5.78064e-05	0.000222314	9.74791e-05	1.78e-05	0.00242387	1.99e-05	0.000124292	0.996902	0.0324312	0.999942	1.56e-05	7.16e-05	1.79e-05	1.64e-05	1.79e-05
chrX	230	15458833	15523862	0.999946	0.000206791	0.879225	0.0603176	0.000119606	0.00563777	8.92071e-05	2.56505e-05	1.63342e-05	0.00161808	0.999921	0.999891	0.000161382	0.000348139	7.05455e-05	2.65e-05	0.000275402	1.43e-05	0.000865108	0.996966	0.00489666	0.999943	1.7e-05	5.85e-05	1.46e-05	2.53e-05	2.19e-05
chrX	231	15523863	15568452	0.999948	0.000601574	0.559482	0.0216447	0.000242565	0.0127547	3.70724e-05	1.38365e-05	1.30441e-05	0.00513195	0.999944	0.999937	0.00118293	0.000752121	6.68699e-05	3.86e-05	7.27e-05	1.75e-05	0.00713832	0.998513	0.000564176	0.999947	2.84e-05	0.000283633	1.92e-05	4.74e-05	7.59e-05
chrX	232	15568453	15647599	0.999937	0.00493491	0.322451	0.0126362	0.000439932	0.0765145	7.73005e-05	1.26236e-05	1.72072e-05	0.0410854	0.999947	0.999948	0.00372847	0.000952328	2.42392e-05	5.56e-05	2.5e-05	1.38e-05	0.0290457	0.998813	0.000164081	0.999944	0.000135836	0.000481238	1.33e-05	3.29e-05	0.000147199
chrX	233	15647600	15722606	0.999896	0.00548026	0.281996	0.0100109	0.000292383	0.122093	3.45957e-05	1.46984e-05	1.28193e-05	0.111181	0.999945	0.999947	0.00921164	0.00167064	4.0212e-05	3.26e-05	2.44e-05	1.99e-05	0.0623154	0.999517	0.000121943	0.999947	3.92e-05	0.000680466	1.38e-05	2.06e-05	4.04e-05
chrX	234	15722607	15811047	0.999779	0.0080155	0.271994	0.00371574	0.000109914	0.132068	0.000129545	1.75197e-05	1.40682e-05	0.130885	0.999944	0.999945	0.00994495	0.000944894	0.000212593	5.95e-05	1.59e-05	8.93e-05	0.159134	0.9998	0.000174367	0.999946	0.000106165	0.00373485	1.86e-05	2.51e-05	6.5e-05
chrX	235	15811048	15869736	0.999889	0.0102303	0.270301	0.00150038	9.63861e-05	0.131509	2.60726e-05	4.08097e-05	2.90804e-05	0.133855	0.999944	0.999944	0.01214	0.00135512	0.000788062	3.28e-05	2.71e-05	0.000263251	0.329415	0.999905	0.00033946	0.999944	5.76e-05	0.0132152	2.99e-05	0.000100486	6.82e-05
chrX	236	15869737	16000214	0.999907	0.00908609	0.26534	0.000371947	9.48132e-05	0.118175	1.92291e-05	3.2959e-05	0.000113323	0.136378	0.999944	0.999943	0.0120027	0.000396746	0.000330413	0.00014034	0.000160461	4.16e-05	0.376935	0.999936	0.000325557	0.999941	0.000143746	0.0148353	0.000186032	0.000184825	0.000149184
chrX	237	16000215	16057696	0.999865	0.006903	0.268912	0.000429334	0.000269243	0.110142	1.51689e-05	7.79894e-05	3.56594e-05	0.164257	0.999943	0.999942	0.0219078	0.000414086	0.000203496	4.97e-05	8.98e-05	2.32e-05	0.397594	0.999944	0.000167447	0.999936	2.59e-05	0.0358633	0.000138113	6.85e-05	2.92e-05
chrX	238	16057697	16109985	0.999693	0.00622694	0.302379	0.00106532	0.000247998	0.113566	3.3096e-05	2.113e-05	2.72009e-05	0.200849	0.999943	0.999939	0.0238622	0.000227514	0.000126494	7.08e-05	9.25e-05	2.78e-05	0.399425	0.999939	0.000378258	0.999907	1.91e-05	0.0558647	5.36e-05	2.87e-05	3.53e-05
chrX	239	16109986	16166346	0.999073	0.00371817	0.310134	0.00167487	7.58096e-05	0.167424	0.000132334	1.97545e-05	0.000110538	0.237319	0.99994	0.999931	0.0256224	0.000254282	0.00015092	7.31e-05	0.000496728	0.000118891	0.385763	0.999948	0.00290505	0.999816	5.2e-05	0.061703	2.15e-05	9.87e-05	0.000138663
chrX	240	16166347	16247473	0.99761	0.00424597	0.304641	0.00245405	0.000148255	0.480256	2.89735e-05	5.19329e-05	3.14443e-05	0.276219	0.999944	0.9999	0.0328419	0.00133817	3.9277e-05	7.93e-05	0.000875243	0.000105075	0.325811	0.999946	0.00292983	0.999436	2.15e-05	0.0600328	5.38e-05	5.37e-05	3.8e-05
chrX	241	16247474	16304214	0.996798	0.0081354	0.276337	0.00208534	0.000509978	0.564119	2.2179e-05	4.32913e-05	4.35052e-05	0.38747	0.999947	0.999789	0.0562304	0.00287336	9.36339e-05	9.82e-05	0.00188431	0.000165041	0.114306	0.999948	0.00089403	0.997927	5.84e-05	0.0717171	0.000123726	2.19e-05	9.46e-05
chrX	242	16304215	16402758	0.997715	0.0180899	0.231394	0.000554837	0.00064696	0.58695	1.94796e-05	5.1105e-05	2.98278e-05	0.416616	0.99995	0.999407	0.0632957	0.00276746	0.00028819	2.86e-05	0.0058507	0.000291301	0.094074	0.999947	0.000715794	0.999278	0.000185844	0.123095	8.54e-05	2.9e-05	3.07e-05
chrX	243	16402759	16468241	0.998157	0.0398044	0.216437	0.000566648	0.000764006	0.670395	7.48045e-05	0.000188298	7.9268e-05	0.446678	0.999944	0.998049	0.0701829	0.0038492	0.000390765	6.43e-05	0.0197488	0.000656256	0.0196687	0.999944	0.00148815	0.999644	5.03e-05	0.619513	0.000153125	0.000114925	5.18e-05
chrX	244	16468242	16547401	0.998273	0.067084	0.222854	0.000412126	0.000736295	0.779815	0.000405401	0.000142819	2.0742e-05	0.452469	0.999945	0.993378	0.0691753	0.00816554	0.00202877	5.27e-05	0.108343	0.000143148	0.0106834	0.999945	0.00494882	0.999651	0.000113816	0.898776	3.6e-05	0.000574843	0.000312729
chrX	245	16547402	16600668	0.999267	0.101426	0.221101	0.00134428	0.00182962	0.829284	0.00159106	2.86622e-05	2.7189e-05	0.446486	0.999946	0.976798	0.0754358	0.00939702	0.00233542	3.37e-05	0.301553	6.35e-05	0.0047261	0.999947	0.0147157	0.999322	4.82e-05	0.973883	7.09e-05	9.43e-05	5.27e-05
chrX	246	16600669	16653067	0.999753	0.109029	0.202878	0.000892839	0.00140651	0.84283	0.00149584	1.4232e-05	0.000137693	0.413784	0.999945	0.915142	0.073585	0.00757911	0.00656929	0.00010863	0.723114	3.98e-05	0.00474227	0.999946	0.114102	0.998104	3.29e-05	0.992	2.7e-05	9.62e-05	6.14e-05
chrX	247	16653068	16709423	0.999891	0.106521	0.136835	0.000461244	0.000440602	0.843275	0.000199883	1.68884e-05	0.00061905	0.312404	0.999947	0.693745	0.0609578	0.00672274	0.0442519	0.000868768	0.925861	1.49e-05	0.0018914	0.999946	0.16162	0.993232	2.7e-05	0.997091	6.77e-05	5.32e-05	1.95e-05
chrX	248	16709424	16758373	0.99993	0.0890317	0.121913	0.000490753	0.000111021	0.835895	4.35835e-05	5.80015e-05	0.00023667	0.131834	0.999945	0.504072	0.0115011	0.00154851	0.432736	0.000800057	0.978286	1.3e-05	0.00194421	0.999943	0.221578	0.991387	2.31e-05	0.998545	4.36e-05	7.74e-05	2.38e-05
chrX	249	16758374	16818654	0.999942	0.0752407	0.118994	0.000327413	0.000127865	0.824726	2.23333e-05	2.39646e-05	4.91102e-05	0.113242	0.999944	0.369977	0.00196215	0.00111308	0.851837	0.000136444	0.993054	1.72e-05	0.00511528	0.999936	0.661248	0.991385	2.16e-05	0.998754	0.000196833	1.93e-05	0.000103424
chrX	250	16818655	16887699	0.99995	0.0727746	0.117968	0.000277206	0.00052694	0.79979	6.31533e-05	7.15819e-05	4.93665e-05	0.0868141	0.999944	0.335229	0.000955775	0.0021644	0.957986	7.6e-05	0.996619	2.31e-05	0.0285962	0.999892	0.908593	0.994676	5.88e-05	0.999641	0.000325877	1.8e-05	5.06e-05
chrX	251	16887700	16932462	0.999948	0.0717906	0.109935	0.000292406	0.000179601	0.701913	2.83753e-05	0.000127589	0.000194689	0.0209912	0.999946	0.241881	0.00085097	0.00159085	0.98902	0.000351825	0.99768	1.84e-05	0.144523	0.999929	0.975113	0.99846	2.15e-05	0.999864	0.000259898	1.93e-05	0.000201349
chrX	252	16932463	16989287	0.999942	0.0641532	0.094117	0.000159547	9.2044e-05	0.316664	2.64071e-05	0.000214583	0.000166344	0.011157	0.999947	0.144587	0.00128056	0.00150322	0.996911	7.17e-05	0.997423	2.71e-05	0.23798	0.999945	0.993105	0.999526	5.12e-05	0.999924	0.000133929	7.9e-05	0.000278795
chrX	253	16989288	17055797	0.99993	0.0603081	0.033095	0.00014341	0.000307497	0.270029	7.83864e-05	0.000201267	0.000674427	0.0109054	0.999945	0.061093	0.00180648	0.00394649	0.999095	3.03e-05	0.995429	0.000120061	0.260968	0.999944	0.997969	0.99982	0.000181462	0.999936	0.000100855	3.04e-05	0.000162541
chrX	254	17055798	17123052	0.999893	0.0405658	0.0136062	0.000186891	5.35381e-05	0.10397	0.000257775	0.000179695	0.000474355	0.00663068	0.999944	0.0316565	0.000876959	0.0068767	0.999712	4.54e-05	0.987871	0.000242187	0.26567	0.999944	0.999335	0.999909	0.000206056	0.999935	9.16e-05	2.63e-05	4.79e-05
chrX	255	17123053	17188453	0.99976	0.00932758	0.00464801	3.492e-05	5.50829e-05	0.0855381	0.00025527	5.17152e-05	7.03955e-05	0.00215455	0.999942	0.00392001	0.000556161	0.00970681	0.999886	7.23e-05	0.958718	5.53e-05	0.2581	0.999949	0.999704	0.999935	8.42e-05	0.999918	3.49e-05	2.45e-05	0.000102224
chrX	256	17188454	17242242	0.999201	0.00107452	0.00147575	2.0053e-05	1.67132e-05	0.00912403	0.000320206	2.46491e-05	4.76343e-05	0.00035027	0.99994	0.00053394	0.000444961	0.0102836	0.999935	0.00010388	0.846581	2.88e-05	0.219209	0.999945	0.999716	0.999941	2.6e-05	0.999842	1.44e-05	3.13e-05	6.95e-05
chrX	257	17242243	17299323	0.998464	0.000290214	0.00139678	5.32951e-05	1.49696e-05	0.00103796	0.000278743	8.45249e-05	2.27639e-05	0.000246488	0.99992	0.000243802	0.000166027	0.0107243	0.99994	0.000131841	0.460609	1.58e-05	0.063862	0.999948	0.999376	0.999945	1.68e-05	0.999586	1.28e-05	0.000129363	2.49e-05
chrX	258	17299324	17348062	0.999521	0.000178275	0.00117272	4.79975e-05	3.38801e-05	0.000209643	9.01485e-05	4.68284e-05	4.10098e-05	5.97343e-05	0.999853	0.000208862	0.000217879	0.0117303	0.999941	0.00014188	0.36993	2.22e-05	0.0339959	0.999951	0.998172	0.999948	4.46e-05	0.998627	1.37e-05	4.09e-05	3.6e-05
chrX	259	17348063	17411869	0.999831	6.06082e-05	0.000573128	2.65319e-05	0.000107718	7.30589e-05	3.51165e-05	0.000178134	4.11048e-05	0.000131383	0.999599	0.000687304	0.000169442	0.0134237	0.999943	0.000140427	0.180896	4.79e-05	0.00838943	0.999945	0.993717	0.99995	1.91e-05	0.995226	2.48e-05	3.86e-05	3.41e-05
chrX	260	17411870	17480621	0.999913	8.90468e-05	0.000355962	7.71066e-05	5.04931e-05	2.69373e-05	1.9495e-05	0.000159369	0.00016291	4.43837e-05	0.998729	0.00115248	0.000211123	0.0149185	0.99994	0.000288921	0.106469	2.19e-05	0.00518654	0.99994	0.977716	0.999947	4.42e-05	0.983015	0.000126482	3.01e-05	0.00013397
chrX	261	17480622	17559581	0.999936	0.000299304	0.000129294	7.33212e-05	2.03826e-05	5.43729e-05	1.52039e-05	2.88929e-05	0.000122346	4.61499e-05	0.99574	0.000479537	4.88088e-05	0.0162153	0.999945	0.000690359	0.0140871	1.36e-05	0.00188984	0.999926	0.922355	0.999949	1.55e-05	0.939686	0.000187727	3.81e-05	2.99e-05
chrX	262	17559582	17618683	0.999941	0.000823087	0.00017362	0.00011462	2.11886e-05	2.15316e-05	1.51427e-05	2.65286e-05	3.55618e-05	8.88259e-05	0.984741	9.26123e-05	0.000100239	0.0258688	0.999943	0.000763733	0.00510773	1.48e-05	0.000876098	0.999873	0.916754	0.999946	1.5e-05	0.789623	6.61e-05	0.000238751	1.89e-05
chrX	263	17618684	17674557	0.999938	0.000779488	0.000899879	2.75105e-05	1.56807e-05	1.67926e-05	3.98141e-05	9.13937e-05	9.47095e-05	3.64598e-05	0.946887	0.000131847	0.000119221	0.0405691	0.999944	0.000610875	0.00226245	2.87e-05	0.000107632	0.999686	0.916319	0.999945	1.6e-05	0.212509	0.000104787	0.000167228	1.96e-05
chrX	264	17674558	17744174	0.999913	0.000249522	0.000592551	1.84035e-05	3.46155e-05	2.02413e-05	7.53642e-05	5.56265e-05	0.000300025	0.000134421	0.794054	0.000163266	0.000184267	0.0550818	0.999944	0.000797756	0.0014325	9.89e-05	4.81e-05	0.999026	0.910475	0.999947	4.88e-05	0.0475703	0.000141684	0.000206398	2.5e-05
chrX	265	17744175	17852936	0.99984	0.000171859	0.000683268	2.74303e-05	7.11816e-05	6.27041e-05	0.000421207	2.1185e-05	9.73296e-05	7.43813e-05	0.779304	8.08641e-05	6.65715e-05	0.0694129	0.999941	0.00034383	0.000349912	2.53e-05	0.000145224	0.996608	0.894617	0.99995	0.000121312	0.0227687	4.72e-05	0.000170293	7.86e-05
chrX	266	17852937	17908160	0.999773	0.000108433	0.000456303	0.000139166	9.11728e-05	0.00018708	0.000366406	5.1136e-05	4.25828e-05	0.000222222	0.784341	0.000195264	0.000159334	0.216786	0.999941	0.000729662	0.000296609	4.13e-05	4.42e-05	0.994583	0.89904	0.999947	4.98e-05	0.0208848	0.000144914	0.000126196	0.000109761
chrX	267	17908161	17955082	0.999897	0.00031655	0.000175299	6.533e-05	6.87025e-05	0.000114217	0.000107673	2.02787e-05	4.84626e-05	0.000166072	0.802311	0.000105661	4.80791e-05	0.364043	0.999937	0.000360748	0.000147986	5.87e-05	5.93e-05	0.987034	0.895641	0.999948	7.88e-05	0.0138317	5.7e-05	3.85e-05	8.12e-05
chrX	268	17955083	18015624	0.99994	0.000439239	0.000274234	0.000108478	8.24633e-05	0.000390842	0.000179895	1.98985e-05	2.21431e-05	0.000317846	0.947147	9.541e-05	0.000137828	0.792396	0.999911	0.000115999	0.00018816	5.86e-05	7.94e-05	0.961115	0.878141	0.999951	3.58e-05	0.014388	1.79e-05	3.01e-05	3.23e-05
chrX	269	18015625	18075116	0.999951	0.000104089	0.000155764	5.99636e-05	6.92204e-05	6.40491e-05	3.71398e-05	3.72681e-05	2.16641e-05	0.000678409	0.985442	0.000215969	0.000191789	0.895728	0.999807	3.31e-05	8.94e-05	2.36e-05	4.63e-05	0.959848	0.811361	0.999954	9.93e-05	0.0166165	2.32e-05	3.52e-05	7.39e-05
chrX	270	18075117	18148046	0.99995	8.566e-05	0.000117714	2.21746e-05	4.10029e-05	5.80235e-05	2.30416e-05	1.53471e-05	9.13154e-05	0.000835167	0.99556	0.000164027	0.000411515	0.922833	0.999386	2.6e-05	0.000258938	3.21e-05	0.000168242	0.962654	0.608194	0.999953	0.000222824	0.0149399	1.84e-05	2.37e-05	8.53e-05
chrX	271	18148047	18216559	0.999949	6.74484e-05	0.000168517	4.53026e-05	9.21018e-05	0.000161973	1.89034e-05	1.70545e-05	2.40628e-05	0.00085035	0.99872	0.000102508	0.000513495	0.929417	0.99973	4.01e-05	0.000304396	2.64e-05	0.000202155	0.970716	0.515302	0.999946	0.000174389	0.00660254	6.17e-05	8.51e-05	0.00019394
chrX	272	18216560	18280879	0.999945	0.00032292	0.00093128	8.1666e-05	5.01469e-05	6.19078e-05	2.22662e-05	4.52777e-05	1.97511e-05	0.000755971	0.999612	0.000157296	0.000411603	0.92875	0.999877	2.09e-05	0.00013152	2.05e-05	0.000118598	0.971955	0.184865	0.999944	0.000212349	0.00334439	2.79e-05	7.05e-05	8.73e-05
chrX	273	18280880	18336606	0.999943	0.00103875	0.00323703	0.000138834	5.86079e-05	0.000165337	0.000101913	3.55171e-05	7.50115e-05	0.000496103	0.999854	0.00011574	0.00155109	0.918992	0.999909	6.67e-05	0.000151208	2.37e-05	2.73e-05	0.968995	0.0792477	0.999944	6.6e-05	0.000935671	2.51e-05	3.79e-05	0.000192464
chrX	274	18336607	18389274	0.999946	0.00128344	0.0137294	0.000373475	0.000284125	0.00111676	4.85911e-05	0.000123709	7.42894e-05	0.000139037	0.999919	0.000586177	0.00251933	0.885041	0.999884	2.09e-05	0.000592902	3.86e-05	3.05e-05	0.956219	0.0455587	0.99995	3.92e-05	0.000697753	6.88e-05	4.91e-05	3.34e-05
chrX	275	18389275	18454909	0.999949	0.000775405	0.0201677	0.000535306	0.00107228	0.000891006	7.23228e-05	0.000842321	4.27702e-05	0.000289194	0.999939	0.000282248	0.00323168	0.763956	0.999769	2.69e-05	0.00258661	2.93e-05	2.76e-05	0.910521	0.0256838	0.999949	0.000149038	0.000906871	2.27e-05	5.97e-05	2e-05
chrX	276	18454910	18523385	0.999943	0.000583239	0.0205084	0.000282522	0.000627538	0.000212354	2.96286e-05	0.00153647	6.6426e-05	0.000342845	0.999933	0.000262126	0.00196077	0.400673	0.999379	3.78e-05	0.00636781	0.000124634	7.88e-05	0.863108	0.00478715	0.999939	0.000281733	0.00420196	3.79e-05	1.76e-05	2.45e-05
chrX	277	18523386	18603629	0.999937	0.000890188	0.018949	0.00070672	8.7709e-05	0.000120154	8.52999e-05	0.000820779	0.000293414	0.000192554	0.999929	6.46322e-05	0.000526113	0.123051	0.997907	7.54e-05	0.00847056	0.000176908	0.000133147	0.845066	0.000752521	0.999899	0.000236851	0.0080351	5.68e-05	1.68e-05	2.12e-05
chrX	278	18603630	18668604	0.999937	0.000641664	0.0170628	0.000424654	6.16256e-05	0.000231176	0.000121346	0.000114414	0.000406293	0.000692107	0.999918	6.93065e-05	0.000620966	0.0752318	0.998542	0.00015183	0.00875412	4.58e-05	6.45e-05	0.850539	0.000294333	0.999805	0.000296324	0.0485134	0.000116135	3.03e-05	1.7e-05
chrX	279	18668605	18733682	0.999923	0.00123667	0.0191013	0.0010784	0.000145184	0.00136139	3.1305e-05	4.57227e-05	0.000315256	0.00103234	0.999862	3.71443e-05	0.000511991	0.0590433	0.99938	0.000158856	0.00640254	2.23e-05	5.11e-05	0.925849	0.000257914	0.999449	0.000151837	0.0590809	2.24e-05	0.000141255	1.38e-05
chrX	280	18733683	18809628	0.99987	0.00128	0.0217902	0.000529451	4.32148e-05	0.00110508	3.49104e-05	2.2577e-05	5.11535e-05	0.000194784	0.999659	4.65472e-05	8.60064e-05	0.0085964	0.999798	4.01e-05	0.00165006	1.85e-05	7.31e-05	0.947415	9.66e-05	0.998189	0.000197864	0.0600297	1.44e-05	3.85e-05	1.25e-05
chrX	281	18809629	18882622	0.999831	0.000962494	0.0231044	0.000518861	3.14596e-05	0.00145402	2.25255e-05	5.94375e-05	4.21541e-05	0.000210801	0.999176	0.00016848	9.61551e-05	0.0017007	0.999908	4.39e-05	0.000625303	1.98e-05	1.86e-05	0.954109	0.00027734	0.996582	6.21e-05	0.0890908	1.28e-05	2.18e-05	1.24e-05
chrX	282	18882623	18948062	0.999554	0.000956669	0.0197069	0.000567925	1.71693e-05	0.00165316	2.98087e-05	1.68614e-05	0.000162808	0.000697202	0.997351	0.00020241	0.000124629	0.00102699	0.999923	0.000247875	0.000948084	7.12e-05	1.69e-05	0.953688	0.00104431	0.98999	2.64e-05	0.328529	1.68e-05	7.18e-05	1.5e-05
chrX	283	18948063	19007781	0.998567	0.000608308	0.00397007	0.000444852	1.38791e-05	0.000388286	0.00011297	1.36421e-05	0.000193373	0.000166417	0.991707	3.95239e-05	2.83614e-05	0.000174025	0.999903	0.000178378	0.000486452	3.49e-05	3e-05	0.946302	0.00221747	0.968257	3.75e-05	0.400913	2.49e-05	8.52e-05	1.91e-05
chrX	284	19007782	19069844	0.995064	0.00020163	0.000483159	0.000306824	2.25221e-05	0.000436337	0.000142996	2.27228e-05	5.01268e-05	7.11228e-05	0.972142	5.81747e-05	4.55637e-05	4.62032e-05	0.999823	3.32e-05	9.19e-05	1.68e-05	0.000138241	0.917191	0.0018289	0.889727	3.82e-05	0.420189	1.41e-05	7.46e-05	3.2e-05
chrX	285	19069845	19128451	0.983085	4.26889e-05	0.000164353	0.000352483	9.95742e-05	0.000838603	5.3627e-05	0.000118895	0.000106964	0.000147319	0.899375	0.000119005	7.41208e-05	0.000115337	0.999444	2.68e-05	9.35e-05	1.31e-05	0.000230551	0.890413	0.0042264	0.594383	0.000225066	0.423359	1.8e-05	3.44e-05	4.42e-05
chrX	286	19128452	19179583	0.937648	6.01042e-05	3.44146e-05	0.000813152	0.000687816	0.00217739	0.000149658	7.07979e-05	7.14785e-05	0.000647271	0.888821	0.000610487	0.000514371	0.000962462	0.998333	4.55e-05	0.0005867	1.66e-05	0.000202049	0.87735	0.00460132	0.228737	0.000106578	0.417133	2.89e-05	2.52e-05	3.21e-05
chrX	287	19179584	19237771	0.826086	0.000125386	4.107e-05	0.000214993	0.000512031	0.00182282	3.17368e-05	3.09662e-05	0.000147079	0.000190442	0.861353	0.000307183	7.15097e-05	0.000645147	0.994771	0.000117859	0.00463669	4.33e-05	0.000511372	0.867514	0.00254957	0.190435	3.51e-05	0.387532	5.35e-05	3.34e-05	6.67e-05
chrX	288	19237772	19299656	0.594128	3.94888e-05	1.68905e-05	0.000154618	0.000172208	0.00035792	1.45508e-05	1.43743e-05	4.45152e-05	5.71199e-05	0.839929	0.000267245	3.39876e-05	0.000124015	0.982422	5.21e-05	0.00518094	2.59e-05	7.94e-05	0.834304	0.00220229	0.0438716	2.92e-05	0.276285	1.67e-05	2.04e-05	1.87e-05
chrX	289	19299657	19372678	0.444859	0.000116099	2.02906e-05	0.000399672	0.000154549	0.000280729	1.48516e-05	1.27532e-05	8.67352e-05	0.000156269	0.753452	0.000214059	0.00013659	0.000124327	0.93122	5.37e-05	0.00351762	6.32e-05	7.28e-05	0.705433	0.00503421	0.00934446	0.000145269	0.0307268	1.39e-05	4.36e-05	1.34e-05
chrX	290	19372679	19441685	0.0502065	3.94783e-05	1.31309e-05	0.000719274	0.00011866	0.00081972	1.69344e-05	1.2906e-05	3.26392e-05	5.14e-05	0.411542	6.53325e-05	3.51666e-05	0.000557455	0.749551	4.89e-05	0.00311422	0.000163438	0.000266294	0.272535	0.00574683	0.00113764	5.73e-05	0.0047458	2.44e-05	2.34e-05	1.5e-05
chrX	291	19441686	19497109	0.0109197	7.89704e-05	1.33135e-05	0.00239283	0.000372935	0.003703	1.92453e-05	1.60769e-05	3.02749e-05	6.61003e-05	0.378185	3.59979e-05	7.51737e-05	0.00170234	0.349291	0.000158691	0.00435504	0.00117704	6.35e-05	0.227101	0.00511439	0.000366421	1.75e-05	0.000874025	1.41e-05	2.74e-05	1.86e-05
chrX	292	19497110	19568546	0.00165278	0.000185705	1.98113e-05	0.00379002	0.000406588	0.00382877	5.24859e-05	5.22275e-05	0.000163663	0.000157528	0.325407	0.000158743	0.000154296	0.00213476	0.172156	5.42e-05	0.00353119	0.011486	0.000134187	0.068442	0.000828555	5.74e-05	1.94e-05	0.00011727	1.79e-05	2.15e-05	2.13e-05
chrX	293	19568547	19644729	0.000796265	0.000327179	3.25398e-05	0.00311692	0.000145897	0.00210524	2.29224e-05	2.92074e-05	0.000208936	0.000159187	0.230986	6.72334e-05	4.84792e-05	0.00149303	0.0367159	3.22e-05	0.00194366	0.0135089	0.000431945	0.0492944	0.000263547	2.87e-05	1.36e-05	2.8e-05	1.68e-05	3.03e-05	2.39e-05
chrX	294	19644730	19715268	0.00120897	0.000676883	0.000155422	0.000609337	0.000261097	0.000609672	2.77222e-05	1.76619e-05	5.38579e-05	7.14045e-05	0.0627686	5.44332e-05	3.16734e-05	0.00072757	0.0163519	1.84e-05	0.000293034	0.0118632	0.00249461	0.0486807	9.34e-05	2.72e-05	1.7e-05	1.95e-05	1.51e-05	1.94e-05	1.91e-05
chrX	295	19715269	19773033	0.00272087	0.0026918	0.000134236	0.000451713	0.00126229	0.000704505	2.39859e-05	1.5584e-05	1.88843e-05	0.000285218	0.0464289	0.000244474	6.14211e-05	0.0013362	0.0136846	2.86e-05	0.000139227	0.00503781	0.00248041	0.0488985	0.000153825	1.54e-05	3.05e-05	2.58e-05	3.65e-05	4.99e-05	6.62e-05
chrX	296	19773034	19879739	0.00229553	0.00265891	3.76564e-05	6.98382e-05	0.000912458	0.000165155	1.34016e-05	4.06003e-05	1.31886e-05	3.94911e-05	0.00695949	4.63201e-05	3.99515e-05	0.000769694	0.00997487	3.37e-05	3.69e-05	0.00500259	0.000265021	0.0469392	8.54e-05	2.8e-05	0.000154408	8.5e-05	1.69e-05	4.88e-05	9.15e-05
chrX	297	19879740	19945951	0.000530856	0.000401151	2.07404e-05	6.68974e-05	0.000185253	3.05674e-05	1.2459e-05	1.64098e-05	1.28069e-05	1.8324e-05	0.000750864	4.07239e-05	1.63192e-05	0.000130516	0.00104712	1.96e-05	3.67e-05	0.00766404	5.09e-05	0.0347725	2.53e-05	1.39e-05	8.05e-05	1.93e-05	1.27e-05	1.64e-05	2.39e-05
chrX	298	19945952	20003979	0.00041533	0.000210266	5.29394e-05	4.51078e-05	9.07144e-05	3.23399e-05	1.34473e-05	2.5714e-05	1.70904e-05	1.56088e-05	0.000109711	1.68186e-05	2.47151e-05	3.29228e-05	0.000163286	2.15e-05	2.52e-05	0.00921887	7.28e-05	0.032411	2.13e-05	1.27e-05	0.000203332	1.34e-05	1.23e-05	1.88e-05	2.85e-05
chrX	299	20003980	20111101	0.00152481	0.000561858	0.000274394	3.2785e-05	0.000334602	0.000103795	2.31174e-05	3.22165e-05	1.85197e-05	3.11628e-05	2.21831e-05	1.99985e-05	0.000130453	1.54675e-05	0.000117458	1.85e-05	3.14e-05	0.00781025	0.000443829	0.0358323	4.26e-05	1.26e-05	0.000354371	1.56e-05	1.3e-05	2.84e-05	0.000157472
chrX	300	20111102	20210495	0.00117701	0.000156346	9.63593e-05	2.19465e-05	0.000249053	6.27348e-05	3.58949e-05	2.48848e-05	6.03353e-05	2.0293e-05	1.45535e-05	4.1946e-05	3.21629e-05	1.29228e-05	2.35494e-05	1.41e-05	2.16e-05	0.000845511	6.03e-05	0.0332208	0.000109356	1.27e-05	0.000310838	4.36e-05	1.26e-05	2.49e-05	0.000102179
chrX	301	20210496	20260216	0.00192784	7.03334e-05	3.19449e-05	1.58788e-05	6.33392e-05	3.47862e-05	3.53874e-05	1.44924e-05	0.000177514	7.02166e-05	1.73449e-05	3.51298e-05	1.88298e-05	1.46939e-05	1.71078e-05	2.43e-05	4.35e-05	0.000160852	3.44e-05	0.0322063	0.000588377	1.43e-05	0.000123078	1.67e-05	1.35e-05	1.54e-05	2.18e-05
chrX	302	20260217	20332813	0.00817987	5.44517e-05	4.66583e-05	1.86015e-05	9.50359e-05	8.11196e-05	2.03355e-05	2.07349e-05	3.3023e-05	0.00015463	6.22749e-05	3.64585e-05	3.32088e-05	3.68148e-05	2.08453e-05	1.34e-05	2.17e-05	3.72e-05	3.77e-05	0.027369	0.00485959	3.01e-05	0.000104592	2.55e-05	2.52e-05	3.15e-05	1.81e-05
chrX	303	20332814	20395154	0.06345	3.46431e-05	8.91354e-05	2.0572e-05	2.82527e-05	2.06427e-05	1.43634e-05	5.62918e-05	2.62093e-05	0.000110667	9.95618e-05	0.000105465	2.6948e-05	0.000107519	7.89132e-05	1.27e-05	1.61e-05	4.64e-05	3.1e-05	0.0297677	0.0360507	1.56e-05	3.7e-05	3.05e-05	3.21e-05	0.000208468	1.74e-05
chrX	304	20395155	20451710	0.629264	0.000112947	0.000693157	8.93065e-05	2.20743e-05	1.67936e-05	1.73846e-05	3.82918e-05	1.84715e-05	2.53517e-05	4.82398e-05	2.64112e-05	2.24839e-05	4.70596e-05	0.000643655	1.59e-05	4.13e-05	0.000193986	1.97e-05	0.0440536	0.355388	2.56e-05	1.46e-05	2.94e-05	1.43e-05	8.42e-05	5.65e-05
chrX	305	20451711	20508285	0.772481	3.73251e-05	0.000319439	6.39096e-05	1.94818e-05	1.68578e-05	2.34229e-05	1.47855e-05	2.00569e-05	2.70472e-05	1.82464e-05	4.70465e-05	1.77412e-05	3.30342e-05	0.000209437	1.32e-05	0.00030934	0.000765458	4.16e-05	0.0464557	0.439329	1.96e-05	1.24e-05	2.57e-05	1.25e-05	2.42e-05	1.89e-05
chrX	306	20508286	20578317	0.826501	3.54851e-05	0.000235905	1.83818e-05	4.19787e-05	3.25176e-05	1.71926e-05	1.24667e-05	1.68638e-05	3.08163e-05	1.39744e-05	1.86519e-05	4.34248e-05	2.13985e-05	0.000267998	1.6e-05	0.00247899	0.006832	1.61e-05	0.0437625	0.470743	1.81e-05	1.27e-05	2.16e-05	1.32e-05	1.54e-05	3.12e-05
chrX	307	20578318	20650078	0.841349	2.92942e-05	4.97531e-05	1.99251e-05	1.78777e-05	2.56314e-05	1.28761e-05	1.28711e-05	1.35079e-05	5.46158e-05	2.11169e-05	3.81701e-05	9.07704e-05	7.79997e-05	4.98232e-05	1.36e-05	0.00340057	0.0297706	2.16e-05	0.0390504	0.481906	1.3e-05	1.7e-05	1.33e-05	2.21e-05	1.25e-05	1.64e-05
chrX	308	20650079	20734719	0.843994	3.67065e-05	4.68453e-05	1.6038e-05	1.55366e-05	1.56628e-05	1.25328e-05	1.72098e-05	1.91411e-05	7.57093e-05	6.5678e-05	2.06584e-05	9.65974e-05	0.00015978	2.53156e-05	1.95e-05	0.00256351	0.0441908	5.04e-05	0.0308138	0.487262	1.42e-05	3.09e-05	1.23e-05	1.34e-05	1.26e-05	3.05e-05
chrX	309	20734720	20797489	0.844297	1.58262e-05	2.50983e-05	1.55412e-05	3.97052e-05	1.3245e-05	1.45892e-05	1.30119e-05	1.39779e-05	6.71441e-05	4.3601e-05	5.49482e-05	6.49969e-05	0.000126743	1.44007e-05	1.68e-05	0.00100431	0.0488556	1.74e-05	0.0220163	0.492159	3.02e-05	1.65e-05	1.25e-05	1.43e-05	1.3e-05	1.54e-05
chrX	310	20797490	20859868	0.845298	1.26323e-05	1.56743e-05	1.51684e-05	1.50723e-05	1.91768e-05	1.66179e-05	1.51249e-05	1.24155e-05	2.04951e-05	2.76819e-05	3.37885e-05	3.09126e-05	2.50188e-05	1.2977e-05	1.31e-05	0.000674841	0.0514616	2.52e-05	0.0182558	0.497919	4.75e-05	1.5e-05	1.5e-05	1.25e-05	1.24e-05	1.7e-05
chrX	311	20859869	20913153	0.85758	1.26673e-05	3.33393e-05	1.24692e-05	1.46749e-05	1.59149e-05	1.29482e-05	1.46114e-05	1.24281e-05	1.51224e-05	1.70338e-05	1.80832e-05	1.57823e-05	1.47495e-05	1.63107e-05	1.54e-05	0.000727716	0.0512	0.000124197	0.0209916	0.530134	6.14e-05	1.64e-05	2.03e-05	1.25e-05	1.22e-05	1.55e-05
chrX	312	20913154	20968375	0.879637	1.71093e-05	0.000152591	1.25198e-05	2.30178e-05	3.91082e-05	1.26427e-05	1.33029e-05	1.48468e-05	2.43089e-05	2.27988e-05	1.88825e-05	2.68962e-05	1.64173e-05	5.03672e-05	1.27e-05	8.23e-05	0.0467323	0.00085934	0.0260734	0.61354	0.000174629	2.4e-05	1.52e-05	1.25e-05	1.23e-05	1.37e-05
chrX	313	20968376	21046335	0.943568	2.77197e-05	0.00138129	1.50132e-05	0.000107283	0.00021007	1.56468e-05	2.16121e-05	1.27743e-05	0.000134428	7.61716e-05	3.66059e-05	0.000124116	4.29369e-05	0.000305805	1.25e-05	2.07e-05	0.0358133	0.00306585	0.0465681	0.796068	0.00107221	2.14e-05	1.35e-05	1.43e-05	1.35e-05	2.4e-05
chrX	314	21046336	21101979	0.984596	8.82278e-05	0.0114211	1.95592e-05	8.11697e-05	0.000271443	1.53275e-05	0.000105828	1.50765e-05	0.000112022	4.59526e-05	5.42978e-05	0.000178364	4.28439e-05	0.000386992	1.34e-05	1.63e-05	0.0242287	0.0056868	0.153375	0.943568	0.00702029	7.84e-05	1.39e-05	3.06e-05	2.53e-05	2.48e-05
chrX	315	21101980	21172404	0.995794	0.000219695	0.0133682	7.3085e-05	0.000138307	0.000360944	4.11911e-05	3.45324e-05	1.98663e-05	0.000118432	0.000134211	4.96225e-05	0.000249398	5.82816e-05	7.90688e-05	2.46e-05	2.28e-05	0.00571093	0.00564462	0.221571	0.983822	0.0679786	0.000161229	2.02e-05	0.000132154	2e-05	6.58e-05
chrX	316	21172405	21249851	0.998917	0.000656787	0.0120924	6.84549e-05	0.000195246	0.000573353	0.000307897	8.97758e-05	5.34243e-05	0.000357832	0.00022652	9.44653e-05	0.000252863	5.79337e-05	5.58363e-05	1.6e-05	3.05e-05	0.000812911	0.00386848	0.237907	0.995027	0.0849142	0.00035774	1.57e-05	3.54e-05	4.23e-05	4.03e-05
chrX	317	21249852	21317209	0.999666	0.000572472	0.00532795	2.25663e-05	3.66684e-05	7.70443e-05	5.60723e-05	4.32212e-05	2.54468e-05	8.32795e-05	0.000102617	4.01515e-05	3.87786e-05	2.18016e-05	6.6429e-05	2.85e-05	5.76e-05	0.000207566	0.00194434	0.250546	0.998523	0.0876043	0.000740898	1.79e-05	2.61e-05	3.62e-05	9.18e-05
chrX	318	21317210	21377160	0.999847	9.95809e-05	0.0012634	2.83535e-05	4.43024e-05	3.18572e-05	1.66705e-05	1.76964e-05	1.77933e-05	3.61648e-05	4.21021e-05	3.61875e-05	1.59367e-05	2.48529e-05	7.12057e-05	1.61e-05	0.000211253	5.43e-05	0.00021352	0.280323	0.999431	0.0809865	0.00115526	2.2e-05	1.57e-05	1.7e-05	2.17e-05
chrX	319	21377161	21456176	0.999842	2.20508e-05	0.000171937	6.95629e-05	2.75772e-05	3.56305e-05	1.39879e-05	1.40023e-05	2.01729e-05	2.65944e-05	1.66936e-05	1.89312e-05	1.96607e-05	2.14042e-05	0.000230477	1.29e-05	0.00185315	1.77e-05	3.4e-05	0.296182	0.999607	0.0862889	0.00553652	2.38e-05	1.3e-05	1.38e-05	1.61e-05
chrX	320	21456177	21641806	0.999816	2.17008e-05	0.000102397	0.000188449	8.82246e-05	7.75511e-05	1.74824e-05	1.65952e-05	1.83463e-05	0.000121857	2.32264e-05	3.92187e-05	8.02666e-05	4.40193e-05	0.00162456	1.28e-05	0.0183495	1.55e-05	2.42e-05	0.313395	0.999623	0.110399	0.0505905	1.77e-05	1.56e-05	1.31e-05	3.84e-05
chrX	321	21641807	21880930	0.999902	1.74119e-05	3.48934e-05	0.000271485	0.000219902	0.000282715	5.42134e-05	3.22349e-05	4.08167e-05	0.00102978	0.000119097	2.44818e-05	0.000661693	0.000142803	0.0118064	1.45e-05	0.138851	3.67e-05	2.92e-05	0.382747	0.999758	0.140844	0.284209	3.24e-05	1.91e-05	1.97e-05	5.42e-05
chrX	322	21880931	21936703	0.999922	4.43457e-05	7.8048e-05	0.000240599	0.0015601	0.000947854	3.45791e-05	2.45238e-05	0.000209195	0.00190984	0.000252009	4.65143e-05	0.0011544	0.00115316	0.0405427	1.54e-05	0.515671	1.77e-05	4.49e-05	0.62638	0.999796	0.151489	0.646902	3.43e-05	8e-05	2.01e-05	0.000137391
chrX	323	21936704	22002898	0.999889	0.000277415	0.000367289	0.000903549	0.00133949	0.000860585	0.000112794	9.19306e-05	0.000452982	0.00181338	0.000598474	0.00017808	0.00163968	0.00152773	0.0471955	4.09e-05	0.727592	1.36e-05	3.76e-05	0.782418	0.999781	0.150918	0.794475	4.99e-05	0.00019828	8.33e-05	0.000341939
chrX	324	22002899	22073766	0.999842	0.0017233	0.00140453	0.00319609	0.000734494	0.00122816	0.00084372	0.000206473	0.000474808	0.00329077	0.0021495	0.00083265	0.00810425	0.00236373	0.0533542	0.000300489	0.817105	2.09e-05	0.000168445	0.894535	0.999727	0.142904	0.877456	0.000184029	0.00108569	0.000690396	0.00142057
chrX	325	22073767	22138112	0.999614	0.00163002	0.00115286	0.00531631	0.00127158	0.00199847	0.00166031	0.000279402	0.000862782	0.0136793	0.0142059	0.00463415	0.0748853	0.00636408	0.0557588	0.00295947	0.867359	7.15e-05	0.000545753	0.92285	0.999523	0.105395	0.908999	0.000752976	0.00188246	0.00362126	0.00232619
chrX	326	22138113	22222896	0.998792	0.00330065	0.00236747	0.0283324	0.00475422	0.00920365	0.010776	0.000786814	0.00270772	0.0238694	0.0262146	0.00891224	0.0932518	0.0108876	0.0916406	0.00366821	0.880861	0.000456936	0.00127804	0.930447	0.998748	0.0940083	0.917132	0.00400803	0.00427307	0.00760741	0.0121598
chrX	327	22222897	22422826	0.995873	0.017097	0.0097526	0.0342983	0.0399679	0.0295393	0.0229069	0.00431698	0.0105913	0.0258648	0.0380298	0.00931805	0.111452	0.0152116	0.127356	0.00461576	0.882326	0.00201351	0.00695803	0.930092	0.995886	0.0910904	0.917491	0.00743717	0.0112782	0.0123062	0.0218559

## Sheet: 2L
chr	window	start	stop	CK2	CO13N	CO9N	RC5	RG13N	RG37N	RG39	RG6N	RG8	SP173	SP188	SP221	SP235	SP241	SP80	ED55.2	ED56.2
chr2L	0	0	294741	0.993201	0.00756942	0.950631	0.424589	0.0195804	0.817578	0.687796	0.0157301	0.993445	0.106762	0.153412	0.192425	0.505178	0.031712	0.0185214	0.993799	0.00595007
chr2L	1	294742	444593	0.996103	0.0060343	0.983953	0.453429	0.0138202	0.824176	0.687778	0.0039867	0.996688	0.111398	0.155012	0.192604	0.539787	0.0299957	0.0143689	0.997054	0.00262139
chr2L	2	444594	525060	0.997987	0.00783934	0.994438	0.459208	0.0143504	0.844453	0.67975	0.0018794	0.998905	0.108501	0.145838	0.196852	0.682492	0.0286492	0.010737	0.998617	0.00250954
chr2L	3	525061	583116	0.999309	0.0141837	0.99776	0.465107	0.0151947	0.868328	0.675321	0.000738017	0.999601	0.101841	0.130019	0.216868	0.772798	0.0252244	0.0044896	0.999495	0.000381197
chr2L	4	583117	649371	0.999679	0.0180853	0.998832	0.458451	0.018858	0.873854	0.650049	0.000834486	0.999821	0.0757436	0.0749126	0.219858	0.798077	0.0181932	0.00369708	0.999739	7.69246e-05
chr2L	5	649372	720660	0.999817	0.0177046	0.999119	0.475812	0.0274962	0.881325	0.641766	0.000377592	0.999867	0.0623335	0.0196331	0.233475	0.833606	0.0150723	0.00343685	0.999821	3.69237e-05
chr2L	6	720661	768213	0.999818	0.0250886	0.998844	0.541819	0.0889809	0.942271	0.635182	0.000320691	0.999839	0.0405274	0.0117764	0.284489	0.878343	0.0120254	0.00490668	0.999802	3.93569e-05
chr2L	7	768214	821234	0.999896	0.0557762	0.999302	0.626766	0.11235	0.959962	0.637953	0.000246536	0.999898	0.0185336	0.00489916	0.411894	0.93454	0.00731969	0.00656605	0.999879	0.000108173
chr2L	8	821235	877144	0.999921	0.13205	0.999252	0.743049	0.120044	0.964441	0.668395	0.000539675	0.999905	0.00862494	0.0012453	0.48391	0.952037	0.00711257	0.0193051	0.999883	9.00982e-05
chr2L	9	877145	919173	0.999925	0.154396	0.99882	0.786579	0.131144	0.963702	0.676682	0.000634849	0.999919	0.00473221	0.000344472	0.503383	0.958358	0.0102262	0.0854111	0.999915	0.000332861
chr2L	10	919174	967418	0.999898	0.158958	0.997352	0.798334	0.131064	0.957189	0.685188	0.00105287	0.999916	0.00485496	0.000318171	0.505553	0.958615	0.0100221	0.17014	0.999923	0.00128176
chr2L	11	967419	1024996	0.999797	0.153573	0.992373	0.805273	0.122874	0.932686	0.680915	0.000422908	0.999925	0.00908338	0.000271947	0.516824	0.953414	0.013142	0.194648	0.999915	0.000994845
chr2L	12	1024997	1066000	0.999541	0.128971	0.979185	0.801647	0.127378	0.921639	0.656187	0.000285122	0.999934	0.0137618	0.000545291	0.513756	0.933489	0.0174151	0.201545	0.999925	0.000721759
chr2L	13	1066001	1114086	0.999409	0.0440952	0.936714	0.786614	0.122862	0.890851	0.568357	6.37965e-05	0.999937	0.0159199	0.00138009	0.497082	0.86557	0.0178551	0.198627	0.999934	0.000252519
chr2L	14	1114087	1171987	0.998654	0.0266475	0.803301	0.735393	0.10116	0.790559	0.340702	4.47984e-05	0.999924	0.0149107	0.00184338	0.440732	0.798588	0.0176441	0.181075	0.999925	0.000249616
chr2L	15	1171988	1218735	0.999231	0.00571691	0.783636	0.583741	0.0261748	0.49501	0.0709134	7.83254e-05	0.999885	0.00835558	0.00102966	0.252685	0.576232	0.0131752	0.11565	0.999887	0.000865505
chr2L	16	1218736	1268807	0.999598	0.00138991	0.784508	0.191356	0.0151967	0.450135	0.0211782	0.000246439	0.999875	0.00745424	0.00149912	0.177122	0.513939	0.0135594	0.0937753	0.999881	0.00426169
chr2L	17	1268808	1311734	0.999602	0.00076957	0.799637	0.0583233	0.0059518	0.447409	0.00320103	0.000577013	0.999775	0.00669217	0.00171574	0.0873988	0.460651	0.0142363	0.077865	0.999772	0.011694
chr2L	18	1311735	1352445	0.99964	0.00119056	0.887344	0.0102986	0.00137251	0.446188	0.00052777	0.000786429	0.999762	0.0047583	0.0019331	0.0171014	0.376058	0.0136123	0.0642517	0.999723	0.0155659
chr2L	19	1352446	1400345	0.999718	0.00050733	0.912346	0.00293978	0.000562845	0.427236	0.000121708	0.000210613	0.99981	0.00262229	0.0023176	0.00699961	0.292371	0.0132134	0.0651491	0.999722	0.0153196
chr2L	20	1400346	1444512	0.999642	0.000216562	0.926278	0.000865656	0.00063767	0.356974	9.76532e-05	8.90417e-05	0.999824	0.00226081	0.00251041	0.00361973	0.274881	0.0131341	0.0600268	0.999754	0.0108254
chr2L	21	1444513	1488440	0.999242	0.000166854	0.928921	0.000376847	0.000815978	0.314786	3.60638e-05	3.46227e-05	0.999744	0.00198472	0.00261725	0.00213075	0.262274	0.0121144	0.0429475	0.999717	0.0115316
chr2L	22	1488441	1548750	0.99776	6.33188e-05	0.937344	0.000538839	0.000892115	0.311904	4.62267e-05	4.66551e-05	0.999734	0.00151635	0.00272071	0.00125387	0.254004	0.0117466	0.0279044	0.999711	0.0127786
chr2L	23	1548751	1602785	0.998642	5.9661e-05	0.93923	0.000752649	0.000771543	0.29298	0.000173136	6.47018e-05	0.999776	0.00188967	0.00212398	0.000444325	0.239028	0.00875605	0.0141802	0.99975	0.0108727
chr2L	24	1602786	1641793	0.999533	0.000172938	0.956354	0.00129974	0.000592525	0.286255	0.000840062	0.00012971	0.999878	0.00221756	0.00166485	0.000401966	0.214164	0.00560562	0.00746858	0.999842	0.00561447
chr2L	25	1641794	1693986	0.999794	0.000128269	0.986478	0.00275161	0.000320481	0.281514	0.00143877	0.000108135	0.999909	0.00190451	0.00121241	0.000362537	0.174124	0.00330254	0.00164013	0.999907	0.0016567
chr2L	26	1693987	1740268	0.999878	0.000415498	0.99578	0.0125972	0.000403574	0.280628	0.00184461	8.13996e-05	0.999909	0.00161702	0.000706591	0.000595583	0.13441	0.00372061	0.000676425	0.999921	0.000710168
chr2L	27	1740269	1788637	0.99989	0.00251146	0.998516	0.0158538	0.000382912	0.299336	0.000845678	0.000202841	0.999891	0.0022401	0.000906827	0.00190055	0.124087	0.00416264	0.00014752	0.999928	0.000218366
chr2L	28	1788638	1841366	0.99989	0.00972624	0.999312	0.0343093	0.000619435	0.367621	0.000855501	0.000597017	0.999849	0.0027883	0.00101238	0.0108806	0.115393	0.00466854	9.47808e-05	0.99992	0.000272185
chr2L	29	1841367	1888619	0.999868	0.0114788	0.999587	0.0621022	0.00277031	0.738685	0.000407937	0.000141916	0.999814	0.00313357	0.00101032	0.0290987	0.10793	0.00497226	0.000105093	0.999873	0.000173425
chr2L	30	1888620	1935143	0.999821	0.0188139	0.999575	0.123847	0.00393476	0.870333	0.00068381	6.74522e-05	0.999868	0.00368901	0.00268816	0.117278	0.101731	0.00532758	0.000109556	0.999832	0.000461557
chr2L	31	1935144	1976661	0.999862	0.0199793	0.999574	0.277324	0.0103319	0.909118	0.0028242	0.000162785	0.99987	0.004347	0.00477325	0.141769	0.0969463	0.00603124	0.000112252	0.999863	0.000817515
chr2L	32	1976662	2015452	0.999854	0.0307868	0.999174	0.406753	0.0166065	0.920221	0.00305184	0.000715754	0.999901	0.00563044	0.00457756	0.27669	0.0932695	0.00679049	0.000172118	0.99985	0.000506156
chr2L	33	2015453	2068357	0.999724	0.032996	0.99808	0.455093	0.0180209	0.921475	0.00144856	0.00435189	0.999917	0.00517697	0.00317627	0.314064	0.0758908	0.0115036	0.000490304	0.999865	0.00102926
chr2L	34	2068358	2138714	0.999264	0.0320793	0.994972	0.467252	0.0165884	0.942819	0.000674717	0.00485948	0.999908	0.00452154	0.00342751	0.334514	0.0744279	0.0169928	0.000834012	0.999838	0.000600745
chr2L	35	2138715	2205332	0.998891	0.0375386	0.994198	0.471965	0.0200552	0.948229	0.000938174	0.00949543	0.999891	0.00368134	0.00363776	0.408801	0.0758994	0.0231404	0.000973979	0.999884	0.000488351
chr2L	36	2205333	2262415	0.999494	0.0405294	0.99095	0.464089	0.0469358	0.982314	0.000161305	0.0349932	0.999857	0.00283803	0.00641902	0.471365	0.0860371	0.0290934	0.000910261	0.999873	0.000592376
chr2L	37	2262416	2306493	0.999582	0.0450366	0.992355	0.428622	0.0539579	0.9946	5.78881e-05	0.044427	0.999775	0.0025798	0.00903533	0.49155	0.144349	0.0728937	0.00095259	0.99978	0.000648519
chr2L	38	2306494	2347666	0.999664	0.0556354	0.991567	0.398964	0.0637691	0.998238	0.000100735	0.0462211	0.999757	0.00322402	0.0280667	0.536126	0.461156	0.15658	0.000911152	0.999749	0.0005893
chr2L	39	2347667	2392051	0.999668	0.0878066	0.995808	0.393199	0.0959645	0.999319	0.000385045	0.0421515	0.999796	0.00366546	0.0398262	0.85041	0.777948	0.388624	0.000769045	0.999787	0.000791927
chr2L	40	2392052	2433951	0.999717	0.0960841	0.997356	0.364097	0.306569	0.999717	0.00132153	0.0256935	0.999833	0.00622417	0.0424749	0.943145	0.867583	0.457964	0.000526124	0.999841	0.00293263
chr2L	41	2433952	2500100	0.999595	0.0952375	0.997493	0.259736	0.385571	0.999865	0.00101454	0.0213204	0.9998	0.023606	0.0395704	0.978098	0.895165	0.483664	0.000358334	0.999782	0.00297624
chr2L	42	2500101	2541148	0.999196	0.0942954	0.996455	0.238941	0.4072	0.999895	0.00176248	0.0106979	0.999822	0.0673095	0.0389864	0.988017	0.902657	0.488482	0.000290985	0.999791	0.00110042
chr2L	43	2541149	2592118	0.997726	0.0941785	0.998409	0.220492	0.516597	0.999887	0.00457523	0.00973627	0.999872	0.123284	0.038908	0.990705	0.902502	0.495298	0.000225098	0.999867	0.000472038
chr2L	44	2592119	2637921	0.99867	0.0842356	0.99894	0.154456	0.55037	0.999817	0.00479855	0.00395923	0.999897	0.13943	0.0340839	0.991113	0.895228	0.48938	0.000367405	0.999856	0.000679619
chr2L	45	2637922	2678888	0.999225	0.0655995	0.998762	0.14587	0.5577	0.999585	0.0030372	0.000642997	0.9999	0.141617	0.0345873	0.989068	0.871136	0.481379	0.000314535	0.999916	0.000253184
chr2L	46	2678889	2723606	0.999336	0.0550518	0.997562	0.135105	0.554954	0.999012	0.0034799	0.000157837	0.999901	0.166728	0.0389474	0.981024	0.85785	0.481581	0.000319367	0.999932	0.000192292
chr2L	47	2723607	2781165	0.998965	0.05636	0.995497	0.140033	0.570846	0.999153	0.00684756	0.000142478	0.999903	0.230019	0.0725165	0.981376	0.854442	0.512838	0.000211548	0.99993	0.000192432
chr2L	48	2781166	2822726	0.997469	0.056685	0.994294	0.136234	0.606813	0.998711	0.00876999	0.000501522	0.999909	0.417191	0.305607	0.978544	0.868997	0.580158	0.00059183	0.999929	0.000741108
chr2L	49	2822727	2856685	0.998125	0.0733781	0.995145	0.141526	0.657055	0.99947	0.013418	0.00174145	0.999885	0.634415	0.572139	0.982555	0.890122	0.750474	0.000855753	0.999921	0.000617383
chr2L	50	2856686	2910503	0.998228	0.0901006	0.994363	0.13802	0.67165	0.999668	0.013904	0.00376624	0.999879	0.703313	0.647772	0.983315	0.895175	0.799254	0.00181977	0.999877	0.000967882
chr2L	51	2910504	2985157	0.997616	0.0942761	0.99268	0.123588	0.764644	0.999574	0.0156283	0.00363186	0.99983	0.787014	0.75136	0.982784	0.921528	0.848156	0.0030704	0.999842	0.000251345
chr2L	52	2985158	3054632	0.998527	0.132067	0.995131	0.126121	0.872742	0.999788	0.0258008	0.00410303	0.999865	0.839934	0.874773	0.99038	0.9381	0.897201	0.00413637	0.999873	9.80828e-05
chr2L	53	3054633	3106913	0.998556	0.141786	0.997326	0.121639	0.906638	0.999859	0.0280881	0.00593389	0.999865	0.855982	0.910431	0.992429	0.94223	0.910467	0.00391332	0.99988	3.26788e-05
chr2L	54	3106914	3140317	0.997676	0.140951	0.997774	0.0996653	0.917215	0.999829	0.02592	0.00674711	0.999814	0.858898	0.923419	0.992172	0.94047	0.912926	0.00686933	0.999841	2.3918e-05
chr2L	55	3140318	3184139	0.99926	0.13875	0.998018	0.0916874	0.952806	0.999852	0.0284318	0.0152683	0.999815	0.863982	0.925825	0.996514	0.949118	0.908707	0.00686298	0.999811	2.99473e-05
chr2L	56	3184140	3235749	0.999727	0.12251	0.997411	0.0600839	0.965248	0.999793	0.0262658	0.0170806	0.999881	0.862046	0.92123	0.997628	0.950011	0.894355	0.00527265	0.999846	4.22406e-05
chr2L	57	3235750	3282742	0.999871	0.123274	0.999006	0.0447497	0.969543	0.999626	0.0270535	0.0175471	0.999907	0.875092	0.920177	0.998696	0.952257	0.877308	0.0038319	0.999864	0.000136015
chr2L	58	3282743	3329034	0.999906	0.120006	0.999522	0.0336876	0.969135	0.999163	0.0404149	0.0149591	0.999922	0.877313	0.910743	0.998858	0.951204	0.824282	0.00250827	0.999887	0.000784726
chr2L	59	3329035	3377149	0.999916	0.111627	0.999642	0.0135779	0.963248	0.997572	0.0873593	0.0147682	0.999904	0.870493	0.877224	0.998375	0.943061	0.647172	0.0013778	0.999882	0.00453831
chr2L	60	3377150	3408609	0.999902	0.117321	0.999454	0.0108011	0.966385	0.996679	0.360637	0.0153952	0.999866	0.865548	0.868938	0.99629	0.945924	0.489309	0.000315186	0.99981	0.0177934
chr2L	61	3408610	3443812	0.999847	0.11462	0.9988	0.0124133	0.965156	0.993962	0.515519	0.0137963	0.999847	0.843229	0.841625	0.988906	0.943384	0.46097	0.000227913	0.999813	0.0212628
chr2L	62	3443813	3480984	0.999881	0.0986234	0.997532	0.0128377	0.957823	0.985131	0.573544	0.0142692	0.9999	0.768526	0.74504	0.966802	0.9318	0.453615	0.000349611	0.999891	0.0475363
chr2L	63	3480985	3520564	0.999823	0.0557728	0.998689	0.0106068	0.932203	0.95526	0.590614	0.021568	0.999883	0.502244	0.431929	0.895198	0.900068	0.428183	0.00100993	0.999888	0.103021
chr2L	64	3520565	3562638	0.999815	0.0414469	0.998859	0.00238309	0.8514	0.878726	0.591709	0.0274514	0.999842	0.395242	0.342067	0.65523	0.806195	0.343552	0.0014765	0.999842	0.149651
chr2L	65	3562639	3608027	0.999884	0.0195949	0.99948	0.00127585	0.837383	0.675042	0.606597	0.0332196	0.999887	0.298667	0.267494	0.60258	0.657995	0.209603	0.0020567	0.999883	0.161946
chr2L	66	3608028	3645099	0.999875	0.0159141	0.999713	0.00167721	0.836415	0.616828	0.672711	0.0388759	0.999858	0.218983	0.244503	0.59812	0.549664	0.185486	0.00630031	0.999845	0.248062
chr2L	67	3645100	3686942	0.999899	0.0112072	0.999696	0.000840699	0.823449	0.419294	0.739676	0.0384519	0.999831	0.208494	0.209392	0.572131	0.224794	0.10345	0.0070775	0.999748	0.597698
chr2L	68	3686943	3733114	0.999868	0.00236591	0.999455	0.000535589	0.786762	0.356892	0.765003	0.0310906	0.999802	0.204894	0.190181	0.487955	0.172889	0.0437118	0.00565139	0.999721	0.702512
chr2L	69	3733115	3771415	0.999729	0.00116319	0.998747	0.000368416	0.659255	0.350024	0.855502	0.0108541	0.999804	0.199867	0.180263	0.192541	0.144008	0.031563	0.00745799	0.999758	0.732368
chr2L	70	3771416	3806839	0.999323	0.00145123	0.999074	0.000919462	0.631852	0.319521	0.882355	0.0050737	0.999839	0.193037	0.179057	0.0736355	0.120056	0.0227227	0.00695726	0.99973	0.738761
chr2L	71	3806840	3844955	0.997933	0.000433686	0.998883	0.00114399	0.631214	0.25149	0.889033	0.00278461	0.999892	0.184188	0.163996	0.0556323	0.112981	0.0213515	0.00358965	0.999765	0.734945
chr2L	72	3844956	3879478	0.994181	0.000248239	0.997758	0.0013013	0.636491	0.24351	0.894389	0.00216792	0.999891	0.17521	0.151417	0.0547656	0.107102	0.0204834	0.00104807	0.999771	0.729522
chr2L	73	3879479	3917271	0.994707	0.000443218	0.994078	0.00138341	0.649497	0.216853	0.912929	0.00308526	0.999861	0.176265	0.104112	0.067283	0.110625	0.023468	0.000838168	0.999824	0.736358
chr2L	74	3917272	3957747	0.997917	0.00215405	0.99475	0.00183958	0.659991	0.168947	0.919281	0.00517396	0.999824	0.184379	0.0970069	0.0694265	0.139023	0.0271246	0.00180285	0.999804	0.735778
chr2L	75	3957748	3995409	0.99912	0.00637171	0.996187	0.00241336	0.66555	0.164004	0.959502	0.0115514	0.999867	0.194131	0.10296	0.072391	0.182093	0.0561556	0.00729317	0.999859	0.725226
chr2L	76	3995410	4028200	0.999534	0.011991	0.996235	0.00293621	0.675123	0.176814	0.977867	0.0126443	0.999875	0.221508	0.127469	0.100862	0.247285	0.0912072	0.00942666	0.999852	0.704755
chr2L	77	4028201	4074233	0.999608	0.0127701	0.995109	0.00416101	0.706459	0.25689	0.983358	0.0107828	0.999821	0.35634	0.174726	0.287554	0.380662	0.131976	0.00899374	0.999809	0.629463
chr2L	78	4074234	4118103	0.999698	0.0148154	0.991021	0.00751942	0.759083	0.359254	0.985344	0.00317652	0.999858	0.52871	0.22952	0.508112	0.536202	0.189898	0.00532412	0.999851	0.540222
chr2L	79	4118104	4157311	0.999586	0.0268365	0.989587	0.011301	0.832234	0.541924	0.984291	0.00154876	0.999891	0.740306	0.292159	0.813285	0.695297	0.269554	0.00481548	0.999828	0.512691
chr2L	80	4157312	4201092	0.999808	0.108319	0.993166	0.0156723	0.926392	0.744349	0.986951	0.00135108	0.999896	0.874327	0.331449	0.916867	0.796007	0.766757	0.00440641	0.999887	0.415948
chr2L	81	4201093	4238220	0.999862	0.154274	0.993726	0.0377912	0.961844	0.803427	0.986624	0.00291403	0.999895	0.91646	0.448665	0.947663	0.834682	0.906477	0.00100758	0.999865	0.0873344
chr2L	82	4238221	4286391	0.999877	0.233821	0.992911	0.0441541	0.974297	0.825168	0.983821	0.0116631	0.999842	0.932284	0.482586	0.956554	0.848489	0.959054	0.000597358	0.999756	0.0402141
chr2L	83	4286392	4333543	0.999874	0.593986	0.996475	0.0439128	0.991665	0.847313	0.984324	0.0358563	0.999758	0.950677	0.669922	0.964079	0.84968	0.973706	0.000892956	0.999679	0.0314166
chr2L	84	4333544	4371763	0.999838	0.696853	0.998542	0.0467896	0.996558	0.939408	0.991905	0.0421906	0.999732	0.962236	0.893546	0.989405	0.857037	0.99097	0.00111955	0.999637	0.00758859
chr2L	85	4371764	4418666	0.999889	0.728275	0.999082	0.0439459	0.998748	0.979306	0.993927	0.0419458	0.999757	0.965111	0.95981	0.996697	0.855808	0.996386	0.00371933	0.999621	0.00324251
chr2L	86	4418667	4468170	0.999907	0.883249	0.999163	0.0498729	0.999471	0.991846	0.997093	0.0346852	0.999657	0.964069	0.981913	0.998803	0.865165	0.997853	0.0102116	0.999309	0.000651157
chr2L	87	4468171	4547083	0.999866	0.930374	0.998669	0.0491558	0.999742	0.996208	0.997841	0.0308373	0.999296	0.957784	0.990142	0.999488	0.864981	0.998209	0.011872	0.998375	0.00026497
chr2L	88	4547084	4615790	0.999895	0.978229	0.999362	0.0506832	0.999854	0.998205	0.999234	0.0317924	0.999551	0.951772	0.992386	0.999759	0.868898	0.999395	0.0178462	0.998903	0.000150095
chr2L	89	4615791	4674549	0.999887	0.991903	0.999571	0.0535746	0.999866	0.998922	0.999623	0.02968	0.999629	0.950219	0.992387	0.999858	0.864987	0.999714	0.0186482	0.999294	0.000397048
chr2L	90	4674550	4712471	0.999895	0.997045	0.999443	0.0543121	0.999831	0.999327	0.999659	0.0293805	0.999712	0.940195	0.990093	0.999861	0.845833	0.999736	0.0157846	0.999534	0.00115198
chr2L	91	4712472	4754219	0.999898	0.99884	0.998722	0.0556985	0.999868	0.999645	0.999497	0.0257926	0.999831	0.924084	0.984398	0.999854	0.81514	0.99981	0.00421831	0.999754	0.00239373
chr2L	92	4754220	4797064	0.999841	0.999328	0.999097	0.0634357	0.999825	0.999791	0.998752	0.0274535	0.999874	0.880398	0.98057	0.999798	0.732307	0.999784	0.00269132	0.999786	0.00760104
chr2L	93	4797065	4847116	0.99987	0.999303	0.998855	0.121541	0.999863	0.999812	0.996385	0.0244219	0.999849	0.811396	0.974596	0.999737	0.519686	0.999826	0.000608371	0.999883	0.00855988
chr2L	94	4847117	4892019	0.999868	0.999266	0.999195	0.137882	0.999798	0.999876	0.988362	0.0132456	0.999832	0.628098	0.971754	0.999438	0.487774	0.999723	0.000365602	0.999909	0.0184995
chr2L	95	4892020	4958589	0.999903	0.998651	0.999071	0.169895	0.999576	0.99991	0.960021	0.0116738	0.999887	0.601864	0.967098	0.999251	0.481322	0.999685	0.000440119	0.999926	0.0205892
chr2L	96	4958590	5036121	0.999884	0.998679	0.998182	0.183671	0.998782	0.999898	0.865643	0.00439161	0.999882	0.561999	0.964251	0.998921	0.451452	0.999481	0.000315663	0.999915	0.0278202
chr2L	97	5036122	5095534	0.999846	0.997893	0.995038	0.18556	0.995986	0.999842	0.551321	0.000892436	0.999906	0.432004	0.951548	0.997467	0.384695	0.998633	0.000256325	0.99992	0.0462116
chr2L	98	5095535	5132313	0.999751	0.997104	0.995237	0.180937	0.996672	0.999887	0.493778	0.000161199	0.999901	0.400567	0.946262	0.99838	0.376694	0.998766	0.000186052	0.999912	0.0646372
chr2L	99	5132314	5180923	0.999863	0.993954	0.993696	0.163798	0.996057	0.999899	0.29153	5.37011e-05	0.999891	0.298641	0.926754	0.998538	0.343106	0.998266	0.000224912	0.999915	0.165693
chr2L	100	5180924	5225404	0.999873	0.993781	0.996017	0.146738	0.993173	0.999916	0.241853	7.50221e-05	0.999867	0.257985	0.883777	0.998279	0.342168	0.997036	0.000679382	0.999883	0.193781
chr2L	101	5225405	5269173	0.999848	0.991647	0.998572	0.0902146	0.982882	0.999897	0.0828132	3.56068e-05	0.999755	0.127316	0.730456	0.997082	0.326425	0.992484	0.000226958	0.999744	0.203331
chr2L	102	5269174	5318223	0.999812	0.98669	0.99931	0.0804628	0.981968	0.999861	0.0593699	5.9402e-05	0.999724	0.108354	0.322372	0.993062	0.265962	0.992627	9.61082e-05	0.999682	0.20158
chr2L	103	5318224	5359349	0.999767	0.969393	0.999462	0.0439566	0.976117	0.999785	0.0561948	0.000273576	0.999715	0.108756	0.257126	0.978809	0.25644	0.991858	9.90758e-05	0.999687	0.185682
chr2L	104	5359350	5401165	0.999785	0.968074	0.999237	0.0362667	0.975857	0.999461	0.0545421	0.000632836	0.999753	0.112342	0.242056	0.957649	0.261677	0.990303	9.03501e-05	0.999731	0.128854
chr2L	105	5401166	5437766	0.999869	0.960554	0.998251	0.030924	0.971489	0.998792	0.054178	0.00016541	0.999845	0.107552	0.247314	0.942444	0.311579	0.984267	5.91895e-05	0.999824	0.0960772
chr2L	106	5437767	5475469	0.999906	0.961828	0.994776	0.026539	0.974431	0.996357	0.060556	0.00017257	0.999885	0.112096	0.254245	0.924508	0.371014	0.979326	8.13442e-05	0.999825	0.0236944
chr2L	107	5475470	5517443	0.999893	0.968269	0.994975	0.0236638	0.989448	0.997132	0.0970977	6.37338e-05	0.999868	0.117403	0.263362	0.913109	0.441326	0.975133	9.40214e-05	0.999794	0.0130871
chr2L	108	5517444	5560540	0.999904	0.983659	0.994554	0.021143	0.99524	0.999044	0.345014	4.4323e-05	0.999888	0.144453	0.274381	0.915473	0.760536	0.9719	4.59586e-05	0.999842	0.00522744
chr2L	109	5560541	5606294	0.999905	0.990661	0.997739	0.00973556	0.996839	0.999662	0.417325	0.000104103	0.99988	0.150582	0.272996	0.911373	0.868851	0.959385	0.000103433	0.99984	0.00391852
chr2L	110	5606295	5649285	0.999905	0.992512	0.998601	0.00659471	0.997084	0.999838	0.436928	7.42755e-05	0.999877	0.149147	0.267649	0.912005	0.900351	0.92631	0.000426084	0.999878	0.00104317
chr2L	111	5649286	5697264	0.999899	0.992637	0.998919	0.00703385	0.996265	0.999865	0.581555	0.000213618	0.999887	0.168771	0.283396	0.920163	0.926996	0.919057	0.000763995	0.999874	0.000708058
chr2L	112	5697265	5744410	0.999891	0.995594	0.99878	0.0123796	0.998677	0.999863	0.858288	0.000893774	0.999883	0.191815	0.308109	0.956808	0.971556	0.914032	0.0009968	0.999849	0.00138647
chr2L	113	5744411	5788075	0.999859	0.99612	0.997666	0.0344123	0.999407	0.999824	0.939929	0.00362649	0.99981	0.196569	0.335933	0.96887	0.98535	0.921843	0.00112791	0.999768	0.00538213
chr2L	114	5788076	5846542	0.999886	0.995487	0.993989	0.0954835	0.999572	0.999778	0.966215	0.00385189	0.999779	0.190937	0.490738	0.990258	0.993205	0.931755	0.0011471	0.999747	0.0121668
chr2L	115	5846543	5886640	0.999901	0.992821	0.994638	0.450726	0.999747	0.999796	0.975276	0.00199995	0.999813	0.170994	0.53518	0.996588	0.9954	0.932926	0.000962675	0.999782	0.0134046
chr2L	116	5886641	5925037	0.9999	0.994072	0.993582	0.552138	0.999831	0.999833	0.977508	0.00082104	0.999874	0.132613	0.547905	0.998807	0.995764	0.927944	0.00117394	0.999881	0.013085
chr2L	117	5925038	5968402	0.999902	0.997607	0.989109	0.582316	0.999831	0.999837	0.984917	0.00013564	0.999904	0.114824	0.54873	0.999563	0.994685	0.91242	0.00141868	0.999903	0.0111025
chr2L	118	5968403	6020634	0.999904	0.998539	0.989405	0.612899	0.999884	0.999897	0.986537	3.78512e-05	0.999928	0.11598	0.584758	0.999759	0.997016	0.901526	0.000323839	0.999926	0.00464393
chr2L	119	6020635	6061555	0.999912	0.99947	0.991743	0.620193	0.999856	0.999898	0.993239	2.81898e-05	0.999925	0.122666	0.593116	0.999731	0.997613	0.894189	0.000125277	0.999918	0.00408429
chr2L	120	6061556	6108674	0.999916	0.999783	0.997491	0.617114	0.999686	0.999899	0.995348	5.13746e-05	0.999912	0.120443	0.588085	0.999475	0.997288	0.866677	0.000153526	0.999926	0.00306621
chr2L	121	6108675	6150936	0.999886	0.999893	0.999119	0.595709	0.999114	0.999838	0.995485	0.000159559	0.999906	0.106083	0.560624	0.998484	0.995558	0.772896	0.000389621	0.999915	0.00356479
chr2L	122	6150937	6207009	0.999835	0.999916	0.999621	0.518653	0.999659	0.999771	0.993934	0.000211353	0.999874	0.10786	0.557242	0.999437	0.995351	0.445229	0.000426687	0.999898	0.00916494
chr2L	123	6207010	6247970	0.999851	0.999897	0.999824	0.50085	0.999816	0.999498	0.99319	6.26076e-05	0.999851	0.103163	0.563406	0.999699	0.99299	0.393062	0.000390537	0.999858	0.0383576
chr2L	124	6247971	6289713	0.999794	0.999821	0.999888	0.501508	0.999889	0.999775	0.99392	8.23641e-05	0.999817	0.112648	0.599104	0.999679	0.991614	0.381889	0.000413663	0.999801	0.0461767
chr2L	125	6289714	6335647	0.999788	0.999561	0.999927	0.537034	0.999888	0.99988	0.992846	7.07456e-05	0.999862	0.18476	0.607618	0.999654	0.989244	0.37857	0.000303919	0.999842	0.0465083
chr2L	126	6335648	6382166	0.999739	0.99974	0.999937	0.747539	0.999804	0.999896	0.996069	8.07054e-05	0.999877	0.225314	0.679816	0.999681	0.990928	0.376566	0.000146271	0.999902	0.0400414
chr2L	127	6382167	6445482	0.999466	0.9997	0.999935	0.816832	0.999604	0.999876	0.996735	5.75994e-05	0.999873	0.236127	0.699691	0.999435	0.990485	0.360847	0.000164598	0.999896	0.0391624
chr2L	128	6445483	6494877	0.999754	0.999348	0.999919	0.837818	0.999084	0.999915	0.996197	0.000112787	0.999878	0.235162	0.703539	0.998658	0.987138	0.314931	0.000347089	0.999883	0.0342913
chr2L	129	6494878	6541663	0.999789	0.998419	0.999894	0.845808	0.997396	0.999926	0.994134	0.000171722	0.999827	0.220772	0.696597	0.996422	0.975508	0.153891	0.00100998	0.99985	0.03747
chr2L	130	6541664	6582485	0.999817	0.995613	0.999809	0.844149	0.996754	0.999912	0.986637	0.000745719	0.999858	0.169288	0.691389	0.988935	0.975271	0.114288	0.000881603	0.999843	0.0565263
chr2L	131	6582486	6624137	0.999813	0.996288	0.999763	0.839413	0.998821	0.999888	0.977912	0.0016055	0.999798	0.149331	0.708727	0.980234	0.980229	0.100513	0.000986645	0.999782	0.0689044
chr2L	132	6624138	6699879	0.999854	0.995832	0.999489	0.851161	0.99941	0.999853	0.975054	0.00208404	0.999819	0.150654	0.747339	0.964899	0.988273	0.099422	0.00104819	0.999787	0.152034
chr2L	133	6699880	6743373	0.999772	0.993921	0.99857	0.852069	0.999593	0.999728	0.96614	0.00121636	0.999868	0.141674	0.76108	0.914316	0.990245	0.090757	0.00107011	0.999859	0.198893
chr2L	134	6743374	6777903	0.999541	0.994436	0.998657	0.842879	0.999435	0.999396	0.935233	0.000766178	0.999842	0.108292	0.762909	0.751487	0.989789	0.0571358	0.000964217	0.999856	0.21964
chr2L	135	6777904	6817193	0.999286	0.995698	0.997878	0.820768	0.999276	0.999735	0.889141	0.00024302	0.999903	0.0290504	0.76785	0.726107	0.985914	0.0317798	0.000654637	0.999882	0.22449
chr2L	136	6817194	6856649	0.999406	0.995959	0.998367	0.741775	0.999627	0.999839	0.876674	0.000304395	0.999926	0.00670881	0.800987	0.727492	0.986385	0.016422	0.000235386	0.999918	0.218095
chr2L	137	6856650	6910571	0.999129	0.994892	0.997999	0.719894	0.999645	0.999809	0.870539	0.00044054	0.999937	0.0033513	0.809168	0.716338	0.984228	0.0113587	6.78138e-05	0.999925	0.200392
chr2L	138	6910572	6976404	0.999387	0.990335	0.997671	0.713032	0.999328	0.999618	0.844298	0.000124183	0.999938	0.00256028	0.833041	0.674461	0.983199	0.00962407	8.8023e-05	0.999901	0.178989
chr2L	139	6976405	7017482	0.999208	0.983608	0.995846	0.686568	0.998182	0.999561	0.75121	6.67198e-05	0.99993	0.0039093	0.838992	0.633151	0.977797	0.0121709	0.000203038	0.999919	0.180223
chr2L	140	7017483	7061522	0.99955	0.963229	0.991802	0.593902	0.994097	0.999133	0.707541	0.000118125	0.999905	0.00336624	0.835908	0.494719	0.958013	0.0114736	0.000169996	0.999905	0.197617
chr2L	141	7061523	7094954	0.999801	0.943277	0.990363	0.267798	0.980493	0.997518	0.664471	0.000603893	0.999865	0.00442211	0.818382	0.461265	0.888636	0.00699659	0.000534519	0.99985	0.199518
chr2L	142	7094955	7131908	0.999891	0.88417	0.985818	0.164339	0.942189	0.992766	0.523625	0.000274413	0.99991	0.0046758	0.770092	0.350739	0.848778	0.0029964	0.00118057	0.999784	0.189649
chr2L	143	7131909	7170346	0.999898	0.717519	0.969966	0.0836929	0.937327	0.980367	0.0963874	6.19593e-05	0.999928	0.00392361	0.754761	0.241432	0.70775	0.00251843	0.00392723	0.999795	0.187153
chr2L	144	7170347	7209496	0.999845	0.683649	0.920054	0.0159753	0.933642	0.976407	0.0278074	3.77431e-05	0.999935	0.00337398	0.739534	0.149516	0.589108	0.00183741	0.00601042	0.999875	0.170799
chr2L	145	7209497	7248148	0.99973	0.608615	0.832129	0.00629858	0.932912	0.977161	0.0177557	5.72547e-05	0.999935	0.00348852	0.736999	0.133178	0.491318	0.00117708	0.00859097	0.999854	0.119349
chr2L	146	7248149	7295081	0.999411	0.35788	0.797164	0.00516938	0.923613	0.980042	0.0098375	0.000107928	0.99992	0.0034004	0.717376	0.134957	0.394658	0.00129774	0.0114622	0.999825	0.112966
chr2L	147	7295082	7353208	0.999019	0.146695	0.794824	0.00280933	0.916323	0.983804	0.00501678	0.000203469	0.999885	0.0025264	0.68556	0.136667	0.324024	0.000872934	0.0127699	0.999877	0.0914453
chr2L	148	7353209	7392421	0.997916	0.115585	0.815644	0.00278637	0.90256	0.992685	0.00489889	0.000216731	0.99983	0.00300302	0.676591	0.163447	0.315915	0.000363587	0.0138787	0.999856	0.0793022
chr2L	149	7392422	7434926	0.994144	0.113277	0.879153	0.00272829	0.904764	0.995073	0.00886261	0.000856789	0.999754	0.00592238	0.670187	0.23171	0.317185	0.000552549	0.0167925	0.99977	0.0671421
chr2L	150	7434927	7470974	0.980919	0.0978366	0.898369	0.000694279	0.898933	0.995739	0.00971947	0.000509821	0.999733	0.00599995	0.639805	0.250629	0.318492	0.000993404	0.0247423	0.999744	0.0394089
chr2L	151	7470975	7511139	0.976032	0.0430318	0.90247	0.000508295	0.877568	0.995968	0.00762615	0.000990513	0.999765	0.00440377	0.553737	0.253318	0.306276	0.00134211	0.0259742	0.999773	0.0359159
chr2L	152	7511140	7557227	0.977473	0.0233134	0.907602	0.00115896	0.859168	0.996614	0.00583462	0.00139694	0.999867	0.00265341	0.48031	0.284619	0.285406	0.00163745	0.028255	0.999864	0.0221495
chr2L	153	7557228	7599543	0.984497	0.0211441	0.942748	0.00297691	0.843645	0.997626	0.00500605	0.0014657	0.99987	0.000700055	0.417673	0.321044	0.267792	0.0013531	0.030986	0.999873	0.0210425
chr2L	154	7599544	7638439	0.988383	0.0238582	0.953619	0.00501793	0.843849	0.9975	0.0053348	0.000651618	0.999826	0.000437312	0.382988	0.357835	0.259143	0.00111646	0.0328175	0.999823	0.0183488
chr2L	155	7638440	7677376	0.992521	0.0453221	0.955685	0.00963488	0.861578	0.996306	0.00572508	0.000321575	0.999813	0.000464045	0.372974	0.559971	0.236867	0.00139437	0.0394892	0.999863	0.0155036
chr2L	156	7677377	7718976	0.99482	0.113099	0.959528	0.0199196	0.902312	0.997899	0.0112547	0.000122971	0.999807	0.000345684	0.366077	0.847165	0.200806	0.001605	0.0475764	0.999835	0.0171183
chr2L	157	7718977	7767022	0.995011	0.158233	0.9734	0.0760552	0.914444	0.998237	0.0189134	0.000148065	0.999857	9.72101e-05	0.361443	0.955093	0.170479	0.00250976	0.0491668	0.99989	0.0248665
chr2L	158	7767023	7811846	0.99415	0.404052	0.977418	0.275223	0.91648	0.997743	0.0292973	0.00017106	0.999797	9.85958e-05	0.336641	0.985655	0.134247	0.00189083	0.0472663	0.999915	0.0259281
chr2L	159	7811847	7860533	0.997387	0.479651	0.993376	0.340404	0.918756	0.995646	0.0396157	0.000544215	0.999577	0.000285681	0.248308	0.995275	0.131166	0.00108173	0.038526	0.999922	0.0225279
chr2L	160	7860534	7914581	0.998592	0.522131	0.99801	0.358877	0.921272	0.988136	0.0414819	0.000624863	0.99895	0.00128924	0.236038	0.998493	0.141346	0.00116537	0.0297088	0.999894	0.0210437
chr2L	161	7914582	7963654	0.999425	0.565129	0.999332	0.393185	0.924922	0.987692	0.0571185	0.00101815	0.999282	0.001638	0.228132	0.999454	0.15138	0.0011516	0.0239823	0.999908	0.0143699
chr2L	162	7963655	8009212	0.999658	0.577215	0.999751	0.610889	0.960425	0.991331	0.0784848	0.000333882	0.999558	0.00368642	0.233095	0.999695	0.164627	0.00196316	0.010488	0.999927	0.0145455
chr2L	163	8009213	8061931	0.999757	0.574942	0.999873	0.676928	0.970347	0.997267	0.0833929	0.000194642	0.999809	0.00667598	0.24481	0.999662	0.180295	0.00311707	0.00732917	0.999933	0.010845
chr2L	164	8061932	8119428	0.999739	0.560345	0.999887	0.697789	0.972728	0.999112	0.0810526	8.46897e-05	0.99988	0.00678294	0.243898	0.999315	0.181728	0.00270289	0.00455742	0.999932	0.00885507
chr2L	165	8119429	8162435	0.999581	0.506133	0.99989	0.70464	0.971979	0.999657	0.0706103	3.71867e-05	0.999888	0.00697817	0.237504	0.998126	0.171559	0.00468387	0.00158346	0.999923	0.0109259
chr2L	166	8162436	8202222	0.999116	0.332647	0.999853	0.701446	0.965501	0.999794	0.0317584	3.41357e-05	0.999823	0.00442515	0.208232	0.994381	0.133587	0.00437109	0.000573462	0.999932	0.025858
chr2L	167	8202223	8247976	0.998017	0.30765	0.999669	0.680202	0.959297	0.999745	0.0133517	4.37859e-05	0.999602	0.00215607	0.189231	0.98125	0.12927	0.00473484	0.000636789	0.999936	0.0672875
chr2L	168	8247977	8291414	0.994076	0.220414	0.999526	0.603452	0.935895	0.999462	0.00262582	9.86738e-05	0.998893	0.00180935	0.12707	0.936758	0.108456	0.00376075	0.000594384	0.999934	0.346041
chr2L	169	8291415	8331760	0.994078	0.207554	0.998927	0.582404	0.931942	0.999766	0.0010849	0.000512125	0.999621	0.00140674	0.0726261	0.931388	0.0906699	0.00258411	0.000441635	0.999935	0.473355
chr2L	170	8331761	8377538	0.99803	0.171477	0.997378	0.581473	0.91705	0.999817	0.00111219	0.000140467	0.999817	0.00106433	0.0631394	0.928264	0.0757711	0.00120445	0.000134457	0.999918	0.58075
chr2L	171	8377539	8438003	0.999268	0.165762	0.996526	0.569128	0.899422	0.999789	0.00305581	0.00013552	0.999891	0.000376626	0.0328061	0.914446	0.0243876	0.00092718	0.000186155	0.999919	0.610616
chr2L	172	8438004	8489873	0.999619	0.165985	0.993134	0.532399	0.845619	0.999658	0.00303627	0.000148012	0.999897	0.000445395	0.0280741	0.864239	0.0169398	0.00102994	0.000102978	0.999901	0.626648
chr2L	173	8489874	8537189	0.999682	0.155433	0.981092	0.435967	0.657121	0.999121	0.00392391	0.000616235	0.999828	0.000891205	0.0276993	0.693738	0.01725	0.0031386	4.39057e-05	0.999823	0.710587
chr2L	174	8537190	8586775	0.999564	0.120418	0.944901	0.16757	0.166369	0.998438	0.00334067	0.000210103	0.999841	0.000414772	0.0224665	0.238448	0.0143701	0.00365874	7.78696e-05	0.999825	0.856032
chr2L	175	8586776	8637506	0.998977	0.0856593	0.828431	0.115916	0.0955998	0.995806	0.00346179	9.27822e-05	0.999791	0.000674566	0.0203658	0.165518	0.011292	0.00422484	7.6209e-05	0.999888	0.897048
chr2L	176	8637507	8683763	0.999574	0.0720219	0.440516	0.0928744	0.0621706	0.995463	0.00462416	7.72704e-05	0.999532	0.00244561	0.019142	0.136462	0.00961173	0.00398067	0.000302933	0.999898	0.92017
chr2L	177	8683764	8738134	0.999718	0.0685339	0.385172	0.0763154	0.052999	0.995084	0.00419449	0.000273241	0.99874	0.00799075	0.0184548	0.123261	0.00931904	0.00477361	0.00137771	0.999847	0.928532
chr2L	178	8738135	8775203	0.999846	0.0532899	0.236834	0.0235116	0.0209527	0.994087	0.000936131	7.33973e-05	0.996065	0.00944486	0.0125607	0.0759811	0.00642015	0.00367495	0.00122577	0.999876	0.928619
chr2L	179	8775204	8820140	0.999869	0.0524146	0.112448	0.0126686	0.015253	0.989572	0.00032571	3.64132e-05	0.996756	0.0111342	0.00995774	0.0627454	0.00339554	0.0027684	0.00100635	0.999883	0.932532
chr2L	180	8820141	8871184	0.999887	0.0484443	0.022443	0.00410324	0.0160457	0.989447	9.68368e-05	5.12372e-05	0.996183	0.0252007	0.00816031	0.0581995	0.0011049	0.00196293	0.000692482	0.99988	0.930103
chr2L	181	8871185	8914912	0.999875	0.0537018	0.00506738	0.00308197	0.027373	0.987239	6.83127e-05	5.42725e-05	0.99323	0.0417524	0.00654517	0.0607479	0.000251121	0.000968505	0.000174814	0.99989	0.91737
chr2L	182	8914913	8963902	0.999773	0.056362	0.00264119	0.00263357	0.0298282	0.979243	0.000192252	3.37047e-05	0.993222	0.0830487	0.00798321	0.0565535	0.000189457	0.00098373	9.04963e-05	0.999893	0.898088
chr2L	183	8963903	9011494	0.999527	0.0542408	0.00260879	0.000425963	0.0274748	0.957812	6.46757e-05	7.3503e-05	0.991139	0.106118	0.00740708	0.0387757	0.000588697	0.00269557	9.68023e-05	0.999834	0.879201
chr2L	184	9011495	9058927	0.998702	0.0451632	0.00173008	0.000119604	0.0177114	0.917503	0.000105872	7.59101e-05	0.987294	0.111282	0.00416575	0.00692634	0.00014941	0.00254583	0.000141188	0.999859	0.863973
chr2L	185	9058928	9099163	0.99871	0.04233	0.0025092	0.000121679	0.0174028	0.898854	0.000400525	0.000269215	0.978659	0.121211	0.00426902	0.00238164	8.80909e-05	0.00261624	0.000676192	0.999839	0.809497
chr2L	186	9099164	9136294	0.997899	0.0286647	0.00692792	0.00019218	0.01846	0.880593	0.000417797	0.000656821	0.952986	0.177138	0.00472895	0.0019337	0.000249199	0.00260191	0.00113496	0.999905	0.643907
chr2L	187	9136295	9173758	0.998909	0.0240932	0.0134828	0.000739863	0.0203237	0.874661	0.000295193	0.00105099	0.867364	0.233573	0.00500292	0.00150351	0.000263838	0.00254301	0.00152798	0.999919	0.351927
chr2L	188	9173759	9223897	0.999336	0.00660533	0.0148377	0.000522721	0.0290826	0.876282	0.000429513	0.000970114	0.610991	0.2899	0.0102447	0.00099254	0.000912838	0.00260633	0.000644049	0.999915	0.309213
chr2L	189	9223898	9268888	0.999689	0.00422157	0.0262437	0.000204306	0.0376493	0.878057	0.00151511	0.00026389	0.22815	0.325157	0.0290192	0.000712153	0.0010288	0.0026783	0.000177946	0.99991	0.305805
chr2L	190	9268889	9314403	0.999767	0.00392193	0.106346	0.000258729	0.0993161	0.903041	0.00124516	8.44801e-05	0.133576	0.368601	0.0516168	0.00132997	0.00104124	0.00288392	5.06079e-05	0.999913	0.283354
chr2L	191	9314404	9353385	0.999848	0.00616075	0.647843	0.00021508	0.41884	0.933633	0.00198925	0.000106336	0.120319	0.395565	0.0768121	0.0022825	0.000529659	0.00238322	5.54614e-05	0.999913	0.26388
chr2L	192	9353386	9400448	0.999848	0.00822901	0.806411	0.000568172	0.599985	0.975765	0.00197502	6.16824e-05	0.0723437	0.453877	0.130217	0.00525815	0.000289248	0.0014742	0.000138874	0.999871	0.192598
chr2L	193	9400449	9441062	0.999873	0.0161089	0.861757	0.00120542	0.653296	0.99155	0.00454249	2.80568e-05	0.0653999	0.472198	0.14471	0.0080695	0.000476674	0.00200794	6.26145e-05	0.999893	0.175778
chr2L	194	9441063	9490873	0.999829	0.0201821	0.881669	0.00519384	0.667213	0.996748	0.00460689	2.31147e-05	0.065827	0.473424	0.146106	0.00873595	0.00221022	0.00260492	0.00014219	0.99989	0.178728
chr2L	195	9490874	9535905	0.999844	0.0321989	0.888338	0.0161825	0.756625	0.998168	0.00237915	3.365e-05	0.0618451	0.482847	0.144477	0.0153496	0.00396791	0.00389983	9.33453e-05	0.999875	0.171026
chr2L	196	9535906	9575483	0.999752	0.0577065	0.942369	0.0466178	0.782911	0.998608	0.00243935	3.42605e-05	0.0633424	0.495105	0.16324	0.0572056	0.0135173	0.00605648	0.000235656	0.99977	0.180359
chr2L	197	9575484	9615967	0.999716	0.0644851	0.959202	0.0667234	0.788682	0.998892	0.00212607	9.57816e-05	0.067528	0.50182	0.184299	0.0729806	0.0256208	0.00843477	0.000235178	0.999723	0.180369
chr2L	198	9615968	9653357	0.999676	0.115023	0.963393	0.0834261	0.842254	0.998641	0.00274769	0.000173586	0.081713	0.506567	0.30176	0.129946	0.0375307	0.0174855	0.000329786	0.999735	0.171553
chr2L	199	9653358	9694406	0.999673	0.205143	0.971719	0.0885666	0.85711	0.997241	0.0085065	0.000702153	0.106593	0.505429	0.441477	0.145501	0.0523409	0.0297381	0.000284388	0.999825	0.138596
chr2L	200	9694407	9744602	0.999675	0.231095	0.974321	0.0863755	0.86112	0.9929	0.0101941	0.000400012	0.112661	0.530698	0.488437	0.147322	0.12491	0.0661131	0.000669322	0.999909	0.0218143
chr2L	201	9744603	9787256	0.999446	0.403886	0.973548	0.0893706	0.866862	0.99331	0.0229805	0.0006605	0.110584	0.564862	0.628317	0.178563	0.212203	0.106753	0.00138665	0.999928	0.00454441
chr2L	202	9787257	9843002	0.99867	0.452491	0.968584	0.0842965	0.863363	0.992252	0.0272621	0.000197592	0.0971921	0.705798	0.697516	0.186283	0.396684	0.117701	0.00125863	0.999922	0.00122061
chr2L	203	9843003	9916959	0.996164	0.650926	0.96875	0.0860625	0.876612	0.991937	0.0566794	8.44302e-05	0.047985	0.794996	0.778689	0.23632	0.513378	0.13084	0.00134704	0.999925	0.00051526
chr2L	204	9916960	9961613	0.995615	0.818454	0.981716	0.0934462	0.958565	0.997103	0.248585	3.04686e-05	0.028242	0.899578	0.9133	0.576456	0.83731	0.158731	0.0035551	0.99992	0.000111839
chr2L	205	9961614	10013802	0.998697	0.86884	0.992796	0.0937377	0.984396	0.998849	0.442631	2.71155e-05	0.0217843	0.92911	0.9517	0.681309	0.930076	0.168363	0.00353269	0.999909	8.48848e-05
chr2L	206	10013803	10053011	0.999567	0.883374	0.99597	0.0856069	0.991774	0.999448	0.497727	5.24103e-05	0.00975305	0.940025	0.962335	0.716414	0.962946	0.238875	0.0019227	0.999893	0.000296724
chr2L	207	10053012	10092454	0.999808	0.966099	0.998796	0.0900726	0.996792	0.999648	0.69468	0.000231298	0.00751502	0.980788	0.986822	0.910064	0.98161	0.714051	0.0016901	0.999834	0.00131513
chr2L	208	10092455	10133939	0.999875	0.989794	0.999598	0.0907566	0.998528	0.999712	0.749737	0.00117417	0.0051097	0.992802	0.994408	0.965396	0.992763	0.877296	0.00126447	0.999777	0.00127771
chr2L	209	10133940	10186748	0.999856	0.996613	0.999834	0.090289	0.998946	0.999759	0.76978	0.00439058	0.00329593	0.99631	0.997057	0.983618	0.996318	0.938095	0.00108882	0.999786	0.000356545
chr2L	210	10186749	10227539	0.999789	0.998497	0.9999	0.106846	0.999228	0.999862	0.774138	0.00496534	0.00354462	0.998601	0.998876	0.995236	0.998641	0.956829	0.000831326	0.999872	0.000245182
chr2L	211	10227540	10276847	0.999482	0.999065	0.999921	0.199088	0.999026	0.999879	0.820674	0.0058359	0.00606272	0.999472	0.99956	0.998583	0.999517	0.962623	0.000479853	0.999884	0.000116367
chr2L	212	10276848	10325477	0.999155	0.999161	0.999925	0.276782	0.999522	0.999815	0.85997	0.00652479	0.00615214	0.999706	0.999737	0.999539	0.99974	0.981567	0.000103106	0.999833	0.000166844
chr2L	213	10325478	10373021	0.999586	0.999665	0.999936	0.3118	0.999692	0.999734	0.882007	0.00746723	0.00809439	0.999705	0.999762	0.999802	0.999799	0.987396	7.58818e-05	0.999873	0.000707063
chr2L	214	10373022	10423813	0.999811	0.999786	0.999938	0.320847	0.99969	0.999703	0.887195	0.0139552	0.00986598	0.999734	0.999614	0.999886	0.999742	0.991215	0.000182763	0.999879	0.000480443
chr2L	215	10423814	10463921	0.999873	0.999763	0.999933	0.318126	0.999711	0.999715	0.885431	0.0149752	0.00874609	0.999709	0.99939	0.999906	0.999465	0.992208	0.000536119	0.999903	0.000950293
chr2L	216	10463922	10500130	0.999871	0.999582	0.999931	0.297037	0.999755	0.999773	0.878341	0.0125279	0.00702645	0.999707	0.999063	0.99989	0.998709	0.99155	0.000114419	0.999913	0.000421024
chr2L	217	10500131	10534838	0.99983	0.998881	0.999937	0.285876	0.999606	0.999733	0.850734	0.0140541	0.00890653	0.99942	0.99767	0.999791	0.996236	0.988092	7.5216e-05	0.9999	0.000193903
chr2L	218	10534839	10575623	0.999779	0.997744	0.999934	0.24797	0.998971	0.999431	0.752385	0.0284666	0.0101688	0.998356	0.992681	0.999426	0.987981	0.975412	0.000217741	0.999812	0.000263855
chr2L	219	10575624	10624787	0.999793	0.998636	0.999933	0.215523	0.999102	0.999726	0.413392	0.0403893	0.00851527	0.996798	0.989671	0.999541	0.985101	0.974034	0.0010855	0.999799	0.000377106
chr2L	220	10624788	10669526	0.999876	0.999534	0.99992	0.187751	0.999664	0.999799	0.329809	0.0479494	0.0100702	0.995442	0.988845	0.999606	0.98657	0.97338	0.00135134	0.999857	0.00155931
chr2L	221	10669527	10711861	0.999894	0.999776	0.999867	0.187193	0.999801	0.99969	0.318631	0.0482009	0.00939812	0.997244	0.988895	0.999354	0.991852	0.970854	0.00151752	0.999837	0.00301677
chr2L	222	10711862	10764780	0.999864	0.99986	0.999759	0.183201	0.999822	0.99956	0.325501	0.0415803	0.0111869	0.997668	0.98659	0.998634	0.992999	0.960233	0.0025515	0.999872	0.00267096
chr2L	223	10764781	10819440	0.999771	0.99986	0.999504	0.162146	0.999871	0.999451	0.32179	0.016262	0.011796	0.997475	0.979136	0.996978	0.993408	0.938571	0.00199553	0.999856	0.004849
chr2L	224	10819441	10868701	0.999739	0.999768	0.999797	0.136837	0.999818	0.999264	0.321161	0.0118	0.0201183	0.996101	0.977988	0.995548	0.991919	0.906226	0.00134738	0.999853	0.0114339
chr2L	225	10868702	10922736	0.999713	0.999754	0.999862	0.134524	0.999585	0.998321	0.347683	0.00994565	0.0233713	0.994605	0.977036	0.990372	0.98567	0.792708	0.000668415	0.999784	0.0128809
chr2L	226	10922737	10975824	0.999747	0.999494	0.999885	0.118229	0.998918	0.996935	0.352466	0.00792368	0.0248789	0.991773	0.971153	0.975579	0.967723	0.448588	0.000225259	0.999782	0.0195353
chr2L	227	10975825	11037950	0.999834	0.998809	0.99983	0.104231	0.99671	0.992865	0.346037	0.00784674	0.0221186	0.993113	0.970707	0.92551	0.966456	0.382479	9.80077e-05	0.999845	0.0205564
chr2L	228	11037951	11094575	0.999862	0.997025	0.999605	0.0566679	0.991699	0.980966	0.316738	0.00487433	0.0146798	0.992782	0.964981	0.761156	0.95834	0.372155	0.000208237	0.999897	0.0297474
chr2L	229	11094576	11160780	0.999861	0.994477	0.998824	0.0465232	0.982946	0.979137	0.295692	0.00532403	0.0147865	0.992951	0.959445	0.737642	0.955664	0.353955	0.000114469	0.999883	0.094739
chr2L	230	11160781	11202346	0.999856	0.985572	0.996477	0.0110587	0.956535	0.973705	0.221227	0.00351212	0.0108978	0.991138	0.943929	0.656587	0.945481	0.303815	0.00030027	0.99985	0.531751
chr2L	231	11202347	11284772	0.9999	0.982462	0.997184	0.00454911	0.914927	0.970653	0.109701	0.00395521	0.00933357	0.988137	0.928594	0.637654	0.93548	0.253595	0.000347294	0.999907	0.686738
chr2L	232	11284773	11333801	0.999879	0.978823	0.996776	0.0019688	0.89195	0.968585	0.0654788	0.00462899	0.00233736	0.983309	0.916966	0.639885	0.925657	0.17382	0.000284664	0.999915	0.898644
chr2L	233	11333802	11384505	0.999833	0.966935	0.994486	0.000321701	0.891611	0.958281	0.0599419	0.00648557	0.00109822	0.978679	0.917239	0.645581	0.919151	0.129186	0.000711075	0.99989	0.966103
chr2L	234	11384506	11431627	0.999852	0.928808	0.995839	9.47202e-05	0.895739	0.955917	0.0384416	0.00595132	0.00131504	0.975203	0.927118	0.665863	0.912816	0.0978128	0.00112838	0.999885	0.98537
chr2L	235	11431628	11479521	0.999782	0.814555	0.997416	0.000122089	0.896256	0.961697	0.0127073	0.00191446	0.00156892	0.978503	0.953672	0.741438	0.918954	0.0751781	0.00102193	0.999818	0.991056
chr2L	236	11479522	11523594	0.999776	0.794263	0.9976	3.88387e-05	0.898043	0.987752	0.00748906	0.000770457	0.00182956	0.982706	0.962218	0.831804	0.930429	0.0523701	0.000810875	0.999842	0.992724
chr2L	237	11523595	11588337	0.999758	0.72333	0.996651	2.45373e-05	0.909538	0.995564	0.00213439	0.000403112	0.00153833	0.982884	0.963687	0.892305	0.932365	0.0499302	0.000840787	0.999782	0.992489
chr2L	238	11588338	11638393	0.999754	0.472932	0.992973	2.71714e-05	0.91177	0.998294	0.000588787	0.000406706	0.000647655	0.979245	0.960929	0.909848	0.927952	0.0507243	0.000673807	0.999797	0.99004
chr2L	239	11638394	11689711	0.999706	0.427272	0.992353	6.47041e-05	0.907606	0.999322	0.000216212	0.000334422	0.000690495	0.976618	0.95531	0.94092	0.928925	0.0684134	0.000653581	0.999882	0.983044
chr2L	240	11689712	11754181	0.999683	0.424371	0.996727	0.000239057	0.888327	0.999674	0.000119725	0.000155806	0.0011397	0.966119	0.946018	0.954951	0.922435	0.0722002	0.00050997	0.999887	0.979424
chr2L	241	11754182	11825532	0.999659	0.403304	0.99795	0.00148587	0.822064	0.999774	0.000238623	0.000101492	0.00324104	0.930627	0.926756	0.958392	0.900723	0.0688248	0.00103972	0.99986	0.966321
chr2L	242	11825533	11866102	0.999666	0.333124	0.998131	0.00254536	0.648568	0.999748	0.000209257	0.000232646	0.00320023	0.914252	0.882953	0.95653	0.897044	0.0671289	0.00265824	0.999833	0.922342
chr2L	243	11866103	11917474	0.999718	0.148815	0.997289	0.00584305	0.443064	0.999488	0.000728996	0.000107546	0.001099	0.914226	0.815734	0.946075	0.897255	0.0629034	0.00458552	0.999784	0.879047
chr2L	244	11917475	11963810	0.999766	0.0969984	0.99914	0.00950479	0.398101	0.998553	0.000348085	0.000104766	0.00101607	0.914369	0.617448	0.943584	0.897629	0.0549539	0.00542666	0.999802	0.74707
chr2L	245	11963811	12051974	0.999872	0.0456203	0.999696	0.013698	0.280598	0.997196	0.000561874	4.99574e-05	0.00134449	0.91203	0.419209	0.945105	0.903329	0.0468228	0.00626112	0.999891	0.590789
chr2L	246	12051975	12104220	0.999883	0.0249856	0.999861	0.0139969	0.25703	0.992286	0.000489724	0.000106195	0.00116905	0.914239	0.381526	0.94042	0.910732	0.0490731	0.00735981	0.999895	0.562811
chr2L	247	12104221	12142395	0.999851	0.0202278	0.999899	0.0105159	0.247104	0.974764	0.000926513	0.000311468	0.00158233	0.909239	0.370356	0.921842	0.909953	0.045385	0.00862071	0.999845	0.555614
chr2L	248	12142396	12175232	0.999908	0.00359908	0.999924	0.00608021	0.214614	0.93295	0.000552854	0.000168366	0.000722405	0.895188	0.334286	0.858778	0.906248	0.0327899	0.00718668	0.999882	0.563674
chr2L	249	12175233	12211641	0.999917	0.000943616	0.999919	0.00445757	0.102955	0.785256	0.000288621	0.00022243	0.000571032	0.846038	0.333284	0.638096	0.889897	0.0290441	0.00935664	0.9999	0.565402
chr2L	250	12211642	12261576	0.999903	0.000608019	0.999897	0.00437641	0.0755594	0.564766	0.000304948	7.60431e-05	0.0010913	0.707177	0.337106	0.249037	0.880759	0.0259556	0.0234611	0.99986	0.605021
chr2L	251	12261577	12305563	0.999894	0.000739445	0.999802	0.00434161	0.0528931	0.530062	0.000232626	0.000104386	0.00217542	0.59092	0.342849	0.153175	0.865531	0.0201974	0.040053	0.999879	0.615184
chr2L	252	12305564	12353399	0.99987	0.000987655	0.999864	0.00616049	0.046204	0.527428	0.000133009	8.6655e-05	0.00173829	0.493586	0.350082	0.129961	0.855068	0.0150673	0.0819904	0.999837	0.614784
chr2L	253	12353400	12400801	0.999857	0.00316071	0.999809	0.00938283	0.0408358	0.550654	0.000338295	0.000150903	0.00138818	0.339669	0.357255	0.126817	0.837694	0.0105873	0.139561	0.999893	0.612751
chr2L	254	12400802	12451995	0.999893	0.0184739	0.999668	0.0199031	0.0352802	0.713661	0.000715049	0.000744023	0.00198259	0.0964505	0.35944	0.13513	0.809718	0.00304662	0.196985	0.999899	0.598743
chr2L	255	12451996	12497421	0.999877	0.0223485	0.99929	0.0224225	0.0139676	0.762541	0.000148002	0.00101479	0.00335753	0.0516831	0.370334	0.134067	0.809531	0.00202703	0.212423	0.99985	0.607106
chr2L	256	12497422	12547121	0.999877	0.0221325	0.998026	0.021198	0.0109935	0.775324	9.14612e-05	0.000217038	0.00289069	0.0438999	0.367349	0.120497	0.810799	0.00202512	0.216753	0.999848	0.603241
chr2L	257	12547122	12596817	0.999829	0.0254199	0.993718	0.0176492	0.0113775	0.793718	0.000124253	0.000149314	0.000979529	0.0381768	0.384643	0.103996	0.808542	0.00204351	0.214954	0.999788	0.60875
chr2L	258	12596818	12644563	0.999864	0.0244847	0.979857	0.0149125	0.00843264	0.91394	0.000320901	0.000114104	0.0007601	0.0332968	0.394329	0.103763	0.807343	0.00199903	0.209114	0.999796	0.604165
chr2L	259	12644564	12688443	0.999893	0.0263203	0.936322	0.0125826	0.00609055	0.948205	0.000105641	0.000257683	0.00167339	0.0337266	0.390921	0.111872	0.826707	0.00277038	0.203271	0.999884	0.579419
chr2L	260	12688444	12747097	0.999903	0.0353479	0.795329	0.0110567	0.00576438	0.96376	0.000106725	0.00014223	0.00129098	0.0346212	0.389075	0.134045	0.861181	0.00357205	0.20526	0.999915	0.488995
chr2L	261	12747098	12806779	0.999918	0.037886	0.546817	0.00361717	0.00239506	0.968141	0.000100299	6.41254e-05	0.00211594	0.0485434	0.416599	0.139021	0.873849	0.00762988	0.213369	0.999911	0.464422
chr2L	262	12806780	12872259	0.99991	0.0594473	0.511832	0.00183486	0.00226481	0.984079	0.000395685	9.11923e-05	0.002312	0.0622813	0.451355	0.15953	0.883308	0.0122198	0.225599	0.999922	0.45867
chr2L	263	12872260	12954649	0.999896	0.0773934	0.504045	0.0014023	0.00194286	0.988568	0.000638021	6.18211e-05	0.00261865	0.08123	0.491882	0.203686	0.892618	0.0166675	0.237718	0.999916	0.477106
chr2L	264	12954650	13024682	0.99991	0.190941	0.507889	0.00134253	0.00323416	0.990985	0.00184516	4.11227e-05	0.00390877	0.102124	0.549173	0.383336	0.915366	0.0228195	0.253038	0.999911	0.478233
chr2L	265	13024683	13078761	0.999923	0.242546	0.556889	0.00131137	0.0129396	0.990868	0.00262571	4.25337e-05	0.00415683	0.131124	0.783108	0.44013	0.927996	0.0625781	0.288934	0.999916	0.465842
chr2L	266	13078762	13130803	0.999922	0.314044	0.61649	0.00144925	0.0802505	0.997018	0.00895703	7.03417e-05	0.00686127	0.148995	0.931311	0.836201	0.9408	0.0874739	0.311057	0.999918	0.46959
chr2L	267	13130804	13203722	0.999897	0.660638	0.765454	0.00336221	0.405443	0.998756	0.0519052	0.000160203	0.00830332	0.170763	0.973495	0.948377	0.955447	0.150541	0.333375	0.999923	0.469201
chr2L	268	13203723	13263379	0.999847	0.892753	0.812611	0.00905329	0.513493	0.999293	0.0640065	0.00012661	0.0125037	0.175676	0.987503	0.980302	0.958805	0.171323	0.427378	0.999917	0.4875
chr2L	269	13263380	13316105	0.999886	0.9658	0.825241	0.0103607	0.581715	0.999725	0.0663102	0.000147076	0.013297	0.170182	0.995507	0.993915	0.957996	0.176028	0.454606	0.999901	0.498679
chr2L	270	13316106	13373843	0.999907	0.986677	0.89637	0.0087065	0.612318	0.999853	0.0719332	9.93939e-05	0.0120265	0.177866	0.998305	0.997894	0.950407	0.170772	0.472084	0.999888	0.502697
chr2L	271	13373844	13447736	0.999896	0.994749	0.936689	0.00972428	0.618908	0.999848	0.0774703	0.000153161	0.0122804	0.176048	0.999155	0.999064	0.946844	0.163725	0.556843	0.99986	0.510359
chr2L	272	13447737	13517913	0.999869	0.997243	0.947878	0.00793591	0.615111	0.999911	0.0757364	0.000432077	0.00889444	0.161353	0.999491	0.999638	0.933016	0.136462	0.581554	0.999832	0.506253
chr2L	273	13517914	13594035	0.9999	0.998352	0.950053	0.00781949	0.591967	0.999923	0.0631493	9.22044e-05	0.00789305	0.165173	0.999779	0.999783	0.934196	0.116652	0.58556	0.999887	0.509881
chr2L	274	13594036	13668830	0.999922	0.998991	0.94708	0.00719389	0.586808	0.999912	0.0631187	5.158e-05	0.00730257	0.170316	0.999871	0.999733	0.933246	0.115591	0.577843	0.999895	0.513637
chr2L	275	13668831	13720135	0.999917	0.998917	0.944352	0.00776408	0.60174	0.999914	0.0692462	0.000136468	0.00313993	0.191976	0.99988	0.999405	0.94429	0.116478	0.547802	0.999896	0.515618
chr2L	276	13720136	13779312	0.999877	0.99833	0.944463	0.0130882	0.690617	0.999903	0.0679426	0.000538396	0.00288796	0.336949	0.999827	0.999039	0.973393	0.130532	0.459977	0.999852	0.507258
chr2L	277	13779313	13863367	0.999898	0.996106	0.937904	0.0191244	0.723403	0.999864	0.0579036	0.000119331	0.00124345	0.391029	0.999865	0.997633	0.981929	0.161261	0.230728	0.9999	0.476455
chr2L	278	13863368	13915118	0.999891	0.989392	0.93793	0.0198958	0.731636	0.999727	0.0595769	8.70085e-05	0.00131664	0.405455	0.999865	0.992683	0.984805	0.170448	0.127449	0.999906	0.476388
chr2L	279	13915119	13959919	0.999872	0.982959	0.935238	0.0166266	0.729719	0.999608	0.0591252	0.00027275	0.000882064	0.405576	0.999811	0.977691	0.98486	0.169404	0.0734537	0.999864	0.489433
chr2L	280	13959920	14004776	0.99986	0.963726	0.922174	0.00405158	0.715362	0.999538	0.0504642	0.000197171	0.000851501	0.396158	0.999833	0.937889	0.983727	0.156434	0.0470731	0.999898	0.489041
chr2L	281	14004777	14052980	0.9999	0.900467	0.88197	0.00178196	0.673515	0.999111	0.0265843	0.00047377	0.00215877	0.356181	0.9999	0.811443	0.977996	0.114255	0.0378423	0.999907	0.488762
chr2L	282	14052981	14122254	0.99992	0.88283	0.842391	0.000679005	0.524236	0.997503	0.00900588	0.000468462	0.00302017	0.323361	0.999912	0.36945	0.973474	0.0907675	0.0295195	0.999921	0.488595
chr2L	283	14122255	14196873	0.999905	0.819679	0.813755	0.00013115	0.400368	0.996277	0.00199241	0.000777638	0.00300071	0.270824	0.999901	0.0544471	0.966083	0.0531379	0.0158167	0.999931	0.472052
chr2L	284	14196874	14252326	0.999848	0.708254	0.736827	7.20503e-05	0.377404	0.995743	0.000727171	0.000187449	0.000996079	0.233565	0.999822	0.0092187	0.960217	0.038351	0.0096983	0.999928	0.470798
chr2L	285	14252327	14295890	0.99979	0.693063	0.715571	0.000169164	0.380834	0.997957	0.000785231	0.000157302	0.000913291	0.22914	0.999788	0.00228271	0.963646	0.0319886	0.00888325	0.999898	0.498881
chr2L	286	14295891	14335975	0.999809	0.682848	0.645572	0.000107554	0.382497	0.99852	0.00095898	0.000210951	0.00121832	0.2459	0.999832	0.00105523	0.962731	0.0302444	0.00825773	0.999896	0.559628
chr2L	287	14335976	14382669	0.99988	0.684234	0.605491	9.82568e-05	0.382441	0.998785	0.000822917	0.000156221	0.000479321	0.267833	0.999889	0.00126249	0.962675	0.0369287	0.00778693	0.999878	0.752115
chr2L	288	14382670	14436616	0.999867	0.688776	0.500623	4.00209e-05	0.367398	0.998552	0.000373072	6.97103e-05	0.000613803	0.271528	0.9999	0.000285734	0.95737	0.0374901	0.00732555	0.999835	0.914666
chr2L	289	14436617	14494219	0.999891	0.709939	0.487218	2.52126e-05	0.355396	0.998189	0.000245822	4.33757e-05	0.000250089	0.270932	0.999889	0.000198483	0.952398	0.0367663	0.00574689	0.999877	0.96985
chr2L	290	14494220	14547291	0.999888	0.863219	0.478472	3.54393e-05	0.363762	0.997874	0.000661748	0.000115634	0.00022172	0.275631	0.999835	0.000339205	0.948744	0.0360848	0.00428707	0.999877	0.990599
chr2L	291	14547292	14614658	0.999797	0.906981	0.441697	6.3971e-05	0.358842	0.997773	0.00108173	0.000154766	0.000219755	0.324939	0.999784	0.000280331	0.951224	0.0345359	0.00309188	0.999849	0.996611
chr2L	292	14614659	14692314	0.999775	0.918922	0.314043	0.000303896	0.332875	0.996787	0.000634892	0.000554918	0.000259193	0.338234	0.999801	0.000402647	0.948507	0.0307135	0.00200128	0.999815	0.998862
chr2L	293	14692315	14755516	0.999783	0.931188	0.294542	0.000195369	0.290995	0.99602	0.0010017	0.000464777	0.000196587	0.345144	0.999689	0.000383912	0.945974	0.0238051	0.00205887	0.999808	0.999528
chr2L	294	14755517	14800730	0.999645	0.933475	0.224587	0.000100164	0.28047	0.995473	0.00253696	0.000414781	0.000314341	0.35199	0.999507	0.000714328	0.940915	0.0168725	0.00191321	0.999852	0.999787
chr2L	295	14800731	14866081	0.999169	0.929055	0.173441	0.000260436	0.240139	0.992424	0.00248395	8.40327e-05	0.00074718	0.360176	0.998861	0.00012864	0.939735	0.0159195	0.00220987	0.999833	0.999857
chr2L	296	14866082	14927874	0.998277	0.910111	0.150792	0.000275426	0.134673	0.981712	0.000772282	4.90793e-05	0.00325842	0.370408	0.997717	5.43403e-05	0.938734	0.0155164	0.00230334	0.999879	0.999833
chr2L	297	14927875	14994582	0.999262	0.903621	0.145972	0.000156012	0.119634	0.979374	0.000636562	2.70297e-05	0.00403377	0.38281	0.993551	3.0364e-05	0.935485	0.0136584	0.001735	0.999901	0.99964
chr2L	298	14994583	15039803	0.999485	0.90259	0.156512	5.52046e-05	0.122017	0.980028	0.000463624	3.38378e-05	0.00813642	0.398335	0.9919	5.39057e-05	0.934188	0.0116018	0.00187981	0.999906	0.999401
chr2L	299	15039804	15095467	0.999681	0.891148	0.181717	9.26135e-05	0.123087	0.981842	0.000938469	0.000101757	0.0136279	0.417263	0.991155	0.000170761	0.933917	0.00989646	0.00197319	0.999899	0.99846
chr2L	300	15095468	15146960	0.999761	0.885586	0.22577	0.000168626	0.143323	0.984996	0.000839372	0.000542541	0.0462451	0.443098	0.990836	0.000802761	0.934398	0.00897829	0.00312644	0.999823	0.999478
chr2L	301	15146961	15202717	0.999739	0.893093	0.310369	0.000394737	0.287603	0.990357	0.00203342	0.00167008	0.273309	0.458553	0.989778	0.00294147	0.932737	0.0083202	0.00407689	0.999752	0.999795
chr2L	302	15202718	15266949	0.99977	0.932271	0.520911	0.000526837	0.713304	0.996749	0.00355168	0.00213574	0.464872	0.466915	0.987756	0.0082607	0.92858	0.00644237	0.00418602	0.999733	0.999879
chr2L	303	15266950	15322888	0.999862	0.944252	0.640313	0.000238671	0.897652	0.998722	0.00315665	0.00112504	0.534903	0.477436	0.986865	0.0173571	0.911779	0.0057066	0.0026626	0.999766	0.999905
chr2L	304	15322889	15376478	0.999878	0.946589	0.684778	0.000167721	0.967152	0.999486	0.00200892	0.00151116	0.553776	0.473942	0.99224	0.0192297	0.899928	0.00845655	0.00234229	0.999761	0.999872
chr2L	305	15376479	15433047	0.999867	0.942948	0.695722	0.000112088	0.98903	0.999794	0.00108567	0.00405572	0.565401	0.473023	0.993711	0.0366679	0.867121	0.00975947	0.00183118	0.999827	0.999767
chr2L	306	15433048	15495206	0.999813	0.92688	0.746766	0.000312525	0.995355	0.999889	0.00147863	0.0115736	0.658587	0.473972	0.99381	0.0800814	0.864701	0.0108623	0.00143387	0.999789	0.999526
chr2L	307	15495207	15556364	0.999858	0.88362	0.760474	0.00145383	0.997381	0.999916	0.000613542	0.0131021	0.686882	0.475028	0.991974	0.0925551	0.851418	0.0173216	0.00136942	0.999819	0.99865
chr2L	308	15556365	15626658	0.999844	0.866817	0.780112	0.00126047	0.997812	0.99991	0.000749764	0.0115124	0.692771	0.477861	0.990368	0.0970038	0.851709	0.0317976	0.00130497	0.999775	0.999531
chr2L	309	15626659	15754371	0.999822	0.80769	0.913735	0.00138657	0.997173	0.999897	0.00252227	0.0118244	0.694672	0.523373	0.991954	0.0951118	0.840951	0.0367909	0.00110115	0.999783	0.999776
chr2L	310	15754372	15809198	0.999879	0.607692	0.954385	0.000494062	0.994278	0.999865	0.00272509	0.00866243	0.683912	0.745822	0.997059	0.0827987	0.841772	0.0415952	0.00118387	0.999843	0.999807
chr2L	311	15809199	15875320	0.999894	0.540221	0.968029	9.95833e-05	0.986029	0.999752	0.00184287	0.00534339	0.679774	0.809204	0.998841	0.0398478	0.83227	0.0406577	0.00162673	0.999876	0.9997
chr2L	312	15875321	15964230	0.999862	0.473555	0.987038	3.72524e-05	0.957143	0.999323	0.00262933	0.00264222	0.683423	0.828538	0.999314	0.0322884	0.826334	0.0401565	0.00237325	0.999815	0.999409
chr2L	313	15964231	16041872	0.999897	0.373681	0.992346	5.18079e-05	0.880538	0.997951	0.00579408	0.000547998	0.674102	0.833853	0.999656	0.00965234	0.821907	0.0414944	0.00347107	0.999791	0.99948
chr2L	314	16041873	16107574	0.99991	0.22429	0.99416	0.000166641	0.616692	0.993374	0.0224601	0.000107818	0.686364	0.829629	0.999755	0.00657914	0.812953	0.0407839	0.00373893	0.999784	0.99976
chr2L	315	16107575	16183679	0.999905	0.19729	0.994023	0.000136499	0.551976	0.977607	0.0749112	6.12384e-05	0.686303	0.821006	0.999784	0.00387967	0.79757	0.037874	0.00323377	0.999844	0.999805
chr2L	316	16183680	16236877	0.999849	0.18755	0.997002	6.13866e-05	0.455049	0.943201	0.135635	0.00012648	0.682456	0.80615	0.999614	0.00222572	0.782308	0.032146	0.00184819	0.999824	0.999687
chr2L	317	16236878	16300147	0.999882	0.153919	0.998046	0.000132833	0.123397	0.832437	0.152719	0.000322095	0.662662	0.793251	0.999452	0.0018441	0.757352	0.0307508	0.00076764	0.999885	0.999278
chr2L	318	16300148	16359730	0.999838	0.141091	0.99811	0.000130508	0.0744523	0.816309	0.157593	0.000251367	0.626552	0.783575	0.998935	0.000586185	0.717397	0.0272129	0.000857197	0.999881	0.99804
chr2L	319	16359731	16398598	0.99988	0.145034	0.997125	5.36984e-05	0.0448652	0.800516	0.162429	0.000340287	0.562194	0.775809	0.997736	0.000455661	0.653949	0.0268185	0.000992845	0.999861	0.998307
chr2L	320	16398599	16446666	0.999853	0.184866	0.998641	8.47067e-05	0.0357612	0.801831	0.174305	0.00141865	0.553326	0.769286	0.993836	0.000380505	0.553519	0.0263184	0.00104461	0.999778	0.997732
chr2L	321	16446667	16495636	0.999818	0.196229	0.999018	0.000242088	0.0216278	0.791825	0.174348	0.00117741	0.515694	0.764058	0.987485	0.000204894	0.526042	0.0275915	0.00116609	0.999786	0.995336
chr2L	322	16495637	16558307	0.999872	0.217875	0.998822	0.00128509	0.016757	0.787822	0.165487	0.00248379	0.44857	0.768083	0.97753	7.23954e-05	0.481828	0.0287116	0.00241951	0.999737	0.986716
chr2L	323	16558308	16605764	0.999824	0.2215	0.998013	0.00105712	0.0117538	0.777814	0.132043	0.00219718	0.211655	0.773675	0.948373	0.000103335	0.447667	0.0438037	0.00208036	0.999753	0.956403
chr2L	324	16605765	16669046	0.999808	0.213553	0.995144	0.000744148	0.00239287	0.738167	0.0193071	0.00201253	0.0381734	0.780961	0.851337	0.000474124	0.418687	0.0609408	0.00382999	0.999772	0.853684
chr2L	325	16669047	16742118	0.99989	0.221188	0.987032	0.000652233	0.00109856	0.725113	0.00312151	0.0007116	0.0132987	0.783882	0.703825	0.000205026	0.372104	0.0713317	0.00457473	0.999852	0.492054
chr2L	326	16742119	16831337	0.999903	0.286223	0.985336	0.00152444	0.000306445	0.730148	0.00064073	0.000158391	0.00995472	0.78306	0.225939	0.000234559	0.298017	0.0771855	0.0044729	0.99983	0.425719
chr2L	327	16831338	16900857	0.999917	0.305732	0.989349	0.00166149	0.000175202	0.723641	0.000192374	9.55488e-05	0.0034601	0.782354	0.157421	6.37906e-05	0.223847	0.0797466	0.00350285	0.999903	0.418712
chr2L	328	16900858	16973367	0.99992	0.310631	0.992	0.00125888	6.23467e-05	0.695962	8.25403e-05	0.000173005	0.00141375	0.784489	0.121742	6.62419e-05	0.160444	0.0833431	0.00256497	0.999909	0.42677
chr2L	329	16973368	17043760	0.999931	0.30413	0.991995	0.0012583	3.77763e-05	0.676251	0.000183503	8.21735e-05	0.000360758	0.787634	0.0920904	5.13673e-05	0.10621	0.0867695	0.00167871	0.999907	0.421267
chr2L	330	17043761	17105071	0.999938	0.300832	0.993242	0.00276418	7.74413e-05	0.674057	0.000600139	4.11613e-05	0.0001904	0.793191	0.0725625	5.21995e-05	0.0571412	0.090102	0.000833876	0.999899	0.415864
chr2L	331	17105072	17167095	0.999936	0.308154	0.997508	0.00439166	0.000293983	0.691112	0.00178091	7.59469e-05	0.000419362	0.800413	0.0560746	4.28414e-05	0.0331432	0.0944953	0.000301816	0.999832	0.398881
chr2L	332	17167096	17240373	0.999933	0.303408	0.999126	0.00615618	0.000310808	0.699424	0.0015136	0.000219555	0.000372579	0.816889	0.0417944	0.000126348	0.0292998	0.103117	0.000403339	0.999862	0.336668
chr2L	333	17240374	17311188	0.999921	0.29389	0.999658	0.0103039	0.00112499	0.741165	0.00164569	0.000865624	0.000570665	0.826602	0.0273271	0.000269952	0.0223846	0.107509	0.000355584	0.999805	0.275115
chr2L	334	17311189	17378822	0.99987	0.299705	0.999829	0.0149741	0.00673153	0.783503	0.00316462	0.000522754	0.000482533	0.831618	0.0145466	0.000295306	0.0175001	0.108606	0.000170456	0.999808	0.0693281
chr2L	335	17378823	17442711	0.999859	0.319352	0.999852	0.017479	0.0261514	0.794383	0.0142919	0.0008517	0.000890669	0.838624	0.00515198	0.00110365	0.0135633	0.106642	6.33353e-05	0.999795	0.0267722
chr2L	336	17442712	17522097	0.999918	0.322422	0.999835	0.0172785	0.0312459	0.794179	0.0174713	0.000178129	0.00027529	0.836363	0.00385834	0.000796375	0.0129147	0.101198	0.000117398	0.999853	0.0163898
chr2L	337	17522098	17588256	0.999931	0.337087	0.999676	0.0123712	0.0311727	0.780862	0.0185342	8.96828e-05	8.55207e-05	0.820062	0.00412043	0.000160027	0.0181665	0.106778	0.000210362	0.999828	0.015748
chr2L	338	17588257	17671252	0.999932	0.337411	0.999075	0.00998234	0.0344914	0.743561	0.0156802	9.19858e-05	4.95373e-05	0.793663	0.0046571	8.93657e-05	0.0232217	0.108851	0.000447527	0.999881	0.0100426
chr2L	339	17671253	17755005	0.999931	0.370961	0.997834	0.00739348	0.032829	0.732324	0.00366005	7.28287e-05	0.000117357	0.751555	0.00526908	0.000176966	0.0258587	0.107855	0.000553266	0.9999	0.00420811
chr2L	340	17755006	17817191	0.999916	0.455656	0.997673	0.0049529	0.0379982	0.73267	0.00202683	4.65848e-05	0.000363432	0.715501	0.00614708	0.000845297	0.0299247	0.103579	0.000573078	0.999868	0.00228002
chr2L	341	17817192	17888754	0.999878	0.478924	0.996852	0.00295502	0.0710782	0.719124	0.0014731	0.000122807	0.000248007	0.679534	0.00607402	0.00553826	0.0337989	0.0951144	0.000674495	0.999792	0.00112861
chr2L	342	17888755	17962566	0.999901	0.482789	0.998901	0.00214518	0.0806564	0.670274	0.00177355	6.51799e-05	0.000291427	0.622273	0.00609182	0.00637089	0.0354	0.0806616	0.000663665	0.999785	0.00104464
chr2L	343	17962567	18051746	0.999927	0.473216	0.999495	0.000418362	0.0836342	0.665246	0.00200329	0.000172557	0.000134942	0.531543	0.0051551	0.00781446	0.0350683	0.0571481	0.000185424	0.999856	0.00046247
chr2L	344	18051747	18152070	0.999931	0.435851	0.999678	0.000181758	0.079274	0.641169	0.000682062	7.90056e-05	0.000188977	0.503526	0.00430058	0.00667701	0.0435739	0.0521126	0.000158202	0.999874	0.000633633
chr2L	345	18152071	18228074	0.999934	0.324046	0.999601	9.0144e-05	0.0601146	0.568811	0.000602159	8.39946e-05	0.000520254	0.427211	0.0040346	0.00234383	0.0448094	0.0436704	0.000274238	0.999871	0.000606935
chr2L	346	18228075	18301501	0.999922	0.279401	0.999167	0.000177402	0.0580084	0.555442	0.00040783	0.000347593	0.0012849	0.36315	0.00378454	0.00196685	0.0466329	0.0371671	0.000239369	0.99982	0.00175201
chr2L	347	18301502	18375704	0.999929	0.247348	0.999714	0.000128195	0.0565648	0.504179	8.38759e-05	0.000915663	0.00101944	0.299033	0.00353125	0.00204693	0.0462815	0.0305606	5.73859e-05	0.999847	0.00156036
chr2L	348	18375705	18448775	0.999932	0.198879	0.999867	0.000374944	0.0677615	0.491001	5.06395e-05	0.00115589	0.000214859	0.245074	0.00559265	0.00464706	0.0464546	0.0248722	4.09419e-05	0.999824	0.00268415
chr2L	349	18448776	18508944	0.999917	0.163504	0.999908	0.000492762	0.0866228	0.497536	5.21986e-05	0.00107529	0.000132842	0.19101	0.0078435	0.00906694	0.0470162	0.0206541	0.000115583	0.999857	0.00683636
chr2L	350	18508945	18569281	0.999911	0.0401741	0.999915	0.000808556	0.0905711	0.491346	0.000166779	0.000671496	0.000291421	0.185093	0.00741559	0.00955493	0.0408341	0.022029	0.000419118	0.999886	0.00754142
chr2L	351	18569282	18624387	0.999912	0.0190268	0.999922	0.00178029	0.119568	0.46364	0.000456303	0.000934914	0.00126319	0.189687	0.0105791	0.00775494	0.0365159	0.0272164	0.000992797	0.999903	0.0108485
chr2L	352	18624388	18693698	0.999913	0.00901451	0.999925	0.00137011	0.126544	0.376982	0.000115887	0.000266961	0.00121452	0.184478	0.0106553	0.00181096	0.0387538	0.0656492	0.00214977	0.999926	0.0109923
chr2L	353	18693699	18778101	0.999905	0.00807145	0.999896	0.00155841	0.139959	0.365386	0.000121344	0.000275009	0.00289742	0.186743	0.00967559	0.000333332	0.0414221	0.111366	0.00365164	0.999923	0.0181896
chr2L	354	18778102	18847562	0.999908	0.00283541	0.999893	0.001626	0.140938	0.320515	0.00022428	0.000137752	0.00789954	0.18888	0.0122917	0.000138026	0.0439033	0.139985	0.00495092	0.999929	0.019803
chr2L	355	18847563	18909556	0.999896	0.00136866	0.999882	0.00211318	0.144062	0.317368	0.000488394	0.000246476	0.0164506	0.200505	0.017588	0.00016664	0.0505401	0.320242	0.00759722	0.999913	0.0223083
chr2L	356	18909557	18996566	0.999846	0.000629498	0.999846	0.00297391	0.153843	0.321003	0.000985127	0.000206074	0.0181618	0.206564	0.0241297	0.000144107	0.0539532	0.434244	0.00885125	0.999904	0.0209649
chr2L	357	18996567	19095196	0.999896	0.000883538	0.99989	0.00650901	0.177463	0.36308	0.00172086	0.00023906	0.022723	0.214343	0.0634877	0.000528536	0.0579747	0.560561	0.0089796	0.999903	0.0256741
chr2L	358	19095197	19183946	0.9999	0.000447516	0.999914	0.00696785	0.182927	0.374513	0.00117903	0.000660907	0.0233403	0.211384	0.0780761	0.00024889	0.0557134	0.602247	0.00927651	0.999896	0.0254498
chr2L	359	19183947	19249713	0.999908	0.000212918	0.999924	0.00485045	0.225804	0.393253	0.00102015	0.000567189	0.0193359	0.229822	0.12504	0.000379148	0.0533293	0.628138	0.00847378	0.999846	0.0195491
chr2L	360	19249714	19319465	0.999909	0.000425009	0.999922	0.00290979	0.252481	0.403934	0.000748956	0.000473041	0.0173546	0.240526	0.179448	0.000382231	0.0507628	0.643741	0.00640076	0.999864	0.00850606
chr2L	361	19319466	19387719	0.999889	0.0013797	0.999906	0.0029407	0.289252	0.447173	0.000802591	0.000768898	0.00807812	0.254475	0.546396	0.00119934	0.0485889	0.65961	0.00495995	0.999895	0.00407927
chr2L	362	19387720	19464799	0.999854	0.00526349	0.999854	0.00415396	0.548493	0.684042	0.00206589	0.00123128	0.00699608	0.301799	0.684405	0.00229893	0.0473961	0.678597	0.00361312	0.999918	0.00355107
chr2L	363	19464800	19564751	0.99991	0.0066571	0.999913	0.00377624	0.624161	0.767943	0.00180775	0.000526461	0.00144415	0.314207	0.771732	0.0056522	0.0417313	0.703499	0.00382276	0.999934	0.00190539
chr2L	364	19564752	19639408	0.999919	0.00573639	0.999927	0.000746454	0.646089	0.79963	0.000426009	0.000235155	0.000432777	0.317102	0.797061	0.00602011	0.0199949	0.708028	0.0041491	0.999932	0.00148473
chr2L	365	19639409	19745170	0.999926	0.00607206	0.999914	0.000355715	0.713524	0.894641	0.000149792	0.000368276	0.000326227	0.322008	0.805547	0.00842756	0.0173833	0.714853	0.0044973	0.999919	0.000693572
chr2L	366	19745171	19822213	0.999923	0.00490982	0.999923	0.000281454	0.731889	0.922022	0.000242771	0.000783824	0.000511181	0.340329	0.805189	0.00791399	0.0195965	0.724263	0.00495847	0.99991	0.000158964
chr2L	367	19822214	19886135	0.999903	0.00356742	0.999918	0.000456668	0.734226	0.929056	0.000231156	0.000890054	0.00101211	0.342688	0.793276	0.00408113	0.0185326	0.722111	0.00350972	0.999869	5.62887e-05
chr2L	368	19886136	19927626	0.999888	0.00433978	0.999904	0.000427986	0.765148	0.967449	5.86377e-05	0.00158165	0.000489085	0.360657	0.783504	0.00302138	0.0201847	0.722329	0.00235983	0.999899	4.70819e-05
chr2L	369	19927627	19980408	0.99986	0.0114742	0.999862	0.000267016	0.917535	0.979427	5.45216e-05	0.00391255	0.000362144	0.399159	0.791334	0.00253998	0.0366331	0.724038	0.0012424	0.999875	0.000147014
chr2L	370	19980409	20043197	0.999905	0.0128713	0.999887	0.0006486	0.96842	0.98279	0.000108411	0.00905107	0.000161885	0.410328	0.797458	0.00429966	0.0411326	0.742047	0.000932718	0.999878	0.000120484
chr2L	371	20043198	20112151	0.999917	0.0117556	0.999921	0.00109887	0.984421	0.983825	0.000567697	0.00981962	8.07251e-05	0.409165	0.793299	0.00399615	0.0402501	0.744283	0.00112185	0.999893	7.34542e-05
chr2L	372	20112152	20267402	0.999917	0.00556146	0.999925	0.000438882	0.989572	0.982064	0.000206458	0.00756029	4.9043e-05	0.392767	0.78517	0.00105879	0.032074	0.738571	0.0035607	0.999853	0.000151894
chr2L	373	20267403	20365881	0.999925	0.00355674	0.999903	0.00060131	0.990587	0.986646	0.000222931	0.00180089	0.000135405	0.365528	0.772833	0.000435335	0.0281602	0.727379	0.00579692	0.999696	5.48577e-05
chr2L	374	20365882	20471740	0.999916	0.00137741	0.999884	0.000855897	0.990644	0.992524	8.88489e-05	0.000536068	0.000780254	0.321658	0.739868	0.00020848	0.0248287	0.719958	0.00681524	0.999306	2.71525e-05
chr2L	375	20471741	20548258	0.999924	0.000293724	0.99982	0.000310125	0.99057	0.993915	9.33824e-05	0.000245015	0.00333603	0.277715	0.710697	0.000294403	0.0227106	0.706317	0.00785616	0.998503	2.93268e-05
chr2L	376	20548259	20668394	0.999923	0.000178002	0.999592	0.000131606	0.993263	0.99516	4.40915e-05	0.00015514	0.00572081	0.207789	0.681611	0.000816566	0.0183963	0.683558	0.0100894	0.995704	4.62552e-05
chr2L	377	20668395	20797382	0.999906	0.000122342	0.998989	8.66176e-05	0.993493	0.994899	2.84273e-05	0.000449772	0.00695937	0.158018	0.6526	0.000373905	0.0176318	0.646842	0.0109606	0.987828	0.000191294
chr2L	378	20797383	20884900	0.999924	0.000379751	0.997786	8.83829e-05	0.994466	0.996276	4.72975e-05	0.000540505	0.00999158	0.108107	0.640943	0.000323488	0.0152575	0.588362	0.0116322	0.987853	0.000175054
chr2L	379	20884901	21006909	0.999914	0.00227327	0.997656	0.000267729	0.995965	0.996153	0.000191715	0.000347257	0.0210736	0.0780028	0.595025	0.000186556	0.0127247	0.495688	0.0170122	0.99105	0.00050588
chr2L	380	21006910	21189972	0.999889	0.00636086	0.996584	0.00127152	0.998123	0.994205	0.00108333	0.000573579	0.0749118	0.0484074	0.488699	8.82721e-05	0.00807259	0.349117	0.022262	0.993847	0.00108829
chr2L	381	21189973	21372205	0.999908	0.0083357	0.998431	0.00103433	0.999117	0.98794	0.00507168	0.00238398	0.335102	0.0232456	0.116834	0.000195773	0.00416787	0.204135	0.028652	0.995593	0.000650317
chr2L	382	21372206	21727978	0.999905	0.00762892	0.998909	0.000264205	0.999333	0.967041	0.00746842	0.00234963	0.410354	0.00494821	0.0248755	0.000189173	0.000728564	0.0844282	0.0721943	0.995848	0.000130617
chr2L	383	21727979	21855005	0.999864	0.00290547	0.998701	0.000240385	0.999064	0.946576	0.00708571	0.00149942	0.486456	0.00183582	0.0058474	0.000563955	0.000240527	0.0412764	0.0965714	0.99462	5.46103e-05
chr2L	384	21855006	21976853	0.999725	0.00160853	0.997421	0.000197132	0.997976	0.873372	0.00482294	0.00100759	0.510987	0.00166144	0.00193005	0.000450061	0.000141473	0.0186876	0.239745	0.990646	5.35674e-05
chr2L	385	21976854	22085428	0.999316	0.00177864	0.997816	0.00025173	0.99882	0.853338	0.00451377	0.00152951	0.564436	0.00143099	0.00101792	0.00091373	0.000102201	0.00495638	0.410007	0.989289	0.00018978
chr2L	386	22085429	22189081	0.997959	0.00266453	0.997175	0.000372855	0.998896	0.781751	0.00558482	0.00597062	0.59987	0.00186997	0.0013853	0.00440643	0.000218452	0.00249407	0.466473	0.983719	0.000771422
chr2L	387	22189082	22323239	0.994447	0.00336263	0.994478	0.00166894	0.998498	0.528526	0.00874813	0.0069598	0.648753	0.00241884	0.00181489	0.004853	0.000448115	0.00241964	0.48207	0.965662	0.00488632
chr2L	388	22323240	22590500	0.986818	0.00291502	0.984767	0.0038533	0.99724	0.488476	0.02014	0.00675856	0.662046	0.00326502	0.0022001	0.00824692	0.00231936	0.00231826	0.510725	0.964003	0.00959274
chr2L	389	22590501	23011543	0.984245	0.00485985	0.981322	0.0086801	0.994456	0.470535	0.0229021	0.00851654	0.669739	0.00926272	0.00532303	0.0127958	0.00366923	0.00414559	0.525951	0.961818	0.0150037

## Sheet: 2R
chr	window	start	stop	CK2	CO13N	CO9N	RC5	RG13N	RG37N	RG39	RG6N	RG8	SP173	SP188	SP221	SP235	SP241	SP80	ED55.2	ED56.2
chr2R	0	0	452572	0.99593	0.034425	0.995059	0.016315	0.962689	0.456853	0.0188713	0.028566	0.484412	0.00345952	0.253169	0.00331588	0.115461	0.0721098	0.992735	0.991919	0.0251382
chr2R	1	452573	689649	0.998517	0.0314355	0.998134	0.0108036	0.963374	0.455594	0.0134113	0.00620222	0.474668	0.000616667	0.26166	0.00281798	0.107231	0.0740118	0.995019	0.997139	0.0165031
chr2R	2	689650	839697	0.999313	0.0295783	0.998783	0.00581123	0.95824	0.4491	0.0116617	0.00318408	0.439349	0.0002893	0.287505	0.000769887	0.0837178	0.0928343	0.99489	0.99853	0.0107806
chr2R	3	839698	947066	0.999763	0.0203414	0.998542	0.0012548	0.965114	0.425777	0.00354954	0.00410957	0.288521	0.000152252	0.291973	0.000223648	0.0591129	0.125895	0.992592	0.999052	0.00108102
chr2R	4	947067	1084873	0.999882	0.00221877	0.997064	0.000749405	0.967409	0.420672	0.00323544	0.0141928	0.177831	0.000194478	0.363175	6.70447e-05	0.0236453	0.145871	0.986443	0.998821	0.00025711
chr2R	5	1084874	1242957	0.999865	0.000683918	0.990875	0.000820316	0.968486	0.449622	0.00336472	0.0170086	0.0965602	0.000220669	0.487432	3.65478e-05	0.0204557	0.168699	0.967626	0.997753	0.000240993
chr2R	6	1242958	1366399	0.9999	0.000917639	0.989879	0.000994439	0.992384	0.794101	0.00537073	0.0289989	0.0914665	0.00159052	0.656851	2.85701e-05	0.0182811	0.18415	0.899469	0.999112	0.00150184
chr2R	7	1366400	1492821	0.999908	0.000418224	0.985749	0.00103978	0.99786	0.93342	0.00475943	0.0307591	0.0884054	0.00180698	0.730889	7.81411e-05	0.00596164	0.185198	0.789293	0.999478	0.0016874
chr2R	8	1492822	1627735	0.999861	4.55794e-05	0.968779	0.00115395	0.999198	0.975625	0.000476336	0.0265034	0.0761991	0.000608548	0.922219	0.000177094	0.00114144	0.20098	0.404092	0.999805	0.000258477
chr2R	9	1627736	1772602	0.99991	2.35979e-05	0.936573	0.00435723	0.999514	0.985667	0.000139109	0.0060404	0.0235009	0.000852422	0.969493	0.000286088	0.000107828	0.201101	0.182856	0.999898	3.76249e-05
chr2R	10	1772603	1928940	0.999941	7.00816e-05	0.806064	0.0077493	0.999402	0.98789	0.000346239	0.000589693	0.00585815	0.00549448	0.987416	0.00141845	1.79363e-05	0.207591	0.0505299	0.999937	3.89038e-05
chr2R	11	1928941	2058030	0.999941	0.00039347	0.793979	0.0439338	0.998615	0.994933	0.0030976	6.08386e-05	0.00459995	0.0243113	0.995284	0.00780173	1.59557e-05	0.250978	0.00623476	0.999933	0.000274606
chr2R	12	2058031	2374395	0.999942	0.000361161	0.76428	0.0690661	0.99517	0.99653	0.0269618	2.11961e-05	0.000421315	0.0498002	0.997697	0.0108394	6.29304e-05	0.263173	0.00198168	0.999917	0.000686248
chr2R	13	2374396	2474102	0.999917	0.000916024	0.715771	0.28847	0.983763	0.997268	0.0359488	6.58734e-05	8.05063e-05	0.0575822	0.998735	0.0445078	0.000612903	0.297568	0.00127305	0.99992	0.000978592
chr2R	14	2474103	2624647	0.999926	0.0067371	0.538998	0.744742	0.983454	0.998455	0.0496112	0.000135464	2.81359e-05	0.0619643	0.99911	0.26893	0.00119535	0.343331	0.000751053	0.999936	0.00304409
chr2R	15	2624648	2744913	0.999916	0.0669221	0.526927	0.923741	0.995033	0.999378	0.101896	7.40585e-05	1.21482e-05	0.117472	0.998775	0.407496	0.00952972	0.651196	0.000646738	0.999945	0.00319493
chr2R	16	2744914	2872213	0.999933	0.527403	0.485439	0.979558	0.998651	0.999778	0.115643	1.71458e-05	1.13362e-05	0.193035	0.997335	0.450799	0.0911212	0.732505	0.000519245	0.999929	0.0053795
chr2R	17	2872214	2988154	0.999938	0.812012	0.487059	0.992339	0.999456	0.999859	0.121765	1.95274e-05	3.0588e-05	0.324646	0.998988	0.45934	0.109844	0.76518	0.000812084	0.999908	0.004785
chr2R	18	2988155	3117580	0.999946	0.936724	0.510074	0.995405	0.999636	0.999826	0.136583	3.28431e-05	5.36733e-05	0.355337	0.999627	0.454601	0.115957	0.775885	0.00152803	0.999923	0.00277043
chr2R	19	3117581	3233330	0.999924	0.966402	0.797996	0.996133	0.999481	0.999657	0.31529	0.000134088	1.80148e-05	0.730926	0.999718	0.421532	0.204762	0.772661	0.00166201	0.999886	0.0028926
chr2R	20	3233331	3315400	0.999905	0.975769	0.885168	0.995409	0.998952	0.998949	0.370672	6.24963e-05	4.48248e-05	0.819894	0.999828	0.321926	0.22657	0.755766	0.000179627	0.99985	0.00315392
chr2R	21	3315401	3453577	0.999922	0.984964	0.91808	0.996885	0.998792	0.999651	0.446335	2.35847e-05	0.000408998	0.954603	0.999892	0.312313	0.269341	0.755694	9.13502e-05	0.999913	0.00200279
chr2R	22	3453578	3568267	0.999905	0.987699	0.935219	0.996694	0.997773	0.999802	0.465195	1.88894e-05	0.00179927	0.987432	0.999934	0.277915	0.278093	0.743365	0.000485333	0.999914	0.0013516
chr2R	23	3568268	3667928	0.999767	0.988762	0.980419	0.996115	0.993882	0.999709	0.473379	1.33729e-05	0.0163308	0.996511	0.999928	0.258766	0.274013	0.70784	0.0035209	0.99988	0.00311515
chr2R	24	3667929	3784015	0.9995	0.997236	0.991094	0.992581	0.988465	0.999436	0.490444	1.82503e-05	0.0204067	0.998651	0.999878	0.246172	0.271018	0.690199	0.0298799	0.999896	0.00365159
chr2R	25	3784016	3909277	0.998786	0.999242	0.99443	0.977293	0.972381	0.998402	0.494156	7.46261e-05	0.0205199	0.999042	0.999832	0.210973	0.246446	0.619691	0.0394944	0.999923	0.00669612
chr2R	26	3909278	4038280	0.999574	0.999719	0.994705	0.912789	0.933939	0.99598	0.488008	0.000821043	0.0160042	0.998897	0.999852	0.102817	0.160806	0.340384	0.0411156	0.99993	0.043115
chr2R	27	4038281	4127423	0.999838	0.999888	0.993205	0.651876	0.835923	0.98558	0.465392	0.000526786	0.0047756	0.997951	0.999851	0.0406597	0.0384081	0.135379	0.0361661	0.999918	0.305796
chr2R	28	4127424	4199736	0.999869	0.999918	0.997596	0.630283	0.586045	0.941238	0.45364	0.00010648	0.0015887	0.997663	0.999893	0.0165208	0.0260937	0.112164	0.0129602	0.999877	0.443906
chr2R	29	4199737	4298109	0.999828	0.999871	0.999281	0.613563	0.55811	0.895385	0.423365	7.37194e-05	0.000784762	0.997853	0.999873	0.0145336	0.0259205	0.105429	0.00734139	0.999892	0.487821
chr2R	30	4298110	4406164	0.999874	0.999747	0.999663	0.585234	0.549183	0.88847	0.421544	0.000179211	0.0002571	0.998361	0.999855	0.0128373	0.0384265	0.10399	0.00220728	0.999894	0.499339
chr2R	31	4406165	4482054	0.999806	0.999601	0.999734	0.488841	0.523048	0.873203	0.400995	0.000238973	4.8556e-05	0.99813	0.999828	0.00323981	0.0406928	0.0926229	0.00203454	0.999833	0.524082
chr2R	32	4482055	4571223	0.999888	0.998992	0.999714	0.139443	0.455155	0.836641	0.335612	0.00169991	7.20893e-05	0.997132	0.999893	0.00203298	0.0392888	0.0554781	0.00186716	0.999866	0.528573
chr2R	33	4571224	4674486	0.999907	0.998555	0.999436	0.11162	0.451795	0.834325	0.334813	0.00187861	0.00025645	0.99697	0.999887	0.00113414	0.0545241	0.0273281	0.00160063	0.999897	0.517263
chr2R	34	4674487	4778498	0.999911	0.99635	0.998368	0.110204	0.428409	0.815923	0.313646	0.000720973	0.00255076	0.995468	0.999897	0.001425	0.059412	0.00656015	0.00124098	0.999941	0.493146
chr2R	35	4778499	4925785	0.999876	0.990535	0.994478	0.123506	0.438592	0.823597	0.31687	0.000793984	0.00263455	0.994575	0.999849	0.00186192	0.0917142	0.00144754	0.000786741	0.999947	0.458018
chr2R	36	4925786	5028417	0.999849	0.971202	0.978261	0.125044	0.433569	0.823273	0.304189	0.000375067	0.00366718	0.992049	0.999769	0.00594084	0.0996586	0.00127197	0.000739178	0.99993	0.407396
chr2R	37	5028418	5126626	0.999923	0.889639	0.966611	0.116757	0.401556	0.808147	0.268456	5.0014e-05	0.00265236	0.981049	0.999753	0.00708573	0.0988458	0.00235556	0.00133306	0.999923	0.200754
chr2R	38	5126627	5219690	0.999921	0.559732	0.918235	0.0875851	0.274869	0.771882	0.113767	1.69839e-05	0.000540717	0.948335	0.999781	0.00538187	0.0853086	0.00205197	0.0010835	0.999888	0.179833
chr2R	39	5219691	5310246	0.999936	0.533071	0.916375	0.0683691	0.163278	0.748384	0.0248579	1.24753e-05	8.34106e-05	0.898583	0.999727	0.00353511	0.0752479	0.00189452	0.000784665	0.999785	0.124782
chr2R	40	5310247	5389310	0.999901	0.535897	0.930687	0.061662	0.126184	0.693467	0.00910513	2.5225e-05	0.000103228	0.865943	0.99941	0.00180777	0.0663945	0.00163837	0.000429077	0.999409	0.115122
chr2R	41	5389311	5496490	0.999892	0.558191	0.936267	0.0585773	0.0728886	0.480359	0.0083671	0.000136174	3.53041e-05	0.838717	0.998264	0.000198861	0.0584951	0.00127997	4.45807e-05	0.998713	0.0910282
chr2R	42	5496491	5589153	0.999852	0.564633	0.933845	0.0507167	0.0631887	0.451648	0.00217077	0.000117668	0.000137404	0.816089	0.998908	3.60645e-05	0.0515366	0.00104175	1.63833e-05	0.995647	0.0823045
chr2R	43	5589154	5665827	0.999892	0.556201	0.918415	0.0199192	0.0578716	0.436135	0.00192546	6.12712e-05	0.00045059	0.715123	0.999378	1.68018e-05	0.045652	0.00238102	2.22093e-05	0.991036	0.0643845
chr2R	44	5665828	5734104	0.999945	0.516198	0.868617	0.0142065	0.0385119	0.382123	0.000227468	1.98288e-05	5.83414e-05	0.306256	0.999772	5.04873e-05	0.0184434	0.00236099	4.52761e-05	0.98045	0.022582
chr2R	45	5734105	5853086	0.999956	0.502033	0.867305	0.00274293	0.00675539	0.150125	2.75856e-05	1.19945e-05	1.59452e-05	0.0713797	0.999878	2.09586e-05	0.00273733	0.000279205	2.06823e-05	0.93679	0.0197672
chr2R	46	5853087	5948121	0.999954	0.519368	0.870009	0.00120808	0.000640386	0.0168066	1.27325e-05	2.187e-05	3.53702e-05	0.0526994	0.999924	8.85539e-05	0.00037766	0.000169586	1.42269e-05	0.931815	0.0259136
chr2R	47	5948122	6035491	0.999943	0.735578	0.906262	0.00138902	0.000166353	0.0028798	2.72045e-05	0.00013959	0.000316031	0.0481314	0.9999	5.96536e-05	0.000125081	0.000308305	4.05305e-05	0.940633	0.0519355
chr2R	48	6035492	6101245	0.999925	0.878499	0.914152	0.000399065	2.9952e-05	0.000980574	1.86769e-05	4.4365e-05	0.000213352	0.0538123	0.999902	0.000317245	6.16264e-05	0.000305183	8.90448e-05	0.945631	0.06989
chr2R	49	6101246	6148095	0.999943	0.928221	0.913923	0.000400938	6.34023e-05	0.000983919	1.6188e-05	6.18467e-05	8.38415e-05	0.060186	0.999931	0.000424541	0.000311137	0.000210298	0.000249806	0.948653	0.248156
chr2R	50	6148096	6202042	0.999943	0.940468	0.917146	0.000994811	5.4344e-05	0.00126839	7.75165e-05	3.45209e-05	2.06385e-05	0.072003	0.999939	0.000373867	0.000528956	0.000586961	0.000244676	0.945926	0.294538
chr2R	51	6202043	6261450	0.999942	0.943353	0.975632	0.000420801	0.000323825	0.00466701	0.000322932	2.34225e-05	4.0828e-05	0.0854614	0.999909	0.000843706	0.000596417	0.00478856	0.000200309	0.955596	0.318269
chr2R	52	6261451	6323015	0.999909	0.942064	0.989004	0.000375797	0.00349551	0.00832342	0.00328576	0.000142649	0.000294177	0.100619	0.999773	0.00134886	0.000242432	0.0101788	0.000195077	0.95669	0.410719
chr2R	53	6323016	6391848	0.999766	0.932223	0.993329	0.00141806	0.00386915	0.0550673	0.0036006	0.000499319	0.000829567	0.103309	0.999251	0.00220633	0.000191191	0.0116623	0.000766444	0.976282	0.550561
chr2R	54	6391849	6462220	0.99913	0.904491	0.994468	0.00100945	0.00183484	0.0692122	0.00182661	0.00019667	0.000562776	0.0981492	0.998579	0.00234384	0.000874168	0.0145156	0.000499704	0.990101	0.794234
chr2R	55	6462221	6536784	0.996434	0.796755	0.994737	0.000570107	0.00139736	0.0884589	0.00134813	0.000211581	0.000575364	0.0928254	0.995413	0.00258191	0.00154688	0.0183189	0.000675458	0.994542	0.853448
chr2R	56	6536785	6592751	0.984949	0.542785	0.993424	0.000824441	0.00176935	0.112559	0.000786529	0.000114615	0.000446261	0.0833887	0.987851	0.00261695	0.00164329	0.0202681	0.000627665	0.997544	0.86682
chr2R	57	6592752	6646166	0.963239	0.523543	0.988743	0.00110231	0.00205391	0.154846	0.000122581	0.000109271	0.000604392	0.0681357	0.958969	0.00257455	0.00165928	0.0200842	0.00135018	0.99881	0.867557
chr2R	58	6646167	6711158	0.897402	0.443061	0.974759	0.000483859	0.00112991	0.181801	2.74823e-05	2.11257e-05	0.000118245	0.0465996	0.915073	0.000308983	0.000328007	0.0185911	0.00111829	0.999657	0.855264
chr2R	59	6711159	6753693	0.772378	0.150984	0.975935	0.000411666	0.0021118	0.18912	7.37249e-05	2.58413e-05	0.000142488	0.00513651	0.756158	0.00015434	0.000160529	0.0085586	0.000267004	0.999854	0.855454
chr2R	60	6753694	6811893	0.760726	0.127022	0.977182	0.00160475	0.00917181	0.190486	0.000506435	5.30115e-05	0.000356708	0.000909351	0.743836	0.000550997	0.000619497	0.0080158	8.96767e-05	0.999914	0.849331
chr2R	61	6811894	6869625	0.726988	0.0304048	0.974522	0.00217171	0.0115203	0.178942	0.000109145	2.35054e-05	4.07913e-05	0.000606482	0.73104	9.06257e-05	0.000234221	0.00275176	8.24009e-05	0.999913	0.853711
chr2R	62	6869626	6942015	0.72654	0.0171177	0.971901	0.003162	0.0102158	0.175168	0.000157287	1.80338e-05	1.43699e-05	0.00192889	0.72923	3.53268e-05	0.000460452	0.00218152	2.83625e-05	0.99984	0.916534
chr2R	63	6942016	7000765	0.719911	0.00505662	0.970358	0.00414955	0.00385483	0.172233	2.96539e-05	1.489e-05	2.69059e-05	0.00402334	0.771523	0.000151759	0.000541349	0.00155038	6.84602e-05	0.999862	0.931477
chr2R	64	7000766	7046695	0.697381	0.00368228	0.961428	0.00511351	0.003523	0.171948	5.12307e-05	5.15347e-05	1.54057e-05	0.00632383	0.819226	9.1753e-05	0.000524508	0.000830595	1.53763e-05	0.999922	0.934309
chr2R	65	7046696	7089764	0.638118	0.00349004	0.924329	0.00666274	0.00820564	0.156678	0.000480514	8.22437e-05	6.22166e-05	0.00610125	0.839644	0.000533339	0.000700826	0.00108793	1.8242e-05	0.999933	0.930401
chr2R	66	7089765	7143638	0.525081	0.00429478	0.923398	0.0243305	0.0162981	0.157149	0.00562058	4.60752e-05	0.000673117	0.0138768	0.843935	0.00625428	0.000736524	0.00122207	9.96786e-05	0.999933	0.915426
chr2R	67	7143639	7207155	0.0783157	0.0042321	0.912749	0.0291216	0.0252213	0.165718	0.00897345	0.00026804	0.00133432	0.0158316	0.859787	0.00841232	0.000322976	0.00314083	8.31995e-05	0.999896	0.857486
chr2R	68	7207156	7281419	0.0397883	0.00193217	0.87223	0.0279983	0.0262126	0.164424	0.0109671	0.000962176	0.0014922	0.0143711	0.86066	0.00949924	0.000860945	0.00336453	0.000234396	0.999883	0.686848
chr2R	69	7281420	7322632	0.0298037	0.000543457	0.711715	0.0184051	0.0223683	0.147797	0.00990615	0.000543561	0.000131249	0.0073877	0.848877	0.00735807	0.000470799	0.00212041	3.08977e-05	0.999808	0.673614
chr2R	70	7322633	7385189	0.00617936	0.000336996	0.0921372	0.00244273	0.00345782	0.0775711	0.00422136	0.000116581	2.33471e-05	0.00167671	0.795809	0.000685289	6.01244e-05	0.000879267	1.71779e-05	0.999871	0.683384
chr2R	71	7385190	7435520	0.00432157	0.000807235	0.0435303	0.000808136	0.00101042	0.0728389	0.00455561	2.11816e-05	4.13114e-05	0.0013115	0.674333	0.000163979	4.80958e-05	0.000886412	6.64934e-05	0.999903	0.743919
chr2R	72	7435521	7483482	0.00486182	0.000684031	0.00774813	0.000455656	0.00067281	0.075973	0.00298302	3.5152e-05	2.94237e-05	0.0010706	0.158663	4.72231e-05	0.000145821	0.00100398	3.52445e-05	0.999918	0.758146
chr2R	73	7483483	7546541	0.00469447	0.000656398	0.00282637	0.000312744	0.000383642	0.0891262	0.000374997	1.59826e-05	1.61423e-05	0.00100708	0.114142	9.26056e-05	0.000170005	0.00112274	0.000114833	0.99993	0.778415
chr2R	74	7546542	7599002	0.00427224	0.000815034	0.000399843	0.000842467	0.000573329	0.104041	0.000122589	1.99215e-05	1.08316e-05	0.000823018	0.0887493	4.34077e-05	3.06017e-05	0.00112829	0.00018271	0.9999	0.781316
chr2R	75	7599003	7653533	0.000781822	0.000563633	6.06318e-05	0.00031546	0.000240388	0.10623	3.99294e-05	1.76062e-05	1.67194e-05	0.000182947	0.0106221	3.81972e-05	1.97629e-05	0.000264003	3.62819e-05	0.99984	0.776598
chr2R	76	7653534	7706635	0.000337802	0.000400046	5.50798e-05	0.000296242	0.000583154	0.102958	0.000159018	8.55931e-05	5.30854e-05	0.00029641	0.00391687	0.00016929	6.73192e-05	0.000138261	5.44879e-05	0.999554	0.747548
chr2R	77	7706636	7792202	0.000733302	0.000967791	0.000418468	0.000636154	0.0054626	0.101561	0.000581413	0.00064713	0.000199832	0.00136654	0.00401421	0.00102742	0.000719866	0.000595996	0.000356446	0.99862	0.622025
chr2R	78	7792203	7848103	7.14554e-05	0.000592919	8.36495e-05	0.000175129	0.00619226	0.0863873	6.19373e-05	0.000222714	4.06967e-05	0.00102157	0.00133315	0.000706018	0.000347911	6.99211e-05	7.01197e-05	0.995231	0.147517
chr2R	79	7848104	7912001	1.75787e-05	0.00164496	0.00016767	9.07892e-05	0.00781388	0.0505421	2.68399e-05	0.000445164	1.75952e-05	0.000160102	0.000255119	0.000512702	5.03967e-05	4.17364e-05	0.000136868	0.990542	0.0216664
chr2R	80	7912002	7975521	2.5106e-05	0.0033749	0.000129212	3.46819e-05	0.0322514	0.0367853	3.09106e-05	9.88105e-05	5.95029e-05	0.000165109	0.000202528	0.000272354	5.71255e-05	0.00025046	0.000206927	0.990761	0.00422503
chr2R	81	7975522	8123871	0.00019375	0.0078782	0.000215546	0.000155586	0.0376974	0.0167544	2.38882e-05	1.81747e-05	5.43617e-05	0.000495805	0.00107358	0.000918684	0.000469163	0.00046419	0.000687929	0.989902	0.00231097
chr2R	82	8123872	8179998	3.90257e-05	0.0105159	9.78859e-05	0.00161428	0.106365	0.0146501	7.21962e-05	1.10675e-05	0.00012302	0.00042432	0.00137009	0.00105495	0.000472595	0.000674873	0.000716676	0.989477	0.000290833
chr2R	83	8179999	8252532	1.37651e-05	0.024102	0.000257892	0.00177473	0.702517	0.0152407	4.51754e-05	1.29663e-05	0.000498689	0.000197594	0.00155865	0.001345	0.000321175	0.000965362	0.000849162	0.989893	6.31487e-05
chr2R	84	8252533	8319397	1.75123e-05	0.0321678	0.000201659	0.000494998	0.867339	0.0118855	6.43878e-05	1.22765e-05	0.000366527	0.000193602	0.00115333	0.000696348	0.000326733	0.0002961	0.000487019	0.989185	5.71844e-05
chr2R	85	8319398	8381194	5.35527e-05	0.0333302	0.000806439	0.000417641	0.904967	0.0147024	1.73901e-05	1.30004e-05	0.000161216	7.61368e-05	0.000684153	0.000369392	0.000565777	0.000200624	0.000346691	0.996819	0.000318049
chr2R	86	8381195	8443876	0.000552824	0.0287546	0.00195808	0.000119445	0.914225	0.0198763	2.91814e-05	1.13994e-05	0.00020495	0.000309779	0.00010177	4.69881e-05	0.00103874	0.000397101	5.27411e-05	0.998675	0.000138472
chr2R	87	8443877	8511089	0.00050774	0.0147515	0.00191425	2.75767e-05	0.913777	0.0195122	2.44509e-05	2.20649e-05	3.36309e-05	0.0001072	2.19709e-05	4.63951e-05	0.000674901	0.000194165	3.76212e-05	0.999471	0.000114127
chr2R	88	8511090	8554977	0.0023611	0.00940185	0.0061027	1.9304e-05	0.903668	0.0329806	5.6796e-05	1.38689e-05	1.67973e-05	0.000109291	1.35931e-05	2.66715e-05	0.000421168	3.35048e-05	6.03228e-05	0.999565	0.000598269
chr2R	89	8554978	8604934	0.0255589	0.00540814	0.0598646	0.000101068	0.876427	0.0366543	0.000448213	2.00146e-05	5.92327e-05	2.78538e-05	3.22244e-05	4.42258e-05	0.000118031	3.32054e-05	0.000260585	0.999845	0.00628725
chr2R	90	8604935	8649581	0.135461	0.00403706	0.681842	0.000783645	0.832162	0.0701026	0.00112961	0.000131301	0.000498506	4.25671e-05	0.00017056	3.80469e-05	0.000172235	8.73021e-05	0.000453096	0.999915	0.0743632
chr2R	91	8649582	8712427	0.707445	0.0068511	0.887104	0.0073233	0.815758	0.326733	0.0044837	2.99167e-05	0.00611711	8.2437e-05	0.000761625	0.000135561	0.000481653	0.000307687	0.000232798	0.99989	0.740566
chr2R	92	8712428	8779088	0.901933	0.0420061	0.948976	0.0698872	0.825473	0.403838	0.00625906	8.44436e-05	0.0641402	0.000104098	0.00187875	0.000473118	0.00216593	0.00109938	0.000838363	0.999778	0.924612
chr2R	93	8779089	8832713	0.963431	0.386129	0.969732	0.0840388	0.839698	0.440457	0.00710194	3.91908e-05	0.237498	0.000489135	0.0078755	0.00208347	0.00804309	0.00104961	0.0013809	0.999739	0.971357
chr2R	94	8832714	8876250	0.982019	0.496628	0.982354	0.0861734	0.841355	0.462401	0.0168522	9.4075e-05	0.305211	0.00117235	0.0798797	0.00370597	0.016709	0.00315579	0.00229873	0.999779	0.98753
chr2R	95	8876251	8919199	0.993988	0.781547	0.99109	0.0807126	0.871991	0.466661	0.130374	0.000531554	0.319776	0.00065937	0.107787	0.0151507	0.0288	0.0279555	0.00324406	0.999891	0.992488
chr2R	96	8919200	8966263	0.997196	0.931541	0.993996	0.0831291	0.964838	0.560593	0.721151	0.00567973	0.319103	0.00141218	0.352103	0.0349868	0.0975154	0.167565	0.00948045	0.999918	0.994177
chr2R	97	8966264	9016206	0.99854	0.978982	0.99548	0.0806417	0.990515	0.585699	0.890794	0.00648493	0.300608	0.0108072	0.777433	0.273098	0.13973	0.222027	0.0104156	0.999928	0.996896
chr2R	98	9016207	9086316	0.99949	0.990184	0.995809	0.0826501	0.997621	0.887225	0.932726	0.00601585	0.226128	0.0826921	0.885157	0.768244	0.647192	0.696719	0.00872954	0.999917	0.997523
chr2R	99	9086317	9144878	0.999651	0.996114	0.994136	0.075517	0.99931	0.959681	0.943917	0.00622514	0.222335	0.101244	0.910434	0.905008	0.800174	0.808018	0.013589	0.999836	0.999192
chr2R	100	9144879	9188352	0.999722	0.997909	0.988103	0.0487032	0.999708	0.983275	0.944917	0.00423146	0.223212	0.150701	0.919408	0.94758	0.843693	0.837852	0.0284398	0.999785	0.999551
chr2R	101	9188353	9248701	0.99976	0.998028	0.980193	0.0464072	0.999866	0.992876	0.939807	0.00055325	0.22366	0.16244	0.920521	0.957615	0.861269	0.849072	0.0311186	0.999804	0.99944
chr2R	102	9248702	9291738	0.999866	0.996892	0.968174	0.044476	0.999911	0.995414	0.940778	0.000342285	0.225123	0.169086	0.912412	0.964013	0.885809	0.938055	0.0319487	0.999904	0.999268
chr2R	103	9291739	9350698	0.999901	0.992822	0.917662	0.0480171	0.999907	0.995938	0.978548	6.54724e-05	0.217536	0.240867	0.91831	0.966832	0.890429	0.965729	0.0391085	0.999936	0.998509
chr2R	104	9350699	9400363	0.999909	0.982427	0.734922	0.046059	0.999823	0.994983	0.988036	4.08868e-05	0.193192	0.258736	0.916708	0.964146	0.886518	0.972127	0.0396197	0.999944	0.99647
chr2R	105	9400364	9436828	0.999903	0.944699	0.710405	0.0550697	0.999466	0.990318	0.991629	0.000250617	0.157867	0.262281	0.902004	0.957966	0.867379	0.972058	0.0355421	0.999939	0.988655
chr2R	106	9436829	9474706	0.999893	0.823689	0.715739	0.0559569	0.998057	0.974583	0.991755	0.00280189	0.155572	0.253093	0.849793	0.933979	0.784218	0.965549	0.0158564	0.999932	0.957081
chr2R	107	9474707	9522458	0.999803	0.698201	0.71767	0.0486526	0.994529	0.91507	0.989221	0.00342155	0.15725	0.224731	0.750478	0.835033	0.736779	0.956142	0.0146626	0.99986	0.945234
chr2R	108	9522459	9583883	0.99981	0.63819	0.719343	0.0527699	0.991964	0.824479	0.977401	0.00467437	0.148145	0.205199	0.599099	0.746561	0.694963	0.948147	0.0146713	0.999891	0.899031
chr2R	109	9583884	9643313	0.999814	0.427378	0.710434	0.0576597	0.990091	0.748368	0.939399	0.00406544	0.113218	0.174577	0.464355	0.685627	0.630899	0.943126	0.00968649	0.999847	0.871747
chr2R	110	9643314	9692746	0.999816	0.410423	0.732808	0.0631397	0.994265	0.680341	0.930746	0.00857976	0.0952924	0.152385	0.335446	0.663249	0.588848	0.938287	0.00507251	0.999902	0.780384
chr2R	111	9692747	9739635	0.999886	0.406756	0.73639	0.0657624	0.994899	0.651155	0.907474	0.0172086	0.0921017	0.132978	0.20647	0.647577	0.424604	0.933626	0.0049593	0.999929	0.411388
chr2R	112	9739636	9785170	0.999902	0.382438	0.732199	0.0608839	0.993479	0.562597	0.825365	0.0209054	0.0744486	0.0715265	0.0223233	0.579154	0.121552	0.910023	0.00140483	0.999916	0.382438
chr2R	113	9785171	9837336	0.999824	0.291136	0.711978	0.0375723	0.992181	0.394022	0.515021	0.0196055	0.0646233	0.0666063	0.00637601	0.398038	0.0974733	0.837908	0.000707237	0.999847	0.38412
chr2R	114	9837337	9911597	0.999898	0.160678	0.658461	0.0368145	0.990046	0.266668	0.253704	0.012263	0.0541995	0.0579766	0.00547625	0.239469	0.0732302	0.774227	0.000721226	0.999876	0.369522
chr2R	115	9911598	9967710	0.999904	0.0858611	0.653237	0.0342574	0.988429	0.154485	0.154155	0.00737511	0.0431582	0.0440796	0.00456664	0.148567	0.0358235	0.677084	0.00110304	0.999833	0.318326
chr2R	116	9967711	10033891	0.999862	0.0789565	0.63385	0.0300262	0.985729	0.0470315	0.0664065	0.00370472	0.00633831	0.0224068	0.0034548	0.0814692	0.00986532	0.528946	0.000490677	0.999882	0.131625
chr2R	117	10033892	10123132	0.999909	0.0877741	0.572111	0.028709	0.985549	0.0349064	0.0578162	0.0043896	0.00124085	0.0181795	0.00551171	0.046513	0.00763344	0.43104	0.00112311	0.999798	0.116678
chr2R	118	10123133	10201631	0.999933	0.0892785	0.454322	0.0200743	0.982378	0.0357581	0.0243082	0.00399574	0.000261263	0.0221452	0.00824896	0.0451793	0.00978347	0.403989	0.000618269	0.999908	0.120604
chr2R	119	10201632	10262535	0.999912	0.0914191	0.430433	0.0208883	0.969139	0.036915	0.00419273	0.000644883	9.86481e-05	0.0265083	0.0112164	0.0443102	0.0117334	0.384542	0.000124618	0.99992	0.124093
chr2R	120	10262536	10318396	0.999849	0.0905493	0.36733	0.0173696	0.927749	0.0313584	0.00217724	0.000307149	0.000254919	0.0252268	0.0104964	0.033888	0.0103582	0.374698	9.98968e-05	0.99992	0.193186
chr2R	121	10318397	10372804	0.999825	0.0792391	0.246869	0.0178201	0.784891	0.00649275	0.000584637	0.000433422	0.00140275	0.0154695	0.00590306	0.0133904	0.00252791	0.340419	0.000342424	0.999925	0.69255
chr2R	122	10372805	10433591	0.999894	0.0339475	0.215405	0.0246988	0.420735	0.00476307	0.00045293	0.000585341	0.00168368	0.0124853	0.00325505	0.00805691	0.00198913	0.310344	0.000899073	0.999933	0.823614
chr2R	123	10433592	10493922	0.999888	0.0102905	0.120355	0.0324399	0.11406	0.00354874	0.000198351	0.000590784	0.000286155	0.00987822	0.00216054	0.00407887	0.00134785	0.263801	0.00133829	0.999926	0.862896
chr2R	124	10493923	10544900	0.999892	0.0086284	0.114236	0.0343464	0.0596853	0.0012404	0.000176327	0.000449827	0.000275232	0.00754656	0.00140465	0.000432758	0.000710158	0.192389	0.00125208	0.999941	0.964937
chr2R	125	10544901	10596839	0.999825	0.00229796	0.120502	0.0301592	0.0550457	0.0015169	6.50058e-05	0.000353885	0.000399967	0.00737998	0.00157681	6.14638e-05	0.000182351	0.140238	0.00206571	0.999921	0.990795
chr2R	126	10596840	10636957	0.999709	0.00212336	0.117384	0.0347915	0.0520718	0.00107414	0.000128159	0.00160467	0.000175637	0.00490253	0.00212291	4.56095e-05	0.00028975	0.137508	0.00323032	0.999859	0.996706
chr2R	127	10636958	10688828	0.999696	0.00267274	0.095642	0.0401655	0.0412261	0.000670812	5.83143e-05	0.00135779	0.000615201	0.00324778	0.00259471	3.38e-05	0.000511748	0.135607	0.0125658	0.999873	0.998166
chr2R	128	10688829	10724501	0.999732	0.0107143	0.0220152	0.1111	0.0447884	0.00184537	7.13181e-05	0.000269008	7.22686e-05	0.00495424	0.00537765	0.00023728	0.000941146	0.16837	0.0141572	0.999891	0.998166
chr2R	129	10724502	10792202	0.999753	0.113363	0.011905	0.19061	0.0786157	0.0040155	0.000616241	5.15478e-05	4.35112e-05	0.00900776	0.0127362	0.00064328	0.00181878	0.17762	0.0123242	0.999919	0.996762
chr2R	130	10792203	10830826	0.999695	0.167143	0.00950487	0.211457	0.0880522	0.00370086	0.00190163	1.621e-05	1.61245e-05	0.00957117	0.0136866	8.01098e-05	0.00147452	0.176945	0.00858995	0.999907	0.99808
chr2R	131	10830827	10874776	0.999691	0.178687	0.0123455	0.214877	0.0939426	0.000909619	0.0145014	1.4849e-05	3.67989e-05	0.00797346	0.011146	7.84477e-05	0.00151672	0.163054	0.000910881	0.999875	0.998092
chr2R	132	10874777	10936575	0.999731	0.179019	0.013881	0.211137	0.111504	0.00085215	0.0315069	6.48407e-05	8.38788e-05	0.00735183	0.0105753	7.86045e-05	0.00157683	0.160796	0.000273184	0.999834	0.996928
chr2R	133	10936576	11001852	0.999823	0.16652	0.0189318	0.206937	0.142558	0.00157301	0.0958051	4.93327e-05	4.96174e-05	0.00674149	0.0118564	0.000115873	0.00247137	0.162264	0.000554266	0.999826	0.99306
chr2R	134	11001853	11065639	0.999856	0.115345	0.0186636	0.204602	0.177364	0.00233561	0.183301	0.000166957	8.90385e-05	0.00651479	0.0139572	0.000615095	0.00332457	0.166855	0.00306	0.99988	0.977248
chr2R	135	11065640	11133464	0.999799	0.10959	0.0332728	0.233828	0.309761	0.0112064	0.408662	7.08155e-05	0.000320912	0.00998402	0.024097	0.00499602	0.00296911	0.183426	0.00631183	0.999856	0.951782
chr2R	136	11133465	11188654	0.999692	0.125419	0.0405123	0.242099	0.354129	0.0137268	0.496822	0.000163876	0.00191323	0.0103104	0.0265123	0.00562325	0.000343684	0.184849	0.00618	0.99982	0.949935
chr2R	137	11188655	11276113	0.999651	0.147232	0.080197	0.237943	0.369745	0.013621	0.542835	0.000133812	0.00243027	0.00907538	0.0244254	0.00387574	0.000179417	0.171818	0.00946186	0.999808	0.939709
chr2R	138	11276114	11327352	0.99973	0.152405	0.469431	0.228398	0.367851	0.0146553	0.570749	3.5448e-05	0.00343841	0.002478	0.022551	0.00293752	0.000728484	0.181003	0.00939229	0.999791	0.907628
chr2R	139	11327353	11388991	0.999868	0.147437	0.572278	0.2247	0.354468	0.0182229	0.609362	2.34929e-05	0.00306373	0.00226128	0.018747	0.00513572	0.00115863	0.202193	0.00508555	0.999854	0.777302
chr2R	140	11388992	11447344	0.999896	0.158716	0.842591	0.250157	0.343523	0.0681396	0.623208	3.3975e-05	0.00425407	0.0060938	0.016917	0.0137289	0.00173675	0.226467	0.00115605	0.99989	0.433678
chr2R	141	11447345	11508636	0.999886	0.157921	0.917278	0.255308	0.299522	0.0859495	0.623201	0.000266469	0.00335592	0.00683199	0.00701447	0.0155079	0.00118304	0.230232	0.000700495	0.99989	0.283073
chr2R	142	11508637	11589605	0.999729	0.172507	0.942524	0.294528	0.301195	0.107066	0.606899	7.92944e-05	0.000986447	0.00759082	0.00685283	0.0161058	0.00178142	0.237029	0.000256974	0.999871	0.272927
chr2R	143	11589606	11646585	0.999708	0.172473	0.948402	0.396496	0.288618	0.380401	0.536025	5.047e-05	0.000610387	0.0225805	0.00743254	0.0171065	0.00144615	0.233561	0.000166068	0.999884	0.266469
chr2R	144	11646586	11705246	0.999744	0.200713	0.947014	0.524231	0.246334	0.473098	0.509809	0.000338857	0.000103806	0.0254213	0.00667722	0.0136941	0.00208939	0.24357	0.000877936	0.999897	0.229969
chr2R	145	11705247	11756949	0.999844	0.211951	0.966497	0.746836	0.210782	0.565785	0.495143	0.00143306	4.95746e-05	0.0373205	0.00794608	0.0162405	0.00353627	0.354115	0.00920383	0.999923	0.232653
chr2R	146	11756950	11815284	0.99991	0.22256	0.971443	0.799046	0.0804035	0.600358	0.458778	0.00107086	1.42327e-05	0.0391002	0.00654549	0.0152384	0.00360338	0.380198	0.0429696	0.999934	0.226835
chr2R	147	11815285	11870589	0.999933	0.222022	0.970686	0.899793	0.0696578	0.611937	0.46043	0.000474553	2.61414e-05	0.0342799	0.00717106	0.0242381	0.00477482	0.416402	0.218721	0.999936	0.203009
chr2R	148	11870590	11935106	0.999944	0.203228	0.962408	0.923758	0.0687276	0.662036	0.445831	9.72723e-05	0.00021397	0.0350237	0.00676593	0.0254254	0.0221742	0.423074	0.327173	0.999887	0.209306
chr2R	149	11935107	11987404	0.99992	0.193315	0.946368	0.932303	0.057433	0.67254	0.409606	0.00019138	0.00180631	0.0304214	0.00394882	0.0212984	0.0294246	0.417018	0.35922	0.999901	0.288212
chr2R	150	11987405	12032912	0.999899	0.196142	0.948173	0.949913	0.0510354	0.667844	0.4085	0.00060627	0.00233198	0.0267811	0.00177597	0.0240671	0.0374513	0.41243	0.364411	0.99991	0.307181
chr2R	151	12032913	12078042	0.999794	0.238745	0.960616	0.953073	0.0466409	0.692741	0.417994	0.000560573	0.00170817	0.0333558	0.00224138	0.022798	0.056251	0.409168	0.360219	0.999903	0.317759
chr2R	152	12078043	12123225	0.999625	0.785567	0.966897	0.953424	0.0442997	0.878565	0.44762	0.00211246	0.00332888	0.0451103	0.0101286	0.0230494	0.0877534	0.412453	0.330177	0.999927	0.316359
chr2R	153	12123226	12167426	0.998886	0.924126	0.968335	0.947902	0.0339507	0.941111	0.451225	0.00339785	0.00298918	0.0467109	0.0120016	0.018374	0.0950079	0.398891	0.222699	0.999937	0.29836
chr2R	154	12167427	12205904	0.996713	0.957793	0.987705	0.926427	0.0348307	0.962064	0.440387	0.00275943	0.00306983	0.0412691	0.0102002	0.0224359	0.0936007	0.344328	0.0485228	0.999939	0.293747
chr2R	155	12205905	12257160	0.998429	0.968702	0.995048	0.854985	0.0301847	0.966419	0.39849	0.00463925	0.00142474	0.0226448	0.00204496	0.0231516	0.0779512	0.170517	0.0117891	0.999904	0.264895
chr2R	156	12257161	12308420	0.99883	0.970574	0.996984	0.550318	0.0126727	0.975018	0.399533	0.00623424	0.00212128	0.0176078	0.00151823	0.0225887	0.0666006	0.153057	0.00680989	0.999768	0.24903
chr2R	157	12308421	12352445	0.999207	0.969701	0.99727	0.282106	0.0114153	0.985062	0.410062	0.00597805	0.0011064	0.020778	0.00191298	0.0262012	0.0565118	0.137541	0.00306406	0.99977	0.261496
chr2R	158	12352446	12393936	0.999533	0.96069	0.99638	0.211181	0.00405364	0.99027	0.404979	0.00600514	0.000471818	0.0191847	0.000674303	0.0244874	0.0187154	0.0697173	0.00164146	0.999763	0.261476
chr2R	159	12393937	12442185	0.999628	0.937165	0.996109	0.14759	0.00216515	0.990917	0.373658	0.00785589	0.000158019	0.017796	0.000562708	0.0185997	0.0140354	0.0227384	0.000368957	0.999828	0.248472
chr2R	160	12442186	12477723	0.999749	0.844116	0.993445	0.111236	0.000986536	0.990824	0.36308	0.00673776	0.000176889	0.02033	0.00235958	0.0188371	0.0161512	0.0129276	0.00040877	0.999851	0.212288
chr2R	161	12477724	12524634	0.999781	0.483843	0.982556	0.0411937	0.00106214	0.988887	0.31299	0.001339	0.000142666	0.018543	0.00275446	0.0141482	0.0171095	0.0106544	9.1048e-05	0.999854	0.0642675
chr2R	162	12524635	12560708	0.999854	0.456421	0.974109	0.00746462	0.00131406	0.984834	0.241161	0.000957455	0.000748213	0.0180849	0.00363557	0.012466	0.0165493	0.00904438	2.94079e-05	0.999852	0.035924
chr2R	163	12560709	12614417	0.999916	0.35425	0.944274	0.00431759	0.000119337	0.978061	0.124566	0.000342383	0.000351515	0.0132024	0.00240679	0.00283561	0.0145783	0.00222163	0.000103516	0.999883	0.0350606
chr2R	164	12614418	12655567	0.999939	0.188666	0.876157	0.00135369	1.96685e-05	0.967047	0.0793703	0.000210721	3.74499e-05	0.00894351	0.00131711	0.00045314	0.00807295	0.00145949	0.000445986	0.999926	0.0311683
chr2R	165	12655568	12700507	0.999938	0.0166477	0.746762	0.000344034	1.36554e-05	0.966498	0.0322683	0.000321078	1.26244e-05	0.00507987	0.000185558	0.000137295	0.00608503	0.000622515	0.000219708	0.999945	0.0239592
chr2R	166	12700508	12760452	0.999946	0.00172437	0.612538	0.000182416	4.08826e-05	0.975264	0.0040217	4.75288e-05	1.67943e-05	0.00614515	0.000160539	3.37997e-05	0.0091397	0.000374642	5.26172e-05	0.999936	0.0200302
chr2R	167	12760453	12802510	0.99992	0.000452467	0.587675	0.000791772	0.000209081	0.97756	0.00172191	5.58445e-05	4.79801e-05	0.0239176	0.00105221	7.14786e-05	0.0399997	0.000387657	0.000115453	0.999907	0.0249134
chr2R	168	12802511	12856705	0.999944	0.000606562	0.591026	0.00156448	0.000472816	0.985544	0.00057882	3.39305e-05	1.53174e-05	0.053522	0.00362483	7.73476e-05	0.0746803	0.000243467	0.000119672	0.999918	0.0876718
chr2R	169	12856706	12910157	0.999938	0.00287478	0.670888	0.0024996	0.00262072	0.991185	0.000891955	2.5776e-05	3.48234e-05	0.121039	0.00697931	0.000574787	0.118	0.0010689	3.6458e-05	0.999924	0.249192
chr2R	170	12910158	12986347	0.999941	0.0302074	0.692083	0.0100895	0.00262946	0.992045	0.00382652	8.37579e-05	7.34754e-05	0.136325	0.00690682	0.00545532	0.127688	0.00237596	8.80037e-05	0.999939	0.312239
chr2R	171	12986348	13062147	0.99992	0.0776523	0.852174	0.0126399	0.00488073	0.990349	0.00386792	0.000877738	0.000356021	0.219183	0.00473787	0.0069123	0.154678	0.0154632	0.000374151	0.999928	0.332066
chr2R	172	13062148	13109558	0.999834	0.142188	0.888675	0.0161567	0.00533476	0.989574	0.00176674	0.000595415	0.00018352	0.332073	0.00692691	0.00891049	0.25781	0.115624	7.72959e-05	0.999854	0.362852
chr2R	173	13109559	13166781	0.999837	0.157366	0.900357	0.0202625	0.00741065	0.989768	0.00218104	8.56537e-05	3.99309e-05	0.459532	0.0353078	0.0216419	0.374885	0.231832	0.000117328	0.999819	0.370634
chr2R	174	13166782	13224187	0.999744	0.263467	0.903247	0.0247703	0.0102213	0.990402	0.00828896	9.02908e-05	2.30965e-05	0.542989	0.0536691	0.0359361	0.541993	0.307866	9.85249e-05	0.999752	0.362669
chr2R	175	13224188	13291427	0.999517	0.297922	0.898903	0.0307944	0.0133078	0.992011	0.0843695	0.00054902	7.65067e-05	0.597509	0.0653251	0.0521255	0.651538	0.35745	0.000257183	0.999755	0.322643
chr2R	176	13291428	13364211	0.999269	0.330989	0.878278	0.0732903	0.0188706	0.994698	0.1013	5.88748e-05	2.50861e-05	0.689213	0.0813206	0.208927	0.766122	0.41968	5.41848e-05	0.999821	0.326142
chr2R	177	13364212	13421279	0.998581	0.4678	0.88279	0.147218	0.0689727	0.998031	0.162162	2.5861e-05	6.3531e-05	0.880411	0.138657	0.422493	0.923155	0.493678	0.00014521	0.999742	0.335997
chr2R	178	13421280	13499986	0.995558	0.503373	0.877169	0.166974	0.559552	0.999268	0.176303	0.000132244	0.00036509	0.940835	0.159829	0.481095	0.970499	0.517176	0.00147583	0.999803	0.448233
chr2R	179	13499987	13542476	0.996744	0.537592	0.887441	0.171031	0.851833	0.999699	0.182295	0.000290615	8.81337e-05	0.955107	0.165296	0.49584	0.982426	0.521848	0.0110291	0.99981	0.491771
chr2R	180	13542477	13587524	0.998739	0.879543	0.900891	0.177889	0.924029	0.999784	0.250214	0.000357407	0.000210586	0.980552	0.206116	0.509926	0.985201	0.590017	0.109769	0.999847	0.518104
chr2R	181	13587525	13637148	0.999389	0.959783	0.903704	0.17217	0.942123	0.999817	0.265248	0.000438369	0.000222381	0.990896	0.216244	0.511956	0.985159	0.608533	0.13664	0.999867	0.844255
chr2R	182	13637149	13693452	0.99963	0.984813	0.897105	0.148843	0.946757	0.99977	0.269505	0.000447488	0.000837056	0.993865	0.214271	0.497603	0.980666	0.608063	0.143318	0.999851	0.922593
chr2R	183	13693453	13741743	0.999705	0.990669	0.869045	0.0652835	0.944309	0.999414	0.261531	0.00251611	0.00071597	0.994096	0.19332	0.433647	0.966796	0.593262	0.142279	0.999715	0.971065
chr2R	184	13741744	13779566	0.99985	0.991899	0.853521	0.0561895	0.942904	0.99883	0.219562	0.00249686	7.26363e-05	0.99764	0.199804	0.377409	0.931276	0.58056	0.129923	0.999706	0.984684
chr2R	185	13779567	13812506	0.999843	0.990924	0.81458	0.0490155	0.929934	0.996457	0.040759	0.000267206	1.81859e-05	0.998586	0.200448	0.269926	0.793999	0.558331	0.0880796	0.999788	0.988202
chr2R	186	13812507	13859752	0.999904	0.987466	0.698203	0.0420255	0.911292	0.992544	0.0139568	9.59443e-05	1.43315e-05	0.99848	0.205805	0.263108	0.783542	0.558549	0.00808395	0.999815	0.988147
chr2R	187	13859753	13906607	0.9999	0.984053	0.476998	0.0389915	0.848547	0.97881	0.00352015	0.000199312	1.82276e-05	0.998182	0.200655	0.255769	0.747214	0.547584	0.00181817	0.999784	0.98629
chr2R	188	13906608	13955053	0.999922	0.984773	0.350053	0.0364094	0.587109	0.933455	0.00229604	0.000135092	4.40637e-05	0.996094	0.169859	0.218125	0.638191	0.501403	0.00132477	0.999845	0.992993
chr2R	189	13955054	14010443	0.999884	0.984076	0.333706	0.047724	0.16414	0.817872	0.00272956	0.000101226	0.000225538	0.989683	0.119405	0.0917133	0.610067	0.360027	0.00317569	0.999793	0.996534
chr2R	190	14010444	14080227	0.999934	0.98858	0.336034	0.0610955	0.0519842	0.790023	0.00393654	0.000632964	0.000398447	0.983471	0.0905894	0.00795236	0.586435	0.24714	0.00507781	0.999876	0.997583
chr2R	191	14080228	14134100	0.999941	0.991287	0.405451	0.0624878	0.0222784	0.67572	0.00318202	0.00141676	0.0001712	0.985466	0.0885358	0.00138284	0.512199	0.240049	0.0146522	0.999902	0.998036
chr2R	192	14134101	14184365	0.99993	0.990899	0.798107	0.0648252	0.0206941	0.190421	0.00384896	0.0019594	0.000125678	0.984531	0.086084	0.000416806	0.510427	0.235211	0.0345019	0.999895	0.998089
chr2R	193	14184366	14231508	0.999844	0.987013	0.922277	0.0702211	0.0187887	0.123282	0.00225571	0.00246545	0.000532105	0.979158	0.0737673	0.000464229	0.501243	0.219406	0.167122	0.999901	0.996826
chr2R	194	14231509	14302631	0.99988	0.98981	0.951781	0.0764298	0.0171042	0.0784626	0.00236786	0.00211272	0.000924267	0.975886	0.0744153	0.00055566	0.493583	0.20916	0.706322	0.999929	0.991952
chr2R	195	14302632	14354918	0.999826	0.989464	0.958978	0.073939	0.0161325	0.0705676	0.000475783	0.000440899	0.000130294	0.974049	0.109377	0.00312641	0.503326	0.222813	0.868913	0.999903	0.993162
chr2R	196	14354919	14397301	0.999809	0.987838	0.959914	0.0596012	0.0148594	0.0690508	0.00049281	0.000515738	7.27447e-05	0.972269	0.11732	0.00343984	0.497417	0.226511	0.913742	0.999901	0.997519
chr2R	197	14397302	14437985	0.999877	0.989783	0.978275	0.0598599	0.0162008	0.0904271	0.000459916	0.000651173	6.03245e-05	0.971101	0.128752	0.0122952	0.492762	0.233822	0.932137	0.999846	0.998448
chr2R	198	14437986	14495971	0.999863	0.989374	0.982258	0.0573139	0.0132761	0.10055	0.00146684	0.00193394	6.77439e-05	0.964796	0.129158	0.0139007	0.470428	0.2279	0.944057	0.999889	0.998313
chr2R	199	14495972	14541110	0.999677	0.985547	0.985449	0.0444063	0.00512145	0.107186	0.00102365	0.00295907	0.000553824	0.955403	0.122797	0.0126903	0.414118	0.209513	0.951528	0.999893	0.996768
chr2R	200	14541111	14576553	0.999528	0.974052	0.986213	0.0190337	0.00194968	0.10378	0.000783833	0.00279159	0.000498265	0.931579	0.103503	0.0145281	0.173496	0.145329	0.956082	0.999918	0.997594
chr2R	201	14576554	14617096	0.999392	0.925505	0.985636	0.00439073	0.0023181	0.0904528	0.000672507	0.000418349	5.57777e-05	0.910465	0.0881649	0.0127142	0.122929	0.0979755	0.958472	0.999904	0.997111
chr2R	202	14617097	14658716	0.999051	0.907081	0.985166	0.00284855	0.00311305	0.0536682	0.00178683	0.000177657	2.38379e-05	0.904544	0.0842877	0.0175058	0.0780585	0.095943	0.957445	0.999858	0.994163
chr2R	203	14658717	14699994	0.997726	0.911066	0.987476	0.00451806	0.00388763	0.0505252	0.0046321	0.000621733	7.45864e-05	0.89976	0.0836314	0.0259965	0.0421412	0.0944292	0.954705	0.999765	0.991294
chr2R	204	14699995	14752978	0.99892	0.911248	0.993883	0.0038877	0.00634224	0.0516317	0.00457531	0.00114989	0.000209315	0.88465	0.0825939	0.0272287	0.0405487	0.0904311	0.943499	0.999764	0.994463
chr2R	205	14752979	14805272	0.999174	0.905029	0.995953	0.00243406	0.00751994	0.0505435	0.00205205	0.000361187	3.55762e-05	0.852475	0.0755928	0.0245749	0.0336623	0.0825835	0.896973	0.999692	0.994922
chr2R	206	14805273	14851700	0.999428	0.894421	0.99588	0.00142668	0.00577003	0.0431899	0.0014534	0.000540836	2.38255e-05	0.71747	0.0478745	0.0101543	0.00907673	0.053557	0.708461	0.999671	0.994643
chr2R	207	14851701	14904484	0.999683	0.896724	0.998306	0.000980913	0.00536439	0.0353271	0.000229668	0.000105684	4.52384e-05	0.652858	0.0472869	0.00318406	0.00551281	0.0502451	0.687736	0.999699	0.992282
chr2R	208	14904485	14951272	0.999783	0.89118	0.998737	0.000795333	0.00558695	0.038441	0.000224083	0.000149934	0.000101446	0.632229	0.0493969	0.000837605	0.00655909	0.04947	0.694036	0.999776	0.981527
chr2R	209	14951273	14997824	0.999805	0.896605	0.999339	0.000505345	0.00307952	0.0840128	0.000503127	0.000480214	0.000358364	0.616298	0.0844904	0.000150238	0.0202604	0.0498921	0.726609	0.999781	0.93725
chr2R	210	14997825	15038355	0.999782	0.922264	0.99935	7.84886e-05	0.00268931	0.201385	0.00450309	0.00141877	0.000599812	0.621102	0.532711	0.000197714	0.179208	0.0525446	0.899453	0.999781	0.795249
chr2R	211	15038356	15082107	0.999836	0.935517	0.99912	6.05642e-05	0.00314486	0.348273	0.0206871	0.0114646	0.00230446	0.628556	0.869482	0.000918215	0.272785	0.0591972	0.947139	0.999858	0.254522
chr2R	212	15082108	15124340	0.999851	0.93721	0.998066	0.000410644	0.0049037	0.516025	0.175668	0.0173983	0.00227969	0.63754	0.957915	0.00272062	0.414217	0.0676756	0.960088	0.999885	0.211305
chr2R	213	15124341	15176900	0.999898	0.962291	0.995365	0.00405119	0.00735619	0.625983	0.349565	0.0176605	0.00751409	0.64658	0.987708	0.00469058	0.627977	0.0759775	0.987774	0.999929	0.0321211
chr2R	214	15176901	15231277	0.999915	0.977802	0.986636	0.00461077	0.0399062	0.658534	0.39026	0.0133409	0.00903588	0.704281	0.995382	0.00434751	0.698271	0.18005	0.994381	0.999929	0.0172488
chr2R	215	15231278	15269343	0.999845	0.992926	0.957666	0.00407473	0.162602	0.669371	0.406977	0.0110362	0.00958455	0.734218	0.99709	0.00454944	0.741486	0.321782	0.99575	0.999863	0.0148481
chr2R	216	15269344	15314085	0.999871	0.996502	0.897605	0.00254339	0.201002	0.675072	0.405627	0.00370125	0.00698687	0.745533	0.998248	0.0032967	0.756491	0.36295	0.996599	0.999873	0.0132399
chr2R	217	15314086	15376626	0.999839	0.998042	0.650905	0.00349981	0.358412	0.772055	0.394515	0.00332676	0.00406736	0.742681	0.999123	0.00400687	0.784108	0.442615	0.99713	0.999893	0.0102839
chr2R	218	15376627	15424304	0.999877	0.999044	0.626637	0.00320824	0.660433	0.91886	0.416683	0.00362091	0.00362468	0.763357	0.999495	0.0143156	0.883405	0.74402	0.996589	0.999915	0.00395501
chr2R	219	15424305	15487179	0.999797	0.999123	0.52503	0.00335656	0.792691	0.960973	0.417939	0.00366672	0.00557115	0.766664	0.99968	0.0162992	0.90886	0.820241	0.993999	0.999861	0.00340009
chr2R	220	15487180	15550272	0.999647	0.999551	0.444003	0.00330217	0.879473	0.988687	0.42353	0.00461543	0.00764963	0.766399	0.999588	0.0168767	0.94292	0.870198	0.990283	0.999774	0.00676825
chr2R	221	15550273	15654143	0.999531	0.999828	0.439315	0.00393621	0.966409	0.995526	0.425301	0.00904712	0.00666531	0.770807	0.999522	0.0175986	0.983618	0.926177	0.97396	0.999761	0.00705673
chr2R	222	15654144	15720077	0.999515	0.999866	0.417195	0.00222394	0.98923	0.996995	0.441665	0.00964541	0.0085731	0.764829	0.99946	0.036797	0.994663	0.938988	0.912232	0.999833	0.00395368
chr2R	223	15720078	15781656	0.999615	0.99982	0.340163	0.00169352	0.99452	0.998596	0.441437	0.00648503	0.0139863	0.776082	0.999363	0.0943019	0.997199	0.953842	0.743285	0.999762	0.00426292
chr2R	224	15781657	15850406	0.999747	0.999695	0.105869	0.00146883	0.996797	0.999485	0.421913	0.00473315	0.0149588	0.790049	0.999767	0.328232	0.999075	0.970785	0.183093	0.999727	0.00188867
chr2R	225	15850407	15906614	0.999659	0.999644	0.0873968	0.0011313	0.998471	0.999661	0.411502	0.00612482	0.0148456	0.890829	0.999864	0.398464	0.999521	0.97962	0.0345264	0.99975	0.00168911
chr2R	226	15906615	15953595	0.999668	0.999313	0.0441759	0.00227542	0.999179	0.999689	0.363938	0.00574251	0.00933383	0.919848	0.99984	0.413725	0.999605	0.981573	0.0059778	0.999691	0.00523997
chr2R	227	15953596	16011494	0.999723	0.999164	0.0382276	0.00347682	0.999714	0.999768	0.218404	0.00442031	0.00521745	0.929123	0.99992	0.411707	0.999718	0.980174	0.00382727	0.999685	0.011067
chr2R	228	16011495	16061565	0.999836	0.998806	0.0416119	0.0060787	0.99989	0.999904	0.193142	0.00310282	0.00143434	0.945587	0.999924	0.39156	0.999871	0.976564	0.00545311	0.99973	0.0115517
chr2R	229	16061566	16109934	0.999913	0.997168	0.0538972	0.032041	0.999914	0.999921	0.188511	0.000510671	0.0005193	0.9556	0.999897	0.302005	0.999902	0.972972	0.0047629	0.999853	0.0277834
chr2R	230	16109935	16150071	0.999939	0.999227	0.0746416	0.0859303	0.999873	0.99993	0.215772	0.000129345	0.000588079	0.956569	0.999814	0.297689	0.999846	0.96554	0.00971534	0.999929	0.0325568
chr2R	231	16150072	16191137	0.999918	0.999703	0.0944305	0.0978782	0.999694	0.999923	0.219396	6.43284e-05	0.000203763	0.952558	0.999688	0.267446	0.99959	0.935159	0.0142754	0.999938	0.0996764
chr2R	232	16191138	16245407	0.999873	0.999803	0.327269	0.100126	0.999082	0.999886	0.212456	2.08509e-05	0.000384144	0.936883	0.999209	0.155613	0.99876	0.833683	0.048478	0.999901	0.449125
chr2R	233	16245408	16304562	0.999826	0.999852	0.449656	0.0942152	0.996444	0.999789	0.199162	3.0289e-05	0.000948175	0.876794	0.998165	0.0393752	0.995853	0.416997	0.226576	0.999739	0.533974
chr2R	234	16304563	16351022	0.999725	0.999832	0.481333	0.091847	0.992831	0.999696	0.176371	0.000241744	0.000547863	0.872935	0.993827	0.029605	0.997051	0.111176	0.281752	0.999711	0.55293
chr2R	235	16351023	16397375	0.999673	0.999778	0.518356	0.0906849	0.993238	0.999848	0.18154	0.00116401	5.53574e-05	0.870224	0.993432	0.0207891	0.998529	0.0569485	0.408085	0.999806	0.555254
chr2R	236	16397376	16436650	0.999749	0.999803	0.55398	0.0937499	0.991521	0.999819	0.19921	0.00435098	2.48995e-05	0.871496	0.989552	0.0203476	0.99868	0.0428043	0.49651	0.999748	0.543957
chr2R	237	16436651	16482123	0.99974	0.999736	0.662347	0.100598	0.995435	0.999896	0.247301	0.00534918	7.39107e-05	0.913873	0.988754	0.0239136	0.99877	0.034868	0.830904	0.999749	0.50077
chr2R	238	16482124	16526016	0.999814	0.999776	0.810205	0.110467	0.996806	0.999854	0.293499	0.0165768	0.000204397	0.9436	0.995381	0.0223233	0.999303	0.0377839	0.910614	0.99986	0.417932
chr2R	239	16526017	16574142	0.999766	0.99966	0.853462	0.13224	0.996867	0.999857	0.482825	0.11429	0.00211985	0.961942	0.997383	0.0281491	0.999353	0.0403348	0.929749	0.999854	0.412078
chr2R	240	16574143	16617619	0.999786	0.999664	0.881714	0.136263	0.996807	0.999809	0.52693	0.138568	0.00204119	0.97396	0.99876	0.0309346	0.999375	0.0407916	0.942155	0.999833	0.397008
chr2R	241	16617620	16684132	0.999883	0.999715	0.889875	0.141091	0.995494	0.999571	0.538598	0.142487	0.00666289	0.976118	0.999646	0.0282331	0.999133	0.035535	0.950073	0.999905	0.400483
chr2R	242	16684133	16734461	0.999909	0.999428	0.893975	0.217456	0.997565	0.99985	0.545438	0.137254	0.00732933	0.986671	0.999852	0.0368743	0.999696	0.0424656	0.950268	0.999926	0.42012
chr2R	243	16734462	16767372	0.999859	0.998457	0.890285	0.240891	0.997974	0.999907	0.538952	0.117101	0.0051296	0.989419	0.999904	0.0373012	0.999849	0.0425445	0.946302	0.999921	0.558594
chr2R	244	16767373	16808490	0.999789	0.996615	0.876714	0.267432	0.997223	0.999915	0.511916	0.105994	0.00395179	0.99361	0.999898	0.0420126	0.999849	0.0448125	0.935399	0.999891	0.592248
chr2R	245	16808491	16851668	0.999796	0.993699	0.8347	0.37789	0.99484	0.999862	0.401894	0.0627325	0.000450852	0.994471	0.999909	0.0829888	0.999716	0.0873203	0.900364	0.999843	0.603425
chr2R	246	16851669	16884055	0.999854	0.986404	0.727144	0.766694	0.993407	0.999911	0.344809	0.0309121	0.000183464	0.994848	0.999909	0.128594	0.999827	0.139889	0.864144	0.999894	0.598732
chr2R	247	16884056	16929179	0.999826	0.96147	0.699334	0.860052	0.997836	0.999901	0.285457	0.0251617	0.000507765	0.998582	0.999892	0.576458	0.999866	0.770543	0.747483	0.999912	0.576123
chr2R	248	16929180	16963006	0.999885	0.9193	0.578606	0.886805	0.999353	0.999921	0.0580603	0.00256368	9.56393e-05	0.99956	0.999934	0.853283	0.999888	0.936166	0.389341	0.999933	0.522639
chr2R	249	16963007	16995931	0.999934	0.798181	0.571423	0.892598	0.999769	0.999903	0.0143768	0.000382187	3.57897e-05	0.999761	0.999938	0.923369	0.99982	0.980013	0.362028	0.999918	0.359355
chr2R	250	16995932	17040097	0.999936	0.52174	0.550347	0.888607	0.999824	0.999867	0.00792058	4.78258e-05	6.35369e-05	0.999857	0.999924	0.941273	0.999542	0.992963	0.351547	0.999937	0.265678
chr2R	251	17040098	17095860	0.999917	0.448747	0.55548	0.871582	0.999697	0.999673	0.00863222	4.94783e-05	0.000607362	0.999829	0.999875	0.944221	0.998675	0.997038	0.319574	0.999939	0.258726
chr2R	252	17095861	17140643	0.999938	0.421127	0.556876	0.829878	0.999189	0.999093	0.00655138	4.98287e-05	0.000165439	0.999589	0.999705	0.940216	0.995895	0.998375	0.18751	0.999946	0.251248
chr2R	253	17140644	17176831	0.999919	0.375531	0.553397	0.762246	0.997884	0.996972	0.00619503	0.000112362	4.20728e-05	0.999105	0.999389	0.93131	0.993205	0.998517	0.173223	0.999941	0.264386
chr2R	254	17176832	17240192	0.999895	0.37848	0.528918	0.751784	0.992653	0.988385	0.00806336	0.000133857	0.00012335	0.999521	0.999539	0.913704	0.996177	0.998355	0.160678	0.999918	0.431507
chr2R	255	17240193	17287909	0.999838	0.384734	0.464396	0.712731	0.970434	0.959362	0.00718315	4.92829e-05	0.000345867	0.999548	0.999313	0.837343	0.996777	0.997079	0.172037	0.999869	0.548579
chr2R	256	17287910	17333468	0.999907	0.375435	0.229549	0.604751	0.928325	0.95851	0.00188842	9.03548e-05	0.000229168	0.999109	0.998291	0.808169	0.996169	0.992422	0.330412	0.999927	0.59252
chr2R	257	17333469	17373533	0.999923	0.370244	0.209988	0.440066	0.894925	0.958294	0.000365738	5.4679e-05	8.08765e-05	0.998959	0.999404	0.792159	0.995924	0.993632	0.659874	0.999914	0.601638
chr2R	258	17373534	17416064	0.99988	0.374578	0.189501	0.424279	0.865396	0.958802	6.50723e-05	1.92117e-05	0.000308284	0.999357	0.999673	0.784229	0.996276	0.99528	0.804169	0.999826	0.596951
chr2R	259	17416065	17459413	0.99984	0.431494	0.196075	0.44011	0.841874	0.959973	8.63967e-05	2.60224e-05	0.000100153	0.999693	0.999704	0.777872	0.997008	0.997414	0.898866	0.999821	0.566949
chr2R	260	17459414	17509913	0.999868	0.460835	0.19445	0.444075	0.817558	0.958581	0.000609423	7.02576e-05	2.11665e-05	0.99985	0.999784	0.802338	0.996333	0.997889	0.959518	0.999877	0.465104
chr2R	261	17509914	17556450	0.999876	0.489023	0.234199	0.431307	0.717472	0.949473	0.00327903	2.26866e-05	3.19164e-05	0.999814	0.999867	0.807862	0.992826	0.997424	0.984214	0.99988	0.43692
chr2R	262	17556451	17596376	0.999931	0.497238	0.501558	0.408476	0.30635	0.923668	0.00330089	8.76906e-05	0.000154206	0.999635	0.999871	0.820063	0.978422	0.994554	0.99141	0.999889	0.370971
chr2R	263	17596377	17647599	0.999933	0.493186	0.606253	0.344263	0.227562	0.815692	0.000945455	0.000141486	0.000534216	0.998958	0.999705	0.822516	0.976518	0.991768	0.99422	0.999759	0.354704
chr2R	264	17647600	17681693	0.999882	0.488722	0.707136	0.340889	0.107164	0.808804	0.000726245	0.000151805	0.000134969	0.998727	0.999794	0.82606	0.975358	0.989541	0.996066	0.999695	0.311643
chr2R	265	17681694	17731469	0.999779	0.490983	0.735393	0.344621	0.0952552	0.809233	0.00244368	0.00103825	4.54845e-05	0.998967	0.9997	0.831253	0.974914	0.987874	0.997352	0.9997	0.241383
chr2R	266	17731470	17771788	0.999793	0.47567	0.747988	0.416521	0.0494567	0.796327	0.00212878	0.000702068	0.000203615	0.998619	0.99971	0.826948	0.967915	0.983177	0.998215	0.999804	0.233453
chr2R	267	17771789	17809716	0.999855	0.463288	0.910074	0.463379	0.00851824	0.775789	0.00191526	0.000496351	0.000375141	0.99811	0.999776	0.82557	0.962347	0.978676	0.998795	0.999821	0.237785
chr2R	268	17809717	17853166	0.999761	0.478916	0.955785	0.515791	0.00321163	0.765052	0.00177799	6.61893e-05	0.000434601	0.997908	0.999883	0.826481	0.957776	0.976007	0.999366	0.999873	0.230009
chr2R	269	17853167	17892974	0.999643	0.522379	0.96989	0.575103	0.00145957	0.742744	0.000318594	7.91794e-05	0.000988656	0.998028	0.999896	0.832192	0.961352	0.974003	0.999776	0.999923	0.208646
chr2R	270	17892975	17939931	0.999235	0.548677	0.979795	0.885935	0.00158116	0.739849	0.000343843	6.44894e-05	0.000711338	0.997579	0.999896	0.882896	0.960942	0.985527	0.999861	0.999916	0.193341
chr2R	271	17939932	17979578	0.997736	0.88635	0.981566	0.960074	0.00500375	0.73958	0.00154118	0.000465247	0.00192414	0.996846	0.999837	0.959205	0.961602	0.993146	0.999845	0.999922	0.201139
chr2R	272	17979579	18026587	0.991621	0.96751	0.979621	0.990085	0.00520778	0.724077	0.00156557	0.000363033	0.00393732	0.992822	0.999697	0.978472	0.957381	0.994785	0.999814	0.999905	0.196277
chr2R	273	18026588	18071783	0.977178	0.989926	0.983257	0.997153	0.0109892	0.736761	0.00025079	0.000106098	0.00631635	0.990169	0.999407	0.985929	0.946511	0.99808	0.999816	0.999909	0.178823
chr2R	274	18071784	18131533	0.924886	0.997336	0.983031	0.998847	0.0143949	0.739377	0.000176718	0.000329703	0.0150402	0.979148	0.998715	0.987365	0.90536	0.999077	0.99961	0.999864	0.185424
chr2R	275	18131534	18186557	0.735588	0.999256	0.993751	0.999582	0.0135563	0.732042	0.00067528	0.0011504	0.0173243	0.940736	0.997151	0.986294	0.793904	0.999163	0.999419	0.999846	0.289091
chr2R	276	18186558	18244214	0.303579	0.999719	0.997266	0.999789	0.0227614	0.751444	0.00435759	0.000665871	0.0166574	0.906531	0.998773	0.987784	0.757093	0.998623	0.998447	0.999794	0.317035
chr2R	277	18244215	18292044	0.270216	0.999862	0.99801	0.999841	0.0241406	0.753942	0.00497622	0.000198602	0.0137785	0.767666	0.99908	0.986418	0.758266	0.996927	0.9971	0.999804	0.326285
chr2R	278	18292045	18351537	0.274767	0.999821	0.997626	0.99987	0.0264592	0.746387	0.014535	0.000318703	0.00153296	0.73903	0.998816	0.981608	0.763272	0.995638	0.995128	0.999896	0.322508
chr2R	279	18351538	18398275	0.337673	0.999715	0.995676	0.999861	0.0529537	0.750848	0.108474	0.000431255	0.000591248	0.714081	0.998141	0.977566	0.769759	0.995955	0.996631	0.999919	0.314725
chr2R	280	18398276	18452946	0.821361	0.999211	0.997778	0.999878	0.0887716	0.75872	0.139092	0.00253144	0.000899568	0.696441	0.996439	0.983717	0.765477	0.994399	0.998616	0.999906	0.275722
chr2R	281	18452947	18514311	0.943928	0.99911	0.999354	0.999768	0.148691	0.77083	0.145072	0.00257591	0.000206909	0.689857	0.989195	0.994987	0.762889	0.994188	0.999395	0.999853	0.278873
chr2R	282	18514312	18566279	0.977797	0.998305	0.999741	0.999563	0.230296	0.887854	0.1407	0.000307836	0.000330261	0.701996	0.978999	0.998085	0.755633	0.994121	0.999625	0.999902	0.271118
chr2R	283	18566280	18610512	0.988931	0.994547	0.99983	0.998882	0.254174	0.914453	0.11537	0.000150906	6.8411e-05	0.699148	0.936888	0.998721	0.764518	0.991705	0.999487	0.999926	0.231147
chr2R	284	18610513	18661146	0.996838	0.994188	0.999843	0.99737	0.257675	0.921283	0.0179363	0.000598979	4.51283e-05	0.674039	0.797245	0.998484	0.762076	0.987742	0.998861	0.9999	0.225645
chr2R	285	18661147	18718818	0.999119	0.993222	0.999826	0.99142	0.26846	0.933946	0.00444353	6.34451e-05	0.000271981	0.67594	0.75092	0.99699	0.793549	0.990916	0.99799	0.999896	0.201207
chr2R	286	18718819	18756662	0.999705	0.992387	0.999673	0.990941	0.278635	0.940094	0.00365434	2.10839e-05	7.71839e-05	0.732282	0.752278	0.994182	0.798694	0.994152	0.995272	0.99991	0.199706
chr2R	287	18756663	18829420	0.999844	0.992316	0.99919	0.996908	0.394463	0.938974	0.00451649	7.51605e-05	0.000241501	0.901816	0.817211	0.994908	0.887302	0.994436	0.996546	0.999911	0.181179
chr2R	288	18829421	18882549	0.999796	0.993001	0.998358	0.998685	0.421085	0.927287	0.00330227	0.000615299	0.00234	0.946632	0.851171	0.994605	0.908546	0.99259	0.997955	0.999819	0.154038
chr2R	289	18882550	18932380	0.999822	0.991914	0.998575	0.999444	0.604206	0.931513	0.00492302	0.000191537	0.0174377	0.957393	0.890888	0.993837	0.91932	0.992107	0.998855	0.999813	0.13892
chr2R	290	18932381	18970836	0.999906	0.997114	0.99909	0.999777	0.808709	0.979161	0.0101026	0.00047661	0.0227685	0.972429	0.93649	0.997795	0.973861	0.992389	0.99953	0.999874	0.0836804
chr2R	291	18970837	19019188	0.9999	0.999177	0.999	0.999871	0.873263	0.994022	0.070982	0.00431363	0.0237475	0.9756	0.946894	0.998643	0.992416	0.98981	0.999664	0.999859	0.0261559
chr2R	292	19019189	19068845	0.99984	0.999671	0.999489	0.999844	0.894652	0.998292	0.666828	0.00850997	0.0225227	0.975978	0.949186	0.999318	0.99765	0.993163	0.999656	0.999795	0.00377146
chr2R	293	19068846	19113998	0.999759	0.999841	0.999434	0.999797	0.899924	0.999359	0.808904	0.0193907	0.013226	0.971542	0.949988	0.999364	0.998975	0.99521	0.999652	0.99974	0.00148068
chr2R	294	19113999	19159523	0.999748	0.99982	0.998873	0.999832	0.948285	0.999784	0.945891	0.0212952	0.00789205	0.978557	0.955433	0.99968	0.99918	0.997818	0.999692	0.99975	0.00196845
chr2R	295	19159524	19208962	0.999806	0.999671	0.997291	0.999847	0.980316	0.999869	0.978542	0.0182602	0.00483688	0.979093	0.95404	0.999738	0.998669	0.998336	0.999785	0.999819	0.00134865
chr2R	296	19208963	19280220	0.999855	0.999839	0.990935	0.999853	0.989288	0.999862	0.985886	0.0024339	0.00631253	0.992785	0.968784	0.999869	0.996859	0.999019	0.999879	0.999907	0.000983548
chr2R	297	19280221	19328671	0.999832	0.999886	0.967914	0.999791	0.991307	0.999699	0.987046	0.000855106	0.00690978	0.996105	0.971896	0.999907	0.989614	0.999043	0.999883	0.999895	0.00167101
chr2R	298	19328672	19373266	0.999776	0.999898	0.89638	0.99981	0.992436	0.999551	0.990123	0.000682694	0.00494767	0.9981	0.97182	0.999908	0.978782	0.99901	0.999892	0.999857	0.00283756
chr2R	299	19373267	19429762	0.999694	0.999801	0.679636	0.999881	0.993293	0.99951	0.990314	7.35513e-05	0.000625366	0.99889	0.971144	0.999934	0.964299	0.99891	0.999903	0.999921	0.00267096
chr2R	300	19429763	19482938	0.999285	0.999456	0.595704	0.999883	0.992211	0.999014	0.987242	3.56317e-05	0.000242176	0.999059	0.96469	0.999904	0.921048	0.997788	0.999898	0.999913	0.00645693
chr2R	301	19482939	19525083	0.997949	0.998134	0.586152	0.99975	0.989107	0.996785	0.975302	0.000149228	0.000689773	0.999021	0.938995	0.999755	0.859462	0.995696	0.999825	0.999814	0.00806303
chr2R	302	19525084	19573957	0.993851	0.999465	0.609725	0.999384	0.987866	0.99761	0.940044	0.000697563	0.000129401	0.998872	0.936715	0.99914	0.854994	0.996281	0.999838	0.999828	0.00678208
chr2R	303	19573958	19626787	0.984102	0.999762	0.642665	0.998952	0.995572	0.997414	0.847069	0.00184288	0.000220251	0.998628	0.925334	0.998698	0.863123	0.996018	0.999827	0.999914	0.000959188
chr2R	304	19626788	19680557	0.947195	0.999795	0.7009	0.997361	0.997793	0.996411	0.834119	0.00527594	0.000667155	0.998351	0.889147	0.996654	0.861367	0.994373	0.999781	0.999921	0.000582364
chr2R	305	19680558	19734643	0.813586	0.999841	0.715094	0.998845	0.999237	0.999001	0.823105	0.00918477	0.00112344	0.998378	0.883673	0.99763	0.874898	0.998251	0.999778	0.999906	0.00118665
chr2R	306	19734644	19811331	0.675017	0.999698	0.713206	0.999178	0.999512	0.999648	0.775469	0.00905305	0.00502614	0.998873	0.893735	0.997573	0.899568	0.999392	0.999822	0.999927	0.000521363
chr2R	307	19811332	19883988	0.309529	0.999154	0.692172	0.999471	0.999523	0.999799	0.775666	0.00472763	0.00607447	0.998718	0.921845	0.996668	0.903982	0.999612	0.999828	0.999933	5.33106e-05
chr2R	308	19883989	19941245	0.239545	0.997169	0.599796	0.999536	0.999047	0.999844	0.764768	0.00144427	0.00533334	0.997268	0.930848	0.993307	0.90168	0.999517	0.999733	0.99994	2.09721e-05
chr2R	309	19941246	20006829	0.228496	0.991984	0.594827	0.999503	0.997289	0.999731	0.766545	0.00145413	0.00503709	0.991244	0.933052	0.982008	0.884825	0.998921	0.999601	0.999902	8.53459e-05
chr2R	310	20006830	20096050	0.192057	0.970619	0.561981	0.999237	0.991197	0.999199	0.756041	0.000151561	0.00448311	0.970178	0.92788	0.953217	0.824767	0.996957	0.999464	0.999841	0.000761209
chr2R	311	20096051	20162421	0.183815	0.888162	0.420647	0.998907	0.977101	0.998282	0.714549	2.53666e-05	0.000424604	0.907653	0.909091	0.885376	0.677007	0.991328	0.999324	0.999876	0.000363295
chr2R	312	20162422	20222738	0.151693	0.77069	0.373808	0.998443	0.935219	0.998786	0.691362	4.23311e-05	8.22006e-05	0.718203	0.910789	0.629059	0.568715	0.967513	0.999284	0.999838	5.06188e-05
chr2R	313	20222739	20318221	0.128247	0.345293	0.167513	0.997777	0.933367	0.999101	0.70022	3.15817e-05	0.00015843	0.703058	0.916451	0.594202	0.540819	0.953568	0.998942	0.999622	6.90454e-05
chr2R	314	20318222	20388328	0.0942858	0.232615	0.0874229	0.995953	0.924773	0.998668	0.694534	0.000141283	0.00103706	0.634673	0.913421	0.465955	0.435174	0.902515	0.999173	0.998853	4.8118e-05
chr2R	315	20388329	20475631	0.0815321	0.218069	0.0285575	0.993243	0.892896	0.996863	0.665385	0.000188702	0.00273945	0.352967	0.89707	0.332802	0.0858399	0.688304	0.998756	0.995863	1.36275e-05
chr2R	316	20475632	20589005	0.0747359	0.166263	0.0241023	0.989161	0.808475	0.991009	0.557612	0.000118366	0.00877641	0.29921	0.825591	0.308025	0.0578607	0.565429	0.998349	0.986016	2.12747e-05
chr2R	317	20589006	20752633	0.0641781	0.0333993	0.00428281	0.978951	0.45007	0.967256	0.0871581	0.000504319	0.0110086	0.0806541	0.566781	0.223165	0.0176034	0.120118	0.996674	0.944209	0.000147259
chr2R	318	20752634	20964530	0.0619806	0.0220496	0.00247641	0.936783	0.386789	0.965032	0.0464394	0.0026864	0.0129308	0.0479743	0.54631	0.203014	0.0136994	0.0844228	0.989304	0.939423	0.00143052
chr2R	319	20964531	21146707	0.0575091	0.0231216	0.00321695	0.838834	0.350845	0.959606	0.0432455	0.013009	0.0130369	0.0470974	0.489746	0.200985	0.0172077	0.0841523	0.970558	0.938001	0.00804157

## Sheet: 3L
chr	window	start	stop	CK2	CO13N	CO9N	RC5	RG13N	RG37N	RG39	RG6N	RG8	SP173	SP188	SP221	SP235	SP241	SP80	CO10b.3	CO16.3	CO8b.3	ED19.1.3	EZ63.1.3	GA187	GU11.3	GU3.3	KN73.1.3	KO10.1.3	KO2.1.3	KO6.1.3	KR54.1.3	KR68.1.3	UG17.3	UG40.3	ZK131
chr3L	0	0	316774	0.964408	0.337497	0.991064	0.980492	0.137481	0.395072	0.49933	0.00601258	0.0098306	0.52858	0.875609	0.366379	0.024618	0.982928	0.0228868	0.0205723	0.00698862	0.00294442	0.00828138	0.00631997	0.00525401	0.0100536	0.035085	0.00266599	0.995949	0.0167814	0.991047	0.996156	0.0437434	0.921466	0.993351	0.00387189
chr3L	1	316775	413897	0.967312	0.314384	0.993349	0.983163	0.137938	0.372062	0.506668	0.00236137	0.00429323	0.526283	0.877711	0.355643	0.0245737	0.989084	0.0182204	0.0158476	0.00491477	0.00145997	0.00324696	0.00487529	0.0024843	0.00191729	0.0290611	0.00102893	0.998641	0.0119612	0.996831	0.998573	0.0412713	0.975589	0.996644	0.0024226
chr3L	2	413898	466399	0.96571	0.213547	0.99312	0.982174	0.125353	0.301301	0.498102	0.00134681	0.0027636	0.505816	0.877779	0.306363	0.0204235	0.993958	0.0181502	0.0118456	0.00568139	0.000378667	0.00167943	0.00516004	0.000546398	0.000655424	0.00553747	0.00036265	0.999455	0.00878847	0.998869	0.999404	0.0394286	0.991372	0.998581	0.00141557
chr3L	3	466400	515071	0.972275	0.176352	0.997586	0.982948	0.108562	0.209999	0.490806	0.000249272	0.00120754	0.49165	0.875954	0.242638	0.0169306	0.995728	0.0163046	0.00924949	0.005845	0.000139795	0.00112287	0.00366781	0.000230097	0.000417197	0.000946266	8.25689e-05	0.999579	0.00972074	0.999431	0.999734	0.0378228	0.996011	0.999494	0.000787453
chr3L	4	515072	582877	0.973648	0.161157	0.999188	0.986902	0.0354211	0.127983	0.48464	6.03479e-05	0.000365702	0.480748	0.864131	0.184056	0.0168682	0.996263	0.00542552	0.00339227	0.00500168	0.00021479	0.000295024	0.00423584	0.000370099	0.000103107	0.000186588	3.98673e-05	0.999487	0.0190628	0.999602	0.99985	0.0425745	0.998882	0.99982	0.00108649
chr3L	5	582878	642655	0.986422	0.164048	0.99965	0.992276	0.0138538	0.0637648	0.457566	3.6626e-05	0.000118464	0.430483	0.854409	0.138811	0.0193093	0.995595	0.0036505	0.00261924	0.0029306	0.000901252	9.62092e-05	0.00422005	0.000105081	3.78674e-05	8.45951e-05	5.26045e-05	0.998954	0.0207969	0.99956	0.999891	0.0411451	0.999599	0.999886	0.000387392
chr3L	6	642656	699622	0.98917	0.160425	0.999798	0.993405	0.00584428	0.0532121	0.352332	3.24966e-05	0.000135635	0.422723	0.859631	0.0975123	0.0265031	0.995283	0.0020441	0.0035277	0.00149414	0.000599189	4.05064e-05	0.00761379	9.36078e-05	3.81807e-05	3.35746e-05	0.000101672	0.99655	0.0229559	0.999199	0.999895	0.0333951	0.999745	0.999911	9.54701e-05
chr3L	7	699623	749088	0.98873	0.17389	0.999808	0.992924	0.00482418	0.0537624	0.144929	6.84268e-05	0.00017594	0.43643	0.857316	0.0285756	0.0683653	0.998277	0.00229858	0.00450536	0.00173492	0.00115444	4.06243e-05	0.0143041	0.000132074	0.000105474	3.14082e-05	0.000445499	0.995688	0.0246691	0.998108	0.999831	0.0342085	0.999858	0.999907	5.76117e-05
chr3L	8	749089	816663	0.984595	0.25792	0.999738	0.989882	0.00549209	0.0680485	0.108403	7.45055e-05	6.05531e-05	0.466903	0.839022	0.0179517	0.15377	0.999413	0.00087073	0.00339333	0.000304294	0.00056799	0.000101311	0.0152822	6.22442e-05	0.00011366	6.82202e-05	0.00081323	0.991582	0.0329999	0.99673	0.999695	0.0329509	0.999878	0.99994	0.00011564
chr3L	9	816664	852553	0.981444	0.73279	0.999704	0.98829	0.00770978	0.160033	0.101104	0.000274348	3.64009e-05	0.652613	0.839124	0.0169569	0.65343	0.999678	0.000824913	0.00195747	8.77764e-05	0.000705722	0.000177868	0.0208683	0.000125324	0.000395963	0.000152501	0.0035221	0.97629	0.0879856	0.991214	0.999052	0.0403066	0.999911	0.999939	0.000319189
chr3L	10	852554	902480	0.97995	0.858099	0.99934	0.982768	0.00690525	0.185434	0.0657128	0.000334287	5.17938e-05	0.709185	0.82975	0.0103933	0.822213	0.999726	0.00208632	0.00150291	4.59602e-05	0.00180661	0.000763879	0.0548784	0.000277949	0.000558408	7.84698e-05	0.00686354	0.970697	0.440284	0.974636	0.997151	0.0558207	0.999889	0.999918	0.000806912
chr3L	11	902481	956965	0.984783	0.890933	0.99855	0.967631	0.00977683	0.228867	0.0519461	0.00123965	0.000190133	0.725481	0.784958	0.010018	0.863442	0.999693	0.00342967	0.000265448	7.39041e-05	0.00154334	0.00226791	0.0647483	0.000373947	0.00064446	4.77145e-05	0.0136901	0.972589	0.54827	0.950719	0.993	0.0594465	0.999751	0.999839	0.00117777
chr3L	12	956966	1005709	0.985526	0.940787	0.996975	0.955225	0.0150048	0.262312	0.0484093	0.00134998	0.00101013	0.737635	0.776424	0.0112432	0.90892	0.999677	0.00540081	7.28689e-05	0.000296194	0.000810848	0.00194199	0.0653272	0.000865033	0.000378586	0.000111829	0.0186411	0.969613	0.588023	0.920052	0.987556	0.0600194	0.999522	0.9999	0.000425842
chr3L	13	1005710	1058795	0.982682	0.955099	0.992725	0.955236	0.0258055	0.31312	0.0462772	0.00359295	0.00627065	0.764831	0.783383	0.0150154	0.971026	0.999715	0.0186513	5.22911e-05	0.000917041	0.000810527	0.00111175	0.0593639	0.000636296	0.000397819	0.000130096	0.019282	0.973923	0.611376	0.851886	0.972138	0.054747	0.998667	0.99989	0.00048478
chr3L	14	1058796	1109888	0.970515	0.958995	0.981365	0.950297	0.0274687	0.326557	0.0387183	0.00546648	0.0075678	0.790203	0.780306	0.0162399	0.988537	0.99985	0.0211299	3.98066e-05	0.00127933	0.00015628	0.0014647	0.0611205	0.000307363	0.000251277	0.000147296	0.0163704	0.973709	0.65878	0.635471	0.928564	0.0304671	0.99951	0.999904	0.000444864
chr3L	15	1109889	1175948	0.920941	0.979171	0.956199	0.947891	0.043639	0.343009	0.0399509	0.00826078	0.00647247	0.821036	0.778089	0.0274465	0.996462	0.999893	0.023156	5.56139e-05	0.000352891	4.55197e-05	0.000440642	0.0552976	7.84523e-05	0.000318393	0.000129263	0.00466231	0.971166	0.669652	0.209714	0.812286	0.0100215	0.999808	0.999922	0.000169284
chr3L	16	1175949	1237555	0.903069	0.983644	0.885596	0.954054	0.124826	0.367654	0.0464101	0.00768945	0.00770978	0.931385	0.782135	0.0947516	0.998498	0.999905	0.0214731	8.69845e-05	0.000217504	3.25272e-05	0.000397641	0.056954	6.61339e-05	0.000266684	0.000244169	0.00268574	0.96229	0.66779	0.112894	0.433606	0.00544957	0.999902	0.99994	0.000188447
chr3L	17	1237556	1279095	0.833879	0.98452	0.685034	0.95462	0.154686	0.373667	0.0467777	0.0026286	0.00608875	0.970215	0.775254	0.113228	0.999049	0.999901	0.0131509	8.0157e-05	0.000110505	5.16127e-05	0.000319183	0.059647	7.04382e-05	9.32431e-05	0.000220029	0.00131117	0.932533	0.680022	0.0245841	0.0981642	0.00115625	0.99994	0.99993	0.000151043
chr3L	18	1279096	1327063	0.823222	0.983469	0.611148	0.966964	0.160549	0.36542	0.0406113	0.00193521	0.00606204	0.979285	0.758951	0.126693	0.999045	0.999816	0.0126667	0.000104101	0.000230128	0.000134115	0.000819249	0.0846656	4.65735e-05	0.000137902	0.000671258	0.00151311	0.835151	0.699864	0.00686024	0.0387393	0.000298897	0.999936	0.99988	0.000435502
chr3L	19	1327064	1368435	0.811754	0.977806	0.562356	0.970592	0.15622	0.336498	0.0133389	0.000663724	0.00341444	0.982088	0.70806	0.128564	0.998568	0.999609	0.0112892	0.000199122	0.000776303	0.000691078	0.00396024	0.114495	0.000111627	0.000535727	0.00136249	0.00404438	0.816952	0.701172	0.00381185	0.0297458	0.00023344	0.999904	0.999787	0.000224439
chr3L	20	1368436	1411130	0.791603	0.957978	0.480934	0.969287	0.152689	0.323464	0.00883527	0.000578518	0.00277222	0.985727	0.694364	0.128346	0.99844	0.999085	0.00997183	0.00094933	0.000262429	0.000415023	0.00555777	0.120946	0.00028971	0.00018903	0.00178516	0.0108442	0.744599	0.697805	0.00171695	0.0113145	0.000603513	0.999821	0.999726	6.39334e-05
chr3L	21	1411131	1452272	0.746237	0.878479	0.239005	0.976459	0.150385	0.315523	0.00496937	0.000337385	0.00229563	0.988553	0.701067	0.126243	0.998598	0.998945	0.00869103	0.000569393	0.000145167	0.000809134	0.00474902	0.119455	0.00153693	0.00022328	0.000725122	0.0321193	0.608825	0.681486	0.000976458	0.00222968	0.000146255	0.999854	0.999785	6.04396e-05
chr3L	22	1452273	1502500	0.597515	0.865222	0.201073	0.982047	0.148645	0.304112	0.0015012	7.64596e-05	0.00131034	0.992006	0.715098	0.124702	0.999111	0.999403	0.0077249	0.000367613	7.16298e-05	0.000334661	0.000916043	0.107965	0.00134551	8.22064e-05	0.000420815	0.0364803	0.587033	0.635191	0.000230249	0.000458043	6.10399e-05	0.999881	0.999866	5.66732e-05
chr3L	23	1502501	1557286	0.150807	0.808823	0.0398366	0.986255	0.13442	0.311416	0.000718655	3.36961e-05	0.00117292	0.992288	0.715491	0.112767	0.999606	0.999317	0.00142095	0.00014294	0.000154927	0.000145773	0.000245413	0.059365	0.000299966	8.39189e-05	0.000312684	0.0652788	0.57349	0.487045	9.52447e-05	0.000158358	5.91159e-05	0.999797	0.999912	5.31321e-05
chr3L	24	1557287	1596094	0.0238733	0.793117	0.0142584	0.986309	0.123707	0.364863	0.00059156	2.72053e-05	0.00237397	0.989858	0.713365	0.0996932	0.999743	0.998464	0.000439636	4.79079e-05	7.92726e-05	7.50024e-05	9.73202e-05	0.0270143	0.000155417	7.22269e-05	0.000266177	0.0730366	0.580092	0.46462	0.00011589	6.13972e-05	0.000173498	0.999896	0.999942	3.68678e-05
chr3L	25	1596095	1641716	0.00404912	0.776257	0.00827503	0.982241	0.127135	0.445585	0.0012169	3.25748e-05	0.00193405	0.990905	0.712974	0.0962913	0.999659	0.999421	0.000159024	3.86442e-05	0.00012795	0.000154968	7.41042e-05	0.0218353	8.57411e-05	0.000235829	0.000243691	0.0721327	0.610801	0.40236	0.000293782	9.78812e-05	0.000506159	0.999932	0.999952	5.62275e-05
chr3L	26	1641717	1682253	0.000713687	0.708323	0.00163155	0.96818	0.120603	0.465902	0.000583403	7.23537e-05	0.000969984	0.989483	0.700236	0.0780364	0.999177	0.999795	0.000215071	7.12429e-05	6.71783e-05	0.000311641	0.000230674	0.0220106	8.56161e-05	0.000253343	8.40403e-05	0.0597383	0.650997	0.394119	0.000306558	3.67214e-05	0.000804577	0.999933	0.999948	5.37635e-05
chr3L	27	1682254	1720935	0.000196472	0.698506	0.000468026	0.95918	0.120316	0.494228	0.000791122	7.39699e-05	0.000478998	0.988484	0.694426	0.0681342	0.999097	0.999865	0.000189859	0.000282764	4.65178e-05	0.000420534	0.000161585	0.0166104	0.000286487	0.000125138	3.6676e-05	0.0106805	0.789051	0.363149	0.000866783	3.39749e-05	0.0030885	0.999899	0.999949	7.92363e-05
chr3L	28	1720936	1795539	8.19806e-05	0.676621	0.000300112	0.941132	0.121048	0.500351	0.00234354	3.89127e-05	0.000107048	0.990309	0.685314	0.0669868	0.999046	0.999894	4.99232e-05	0.00011628	6.7484e-05	0.000206702	7.26002e-05	0.0052755	0.000108482	0.000163148	4.53988e-05	0.00243423	0.829666	0.246826	0.00233588	6.68742e-05	0.00603702	0.999723	0.99995	8.76089e-05
chr3L	29	1795540	1843861	9.63342e-05	0.581066	0.000554877	0.881695	0.1106	0.494391	0.00198747	2.66921e-05	5.24163e-05	0.989863	0.650893	0.0570032	0.998412	0.999899	2.94024e-05	8.20351e-05	3.03626e-05	0.00037024	3.86999e-05	0.00310014	5.87083e-05	5.02357e-05	3.2874e-05	0.000555755	0.939923	0.227697	0.00442856	6.65068e-05	0.00972631	0.999812	0.999949	5.8296e-05
chr3L	30	1843862	1887105	0.000112543	0.175138	0.000113145	0.764754	0.0716923	0.469202	0.000583104	3.07432e-05	5.667e-05	0.985586	0.519014	0.0139455	0.996012	0.9999	2.50826e-05	0.0001299	2.85367e-05	0.00118582	5.58249e-05	0.00334733	0.00013198	3.36385e-05	2.77628e-05	0.000120594	0.970573	0.226626	0.0173438	3.2483e-05	0.0327794	0.99982	0.999931	3.42006e-05
chr3L	31	1887106	1928497	7.24629e-05	0.0786802	5.39816e-05	0.321612	0.0620424	0.461284	0.000457373	6.91082e-05	7.72821e-05	0.982463	0.463167	0.00661416	0.986316	0.999876	3.0211e-05	6.85105e-05	5.12859e-05	0.000733576	0.00015497	0.00132848	4.26963e-05	2.71284e-05	3.44071e-05	4.35447e-05	0.98199	0.207975	0.0576553	3.86343e-05	0.038946	0.999695	0.999926	4.30881e-05
chr3L	32	1928498	1970057	0.000184467	0.0569374	0.000104593	0.15685	0.0596642	0.469659	0.00105233	7.7706e-05	6.43202e-05	0.982592	0.457079	0.00573995	0.985654	0.999806	5.40782e-05	0.000142209	0.000177652	0.000208326	0.000495917	0.00128285	2.96005e-05	2.68433e-05	7.0441e-05	4.90032e-05	0.984327	0.163514	0.105688	0.00011191	0.0395864	0.999837	0.999907	0.000112777
chr3L	33	1970058	2012060	0.000525397	0.0538129	0.000498878	0.117911	0.0633551	0.497799	0.00138748	6.56589e-05	0.00014628	0.987211	0.458097	0.00788868	0.983815	0.999531	0.000202277	0.00048002	0.000983603	0.000204404	0.00272761	0.0029743	3.28517e-05	2.70044e-05	6.571e-05	0.000133837	0.991159	0.155988	0.20378	0.000107808	0.0333303	0.999841	0.999795	6.73335e-05
chr3L	34	2012061	2057704	0.00139268	0.0596069	0.00147333	0.0844268	0.0941201	0.670076	0.00158233	0.000176823	0.000251754	0.988489	0.460975	0.0102774	0.984658	0.999542	0.000312997	0.000162487	0.000612679	0.00011674	0.00332918	0.0116088	4.33129e-05	4.54356e-05	5.38865e-05	0.000111627	0.994966	0.138816	0.253313	8.43075e-05	0.0349446	0.999757	0.999808	0.00017463
chr3L	35	2057705	2119648	0.00681449	0.100756	0.00241016	0.0544026	0.105018	0.859492	0.00177538	8.53607e-05	0.000187995	0.990324	0.476305	0.0234238	0.98194	0.999591	0.000939695	0.000149932	0.000584252	9.3468e-05	0.00189802	0.0140922	0.000145174	4.28953e-05	0.000162392	7.44372e-05	0.997779	0.120153	0.544724	0.000125206	0.0371149	0.999297	0.999795	0.00010545
chr3L	36	2119649	2162864	0.0374177	0.111371	0.0086013	0.0501436	0.105307	0.911247	0.00212538	5.02507e-05	8.87827e-05	0.989887	0.473866	0.0261712	0.972797	0.999318	0.000576325	0.00051454	0.00082983	0.000278558	0.0022149	0.0320224	0.000549805	2.79144e-05	0.000316529	8.57158e-05	0.999251	0.120249	0.764132	0.000183195	0.0562062	0.999601	0.999788	3.97048e-05
chr3L	37	2162865	2198288	0.216354	0.133282	0.0130073	0.0545389	0.124075	0.942421	0.00380136	9.09258e-05	8.92409e-05	0.995187	0.497814	0.0313947	0.972988	0.998232	0.00012255	0.000181612	0.00258828	0.000163222	0.00150536	0.0362186	0.000138453	2.78535e-05	0.00124899	0.000245299	0.999728	0.127866	0.916868	7.91322e-05	0.0770489	0.999785	0.999905	2.97981e-05
chr3L	38	2198289	2246266	0.700066	0.227134	0.040145	0.0852475	0.236028	0.97164	0.0125703	4.04057e-05	5.3926e-05	0.996615	0.602583	0.0511139	0.975833	0.998726	6.89571e-05	0.000131303	0.00401138	0.000120905	0.000511465	0.0664566	9.72077e-05	4.00709e-05	0.00126557	0.00124765	0.999814	0.16462	0.968467	0.000131907	0.202281	0.999815	0.999923	4.86373e-05
chr3L	39	2246267	2290584	0.885955	0.255327	0.0486763	0.265647	0.265906	0.978719	0.0166688	4.44908e-05	3.17265e-05	0.99633	0.63052	0.0547121	0.974171	0.998353	0.000166785	0.000388963	0.0131021	0.000223795	0.000523763	0.221985	0.000265806	0.000110297	0.00314315	0.00385453	0.999872	0.17745	0.987705	0.000151507	0.248606	0.999905	0.999941	0.000180809
chr3L	40	2290585	2328031	0.948692	0.268603	0.0512972	0.307712	0.274419	0.980548	0.0163629	6.31458e-05	3.39752e-05	0.994511	0.637838	0.0530921	0.967382	0.996972	0.000792587	0.00102069	0.0253097	0.000342933	0.000604149	0.769419	0.000618775	0.000170104	0.00585959	0.00815261	0.999787	0.264544	0.992619	0.00011281	0.258793	0.999919	0.99992	0.000328913
chr3L	41	2328032	2361946	0.985052	0.267693	0.0561017	0.361104	0.273085	0.979335	0.0162528	7.11324e-05	4.22444e-05	0.994144	0.692487	0.0625117	0.955901	0.997084	0.00131248	0.000521582	0.0276407	0.00016325	0.000569452	0.929172	0.000616624	0.000134414	0.00553398	0.00837767	0.999831	0.294581	0.996543	0.000207247	0.265776	0.999928	0.999898	0.000390238
chr3L	42	2361947	2401987	0.995664	0.258038	0.0551015	0.421427	0.26461	0.97562	0.0112015	0.000105075	0.000114975	0.992949	0.715743	0.065396	0.929309	0.996698	0.000681521	0.000484376	0.0287208	0.00014356	0.000758948	0.976505	0.000500826	0.000373987	0.00562501	0.00779848	0.999889	0.304133	0.998249	0.000187924	0.262799	0.999905	0.999913	0.000320738
chr3L	43	2401988	2443217	0.998261	0.265618	0.0547518	0.57455	0.270091	0.978236	0.00951038	0.00015138	0.000182146	0.992298	0.732839	0.0923482	0.926738	0.997755	0.000742562	0.00131768	0.025576	0.000308676	0.0020326	0.989358	0.001136	0.000767305	0.0079495	0.00887354	0.999907	0.371542	0.998981	0.000230558	0.279607	0.999812	0.99994	0.000116567
chr3L	44	2443218	2492258	0.999229	0.325842	0.0632602	0.74274	0.278247	0.980112	0.0081577	5.26738e-05	0.000249199	0.992173	0.835558	0.123665	0.924874	0.999259	0.000654319	0.000843806	0.0194139	0.00151961	0.00201382	0.993882	0.00515987	0.000254635	0.00774505	0.00838799	0.999864	0.393029	0.998919	0.000721149	0.285093	0.999383	0.999946	0.000179858
chr3L	45	2492259	2534510	0.999363	0.38188	0.0874831	0.844113	0.283146	0.978162	0.00699829	5.77424e-05	0.000351756	0.989218	0.87002	0.132151	0.909752	0.999592	0.000902498	0.00142088	0.0199136	0.005727	0.00384516	0.994681	0.0228315	0.000304578	0.0119718	0.00369517	0.999721	0.537162	0.9982	0.00179834	0.332337	0.999116	0.999936	0.000487049
chr3L	46	2534511	2573551	0.999565	0.448959	0.153067	0.87064	0.290809	0.982989	0.00873193	0.000145487	0.000653916	0.990372	0.896767	0.129996	0.903301	0.99954	0.000903658	0.00221157	0.0276662	0.0068535	0.0153681	0.995271	0.0391037	0.000612522	0.0120765	0.00276	0.999695	0.820659	0.997395	0.00749343	0.368749	0.998417	0.999931	0.000135251
chr3L	47	2573552	2615315	0.999815	0.849627	0.242138	0.900588	0.295591	0.98675	0.011457	5.42781e-05	0.000855145	0.991986	0.92637	0.12769	0.894586	0.999802	0.000810206	0.00248984	0.0778623	0.00530333	0.023795	0.994687	0.123114	0.000204788	0.0182539	0.00070395	0.999783	0.897807	0.996403	0.0407003	0.389215	0.999397	0.999867	4.91058e-05
chr3L	48	2615316	2663256	0.999886	0.951282	0.286747	0.910029	0.28689	0.987284	0.0107677	7.74959e-05	0.000810984	0.991154	0.933134	0.123079	0.867662	0.999794	0.00168583	0.00582059	0.115427	0.00339265	0.0404667	0.997776	0.476551	0.000255778	0.0551565	0.000325119	0.999741	0.917855	0.997362	0.10837	0.392156	0.999731	0.999856	6.23063e-05
chr3L	49	2663257	2707749	0.99986	0.980926	0.308221	0.910922	0.257359	0.985388	0.00644175	0.00027758	0.000799958	0.987456	0.933434	0.104633	0.812505	0.999625	0.0028999	0.0255858	0.189409	0.00384325	0.140239	0.998756	0.689584	0.000992579	0.217387	0.000351636	0.999736	0.932886	0.998947	0.189178	0.407346	0.999835	0.999738	3.57877e-05
chr3L	50	2707750	2756618	0.999771	0.988911	0.31674	0.913848	0.252836	0.976506	0.00633697	0.000735328	0.00064456	0.975221	0.924892	0.0540278	0.602946	0.99942	0.0102821	0.0302583	0.389659	0.00432963	0.183513	0.999611	0.850013	0.00210954	0.76702	0.000242262	0.99967	0.937705	0.999277	0.473891	0.477002	0.999841	0.999669	4.69201e-05
chr3L	51	2756619	2809929	0.999808	0.992922	0.32223	0.917556	0.268447	0.945698	0.0059171	0.00109361	0.000340942	0.970937	0.928458	0.0428249	0.568376	0.99929	0.011691	0.0291346	0.48927	0.00277991	0.193462	0.999825	0.89354	0.0017874	0.922193	7.01592e-05	0.999714	0.938821	0.999647	0.695095	0.493862	0.999888	0.999712	0.000145165
chr3L	52	2809930	2863662	0.999891	0.994054	0.325043	0.913837	0.285712	0.940429	0.00138024	0.000562676	0.00062976	0.965125	0.924941	0.0375055	0.429612	0.999221	0.00956845	0.0313762	0.685369	0.0032786	0.191992	0.999838	0.91227	0.00263454	0.961509	7.52791e-05	0.999677	0.935177	0.999836	0.791825	0.529024	0.999921	0.999715	8.4101e-05
chr3L	53	2863663	2905543	0.999871	0.994234	0.322543	0.910288	0.298473	0.93534	0.000651589	0.000818761	0.00208486	0.960964	0.924595	0.0328458	0.306712	0.999096	0.01111	0.0369378	0.754645	0.00791707	0.175139	0.999857	0.915156	0.00886943	0.970995	0.000155328	0.999733	0.921593	0.999861	0.829091	0.538857	0.999901	0.999719	0.000190539
chr3L	54	2905544	2963096	0.999864	0.993278	0.311773	0.908297	0.31268	0.931066	0.000256694	0.00182077	0.00179062	0.959028	0.926073	0.0313585	0.197816	0.998465	0.019296	0.0387497	0.776239	0.00822365	0.140582	0.999809	0.942236	0.0101476	0.972586	7.63231e-05	0.999711	0.890813	0.999798	0.83722	0.588663	0.999923	0.999739	0.000165836
chr3L	55	2963097	3005849	0.999863	0.990346	0.275182	0.904849	0.311047	0.927689	0.000168978	0.00192475	0.00310887	0.960798	0.91988	0.0330604	0.180565	0.997778	0.020613	0.0370529	0.784453	0.00633181	0.0267276	0.999894	0.98338	0.00904353	0.969562	3.1876e-05	0.999807	0.851226	0.999867	0.842173	0.598472	0.999883	0.999855	4.79452e-05
chr3L	56	3005850	3046999	0.999892	0.978596	0.213799	0.912499	0.299297	0.922267	0.00030341	0.00219978	0.00282568	0.959421	0.904076	0.0306117	0.155003	0.997014	0.0188275	0.0358944	0.781963	0.00749192	0.00727041	0.999927	0.994993	0.00172646	0.954768	2.92895e-05	0.999869	0.700512	0.999874	0.836038	0.594399	0.999724	0.999892	3.631e-05
chr3L	57	3047000	3114672	0.999841	0.930929	0.0924823	0.912189	0.247067	0.91231	0.00066355	0.00220472	0.00141722	0.951915	0.851236	0.0195984	0.050642	0.995053	0.00830076	0.0440624	0.774685	0.0108169	0.0041485	0.999936	0.998565	0.000489808	0.954014	5.43373e-05	0.999901	0.538949	0.999839	0.831165	0.6119	0.999018	0.999917	5.85847e-05
chr3L	58	3114673	3195226	0.999606	0.821906	0.063813	0.90667	0.240466	0.91506	0.000165381	0.00045997	0.000678297	0.943976	0.672518	0.0102663	0.0297925	0.989019	0.00681756	0.0922499	0.782574	0.0332922	0.00421035	0.999903	0.999454	0.000398116	0.955946	7.70825e-05	0.999848	0.431721	0.999581	0.832104	0.725194	0.999513	0.999914	0.0001039
chr3L	59	3195227	3264867	0.998981	0.805806	0.0527821	0.882436	0.237794	0.910186	0.000121768	0.000218397	0.000839701	0.940124	0.643208	0.00886294	0.0261574	0.971532	0.0064295	0.255666	0.840155	0.177374	0.00782672	0.999825	0.999647	0.000954234	0.964532	0.000321807	0.999743	0.400769	0.9997	0.822105	0.860774	0.99981	0.999853	0.000435195
chr3L	60	3264868	3301253	0.996847	0.739209	0.0533666	0.798405	0.237696	0.892997	0.00034356	0.000380725	0.00273957	0.927518	0.564134	0.00650309	0.0260804	0.944423	0.00349284	0.293688	0.953852	0.566855	0.0202937	0.999749	0.999854	0.0024507	0.978014	0.000112467	0.999735	0.399832	0.99972	0.801783	0.894942	0.999874	0.999784	0.000339381
chr3L	61	3301254	3353103	0.996128	0.695278	0.0682043	0.732884	0.241091	0.821359	0.000406563	0.000377063	0.00260442	0.928617	0.553771	0.00521535	0.0207026	0.909647	0.00110281	0.301707	0.982677	0.860133	0.0728581	0.999704	0.999887	0.00914555	0.981155	0.000165922	0.99981	0.421785	0.999819	0.726546	0.916591	0.999856	0.999834	0.000112273
chr3L	62	3353104	3404692	0.99797	0.658771	0.145851	0.561922	0.229973	0.718435	0.00138416	0.000271853	0.000698878	0.924458	0.527566	0.00486109	0.00799069	0.855068	0.00073365	0.361359	0.991484	0.939993	0.087921	0.99962	0.999892	0.0271927	0.980144	0.00020774	0.999692	0.483594	0.99972	0.703274	0.920667	0.999689	0.999803	6.7581e-05
chr3L	63	3404693	3450685	0.998169	0.619601	0.163612	0.499038	0.209876	0.701332	0.00207965	0.000110669	0.000360442	0.918378	0.505988	0.00719129	0.00628122	0.681622	0.000832567	0.723331	0.996853	0.962113	0.110819	0.999559	0.999839	0.103182	0.985118	0.000768329	0.999555	0.651618	0.999669	0.702867	0.922193	0.999141	0.999775	0.000157062
chr3L	64	3450686	3500508	0.998113	0.458044	0.281525	0.49098	0.189659	0.686054	0.00563157	0.000181145	0.000512968	0.913277	0.509006	0.00962142	0.00477539	0.525222	0.00104772	0.812768	0.998953	0.982898	0.115241	0.999593	0.999858	0.252441	0.986308	0.000621655	0.999513	0.697999	0.999728	0.699189	0.921907	0.997607	0.999857	0.000710999
chr3L	65	3500509	3540154	0.998749	0.406749	0.421902	0.486015	0.16312	0.665805	0.00898172	8.92184e-05	0.000547131	0.906253	0.509438	0.0121957	0.00354642	0.404448	0.00160367	0.896266	0.999561	0.991972	0.150299	0.999682	0.999817	0.301763	0.989952	0.00136097	0.999428	0.707945	0.999747	0.713588	0.924069	0.998187	0.999839	0.00428686
chr3L	66	3540155	3579956	0.999194	0.363968	0.454622	0.48339	0.14108	0.652636	0.0126708	0.000142077	0.000464091	0.900709	0.520833	0.0152086	0.00315147	0.283634	0.00102223	0.954434	0.999793	0.994896	0.37269	0.99977	0.999744	0.597045	0.991585	0.00595914	0.999425	0.782026	0.99971	0.740977	0.949651	0.998068	0.999861	0.00673261
chr3L	67	3579957	3624508	0.999484	0.35828	0.532792	0.482592	0.12097	0.644746	0.0167676	6.51175e-05	0.000233281	0.893078	0.53516	0.0187552	0.0026673	0.239033	0.000322148	0.987897	0.999851	0.997794	0.431298	0.999806	0.999784	0.677667	0.991036	0.00678925	0.999467	0.802991	0.99967	0.750159	0.96252	0.996998	0.999887	0.00744234
chr3L	68	3624509	3681643	0.999582	0.372889	0.551513	0.485998	0.102974	0.638048	0.0217255	7.79068e-05	0.000232477	0.887908	0.551737	0.0188393	0.0021114	0.194325	0.000184496	0.99638	0.999813	0.998436	0.809024	0.999759	0.999605	0.896383	0.991471	0.00992384	0.999455	0.940284	0.999596	0.752803	0.972217	0.998356	0.99988	0.00616104
chr3L	69	3681644	3728250	0.99966	0.474014	0.650802	0.49299	0.0865243	0.6472	0.0275888	4.35639e-05	6.64051e-05	0.884561	0.643717	0.0177086	0.00285845	0.18857	0.000272846	0.998853	0.9999	0.998254	0.91417	0.999799	0.999509	0.961178	0.989885	0.0311272	0.999493	0.980963	0.999559	0.748866	0.974134	0.999225	0.999832	0.00338935
chr3L	70	3728251	3766587	0.999637	0.747943	0.677102	0.505067	0.0777385	0.672743	0.0383053	7.55125e-05	5.04978e-05	0.883865	0.89306	0.0103731	0.00454867	0.184125	0.000615498	0.999433	0.999908	0.997262	0.941775	0.999823	0.998982	0.985486	0.982242	0.0381042	0.999567	0.991238	0.999596	0.739233	0.990431	0.999639	0.999872	0.00181621
chr3L	71	3766588	3797924	0.999647	0.85064	0.84794	0.524832	0.0720767	0.701022	0.0528578	7.23513e-05	0.000119842	0.890529	0.966945	0.00850593	0.0101151	0.188961	0.00222766	0.99977	0.999878	0.996979	0.983705	0.99991	0.996985	0.991738	0.953109	0.0377664	0.999608	0.995037	0.999577	0.70973	0.995211	0.99971	0.99989	0.00101366
chr3L	72	3797925	3845715	0.999763	0.878434	0.894563	0.549022	0.0675457	0.732296	0.0685696	0.000249829	0.000140177	0.917305	0.986518	0.0103602	0.0166138	0.199424	0.0113975	0.999894	0.999919	0.995795	0.993565	0.99991	0.989619	0.992945	0.876143	0.0317814	0.999749	0.995735	0.999622	0.669755	0.99643	0.999704	0.999902	0.00104195
chr3L	73	3845716	3892152	0.999735	0.93599	0.96509	0.577532	0.0609426	0.756365	0.0844443	0.00100563	4.58021e-05	0.938119	0.992236	0.0113839	0.0229152	0.213544	0.046483	0.999913	0.999904	0.995436	0.996159	0.999872	0.963163	0.991855	0.811942	0.00774281	0.999613	0.996924	0.999663	0.510857	0.998274	0.999877	0.999895	0.00125423
chr3L	74	3892153	3935488	0.9997	0.949842	0.984262	0.582686	0.0570615	0.759781	0.139347	0.00104569	4.70757e-05	0.943543	0.995552	0.0115746	0.0610641	0.260572	0.0547965	0.999851	0.999811	0.993901	0.996526	0.999647	0.892692	0.986956	0.640528	0.00309449	0.999532	0.997031	0.999638	0.0870389	0.999215	0.999901	0.999838	0.00167636
chr3L	75	3935489	3979652	0.999713	0.953846	0.989536	0.581767	0.0485027	0.760168	0.15458	0.000389069	0.000135488	0.943482	0.998244	0.0092449	0.0850865	0.281242	0.0556804	0.999727	0.999721	0.995766	0.998824	0.999783	0.879727	0.985106	0.553535	0.00165573	0.999403	0.999061	0.999548	0.0197207	0.999612	0.999897	0.999747	0.00213679
chr3L	76	3979653	4026595	0.999679	0.985321	0.994621	0.603351	0.0498469	0.785932	0.210565	0.000469139	0.000117663	0.944234	0.998827	0.0106347	0.237672	0.41722	0.0593871	0.999495	0.999738	0.995536	0.999334	0.999735	0.82822	0.988861	0.201038	0.0006165	0.999189	0.999523	0.999416	0.00439906	0.999662	0.999896	0.999725	0.00119764
chr3L	77	4026596	4063669	0.999634	0.99498	0.996322	0.627677	0.0517231	0.816969	0.224291	0.000218506	0.000402659	0.94557	0.998962	0.0209544	0.405261	0.463307	0.0773848	0.999149	0.999623	0.994209	0.999341	0.99949	0.75417	0.990523	0.0706632	0.000665249	0.998625	0.999573	0.999154	0.00202494	0.99958	0.999873	0.999708	0.000346965
chr3L	78	4063670	4101369	0.999586	0.998389	0.997239	0.638421	0.0520053	0.837322	0.222761	0.000365017	0.00132538	0.945	0.999132	0.0282626	0.537667	0.498832	0.0805477	0.998718	0.99918	0.99548	0.998776	0.999415	0.647714	0.991225	0.0477245	0.00171329	0.999351	0.999176	0.998899	0.00102268	0.999575	0.999868	0.999611	0.000283551
chr3L	79	4101370	4146032	0.999592	0.999197	0.997204	0.63831	0.0480289	0.846577	0.223296	0.000210019	0.00341893	0.935935	0.999348	0.0285493	0.577679	0.50959	0.092469	0.998277	0.997841	0.994945	0.997909	0.999193	0.258445	0.98973	0.0449088	0.00316832	0.999703	0.997788	0.997418	0.000515525	0.999634	0.999859	0.999615	0.000366585
chr3L	80	4146033	4184732	0.999698	0.999452	0.995482	0.629651	0.0465564	0.886839	0.229967	0.000447467	0.00341115	0.907386	0.999579	0.0300754	0.585595	0.507982	0.140167	0.997799	0.992302	0.991946	0.995135	0.998025	0.196848	0.985644	0.0415438	0.00475892	0.999822	0.992825	0.996427	0.000594354	0.999749	0.999911	0.999722	0.000687286
chr3L	81	4184733	4231313	0.999754	0.999262	0.99329	0.589137	0.0348223	0.895869	0.223154	0.0001153	0.00231197	0.897571	0.999533	0.0270204	0.580981	0.492954	0.385553	0.996937	0.990717	0.993175	0.994128	0.997556	0.162496	0.987167	0.0423329	0.0133823	0.999904	0.991466	0.997855	0.000597096	0.999623	0.999901	0.999688	0.00158379
chr3L	82	4231314	4287393	0.999892	0.999445	0.994582	0.52505	0.0255156	0.907131	0.217215	0.000101873	0.00116233	0.889109	0.99958	0.0296211	0.590012	0.472828	0.654953	0.993968	0.992471	0.99228	0.989047	0.995748	0.029018	0.986892	0.0559784	0.016126	0.999934	0.986014	0.999079	0.000600203	0.999601	0.999941	0.999768	0.00104291
chr3L	83	4287394	4336696	0.999911	0.99914	0.993981	0.342092	0.0193897	0.909181	0.184835	0.000323607	0.000584447	0.857128	0.99969	0.0270715	0.627471	0.443595	0.791839	0.988137	0.992264	0.991447	0.987801	0.993455	0.00619451	0.98941	0.137322	0.0257264	0.999919	0.986662	0.999635	0.000475697	0.999646	0.999943	0.999849	0.000381998
chr3L	84	4336697	4377369	0.999925	0.998087	0.994228	0.145802	0.0125754	0.902736	0.130471	0.000155128	0.000196888	0.756921	0.99977	0.0141935	0.634402	0.366443	0.832109	0.987168	0.997555	0.995001	0.989649	0.994896	0.00230926	0.995176	0.649663	0.0741915	0.999856	0.993561	0.999816	0.000197131	0.999483	0.999917	0.999856	0.000252357
chr3L	85	4377370	4416129	0.999941	0.998558	0.996681	0.029677	0.00782055	0.89772	0.0860582	5.13048e-05	7.89396e-05	0.673247	0.999877	0.0106008	0.665737	0.356029	0.85613	0.987964	0.999114	0.997164	0.988979	0.995367	0.00193086	0.997013	0.820294	0.0863357	0.999807	0.995099	0.999782	0.000252915	0.998981	0.999885	0.999897	0.000593504
chr3L	86	4416130	4514623	0.999925	0.998436	0.997665	0.00984345	0.00755226	0.905266	0.0699319	3.78065e-05	3.35877e-05	0.608793	0.99986	0.00816804	0.730886	0.366008	0.9394	0.985705	0.999403	0.997604	0.983428	0.996713	0.0010398	0.997691	0.862769	0.0921886	0.999627	0.994718	0.999705	0.000997494	0.997877	0.999705	0.99992	0.000832726
chr3L	87	4514624	4559807	0.999923	0.999437	0.997339	0.00610126	0.00865613	0.915486	0.0201164	8.67064e-05	3.38337e-05	0.523037	0.999855	0.00928483	0.896198	0.415707	0.963981	0.982753	0.999748	0.997978	0.976364	0.997836	0.00102578	0.99828	0.895764	0.0959665	0.999795	0.994149	0.999807	0.0013282	0.998942	0.999872	0.999884	0.000720016
chr3L	88	4559808	4610537	0.999922	0.999755	0.995276	0.00480797	0.00692643	0.917851	0.00831007	9.86508e-05	7.24103e-05	0.255616	0.999854	0.00719512	0.937	0.429494	0.978805	0.97407	0.999899	0.997276	0.95469	0.99781	0.00243973	0.997875	0.90394	0.125766	0.99984	0.997413	0.999832	0.00228327	0.999291	0.999905	0.999836	0.000548316
chr3L	89	4610538	4650528	0.999878	0.999893	0.988082	0.00352662	0.00768251	0.928778	0.00248429	0.000181108	5.83057e-05	0.192256	0.999861	0.00854716	0.946249	0.505798	0.98186	0.964918	0.999919	0.995078	0.918778	0.999134	0.0109237	0.996656	0.905853	0.170727	0.999826	0.999113	0.999846	0.00497932	0.999381	0.999905	0.999847	0.000223156
chr3L	90	4650529	4686574	0.999789	0.999933	0.987943	0.00292177	0.00810757	0.977495	0.00162981	0.000679573	0.000174579	0.183141	0.999784	0.0101205	0.947782	0.711718	0.981362	0.960937	0.999891	0.985885	0.880413	0.999379	0.0208915	0.99374	0.903863	0.323725	0.999689	0.999544	0.999763	0.012318	0.999528	0.999886	0.999779	0.000264306
chr3L	91	4686575	4731135	0.999807	0.999939	0.984577	0.00223361	0.00637881	0.992412	0.000691745	0.00110213	0.000900959	0.145882	0.99945	0.0100195	0.94582	0.859115	0.975815	0.953726	0.999808	0.955925	0.875655	0.999785	0.0841852	0.984503	0.890601	0.401242	0.99962	0.99979	0.999791	0.0150723	0.999222	0.999887	0.999778	0.000159182
chr3L	92	4731136	4775405	0.999794	0.99995	0.981114	0.00154758	0.00785361	0.996149	0.000351067	0.000771775	0.00062856	0.134805	0.999283	0.0134847	0.955057	0.897348	0.971501	0.941395	0.999393	0.952151	0.883365	0.99988	0.101294	0.980196	0.892992	0.742995	0.999634	0.999797	0.999788	0.0338247	0.998185	0.999811	0.999767	4.97384e-05
chr3L	93	4775406	4826750	0.999898	0.999942	0.983419	0.000663835	0.00970114	0.997743	0.000222544	0.000358144	0.000363216	0.125251	0.999724	0.0232779	0.960303	0.918322	0.97217	0.896067	0.997728	0.938966	0.936492	0.999895	0.127277	0.964532	0.886246	0.870403	0.999711	0.999905	0.999902	0.037738	0.996203	0.999813	0.999882	4.76169e-05
chr3L	94	4826751	4881103	0.999909	0.999923	0.986593	0.000347733	0.0101832	0.998193	0.000540692	0.000541107	0.000407604	0.13009	0.999819	0.0254699	0.964045	0.923802	0.974529	0.866253	0.996134	0.939269	0.952592	0.999801	0.281095	0.960918	0.893356	0.947254	0.999752	0.999902	0.9999	0.0635635	0.99715	0.999876	0.999866	0.000143975
chr3L	95	4881104	4935013	0.999831	0.99982	0.996403	0.000451924	0.0108415	0.997534	0.00163633	0.000605139	0.000552157	0.125084	0.999818	0.0281848	0.962719	0.926906	0.985798	0.863198	0.996216	0.947567	0.955762	0.999691	0.464893	0.965457	0.945965	0.968857	0.999592	0.999933	0.999821	0.177514	0.997644	0.999831	0.999783	8.08167e-05
chr3L	96	4935014	4984194	0.99981	0.999405	0.999081	0.00032218	0.00868162	0.995843	0.00132717	0.00113646	0.000155458	0.10765	0.999867	0.0268875	0.955644	0.928218	0.98941	0.859756	0.998593	0.95365	0.967033	0.999576	0.508123	0.964254	0.977728	0.983672	0.999159	0.999936	0.999796	0.219883	0.997797	0.99968	0.999813	0.000182867
chr3L	97	4984195	5052521	0.999796	0.998538	0.999713	0.000339815	0.00715026	0.99698	0.000814481	0.00163782	9.65955e-05	0.0941407	0.999859	0.0262365	0.949628	0.925215	0.996083	0.838419	0.999401	0.971976	0.969427	0.999112	0.529255	0.972254	0.989622	0.990099	0.998447	0.999887	0.999766	0.251453	0.99734	0.999399	0.999821	0.000145863
chr3L	98	5052522	5101108	0.999775	0.996659	0.999856	0.00025181	0.00890969	0.996585	0.00122635	0.000610145	0.000144151	0.0904214	0.999782	0.0265855	0.945816	0.932491	0.997762	0.839001	0.999515	0.977811	0.969067	0.997761	0.554935	0.984808	0.992236	0.994543	0.997527	0.999728	0.999765	0.332257	0.994885	0.999664	0.999766	0.000456743
chr3L	99	5101109	5151504	0.999881	0.988608	0.999886	0.000188883	0.00772315	0.994576	0.00164631	0.000172905	0.000205231	0.0860407	0.999725	0.0281402	0.928946	0.936189	0.9979	0.86207	0.999708	0.978344	0.963503	0.993913	0.55732	0.98843	0.992242	0.998083	0.996322	0.999146	0.99985	0.352508	0.991559	0.999837	0.999796	0.000263628
chr3L	100	5151505	5205835	0.999881	0.957713	0.999879	0.000391619	0.00501312	0.986556	0.000510774	0.000152993	0.000278095	0.0633688	0.999472	0.0252564	0.856336	0.934955	0.997212	0.952613	0.999747	0.989219	0.966095	0.990936	0.564265	0.996575	0.997504	0.998997	0.997917	0.998098	0.999812	0.375572	0.992537	0.999911	0.999794	0.000541354
chr3L	101	5205836	5250984	0.999857	0.939738	0.999726	0.000467954	0.00262313	0.979514	0.000428447	0.000168874	0.000250906	0.0548252	0.998414	0.0225732	0.845398	0.926459	0.993842	0.977781	0.999766	0.993212	0.968566	0.988732	0.558278	0.998992	0.999163	0.999201	0.998629	0.99797	0.999825	0.380566	0.991814	0.999913	0.999759	0.00189066
chr3L	102	5250985	5305176	0.999863	0.938651	0.999071	0.000383651	0.00175393	0.970531	0.000190634	0.000120494	9.21702e-05	0.0433309	0.997211	0.0215519	0.837209	0.923603	0.983789	0.985761	0.999824	0.993941	0.97093	0.987809	0.542378	0.999587	0.999685	0.999363	0.999054	0.996213	0.999818	0.382552	0.98929	0.999909	0.999813	0.00152751
chr3L	103	5305177	5349126	0.999806	0.927215	0.996397	0.000131974	0.00224341	0.970357	0.000178031	0.000188988	0.000126717	0.0381092	0.99637	0.0148136	0.833101	0.929868	0.945144	0.987536	0.999818	0.992665	0.972381	0.987495	0.536425	0.999698	0.999784	0.999356	0.999296	0.996184	0.999707	0.397224	0.982004	0.999891	0.999788	0.00112156
chr3L	104	5349127	5392060	0.99985	0.928638	0.988966	0.000186493	0.00272087	0.973634	0.000289256	0.000592206	9.0414e-05	0.0339344	0.993057	0.0136835	0.834396	0.929208	0.812716	0.987485	0.999903	0.989789	0.969196	0.982655	0.502511	0.999524	0.999646	0.999113	0.99959	0.994102	0.99918	0.500436	0.971695	0.999898	0.999856	0.000655979
chr3L	105	5392061	5433407	0.999817	0.922502	0.958668	0.000557846	0.00503963	0.972456	0.000386787	0.00181718	0.000108242	0.0209114	0.984126	0.00748816	0.841707	0.918181	0.670815	0.983958	0.999891	0.980671	0.956451	0.978909	0.389935	0.999423	0.999602	0.99833	0.999598	0.985417	0.998807	0.655944	0.934753	0.999815	0.999883	0.000504449
chr3L	106	5433408	5485346	0.999674	0.923989	0.843908	0.000725345	0.0134248	0.979171	0.000317905	0.00144039	0.00021236	0.0099441	0.95032	0.00711279	0.850636	0.89201	0.629461	0.97163	0.999816	0.94396	0.926991	0.981537	0.202948	0.998703	0.999094	0.996014	0.999589	0.98139	0.999364	0.749607	0.779476	0.999449	0.99984	0.000616571
chr3L	107	5485347	5526860	0.999587	0.944644	0.824932	0.000551538	0.0196831	0.984414	8.9001e-05	0.000267598	0.000182535	0.00529865	0.942961	0.00674711	0.86465	0.870497	0.594189	0.946849	0.999863	0.83523	0.887939	0.980816	0.107825	0.996534	0.997597	0.986635	0.99968	0.979806	0.999482	0.775084	0.159165	0.999779	0.999819	0.000832706
chr3L	108	5526861	5578820	0.999338	0.95055	0.76412	0.00104618	0.0200257	0.985325	8.16262e-05	6.71032e-05	6.48648e-05	0.00294344	0.909483	0.00844473	0.864904	0.870496	0.585918	0.865953	0.999771	0.690925	0.836113	0.97807	0.0896858	0.988509	0.993089	0.984559	0.999682	0.977435	0.999563	0.909404	0.0492187	0.999883	0.999805	0.000956253
chr3L	109	5578821	5631835	0.999149	0.950977	0.733692	0.000492397	0.0154051	0.984016	0.000252815	3.33774e-05	7.76079e-05	0.0031006	0.805047	0.00702846	0.852925	0.861013	0.546648	0.779333	0.999805	0.667142	0.615751	0.967198	0.0839021	0.975313	0.975913	0.976448	0.999802	0.965826	0.999556	0.968117	0.0179985	0.999931	0.999907	0.000946805
chr3L	110	5631836	5692157	0.998024	0.963284	0.673046	0.000720674	0.0111592	0.986649	0.000640487	3.34363e-05	6.95961e-05	0.00333573	0.784875	0.00584405	0.843345	0.86376	0.377724	0.548238	0.999811	0.567744	0.578705	0.965892	0.0547396	0.922402	0.912855	0.961817	0.999814	0.934582	0.999082	0.988264	0.0132768	0.999933	0.999922	0.000894439
chr3L	111	5692158	5747035	0.998928	0.972553	0.643953	0.000797834	0.00825819	0.988656	0.000971531	6.46142e-05	8.38917e-05	0.00339211	0.777938	0.00484187	0.830541	0.868047	0.291927	0.509158	0.999621	0.545123	0.426611	0.956731	0.0506627	0.914542	0.808367	0.918202	0.999667	0.822154	0.999633	0.993435	0.0118279	0.99991	0.999886	0.00105564
chr3L	112	5747036	5805818	0.999138	0.991465	0.633096	0.000819281	0.00553428	0.991154	0.00118201	3.44253e-05	8.48246e-05	0.00325184	0.773503	0.00394091	0.817871	0.874013	0.260523	0.431358	0.999086	0.499099	0.325644	0.919573	0.0324328	0.91587	0.45563	0.821441	0.998993	0.701703	0.999812	0.994786	0.0146667	0.999934	0.999927	0.000546871
chr3L	113	5805819	5861385	0.999505	0.996591	0.613193	0.000318471	0.00600856	0.991525	0.000702287	3.84712e-05	0.000190292	0.0041504	0.763582	0.00311099	0.812214	0.872124	0.145516	0.42119	0.999137	0.473935	0.309503	0.870312	0.0281705	0.931267	0.221779	0.535087	0.999664	0.601067	0.99986	0.996924	0.017699	0.999938	0.999915	0.000270811
chr3L	114	5861386	5896650	0.999772	0.99804	0.617298	8.37495e-05	0.00664124	0.992277	0.000151639	6.26729e-05	0.000209802	0.00512629	0.753769	0.00208575	0.807699	0.870975	0.0488438	0.402134	0.998576	0.378249	0.246168	0.724291	0.0233208	0.940258	0.166404	0.146357	0.999848	0.585253	0.999924	0.997187	0.0209416	0.999938	0.999917	6.77144e-05
chr3L	115	5896651	5947987	0.999858	0.99845	0.607669	5.86644e-05	0.0122107	0.991723	7.20255e-05	3.63132e-05	0.000196685	0.00924522	0.755345	0.00271951	0.814935	0.856159	0.0327495	0.402378	0.996467	0.275547	0.178098	0.24869	0.00403043	0.942398	0.159262	0.0820299	0.999907	0.58278	0.999934	0.996686	0.0431261	0.999901	0.99994	4.7126e-05
chr3L	116	5947988	5993411	0.999884	0.997816	0.56153	7.15255e-05	0.0126281	0.98758	0.000102631	5.28156e-05	0.000174935	0.00922938	0.745617	0.00193244	0.810884	0.790514	0.0110414	0.401889	0.997185	0.258964	0.16802	0.1675	0.00103178	0.945689	0.16366	0.0717918	0.999929	0.596084	0.999941	0.99907	0.121386	0.999931	0.999943	0.00010054
chr3L	117	5993412	6054486	0.999927	0.998611	0.552711	3.08746e-05	0.0205432	0.987196	0.000109658	0.000180023	0.000183997	0.0101744	0.75055	0.00129105	0.815157	0.765144	0.00735346	0.400665	0.998742	0.259341	0.15376	0.148805	0.000490804	0.942776	0.165613	0.0735534	0.999904	0.672516	0.999936	0.999693	0.615472	0.999945	0.999932	9.00656e-05
chr3L	118	6054487	6108340	0.999924	0.999109	0.554774	2.53998e-05	0.048778	0.992905	9.85368e-05	0.000219703	5.52577e-05	0.0189972	0.742505	0.000912191	0.823691	0.763736	0.00678248	0.42731	0.998992	0.282018	0.15592	0.149415	0.000163897	0.94886	0.195457	0.0851057	0.999882	0.787855	0.999904	0.999842	0.771161	0.999949	0.99992	6.03654e-05
chr3L	119	6108341	6207050	0.999928	0.99944	0.593029	3.32421e-05	0.0576169	0.993971	0.000321336	0.000214752	5.3723e-05	0.0270049	0.748429	0.000688736	0.880298	0.786076	0.00721922	0.459449	0.998613	0.294693	0.167951	0.144743	0.000191357	0.951044	0.212794	0.138131	0.999888	0.937334	0.999819	0.999901	0.824885	0.999949	0.999911	0.000143476
chr3L	120	6207051	6268775	0.999937	0.999363	0.724657	8.68341e-05	0.0575602	0.993436	0.00124515	6.19126e-05	4.03909e-05	0.0283785	0.746802	0.00133922	0.897183	0.934147	0.00769372	0.54221	0.999485	0.383591	0.166702	0.153122	0.000748111	0.964567	0.322477	0.44751	0.999878	0.979529	0.999611	0.999862	0.847957	0.999945	0.999889	0.000293685
chr3L	121	6268776	6326953	0.999927	0.998613	0.761383	0.00023263	0.0488794	0.990609	0.00106268	6.21939e-05	5.70501e-05	0.0276665	0.737023	0.000661984	0.899499	0.973107	0.0138387	0.705302	0.999718	0.840599	0.166666	0.209124	0.00259018	0.972608	0.350602	0.586853	0.999894	0.99359	0.998664	0.999753	0.8558	0.999942	0.999851	0.000269859
chr3L	122	6326954	6385769	0.999885	0.995956	0.768124	0.000201089	0.0171295	0.980884	0.00103066	7.24594e-05	0.000215958	0.0239227	0.692508	0.000455479	0.895093	0.985576	0.0148475	0.900376	0.999886	0.956924	0.153928	0.25102	0.00260998	0.989809	0.532327	0.657463	0.99988	0.997747	0.997564	0.999603	0.89104	0.99993	0.99986	0.000103896
chr3L	123	6385770	6467893	0.999803	0.987287	0.766026	0.000260839	0.0123012	0.980441	0.00174501	0.000130571	0.000267698	0.0243724	0.670616	0.000941424	0.871408	0.99114	0.025682	0.960112	0.999901	0.988614	0.104672	0.259141	0.00120039	0.994531	0.641768	0.764061	0.999787	0.998948	0.998686	0.999331	0.901462	0.99991	0.999799	0.000154606
chr3L	124	6467894	6515793	0.99983	0.981828	0.773199	0.00018758	0.00834015	0.980696	0.00200996	6.98755e-05	0.000200904	0.0249842	0.655347	0.00129425	0.853486	0.995407	0.0298475	0.981249	0.999921	0.996649	0.0974035	0.259004	0.00133288	0.995399	0.806692	0.799191	0.999824	0.999111	0.999161	0.999067	0.909298	0.999931	0.99984	0.000186481
chr3L	125	6515794	6570971	0.999903	0.977557	0.7686	0.000503199	0.00749507	0.976729	0.00216724	8.03516e-05	0.000515822	0.0307754	0.617948	0.000942702	0.811443	0.99822	0.0289682	0.989188	0.999939	0.998591	0.0951324	0.250507	0.000876511	0.994901	0.857019	0.924583	0.99989	0.998863	0.999137	0.998801	0.914477	0.999946	0.999919	0.000260452
chr3L	126	6570972	6627311	0.999931	0.963337	0.770392	0.000708506	0.00670858	0.973762	0.003241	0.000189463	0.000689924	0.0471314	0.587078	0.000518382	0.77788	0.999214	0.0283182	0.992561	0.999927	0.99946	0.0809156	0.21282	0.00130639	0.991417	0.870312	0.967506	0.999921	0.998612	0.998625	0.997417	0.947613	0.999932	0.999933	0.00086753
chr3L	127	6627312	6689886	0.999929	0.961067	0.779528	0.000843058	0.00954694	0.971936	0.00474312	0.000212701	0.00070606	0.116538	0.586992	0.000794654	0.775938	0.999304	0.0285404	0.992853	0.999875	0.9997	0.0814649	0.194204	0.00057547	0.978353	0.953144	0.983972	0.999935	0.998874	0.999411	0.998422	0.955944	0.99994	0.999937	0.00233422
chr3L	128	6689887	6747188	0.999885	0.965202	0.797943	0.000832238	0.0271672	0.97065	0.00623564	0.000154056	0.00139855	0.168578	0.584079	0.00150589	0.78311	0.998997	0.029178	0.99286	0.999913	0.999869	0.0922256	0.189143	0.000633433	0.931352	0.974883	0.98886	0.9999	0.999484	0.999524	0.999282	0.979935	0.999934	0.999906	0.00514258
chr3L	129	6747189	6799578	0.999849	0.964085	0.799035	0.000768623	0.0309556	0.973108	0.00738217	0.000411741	0.000709098	0.19072	0.583013	0.00613176	0.781532	0.99815	0.0387088	0.990631	0.9999	0.999921	0.120694	0.200637	0.00105925	0.924202	0.979953	0.993581	0.999806	0.999488	0.999595	0.999554	0.988872	0.999926	0.999862	0.00506678
chr3L	130	6799579	6851389	0.999836	0.968538	0.825642	0.000647936	0.0333742	0.977491	0.00632921	0.000546903	0.00091882	0.212736	0.608743	0.0238386	0.78452	0.997767	0.0500399	0.990198	0.99987	0.999937	0.217954	0.218861	0.00139757	0.890759	0.979847	0.997152	0.999744	0.99895	0.999733	0.999761	0.995421	0.999904	0.999773	0.00278112
chr3L	131	6851390	6904021	0.99988	0.975984	0.945141	0.000379964	0.0360584	0.982592	0.00533138	0.000232657	0.00236081	0.238488	0.76448	0.0466008	0.789812	0.999067	0.12324	0.98673	0.999806	0.999927	0.241565	0.219928	0.0025821	0.868913	0.976143	0.998291	0.999582	0.997729	0.999735	0.999738	0.997354	0.999884	0.999521	0.00290878
chr3L	132	6904022	6952427	0.999883	0.985207	0.977666	0.000337701	0.0389925	0.988495	0.00651641	9.35742e-05	0.00270711	0.369723	0.88766	0.0634653	0.838079	0.999553	0.445036	0.975914	0.999483	0.999911	0.24537	0.206238	0.00346191	0.781559	0.960578	0.999292	0.999049	0.992375	0.99982	0.999784	0.998974	0.999818	0.999009	0.000953938
chr3L	133	6952428	6991796	0.999875	0.989651	0.989774	0.000347263	0.038295	0.989678	0.00546655	0.000150913	0.00231356	0.418963	0.949061	0.0672583	0.852901	0.999678	0.529722	0.939171	0.998552	0.999906	0.236896	0.191275	0.00621253	0.609618	0.896787	0.999687	0.997618	0.972809	0.999882	0.999713	0.999547	0.999637	0.99787	0.00019917
chr3L	134	6991797	7030735	0.999817	0.990712	0.995054	0.00106306	0.0446137	0.99612	0.00568863	0.000150445	0.00138358	0.732603	0.970749	0.0970501	0.953409	0.999616	0.817544	0.934006	0.999235	0.999869	0.232677	0.185001	0.0244461	0.576807	0.873645	0.999771	0.998527	0.890636	0.999904	0.999276	0.999713	0.999818	0.998905	0.000107573
chr3L	135	7030736	7071985	0.999807	0.995233	0.996836	0.00166217	0.0460683	0.997739	0.00904267	9.20086e-05	0.00118526	0.886893	0.982295	0.114568	0.979576	0.999636	0.924867	0.910372	0.999398	0.999721	0.208548	0.155467	0.0300367	0.462137	0.799206	0.999805	0.998852	0.874802	0.999935	0.998366	0.999737	0.999907	0.999492	4.08892e-05
chr3L	136	7071986	7116950	0.999802	0.997534	0.997665	0.00215094	0.0532129	0.997756	0.0263838	0.000221137	0.000917584	0.930349	0.990544	0.127291	0.989292	0.999647	0.953226	0.908404	0.999575	0.999155	0.192982	0.148036	0.0605622	0.445312	0.785843	0.999736	0.998697	0.842894	0.999945	0.996307	0.999842	0.999901	0.999696	3.35055e-05
chr3L	137	7116951	7168092	0.999769	0.998075	0.997787	0.0025485	0.0988783	0.996569	0.124369	0.000263726	0.00169294	0.94224	0.99455	0.129186	0.993488	0.999364	0.963564	0.895604	0.99941	0.99701	0.176024	0.121992	0.0678417	0.422148	0.775196	0.999282	0.997806	0.738075	0.999924	0.990982	0.999887	0.999934	0.999822	7.01706e-05
chr3L	138	7168093	7217765	0.999839	0.997493	0.997504	0.00157842	0.115878	0.993178	0.751765	0.000238116	0.00121239	0.944102	0.99594	0.121983	0.994466	0.999121	0.966314	0.890247	0.999534	0.997662	0.146851	0.061387	0.117965	0.424759	0.774195	0.999338	0.999051	0.685078	0.999916	0.991179	0.9999	0.999937	0.999842	5.16581e-05
chr3L	139	7217766	7270447	0.999848	0.999252	0.995867	0.000633149	0.136336	0.990516	0.915342	0.000476181	0.000947959	0.946631	0.997966	0.127592	0.99838	0.998184	0.979298	0.882469	0.999185	0.99718	0.0578583	0.0472497	0.14008	0.412676	0.756602	0.998758	0.999445	0.650266	0.999924	0.990606	0.999897	0.999934	0.999853	3.98214e-05
chr3L	140	7270448	7316330	0.999788	0.99968	0.995953	0.000683543	0.139132	0.978924	0.967934	0.000478415	0.00162135	0.942571	0.998397	0.123342	0.999266	0.996111	0.982792	0.888649	0.998371	0.998692	0.040702	0.0426303	0.146538	0.412339	0.754609	0.996209	0.999335	0.556106	0.999859	0.995125	0.999839	0.999899	0.999766	8.02441e-05
chr3L	141	7316331	7389799	0.999859	0.999815	0.998507	0.00111735	0.171419	0.974468	0.986698	0.000356653	0.00218686	0.939304	0.998556	0.131302	0.999669	0.993581	0.995315	0.895851	0.997942	0.998903	0.0357247	0.0434987	0.150024	0.414549	0.776113	0.990619	0.999124	0.184164	0.9999	0.998564	0.999771	0.999926	0.999805	7.63044e-05
chr3L	142	7389800	7432607	0.999799	0.999722	0.999112	0.000802529	0.179365	0.974166	0.991697	0.000197785	0.00158647	0.922142	0.998275	0.128565	0.999731	0.987398	0.998275	0.904764	0.998843	0.999562	0.0375627	0.044945	0.142859	0.451226	0.917086	0.988902	0.999533	0.0465787	0.999891	0.999347	0.999537	0.999909	0.99974	0.000158198
chr3L	143	7432608	7472436	0.999856	0.999404	0.999121	0.000700517	0.175685	0.968638	0.99307	0.000405385	0.000962843	0.866876	0.997381	0.111781	0.999639	0.967094	0.999151	0.904117	0.999043	0.999656	0.054063	0.049122	0.12356	0.457271	0.950558	0.991955	0.99971	0.018987	0.999872	0.999588	0.99906	0.999885	0.999696	6.47294e-05
chr3L	144	7472437	7521203	0.999914	0.998218	0.998335	0.000354183	0.151998	0.955526	0.992084	0.000486095	0.000274049	0.720693	0.994811	0.0461239	0.999136	0.880903	0.999538	0.914802	0.998722	0.999438	0.056912	0.0478639	0.119479	0.508726	0.957999	0.995566	0.999727	0.0149095	0.99982	0.999577	0.997619	0.999814	0.999482	0.00011185
chr3L	145	7521204	7584628	0.999898	0.998834	0.997417	0.000194957	0.151165	0.915676	0.995454	0.000549475	0.000227666	0.678032	0.988899	0.0217333	0.998029	0.766554	0.999606	0.916148	0.997398	0.998568	0.0531609	0.0405446	0.114688	0.522208	0.959242	0.996501	0.999706	0.00611066	0.999811	0.999388	0.992703	0.999654	0.999017	6.84726e-05
chr3L	146	7584629	7633786	0.999816	0.998551	0.994123	0.000138525	0.140756	0.756204	0.996459	0.00130434	0.000697779	0.505893	0.966443	0.0183616	0.994148	0.433277	0.999654	0.918724	0.99846	0.998292	0.0589009	0.0344285	0.121282	0.585595	0.976871	0.99659	0.999346	0.00175618	0.999804	0.998776	0.992249	0.998923	0.998098	0.00011916
chr3L	147	7633787	7722434	0.999854	0.996953	0.994675	0.000164204	0.132297	0.144545	0.996402	0.00195588	0.00102697	0.438033	0.881759	0.0158257	0.978801	0.335107	0.999767	0.913808	0.998719	0.996965	0.0711767	0.0345145	0.12368	0.601986	0.983324	0.995604	0.998335	0.00111354	0.999897	0.998021	0.992181	0.998553	0.998345	0.000127764
chr3L	148	7722435	7766188	0.999834	0.992643	0.993562	0.000164277	0.106723	0.0490412	0.99418	0.00177023	0.000318965	0.148892	0.562578	0.00527979	0.918492	0.0728338	0.999768	0.914765	0.999275	0.996435	0.0857895	0.0353719	0.150451	0.643142	0.994773	0.995089	0.999142	0.000439476	0.999886	0.999333	0.993405	0.99946	0.998961	9.8857e-05
chr3L	149	7766189	7821786	0.999817	0.974968	0.990361	6.9182e-05	0.0899477	0.0264161	0.992431	0.000447304	0.000330017	0.101143	0.508439	0.00379964	0.865262	0.0201697	0.999724	0.906133	0.999419	0.993281	0.0891277	0.0349754	0.190957	0.650761	0.998101	0.998377	0.999355	0.000240493	0.999929	0.999642	0.996676	0.999732	0.999435	7.42115e-05
chr3L	150	7821787	7864289	0.999772	0.904333	0.983717	8.13828e-05	0.085817	0.0199673	0.986662	0.00026388	0.000601426	0.0810413	0.308164	0.00307318	0.82115	0.0112215	0.999762	0.868195	0.999581	0.984314	0.0843888	0.0269487	0.362516	0.645375	0.999217	0.999147	0.999569	8.24961e-05	0.999929	0.999707	0.998075	0.99978	0.999771	0.000191693
chr3L	151	7864290	7919466	0.999844	0.874577	0.982628	0.000109507	0.0795844	0.0165512	0.965294	7.53049e-05	0.000765569	0.0743035	0.149903	0.00176287	0.787351	0.0032488	0.999805	0.724524	0.99983	0.949785	0.0605422	0.00447781	0.419275	0.619502	0.999592	0.999727	0.999839	0.00010481	0.999939	0.999784	0.99903	0.999785	0.999895	0.000162833
chr3L	152	7919467	7958567	0.999899	0.864544	0.981536	5.75804e-05	0.0745821	0.0170408	0.960964	6.11267e-05	0.000967387	0.0539503	0.0610638	0.000485229	0.763125	0.00193832	0.999848	0.395698	0.99991	0.892616	0.0347495	0.000913896	0.75194	0.521601	0.999701	0.999859	0.999898	0.000138914	0.999921	0.999597	0.99933	0.999843	0.999914	7.04358e-05
chr3L	153	7958568	8007526	0.999935	0.825275	0.985173	5.23752e-05	0.0714551	0.0177432	0.942269	3.38784e-05	0.000183788	0.046298	0.0258935	0.00035989	0.750516	0.00148066	0.99991	0.17719	0.999915	0.664045	0.00687395	0.000386353	0.897307	0.456763	0.999487	0.999914	0.999936	0.000133169	0.9999	0.999291	0.999084	0.999786	0.999944	4.82604e-05
chr3L	154	8007527	8061536	0.999931	0.820706	0.98664	8.02457e-05	0.0727825	0.0244125	0.899249	4.38399e-05	5.63851e-05	0.043947	0.0168486	0.000546353	0.748514	0.00194293	0.999937	0.0659883	0.999934	0.512277	0.00210671	0.000185399	0.96084	0.413983	0.999664	0.999929	0.999932	0.000165213	0.999764	0.99975	0.999696	0.999913	0.999947	0.000104344
chr3L	155	8061537	8118714	0.999946	0.821726	0.987565	0.000310078	0.0753832	0.0685799	0.729352	2.93922e-05	5.8307e-05	0.0425819	0.0157794	0.000570088	0.747967	0.00304201	0.99993	0.024862	0.999922	0.467997	0.00102068	0.000344864	0.983189	0.342386	0.99953	0.999915	0.9999	0.000267641	0.999887	0.999839	0.999841	0.999936	0.999942	6.61448e-05
chr3L	156	8118715	8179700	0.999938	0.843939	0.986403	0.00148056	0.101953	0.327008	0.147111	2.99321e-05	0.000181342	0.0417836	0.0204261	0.00143269	0.76772	0.00502121	0.999884	0.0096551	0.999841	0.463808	0.000433659	0.000935547	0.989944	0.265494	0.999079	0.999842	0.999931	0.00118086	0.999898	0.999765	0.999821	0.999933	0.99992	0.000174987
chr3L	157	8179701	8238695	0.999927	0.846991	0.989889	0.00124106	0.107337	0.409843	0.0439122	5.35536e-05	0.000126006	0.0492695	0.051562	0.00375813	0.769441	0.00447247	0.99989	0.00756037	0.999692	0.470086	0.00058624	0.00201184	0.995123	0.226665	0.998953	0.999821	0.999927	0.00200476	0.999884	0.999525	0.999704	0.999944	0.999917	0.000134681
chr3L	158	8238696	8288248	0.999879	0.874055	0.995607	0.00142339	0.114157	0.60465	0.0269408	0.000199454	0.000369983	0.0608337	0.148887	0.00644801	0.781342	0.00633283	0.999858	0.00899497	0.999248	0.467635	0.000395693	0.00154607	0.9968	0.184846	0.998683	0.999776	0.999884	0.00436261	0.999824	0.998579	0.999152	0.999945	0.999886	0.00019467
chr3L	159	8288249	8345155	0.999846	0.879244	0.997718	0.00154084	0.16156	0.837584	0.0249264	0.000361916	0.000142087	0.0691045	0.648126	0.024065	0.794777	0.0167846	0.999888	0.00917505	0.998319	0.482754	0.000523577	0.00234063	0.997552	0.157253	0.998197	0.999799	0.999866	0.0167291	0.999773	0.996186	0.997641	0.999931	0.999886	0.000798467
chr3L	160	8345156	8408193	0.999839	0.886182	0.998289	0.00238124	0.258539	0.892392	0.0257822	0.000414619	0.000205186	0.120796	0.787058	0.0289491	0.793863	0.0828305	0.999843	0.00902009	0.996502	0.4814	0.000644232	0.00284999	0.997876	0.0448947	0.995761	0.999867	0.999853	0.0257907	0.999743	0.989777	0.993735	0.999933	0.999907	0.004363
chr3L	161	8408194	8469328	0.999854	0.935149	0.99793	0.00359819	0.282427	0.90717	0.0220144	0.000142333	0.000621453	0.135956	0.819741	0.0290114	0.776508	0.100319	0.999858	0.0105986	0.997503	0.474485	0.0010606	0.00655584	0.997642	0.0117262	0.996432	0.999902	0.999631	0.0569201	0.999549	0.989767	0.984832	0.999932	0.99992	0.00490797
chr3L	162	8469329	8535322	0.999799	0.947713	0.996166	0.0105243	0.319048	0.934411	0.00602158	0.000142147	0.00020445	0.155799	0.932144	0.0327914	0.771051	0.131878	0.999815	0.0188288	0.997879	0.480653	0.00160615	0.00979226	0.99588	0.00592189	0.996651	0.999857	0.999684	0.0939917	0.999528	0.994107	0.982979	0.999928	0.999876	0.00891537
chr3L	163	8535323	8577297	0.999855	0.973237	0.990242	0.0124494	0.482219	0.940598	0.00286882	0.000186811	0.000100725	0.274513	0.981293	0.0410032	0.784814	0.147274	0.999823	0.0285312	0.998177	0.473761	0.00577801	0.0135445	0.993641	0.00542917	0.996427	0.999883	0.999356	0.104582	0.999511	0.997398	0.987154	0.999924	0.999862	0.00927059
chr3L	164	8577298	8621547	0.999903	0.980898	0.985528	0.0185264	0.543085	0.976848	0.00239053	5.36203e-05	9.33131e-05	0.507896	0.99375	0.0499646	0.869111	0.241297	0.99991	0.0297029	0.997589	0.449279	0.0119197	0.0268753	0.988364	0.00303966	0.995461	0.999889	0.997898	0.106478	0.999553	0.998863	0.988229	0.999927	0.999901	0.0083585
chr3L	165	8621548	8670075	0.999872	0.988198	0.969728	0.0197142	0.560523	0.989757	0.00135668	4.80471e-05	0.000251867	0.575676	0.996768	0.0498999	0.89463	0.274059	0.999914	0.0432708	0.999289	0.391399	0.0136459	0.0321954	0.974167	0.00184315	0.991222	0.999786	0.997825	0.102865	0.999674	0.999659	0.99585	0.999924	0.999881	0.00334607
chr3L	166	8670076	8717479	0.999856	0.990007	0.968495	0.0192584	0.656609	0.993013	0.00169009	2.70532e-05	0.000237167	0.616185	0.997373	0.06177	0.909756	0.280506	0.999919	0.050979	0.999748	0.177449	0.0138804	0.0317315	0.945329	0.00176439	0.984242	0.999689	0.996227	0.08128	0.999669	0.999828	0.998536	0.999924	0.999847	0.00257146
chr3L	167	8717480	8760971	0.999876	0.989518	0.961076	0.0168945	0.681113	0.993554	0.000687726	2.68655e-05	7.61974e-05	0.629233	0.996705	0.0627324	0.911757	0.276926	0.999899	0.0579056	0.999849	0.114421	0.014404	0.0408291	0.86448	0.0010012	0.982999	0.999446	0.993059	0.0642366	0.999354	0.999892	0.999505	0.999912	0.999836	0.00197179
chr3L	168	8760972	8814870	0.999915	0.993747	0.96269	0.0046337	0.824322	0.99807	0.000738706	4.39234e-05	9.75167e-05	0.678558	0.998975	0.075025	0.919208	0.29541	0.999876	0.0577473	0.999853	0.0824638	0.0106894	0.0889932	0.713018	0.000612326	0.982446	0.998765	0.993123	0.0635907	0.99849	0.999886	0.999801	0.999914	0.999886	0.00136235
chr3L	169	8814871	8858012	0.999887	0.997026	0.96795	0.0028069	0.859875	0.999318	0.00139543	6.77284e-05	9.01736e-05	0.724561	0.999594	0.109228	0.918323	0.296383	0.999735	0.0713686	0.999892	0.0788671	0.0114752	0.392574	0.55066	0.000647207	0.988926	0.999555	0.99692	0.0758466	0.999491	0.999901	0.999843	0.999832	0.999904	0.000836472
chr3L	170	8858013	8903368	0.999849	0.997753	0.98863	0.000994066	0.872534	0.999667	0.00562017	0.000257176	0.000241719	0.90254	0.999744	0.230167	0.932106	0.325454	0.999173	0.0774579	0.999873	0.0638717	0.0102201	0.476833	0.178937	0.000441853	0.990027	0.999825	0.998582	0.0790399	0.999739	0.999841	0.999901	0.999675	0.9999	0.00134161
chr3L	171	8903369	8959248	0.999841	0.997258	0.993818	0.000877261	0.875013	0.999769	0.00934593	0.000864271	0.000247081	0.969922	0.999674	0.263286	0.933713	0.331536	0.998139	0.0812965	0.999773	0.0632616	0.00918135	0.498762	0.0692432	0.000956223	0.991166	0.999854	0.999312	0.106561	0.999805	0.99972	0.999883	0.998982	0.999918	0.00185473
chr3L	172	8959249	9013881	0.999896	0.99536	0.995635	0.00159666	0.870786	0.999648	0.00921721	0.00072933	0.000179704	0.987681	0.99912	0.299342	0.955545	0.382515	0.996342	0.0862212	0.999687	0.0564221	0.0115707	0.570362	0.0369323	0.00277115	0.990317	0.999845	0.999562	0.193173	0.999832	0.99946	0.999872	0.999668	0.999911	0.00511588
chr3L	173	9013882	9057049	0.999872	0.989449	0.997496	0.000917509	0.853588	0.99907	0.00968548	0.000621566	0.000100739	0.993939	0.997956	0.310719	0.962643	0.396717	0.990911	0.102272	0.999516	0.0595928	0.0116773	0.764775	0.0320286	0.00765437	0.994502	0.999754	0.999541	0.22146	0.999778	0.998437	0.999801	0.999854	0.999867	0.0162041
chr3L	174	9057050	9119062	0.999756	0.970103	0.998229	0.0013053	0.854787	0.997066	0.0098137	0.00058027	0.000113516	0.995383	0.993381	0.392345	0.962903	0.491354	0.979847	0.10395	0.999383	0.0554767	0.00825027	0.812606	0.0133169	0.00805433	0.995285	0.99972	0.999609	0.239674	0.999835	0.99619	0.999849	0.999899	0.999847	0.0194335
chr3L	175	9119063	9193836	0.999759	0.912021	0.997888	0.00129901	0.858991	0.994646	0.00638538	0.000593765	7.92534e-05	0.996553	0.990715	0.455589	0.962387	0.56476	0.96465	0.12322	0.998868	0.060226	0.00764485	0.910912	0.0090265	0.0141537	0.998187	0.999785	0.999657	0.249112	0.999805	0.991236	0.999847	0.999904	0.999817	0.021388
chr3L	176	9193837	9246684	0.999885	0.779148	0.996778	0.00127727	0.864373	0.991654	0.00364887	0.000491668	0.000207505	0.997524	0.98765	0.519144	0.96106	0.645449	0.925358	0.128049	0.997472	0.0643389	0.0103419	0.943555	0.00936549	0.0174314	0.999034	0.999862	0.999812	0.25491	0.999897	0.98241	0.999915	0.999876	0.99989	0.0188132
chr3L	177	9246685	9301427	0.999897	0.753156	0.997104	0.00120919	0.871146	0.98917	0.00104046	0.000307189	0.000296113	0.99887	0.983118	0.58901	0.958838	0.755337	0.903658	0.160983	0.998446	0.0815314	0.00954244	0.955551	0.00936763	0.0242757	0.99948	0.999856	0.999854	0.249227	0.999918	0.946497	0.999941	0.999674	0.999928	0.0181982
chr3L	178	9301428	9340795	0.999878	0.752771	0.99638	0.000998398	0.867644	0.990265	0.000257879	8.66532e-05	0.000244523	0.999298	0.983566	0.654144	0.954128	0.79625	0.860631	0.373889	0.998463	0.183465	0.00990251	0.974125	0.0138128	0.0304226	0.99938	0.999666	0.999849	0.242697	0.999918	0.94189	0.999928	0.999826	0.999917	0.0243664
chr3L	179	9340796	9389437	0.999881	0.754047	0.993708	0.00161167	0.84841	0.988403	0.000178269	4.12309e-05	7.53969e-05	0.999079	0.984029	0.703045	0.955397	0.805234	0.814602	0.444496	0.997709	0.208701	0.00688791	0.988203	0.0136813	0.0313587	0.998606	0.999154	0.999873	0.217156	0.999919	0.919738	0.999925	0.999876	0.999923	0.024547
chr3L	180	9389438	9471200	0.999862	0.740661	0.983243	0.00113432	0.822653	0.986542	0.000317902	5.56784e-05	6.67809e-05	0.99784	0.980695	0.777092	0.953975	0.804268	0.808693	0.465122	0.994439	0.214451	0.00651684	0.995389	0.00952969	0.0269711	0.995182	0.997279	0.999841	0.213633	0.999895	0.846811	0.999926	0.999826	0.999912	0.0204909
chr3L	181	9471201	9518483	0.99981	0.746815	0.982108	0.00169421	0.801344	0.989981	0.00061565	8.56149e-05	7.58194e-05	0.996957	0.981541	0.877984	0.953152	0.804652	0.811236	0.473897	0.984723	0.228756	0.0100966	0.997259	0.0092742	0.0272013	0.991699	0.997897	0.999803	0.223517	0.999838	0.828507	0.999902	0.999903	0.999876	0.00757397
chr3L	182	9518484	9579564	0.999804	0.743	0.977919	0.00248806	0.782192	0.990437	0.000809162	0.000160631	6.30545e-05	0.99618	0.978698	0.905205	0.94466	0.794756	0.805732	0.471919	0.946348	0.229634	0.0318816	0.997447	0.00481377	0.0311477	0.976535	0.999016	0.999667	0.28739	0.99977	0.813154	0.999793	0.99993	0.999795	0.00513881
chr3L	183	9579565	9630332	0.999761	0.758957	0.979497	0.00340301	0.783621	0.996078	0.000862481	0.000462849	0.000106677	0.997979	0.973577	0.940783	0.933636	0.787853	0.801234	0.453226	0.832848	0.218459	0.161497	0.99645	0.00176919	0.0594582	0.964082	0.999295	0.999592	0.413243	0.99977	0.800835	0.999751	0.999915	0.999744	0.00155992
chr3L	184	9630333	9674643	0.999749	0.759663	0.985574	0.00601258	0.814482	0.997463	0.00245967	0.000636889	9.87794e-05	0.998454	0.952186	0.951903	0.899926	0.763812	0.79787	0.420863	0.814548	0.221212	0.197156	0.991843	0.000627613	0.0761729	0.958294	0.999623	0.999618	0.447029	0.999868	0.78996	0.99982	0.999937	0.999811	0.00114984
chr3L	185	9674644	9739586	0.999845	0.753931	0.995155	0.00578367	0.831734	0.997798	0.00309959	0.000658481	0.00035116	0.998308	0.888691	0.955276	0.805181	0.705074	0.812774	0.420334	0.816701	0.24462	0.25778	0.992314	0.000575649	0.178873	0.961066	0.999819	0.999728	0.454004	0.999887	0.780428	0.999869	0.999933	0.999802	0.000636306
chr3L	186	9739587	9787467	0.999853	0.736887	0.997723	0.00308327	0.834775	0.997237	0.00179075	0.000569014	0.000138295	0.996647	0.681321	0.952981	0.469405	0.656136	0.819026	0.447483	0.846998	0.336808	0.612074	0.992857	0.000673253	0.41983	0.977141	0.99988	0.9997	0.490077	0.999848	0.788194	0.999862	0.99991	0.999794	0.000203839
chr3L	187	9787468	9830063	0.999857	0.740235	0.998195	0.000666869	0.835744	0.99781	0.000435083	0.000118915	7.55169e-05	0.995049	0.543967	0.952527	0.189774	0.616449	0.828231	0.611228	0.951269	0.810511	0.710554	0.991136	0.00117615	0.707833	0.982987	0.999903	0.999783	0.497546	0.999803	0.78624	0.999856	0.999897	0.999829	0.000222227
chr3L	188	9830064	9882866	0.999695	0.747954	0.997746	0.000205621	0.826088	0.997431	0.000251186	5.90287e-05	0.000185055	0.996198	0.316005	0.949296	0.107317	0.60204	0.825977	0.6493	0.983203	0.940227	0.740233	0.983564	0.00411538	0.800321	0.984095	0.999907	0.999817	0.49192	0.999699	0.772704	0.999883	0.999921	0.999847	9.13277e-05
chr3L	189	9882867	9941296	0.999541	0.804628	0.998956	0.000211282	0.829558	0.999018	0.000286434	0.000109847	0.000259635	0.998052	0.280428	0.932791	0.0889425	0.606506	0.836989	0.896992	0.992633	0.980058	0.916939	0.983602	0.0230588	0.939786	0.994314	0.999803	0.999651	0.499919	0.999543	0.729049	0.999786	0.999875	0.999685	0.000145877
chr3L	190	9941297	9990769	0.999471	0.849417	0.999374	0.000409722	0.821318	0.999559	0.000843712	0.000291836	0.00107369	0.998228	0.257187	0.911261	0.0879764	0.595953	0.838125	0.965956	0.995839	0.989966	0.971198	0.991662	0.133325	0.97776	0.997413	0.999646	0.99954	0.543253	0.999478	0.646778	0.999627	0.999825	0.999619	0.000259161
chr3L	191	9990770	10033163	0.999488	0.884203	0.999407	0.000543975	0.801595	0.999717	0.000649288	0.000171266	0.000838709	0.997359	0.193148	0.883555	0.084081	0.599339	0.831384	0.989263	0.998496	0.997232	0.990558	0.995762	0.235987	0.990778	0.999274	0.999593	0.999521	0.557091	0.9995	0.432225	0.99957	0.999861	0.999657	8.59066e-05
chr3L	192	10033164	10093885	0.999591	0.911225	0.998852	0.000525714	0.768212	0.999576	0.00045379	0.000128968	0.000811555	0.997489	0.124308	0.847393	0.0672382	0.587204	0.828469	0.996612	0.99955	0.999223	0.997434	0.998291	0.260468	0.996481	0.999739	0.99964	0.999595	0.557676	0.99961	0.352672	0.999605	0.999898	0.999801	0.000117571
chr3L	193	10093886	10139863	0.999744	0.931294	0.998991	0.000642689	0.668244	0.998867	0.000104779	8.70489e-05	0.00068694	0.996594	0.0624123	0.794856	0.0645919	0.542407	0.842967	0.99886	0.999798	0.999745	0.99931	0.999007	0.271703	0.998279	0.999896	0.999775	0.999765	0.583246	0.999811	0.294796	0.999719	0.999929	0.999833	0.000175873
chr3L	194	10139864	10191858	0.999708	0.937686	0.999461	0.001398	0.439215	0.996451	6.04481e-05	0.000223565	0.000460633	0.998399	0.0213025	0.655595	0.0682328	0.389582	0.93276	0.999615	0.999832	0.999873	0.999739	0.999663	0.26904	0.999218	0.999915	0.99978	0.999775	0.694583	0.999904	0.277232	0.999656	0.999919	0.999785	0.000724003
chr3L	195	10191859	10232720	0.99976	0.936766	0.999818	0.00171623	0.230623	0.986892	0.000127282	0.000526538	0.000555695	0.999183	0.0149912	0.264954	0.0712716	0.135904	0.957226	0.999811	0.999899	0.999919	0.99983	0.999799	0.245433	0.999335	0.999926	0.999799	0.999808	0.721782	0.999913	0.262845	0.999685	0.999928	0.999806	0.000358987
chr3L	196	10232721	10278336	0.999764	0.934557	0.999892	0.0020124	0.195368	0.9572	0.000111919	0.00085487	0.000194708	0.999383	0.015073	0.0456849	0.0782889	0.0697455	0.975716	0.999796	0.999918	0.999913	0.99973	0.999728	0.234987	0.998959	0.999943	0.999863	0.999831	0.887942	0.999877	0.251533	0.999754	0.999931	0.999751	0.000118966
chr3L	197	10278337	10321953	0.999748	0.940703	0.999938	0.00220678	0.191771	0.931108	8.1217e-05	0.000195441	0.000262506	0.999069	0.02081	0.00934978	0.124033	0.0258144	0.980054	0.999902	0.999923	0.99992	0.999174	0.999268	0.235848	0.999649	0.999937	0.999861	0.999771	0.933109	0.999861	0.235534	0.999713	0.999922	0.999878	4.33437e-05
chr3L	198	10321954	10373879	0.999642	0.981834	0.999936	0.00273481	0.195038	0.909544	0.000242122	6.1568e-05	0.00095992	0.99768	0.0435503	0.00313543	0.412865	0.0184811	0.993104	0.999919	0.9999	0.999924	0.997207	0.997565	0.264826	0.999807	0.999918	0.999818	0.999563	0.944165	0.999846	0.16315	0.999581	0.999923	0.999871	4.93339e-05
chr3L	199	10373880	10424684	0.999622	0.994433	0.999906	0.00337068	0.229084	0.904473	0.00131125	5.93221e-05	0.000965239	0.995251	0.0483567	0.00156385	0.538922	0.0117272	0.997088	0.99994	0.999873	0.999923	0.990578	0.994308	0.437705	0.999842	0.999901	0.999663	0.999408	0.954586	0.999895	0.152961	0.999461	0.999888	0.999808	4.18253e-05
chr3L	200	10424685	10468113	0.999706	0.998413	0.999776	0.0034929	0.248973	0.886177	0.00106037	0.000200314	0.0013981	0.987965	0.0514975	0.000782312	0.578107	0.00641958	0.997931	0.999948	0.999888	0.999945	0.966762	0.986869	0.53834	0.999894	0.999919	0.999022	0.99933	0.955744	0.999918	0.149355	0.999425	0.999906	0.999855	9.73492e-05
chr3L	201	10468114	10510460	0.999769	0.999376	0.999903	0.00355755	0.251972	0.886743	0.00128713	0.000197182	0.00468766	0.971317	0.0480433	0.000164425	0.588286	0.00608872	0.998886	0.99995	0.999864	0.999948	0.872884	0.986404	0.582473	0.999889	0.999922	0.99762	0.999315	0.960544	0.999936	0.124875	0.999453	0.999892	0.999833	0.000473188
chr3L	202	10510461	10556878	0.999777	0.999522	0.99992	0.00353207	0.241593	0.880435	0.00187511	0.000185396	0.01106	0.949334	0.0333545	8.73155e-05	0.58494	0.00722619	0.999022	0.999945	0.999846	0.999939	0.855261	0.985972	0.610109	0.999844	0.999907	0.993379	0.999327	0.988308	0.999923	0.0351543	0.999491	0.999828	0.999791	0.000789288
chr3L	203	10556879	10610674	0.999655	0.999545	0.999932	0.00340609	0.234835	0.879389	0.00483834	0.000131734	0.0138966	0.920228	0.0260549	0.000184799	0.604728	0.00956126	0.998403	0.99993	0.999819	0.999908	0.840898	0.981338	0.624367	0.999682	0.999856	0.990072	0.999347	0.996842	0.999882	0.0117465	0.999477	0.99972	0.999791	0.00164583
chr3L	204	10610675	10646091	0.999641	0.999322	0.999923	0.00276465	0.230201	0.885689	0.00975581	0.000384172	0.0248544	0.915916	0.0255285	0.000340119	0.628962	0.0136483	0.997678	0.999931	0.999897	0.999861	0.825513	0.976518	0.63472	0.999485	0.999716	0.982412	0.999439	0.999006	0.999855	0.00789163	0.99955	0.99973	0.999905	0.00106125
chr3L	205	10646092	10691108	0.999734	0.998411	0.999922	0.00202781	0.230135	0.898026	0.0149821	0.00121417	0.0272896	0.922069	0.0304891	0.00127525	0.692255	0.0377825	0.995593	0.999925	0.999916	0.999812	0.75769	0.964975	0.641834	0.99968	0.999097	0.981344	0.99961	0.999523	0.999681	0.00676621	0.999714	0.999858	0.999913	0.000432528
chr3L	206	10691109	10737760	0.999796	0.995975	0.999875	0.00291232	0.232172	0.916706	0.0220233	0.00633974	0.0471255	0.929195	0.0369791	0.00232199	0.741339	0.122784	0.995438	0.999854	0.999908	0.999842	0.742721	0.933887	0.639287	0.999871	0.999632	0.981329	0.999733	0.999606	0.999859	0.00841293	0.999828	0.999929	0.999889	0.000253864
chr3L	207	10737761	10776947	0.999738	0.994662	0.999694	0.00741333	0.258169	0.939473	0.0228552	0.00741435	0.0514687	0.942397	0.0658656	0.00404462	0.79875	0.226828	0.993427	0.999918	0.999821	0.99968	0.730722	0.928926	0.619269	0.999885	0.999755	0.989444	0.999616	0.999774	0.999893	0.0134976	0.999766	0.999941	0.999751	0.000267221
chr3L	208	10776948	10815877	0.999801	0.990457	0.99936	0.0118108	0.267971	0.962419	0.0248597	0.0058564	0.04913	0.95217	0.097167	0.00693026	0.85748	0.307497	0.985494	0.999921	0.99984	0.999627	0.717743	0.935268	0.590872	0.999919	0.999843	0.991256	0.9996	0.999828	0.999896	0.0160124	0.99983	0.999925	0.999734	0.000128
chr3L	209	10815878	10865991	0.999861	0.991047	0.999721	0.016479	0.277912	0.980337	0.0271855	0.00620246	0.0535531	0.96198	0.284229	0.0101457	0.903143	0.369981	0.985362	0.999935	0.999897	0.999635	0.678011	0.934066	0.55272	0.999929	0.999918	0.99104	0.999687	0.999859	0.999916	0.0159685	0.999892	0.99994	0.999825	0.000203574
chr3L	210	10865992	10904490	0.999859	0.993474	0.999849	0.022118	0.305514	0.994381	0.0244451	0.0058955	0.0511972	0.986603	0.756621	0.0141313	0.969406	0.461047	0.981274	0.999922	0.9999	0.999497	0.557436	0.943857	0.5485	0.999912	0.999915	0.988585	0.999683	0.999821	0.99991	0.0124178	0.999915	0.999931	0.999854	0.000906344
chr3L	211	10904491	10944291	0.999885	0.994034	0.999901	0.0242934	0.310032	0.998345	0.0143103	0.00214069	0.0356176	0.994917	0.922942	0.0140326	0.990296	0.485042	0.964141	0.999865	0.999876	0.999439	0.522501	0.944421	0.564188	0.999867	0.999917	0.978298	0.999765	0.999838	0.999889	0.00916177	0.999929	0.999935	0.999886	0.000665987
chr3L	212	10944292	10996131	0.999819	0.99399	0.99988	0.0269977	0.340505	0.999415	0.0107262	0.00153062	0.0328736	0.998584	0.965099	0.0201044	0.996088	0.631077	0.951176	0.999678	0.999803	0.998735	0.499892	0.938979	0.664283	0.999648	0.999909	0.943378	0.999736	0.999794	0.999715	0.00542645	0.999904	0.999918	0.999888	0.00133253
chr3L	213	10996132	11041936	0.999812	0.9937	0.999839	0.0372588	0.354876	0.999689	0.00840777	0.00226263	0.0337464	0.999584	0.984336	0.0440267	0.997312	0.694642	0.940626	0.999575	0.999595	0.995846	0.413252	0.917812	0.739586	0.998957	0.999839	0.938907	0.999738	0.999779	0.99915	0.00481843	0.99992	0.999895	0.999882	0.00155149
chr3L	214	11041937	11091236	0.999882	0.996575	0.999825	0.0654594	0.424004	0.999684	0.00905494	0.00291313	0.0411637	0.99984	0.993118	0.0748612	0.998921	0.765245	0.940498	0.999538	0.998811	0.986422	0.11545	0.837197	0.784796	0.996969	0.999705	0.921568	0.999818	0.999869	0.997412	0.00427821	0.999889	0.99993	0.999895	0.00100867
chr3L	215	11091237	11137805	0.99986	0.998852	0.99983	0.153797	0.58679	0.999391	0.0108101	0.00445204	0.0525491	0.999889	0.996405	0.204994	0.999449	0.904516	0.943172	0.999329	0.999501	0.984877	0.0683767	0.574533	0.797645	0.997223	0.999674	0.920183	0.999832	0.999906	0.991539	0.00450246	0.99991	0.99994	0.999886	0.000589585
chr3L	216	11137806	11184129	0.999775	0.999511	0.999903	0.179425	0.633852	0.99811	0.00972943	0.00384042	0.0546494	0.9999	0.99744	0.235414	0.999617	0.938608	0.956753	0.999418	0.999551	0.988716	0.061001	0.530894	0.824778	0.99818	0.99924	0.919541	0.999753	0.999874	0.99084	0.00561033	0.999877	0.999938	0.999849	0.000519178
chr3L	217	11184130	11223591	0.999674	0.999576	0.999925	0.185979	0.650389	0.993931	0.0129094	0.00589427	0.0748268	0.999874	0.998281	0.253044	0.999449	0.949805	0.963208	0.999375	0.9993	0.989675	0.0621889	0.523363	0.918625	0.99807	0.998095	0.925175	0.999605	0.99986	0.993611	0.00670861	0.999814	0.999915	0.999764	0.000309822
chr3L	218	11223592	11278411	0.999577	0.999723	0.999932	0.186897	0.684866	0.978154	0.016627	0.0081513	0.0817859	0.999668	0.999026	0.289047	0.99858	0.950897	0.967696	0.998749	0.998446	0.987715	0.0744627	0.494028	0.953772	0.996687	0.993701	0.943161	0.9995	0.999917	0.997218	0.00849963	0.999801	0.999903	0.999787	0.000280825
chr3L	219	11278412	11322283	0.99951	0.999592	0.999939	0.173045	0.694732	0.97405	0.0166302	0.00742838	0.0815397	0.998813	0.999492	0.332217	0.999473	0.957533	0.968818	0.996241	0.996538	0.978257	0.108608	0.49087	0.962722	0.992521	0.981426	0.970701	0.999432	0.999934	0.998377	0.0109516	0.999789	0.999868	0.999763	8.12687e-05
chr3L	220	11322284	11367947	0.999476	0.999737	0.999925	0.161746	0.73559	0.97376	0.0226539	0.00255487	0.0729662	0.998384	0.999621	0.382596	0.999688	0.962566	0.965592	0.985981	0.991973	0.947134	0.115869	0.466659	0.966633	0.979217	0.934884	0.979726	0.999391	0.999942	0.998379	0.0103907	0.999714	0.999779	0.999616	8.74722e-05
chr3L	221	11367948	11410076	0.999528	0.999718	0.999904	0.164692	0.816717	0.982456	0.0335539	0.001207	0.0373998	0.996799	0.999824	0.577129	0.999781	0.970024	0.951381	0.94965	0.985404	0.833375	0.115275	0.395375	0.968998	0.959337	0.82863	0.982338	0.999427	0.999948	0.997627	0.00509118	0.999728	0.999724	0.999577	0.000192883
chr3L	222	11410077	11447076	0.999622	0.99939	0.999796	0.168613	0.879783	0.992343	0.100391	0.00137005	0.00980357	0.995571	0.999896	0.792789	0.999742	0.984036	0.951308	0.8367	0.973624	0.501959	0.101828	0.138211	0.966561	0.903111	0.680251	0.981044	0.999544	0.999929	0.995452	0.00189988	0.999809	0.999725	0.999432	0.000421101
chr3L	223	11447077	11513848	0.999814	0.999784	0.999486	0.173745	0.965763	0.995275	0.134046	0.00365792	0.003548	0.996717	0.999931	0.84954	0.999824	0.992525	0.94367	0.819591	0.95312	0.146537	0.0445944	0.0711428	0.970915	0.734274	0.463108	0.979143	0.999748	0.999874	0.988395	0.00156266	0.999851	0.999542	0.999212	0.000490715
chr3L	224	11513849	11569144	0.999904	0.999881	0.998371	0.213486	0.987015	0.998183	0.200466	0.00364038	0.00121254	0.996531	0.999906	0.86725	0.999879	0.996218	0.91626	0.818951	0.86932	0.0877486	0.0154379	0.0314512	0.978189	0.672156	0.421325	0.972129	0.999861	0.999754	0.965362	0.0011135	0.999816	0.998975	0.998643	0.000424862
chr3L	225	11569145	11637083	0.999935	0.999929	0.995438	0.221961	0.994531	0.999032	0.219317	0.00333441	0.000325081	0.99514	0.999774	0.916891	0.999897	0.997193	0.828879	0.83176	0.826988	0.0692045	0.011028	0.016819	0.980402	0.663822	0.418269	0.96694	0.99991	0.999372	0.960851	0.00063809	0.999559	0.996729	0.997754	0.000315147
chr3L	226	11637084	11675068	0.999924	0.999944	0.983428	0.220078	0.996243	0.999607	0.257481	0.000688413	0.000116617	0.989299	0.999899	0.963323	0.999873	0.997027	0.484297	0.852115	0.82177	0.0670285	0.00756588	0.00444436	0.987187	0.657972	0.42048	0.963399	0.999893	0.999718	0.957213	0.000213048	0.999798	0.996195	0.999142	7.30052e-05
chr3L	227	11675069	11733995	0.999922	0.999939	0.980437	0.227064	0.997237	0.999795	0.500422	0.000270217	7.76428e-05	0.966178	0.999909	0.974195	0.999888	0.996021	0.430926	0.867218	0.795892	0.0713312	0.0052686	0.00241389	0.989451	0.654104	0.424525	0.966005	0.99991	0.999789	0.952064	0.000188819	0.999878	0.998776	0.999673	4.48233e-05
chr3L	228	11733996	11789145	0.999921	0.999887	0.983251	0.221777	0.998724	0.999843	0.581089	0.0003059	0.000112901	0.877468	0.99991	0.978051	0.999866	0.992582	0.255744	0.89075	0.795717	0.102918	0.0060511	0.00256973	0.988731	0.6735	0.470541	0.98749	0.999902	0.999748	0.953123	0.000163545	0.999915	0.999533	0.999784	5.40795e-05
chr3L	229	11789146	11837396	0.999881	0.99989	0.994744	0.194282	0.998889	0.999842	0.60914	0.00102446	0.000430731	0.860869	0.999896	0.977258	0.999807	0.980583	0.22523	0.955623	0.820462	0.224564	0.0119785	0.0031569	0.984897	0.797172	0.764205	0.995147	0.999883	0.999676	0.956324	7.46339e-05	0.999895	0.999765	0.999793	7.48445e-05
chr3L	230	11837397	11880541	0.999884	0.999838	0.997865	0.0751514	0.998516	0.999719	0.616438	0.00147836	0.000117078	0.8235	0.999861	0.971854	0.999781	0.94323	0.223825	0.979942	0.830276	0.636841	0.0349148	0.00455413	0.976059	0.833496	0.854293	0.998528	0.999849	0.999357	0.983313	0.000123813	0.999894	0.999764	0.999834	7.28274e-05
chr3L	231	11880542	11924179	0.99991	0.999564	0.998662	0.0550086	0.998087	0.999603	0.609769	0.000826633	0.0001045	0.767171	0.999924	0.96042	0.999712	0.880251	0.217606	0.986414	0.851636	0.741297	0.0399063	0.00526149	0.955704	0.888644	0.887875	0.999361	0.99981	0.998888	0.992272	8.84635e-05	0.999868	0.999563	0.999865	0.000182389
chr3L	232	11924180	12015544	0.999931	0.998891	0.998454	0.0505588	0.997041	0.999229	0.582853	0.00115694	7.03127e-05	0.641854	0.999934	0.926063	0.999482	0.753895	0.217381	0.987437	0.858349	0.768284	0.0406599	0.00337263	0.915634	0.907718	0.895839	0.999769	0.999874	0.998085	0.994291	0.000104469	0.999837	0.999024	0.999918	0.000203229
chr3L	233	12015545	12051092	0.999914	0.996585	0.996733	0.0276165	0.993118	0.998062	0.465292	0.000360644	0.000134801	0.244018	0.999943	0.794021	0.998762	0.341264	0.20297	0.996449	0.908153	0.929418	0.0505144	0.00395688	0.909701	0.968862	0.910675	0.999871	0.999877	0.999276	0.997795	9.79059e-05	0.999877	0.999349	0.999894	9.53679e-05
chr3L	234	12051093	12083776	0.999809	0.99578	0.997181	0.00655958	0.992076	0.998348	0.438185	0.000130373	0.000169495	0.178289	0.999923	0.716168	0.995595	0.268368	0.19878	0.998899	0.967925	0.977161	0.0518453	0.00924948	0.905318	0.991822	0.912565	0.999854	0.999863	0.999641	0.999359	3.48786e-05	0.999877	0.999704	0.999899	3.57283e-05
chr3L	235	12083777	12124620	0.999791	0.996884	0.996177	0.00287897	0.992485	0.99925	0.383522	0.000141665	4.77799e-05	0.154413	0.99983	0.705717	0.989337	0.25841	0.200095	0.999523	0.987827	0.989263	0.0550504	0.0120964	0.890491	0.997643	0.906469	0.999868	0.999818	0.999821	0.999706	2.76288e-05	0.99988	0.999755	0.999884	3.10889e-05
chr3L	236	12124621	12170371	0.999872	0.996697	0.992188	0.000624406	0.991011	0.99936	0.175891	4.92061e-05	3.57228e-05	0.142948	0.99949	0.65516	0.975058	0.250589	0.189104	0.999593	0.995361	0.992388	0.054758	0.0280013	0.830078	0.999058	0.880406	0.999898	0.999866	0.999915	0.999771	2.85266e-05	0.999905	0.999656	0.999917	2.77851e-05
chr3L	237	12170372	12216662	0.999881	0.99754	0.992864	0.000288658	0.99173	0.99915	0.0874156	5.78651e-05	7.83598e-05	0.146814	0.999051	0.647568	0.920697	0.256873	0.17363	0.999747	0.998187	0.99753	0.059017	0.107433	0.819548	0.999304	0.87887	0.999902	0.999852	0.999925	0.999878	4.68947e-05	0.99987	0.999827	0.999923	4.5377e-05
chr3L	238	12216663	12266061	0.999874	0.997	0.991765	0.000455131	0.990523	0.998134	0.0592363	6.19463e-05	0.000231615	0.139454	0.997445	0.632578	0.712176	0.262317	0.114815	0.999628	0.999245	0.999101	0.090413	0.322144	0.772463	0.99971	0.894994	0.999905	0.99984	0.999898	0.999864	4.07949e-05	0.999848	0.999801	0.999935	8.18425e-05
chr3L	239	12266062	12310094	0.999879	0.997425	0.991376	0.000497142	0.989911	0.997442	0.0334374	0.0001226	0.000263863	0.132789	0.998025	0.629756	0.522366	0.26912	0.0963738	0.998913	0.999566	0.999619	0.289536	0.431097	0.638022	0.999725	0.904243	0.999917	0.999881	0.999903	0.9997	3.25358e-05	0.999891	0.999897	0.999917	0.000273866
chr3L	240	12310095	12353204	0.999905	0.997743	0.996052	0.00120304	0.989865	0.99883	0.0296086	0.000471536	0.000266736	0.140487	0.999022	0.652307	0.452469	0.298863	0.0829501	0.997046	0.999832	0.999667	0.376311	0.595193	0.598912	0.999846	0.931571	0.999908	0.999887	0.99991	0.999078	4.53914e-05	0.999908	0.999907	0.999834	0.000166038
chr3L	241	12353205	12398309	0.999915	0.998458	0.998088	0.00194208	0.986241	0.999267	0.0300561	0.000674996	0.000100599	0.138101	0.999159	0.687141	0.437265	0.303113	0.0646085	0.995726	0.999865	0.999308	0.742213	0.649497	0.579938	0.99984	0.957191	0.999907	0.999862	0.999924	0.999465	0.000140685	0.999907	0.999926	0.999808	0.000413768
chr3L	242	12398310	12439247	0.999883	0.998214	0.998683	0.00113178	0.975513	0.999648	0.0272301	0.000772442	0.000168879	0.125742	0.998923	0.692934	0.409459	0.299683	0.0608808	0.997407	0.999764	0.999522	0.85056	0.668944	0.547215	0.999712	0.964684	0.999915	0.999848	0.99991	0.999608	0.000363115	0.999899	0.999912	0.999829	0.00117392
chr3L	243	12439248	12479855	0.999879	0.997509	0.998507	0.00157795	0.969918	0.999626	0.0267216	0.000752148	0.000299362	0.121986	0.999603	0.705673	0.396533	0.301116	0.0665054	0.997454	0.99941	0.999453	0.878764	0.66918	0.470979	0.99946	0.986304	0.999914	0.999825	0.999881	0.999398	0.000116096	0.999886	0.999886	0.999838	0.000810728
chr3L	244	12479856	12527107	0.999852	0.999062	0.99941	0.00198326	0.971956	0.999697	0.0348604	0.00191442	0.000650298	0.126981	0.999724	0.72303	0.403342	0.330726	0.0792245	0.997181	0.998374	0.998737	0.887253	0.658738	0.221782	0.998529	0.993577	0.999908	0.999847	0.999878	0.99852	0.000122403	0.999897	0.999816	0.999832	0.000944723
chr3L	245	12527108	12565867	0.999822	0.999424	0.999759	0.00118612	0.970117	0.999687	0.0354483	0.00228366	0.000148604	0.126188	0.999713	0.726583	0.399982	0.340547	0.0986214	0.998643	0.999215	0.999534	0.92393	0.667132	0.129683	0.999435	0.995806	0.99985	0.999758	0.999823	0.999364	0.000139417	0.999815	0.999498	0.999732	0.00100291
chr3L	246	12565868	12609735	0.999808	0.999363	0.999899	0.00102897	0.966029	0.999744	0.0306614	0.000846448	4.7972e-05	0.122067	0.999654	0.720453	0.385909	0.343859	0.102058	0.999053	0.999655	0.999763	0.933613	0.664255	0.114815	0.999685	0.997403	0.999788	0.999767	0.999875	0.999639	0.000435728	0.999838	0.998868	0.999697	0.00252493
chr3L	247	12609736	12654628	0.999768	0.998574	0.999911	0.00081463	0.953854	0.999515	0.0266804	0.000593566	5.04824e-05	0.11108	0.999139	0.723835	0.386505	0.366467	0.0967401	0.998765	0.999827	0.999758	0.935332	0.639973	0.0945069	0.99963	0.998017	0.99967	0.999671	0.999803	0.999673	0.000308523	0.999853	0.997227	0.999751	0.00290875
chr3L	248	12654629	12701548	0.999831	0.997294	0.999921	0.000591725	0.952506	0.999049	0.0161991	0.000494446	5.65744e-05	0.0806556	0.997822	0.717334	0.37854	0.368739	0.0818482	0.99726	0.99989	0.999569	0.931153	0.551077	0.0724975	0.999448	0.99855	0.999348	0.999674	0.999826	0.999496	0.000244069	0.999893	0.993507	0.999764	0.0015957
chr3L	249	12701549	12750961	0.999806	0.998151	0.99985	0.000295956	0.952015	0.998962	0.0151383	0.000806123	6.27884e-05	0.0714918	0.998723	0.730767	0.373554	0.381424	0.068428	0.990774	0.999898	0.998804	0.910586	0.250313	0.0616111	0.998663	0.998895	0.998808	0.999687	0.999835	0.998668	0.000563344	0.999874	0.982445	0.999841	0.00134058
chr3L	250	12750962	12794268	0.999826	0.998787	0.999844	0.00037511	0.948263	0.998877	0.00786892	0.000518625	5.73001e-05	0.0577429	0.9995	0.732048	0.353199	0.383843	0.0288203	0.990334	0.999941	0.995742	0.897392	0.197273	0.0609495	0.996058	0.999181	0.998196	0.999779	0.999839	0.996214	0.000535181	0.999874	0.978857	0.9999	0.00102056
chr3L	251	12794269	12841141	0.99988	0.998616	0.999664	0.000310165	0.947594	0.998171	0.00212931	0.000373774	6.89371e-05	0.0578478	0.999644	0.735031	0.347407	0.423254	0.0224568	0.991473	0.999942	0.994849	0.899095	0.190631	0.0736714	0.996416	0.999497	0.997385	0.999825	0.999894	0.996887	0.000157251	0.999884	0.97992	0.999918	0.00062573
chr3L	252	12841142	12882276	0.999805	0.997157	0.998975	0.000733136	0.938108	0.995929	0.00123782	0.000431539	0.000154946	0.0484521	0.99942	0.739847	0.361686	0.430772	0.0112961	0.997309	0.999912	0.99715	0.912269	0.187678	0.156353	0.998729	0.999492	0.998685	0.999711	0.999854	0.998941	0.000171504	0.999792	0.992201	0.999878	0.00101421
chr3L	253	12882277	12939681	0.99985	0.991239	0.996618	0.00344285	0.929667	0.989912	0.000717593	0.000360346	0.000130439	0.0132223	0.998396	0.748887	0.379321	0.472239	0.00941372	0.998628	0.999914	0.997609	0.915977	0.202429	0.580668	0.999534	0.999584	0.999339	0.999687	0.99991	0.999658	0.000136786	0.999817	0.99806	0.999907	0.00135983
chr3L	254	12939682	12998172	0.999897	0.971255	0.98895	0.00625875	0.902727	0.972062	0.000359043	0.000453332	7.23689e-05	0.0078392	0.999165	0.74401	0.38699	0.480886	0.00483133	0.998803	0.999914	0.99923	0.93208	0.22535	0.796328	0.999812	0.999647	0.999639	0.999671	0.999937	0.999844	0.000287453	0.999851	0.999437	0.999918	0.00131006
chr3L	255	12998173	13050596	0.999916	0.912087	0.960783	0.00927582	0.897731	0.920048	0.000193471	0.000603374	0.000116822	0.00183842	0.999187	0.713452	0.385853	0.475751	0.00171135	0.998086	0.999925	0.99959	0.939832	0.374208	0.850854	0.999906	0.999798	0.999774	0.999747	0.999944	0.999846	0.000663868	0.999889	0.999798	0.99991	0.000861717
chr3L	256	13050597	13098268	0.999865	0.776735	0.956848	0.00902025	0.874786	0.735778	0.000133	0.000923883	0.000334928	0.000886034	0.998491	0.652499	0.366716	0.443257	0.00121682	0.999415	0.999922	0.999813	0.952289	0.776883	0.933275	0.999928	0.999794	0.999703	0.999678	0.999917	0.999877	0.00305722	0.999844	0.99986	0.999852	0.000817205
chr3L	257	13098269	13151835	0.999849	0.756097	0.957575	0.00874461	0.854243	0.704779	7.83766e-05	0.00111566	0.000578535	0.000536245	0.998456	0.597933	0.349997	0.413782	0.000626517	0.999781	0.999932	0.999892	0.955417	0.903805	0.958481	0.999943	0.999746	0.999718	0.999717	0.999896	0.99992	0.00355185	0.999818	0.999906	0.999825	0.00195874
chr3L	258	13151836	13200560	0.99986	0.728307	0.951191	0.00860757	0.798381	0.694861	0.000200994	0.0016553	0.00128471	0.000896489	0.997336	0.551271	0.32083	0.394104	0.000205938	0.999898	0.999907	0.999926	0.95348	0.939524	0.964925	0.999934	0.999711	0.999751	0.99971	0.99976	0.99994	0.00260052	0.999835	0.99989	0.999812	0.00862624
chr3L	259	13200561	13252719	0.999908	0.727636	0.954148	0.00861203	0.747956	0.686988	0.000403135	0.00104205	0.000776916	0.00352443	0.995516	0.533944	0.219974	0.378105	0.00023259	0.999916	0.99991	0.999936	0.940823	0.966487	0.966349	0.999928	0.999792	0.99984	0.999715	0.99971	0.999943	0.00216394	0.999866	0.999889	0.999801	0.00965727
chr3L	260	13252720	13305214	0.999896	0.726425	0.961808	0.00861788	0.705838	0.680364	0.000452885	0.000312595	0.000144608	0.00697439	0.994272	0.519883	0.182784	0.363745	0.000112331	0.999911	0.999911	0.999895	0.906422	0.973204	0.968696	0.99993	0.999868	0.999851	0.999674	0.999503	0.99992	0.00354213	0.99989	0.999877	0.999814	0.0119806
chr3L	261	13305215	13357290	0.999917	0.738946	0.962927	0.00874995	0.664674	0.683636	0.000457735	0.000275222	4.60009e-05	0.0250296	0.993937	0.500972	0.169881	0.355405	0.000240692	0.999883	0.99993	0.999915	0.902286	0.973426	0.96869	0.999932	0.999884	0.999868	0.999751	0.998457	0.999898	0.00355875	0.999905	0.999885	0.999878	0.0147008
chr3L	262	13357291	13404549	0.999931	0.736869	0.976131	0.00897045	0.655917	0.688822	0.000685449	0.0001753	4.48027e-05	0.033862	0.991729	0.483985	0.17081	0.34299	0.00110589	0.999726	0.99994	0.999923	0.882535	0.968603	0.964623	0.99992	0.999891	0.999918	0.999834	0.99925	0.999917	0.000854405	0.999923	0.999912	0.999877	0.020447
chr3L	263	13404550	13472327	0.999938	0.716461	0.978699	0.0137411	0.632055	0.683436	0.00200632	0.00011505	5.86132e-05	0.0346441	0.985586	0.470275	0.162125	0.301818	0.00196191	0.999832	0.999917	0.999929	0.882425	0.971206	0.9516	0.999832	0.999875	0.999909	0.999839	0.999623	0.999884	0.000207137	0.999923	0.999906	0.999854	0.0216872
chr3L	264	13472328	13573991	0.999923	0.656255	0.978009	0.0144884	0.53845	0.663726	0.00179261	7.82932e-05	6.94582e-05	0.0320153	0.974977	0.405517	0.129437	0.185117	0.00283643	0.999812	0.99981	0.999896	0.872823	0.97028	0.910502	0.999515	0.999802	0.999907	0.999838	0.999752	0.999787	0.000158078	0.999925	0.999886	0.999834	0.0178738
chr3L	265	13573992	13667297	0.999888	0.418531	0.975171	0.0108782	0.486254	0.61671	0.00335726	0.000222722	0.000235006	0.0329402	0.951351	0.374342	0.122046	0.142165	0.00859897	0.999554	0.999648	0.999732	0.869609	0.962371	0.804528	0.998726	0.999849	0.999872	0.999723	0.999752	0.99977	5.94293e-05	0.999934	0.999893	0.999829	0.0179013
chr3L	266	13667298	13733232	0.99988	0.227203	0.978259	0.00777544	0.418835	0.58635	0.00428874	0.000191848	0.00025447	0.0327581	0.897327	0.343284	0.117737	0.112502	0.0147438	0.999793	0.999807	0.999832	0.855354	0.938169	0.787247	0.999603	0.999853	0.999872	0.999699	0.999788	0.999732	7.44433e-05	0.999914	0.999865	0.999811	0.0141097
chr3L	267	13733233	13797647	0.999896	0.166137	0.987629	0.00519707	0.331858	0.556006	0.00464698	0.000225505	0.000103786	0.0314573	0.852366	0.302877	0.114614	0.0854221	0.0257043	0.999774	0.999909	0.99976	0.815463	0.868047	0.726297	0.999801	0.999852	0.999901	0.999752	0.999865	0.999801	3.8787e-05	0.999907	0.99991	0.999874	0.0113563
chr3L	268	13797648	13867685	0.999882	0.148735	0.990537	0.00269035	0.274214	0.548183	0.00505777	0.000708554	0.000190906	0.03766	0.843405	0.29582	0.110824	0.0821075	0.0965906	0.999438	0.999919	0.99967	0.668063	0.582491	0.624991	0.999852	0.999807	0.99991	0.999784	0.999888	0.999814	4.57225e-05	0.999892	0.999928	0.999907	0.00872483
chr3L	269	13867686	13915536	0.999849	0.086569	0.990331	0.00167089	0.245318	0.529237	0.00359545	0.000597793	0.000274001	0.0385868	0.809413	0.26081	0.0946145	0.0663327	0.12009	0.999802	0.999867	0.999301	0.644182	0.537674	0.599413	0.999893	0.999816	0.999914	0.999769	0.999884	0.999798	0.000128859	0.99985	0.999934	0.99992	0.00496069
chr3L	270	13915537	13956685	0.999885	0.0621055	0.995731	0.000574549	0.207691	0.512337	0.00210873	0.00102031	0.000293014	0.0397237	0.781144	0.229114	0.0837241	0.0548116	0.258875	0.999883	0.99974	0.997808	0.642283	0.448727	0.492671	0.999912	0.999866	0.999917	0.999791	0.999849	0.999814	0.000633454	0.999835	0.999929	0.999922	0.00158073
chr3L	271	13956686	14026638	0.999937	0.0571294	0.996819	0.000327704	0.177058	0.471098	0.000583994	0.00137393	0.000190298	0.0354706	0.743391	0.200525	0.0747458	0.0494501	0.299511	0.999841	0.999284	0.997106	0.626038	0.0882472	0.100093	0.999879	0.99992	0.999938	0.999768	0.999836	0.999909	0.00016505	0.999916	0.999935	0.999944	0.000289758
chr3L	272	14026639	14077900	0.999941	0.0371178	0.99635	0.000279332	0.151479	0.306338	0.000444652	0.000638696	0.000496855	0.024146	0.597045	0.193738	0.0337507	0.0267248	0.383124	0.999781	0.999418	0.996519	0.623235	0.0276135	0.0212472	0.999762	0.999902	0.999934	0.999861	0.999895	0.999915	0.000129493	0.999928	0.999919	0.999934	7.4066e-05
chr3L	273	14077901	14118717	0.999905	0.0350055	0.998158	0.000688708	0.0730875	0.222622	0.00054049	0.000391441	0.000216027	0.0232686	0.440121	0.195424	0.0260404	0.0234555	0.594766	0.999905	0.999718	0.998847	0.645514	0.00972878	0.00779764	0.999905	0.999841	0.99989	0.999805	0.99989	0.999857	5.23623e-05	0.999888	0.999922	0.999881	4.98158e-05
chr3L	274	14118718	14167334	0.999793	0.0232205	0.998921	0.00100654	0.0501053	0.132698	0.000630363	0.000182762	0.000238613	0.0229297	0.297207	0.199171	0.0219505	0.0220169	0.848973	0.999936	0.999808	0.999553	0.672568	0.00638996	0.0038766	0.999934	0.999687	0.999724	0.999717	0.999772	0.999727	6.08133e-05	0.999717	0.999924	0.999801	0.000128516
chr3L	275	14167335	14206474	0.999726	0.0135053	0.999609	0.00119522	0.0269395	0.0499804	0.000706006	0.000224519	0.000131557	0.0227383	0.166997	0.202794	0.0180869	0.0207066	0.929077	0.999932	0.999866	0.999768	0.705271	0.00674417	0.00363035	0.999925	0.999615	0.999632	0.999571	0.999757	0.999714	5.45147e-05	0.999633	0.99993	0.999832	6.24282e-05
chr3L	276	14206475	14252739	0.999677	0.0109313	0.999824	0.00133623	0.0206029	0.0335334	0.000659939	0.000240288	0.000273879	0.0215719	0.144425	0.214121	0.0188119	0.0183394	0.969553	0.999941	0.999886	0.999812	0.744678	0.0123369	0.00401927	0.999928	0.999602	0.999623	0.999471	0.999756	0.999804	3.80548e-05	0.999625	0.99993	0.999876	0.000104616
chr3L	277	14252740	14317853	0.999714	0.0106784	0.999916	0.00135401	0.0148253	0.0317116	0.000517431	9.0924e-05	0.00026434	0.0193554	0.139677	0.222126	0.0198572	0.0147631	0.991203	0.999946	0.999898	0.999824	0.75295	0.0188813	0.00496678	0.999942	0.999657	0.999675	0.999457	0.999773	0.999883	4.47997e-05	0.999679	0.99994	0.999878	0.000264098
chr3L	278	14317854	14371466	0.999749	0.0154703	0.999926	0.00128193	0.00987683	0.0310795	0.000612464	3.98406e-05	0.000393455	0.0159463	0.135488	0.231202	0.019979	0.012015	0.996933	0.999952	0.999913	0.999686	0.750042	0.0196477	0.00393609	0.999931	0.999747	0.999728	0.999506	0.999771	0.99992	0.000129215	0.999704	0.99993	0.999893	0.000254244
chr3L	279	14371467	14430819	0.999868	0.0210922	0.99989	0.00100628	0.00524169	0.032122	0.000593498	5.54804e-05	0.000217178	0.0111252	0.131934	0.245561	0.0191852	0.00805952	0.998866	0.999955	0.999929	0.999195	0.753258	0.0187843	0.00437524	0.999941	0.9998	0.999852	0.999643	0.99986	0.999939	6.38701e-05	0.999824	0.999875	0.999924	7.66963e-05
chr3L	280	14430820	14495476	0.999892	0.0415931	0.999877	0.00100333	0.00172349	0.0336519	0.000471902	0.000144221	7.9041e-05	0.00780801	0.134799	0.251006	0.0184638	0.00659864	0.999546	0.999949	0.999904	0.999651	0.790731	0.0182302	0.00856619	0.999933	0.999746	0.999896	0.999666	0.999889	0.999922	0.000121857	0.99984	0.999748	0.99992	4.10107e-05
chr3L	281	14495477	14547098	0.999909	0.0659773	0.999753	0.000936006	0.000597088	0.0340395	0.000156427	4.95726e-05	7.14666e-05	0.00428995	0.135707	0.244861	0.0167958	0.00431019	0.999827	0.999948	0.999922	0.999672	0.835809	0.0139568	0.0114302	0.999906	0.9998	0.999913	0.999798	0.999905	0.999894	6.75711e-05	0.999852	0.999415	0.999935	3.37153e-05
chr3L	282	14547099	14591208	0.999914	0.0718072	0.99925	0.00092115	0.000538082	0.0418857	0.000138974	6.06163e-05	8.92651e-05	0.00423181	0.159702	0.247117	0.0154672	0.00210136	0.999901	0.999943	0.999925	0.999343	0.852113	0.0134961	0.0108329	0.999915	0.999848	0.999919	0.999831	0.999914	0.999901	3.0342e-05	0.999892	0.999379	0.99991	5.70021e-05
chr3L	283	14591209	14652564	0.9999	0.111008	0.999204	0.000956209	0.0003168	0.0882298	0.000364051	7.20119e-05	4.24411e-05	0.00451279	0.207461	0.250674	0.0161469	0.000731475	0.999886	0.999946	0.999932	0.999046	0.857952	0.012125	0.0152589	0.999928	0.999849	0.99993	0.999864	0.999934	0.999907	2.62001e-05	0.99992	0.999403	0.999925	3.42468e-05
chr3L	284	14652565	14717606	0.999819	0.217278	0.999321	0.000896793	0.000655013	0.205324	0.000461684	5.59194e-05	5.01595e-05	0.00484583	0.279466	0.288566	0.0259603	0.000568252	0.999815	0.999934	0.999912	0.99921	0.905333	0.0140265	0.0423241	0.999946	0.999751	0.99989	0.999838	0.999917	0.999863	2.76575e-05	0.999918	0.998952	0.999936	5.98478e-05
chr3L	285	14717607	14791093	0.999851	0.263341	0.998835	0.00139457	0.000945406	0.333901	0.000408157	0.000165434	0.00015065	0.00523634	0.74185	0.53069	0.0595785	0.000851189	0.999882	0.999941	0.999935	0.998746	0.929278	0.0129539	0.0492377	0.999945	0.999777	0.9999	0.999828	0.999905	0.999896	4.07052e-05	0.99992	0.998987	0.999925	0.00017549
chr3L	286	14791094	14863335	0.999886	0.539169	0.998687	0.000648614	0.00128855	0.47504	0.00019092	0.00017103	7.26555e-05	0.00838054	0.900198	0.859759	0.093017	0.000992367	0.999926	0.999921	0.99993	0.999632	0.934648	0.0075576	0.0493534	0.999943	0.999776	0.999905	0.999835	0.999919	0.999876	5.17227e-05	0.999929	0.998896	0.99993	0.000135385
chr3L	287	14863336	14939050	0.999882	0.608843	0.997386	0.000582004	0.000570108	0.752621	0.00013365	0.000631138	6.4925e-05	0.0104246	0.95369	0.955786	0.100326	0.00100764	0.999925	0.99985	0.999916	0.999844	0.932547	0.00574073	0.0601175	0.999938	0.999785	0.999861	0.999791	0.999884	0.999816	0.000181979	0.999881	0.998963	0.999919	0.000134065
chr3L	288	14939051	14988154	0.999922	0.699243	0.996553	0.000354827	0.000697887	0.820649	4.92848e-05	0.000230816	7.17467e-05	0.0122689	0.980729	0.988245	0.0980044	0.00065165	0.999929	0.999913	0.999923	0.999919	0.919478	0.00555261	0.0607712	0.999915	0.999863	0.999911	0.999855	0.999925	0.99988	0.000225707	0.999918	0.99826	0.999888	5.47298e-05
chr3L	289	14988155	15041077	0.999903	0.738375	0.992866	0.000690181	0.00171327	0.83694	5.10746e-05	0.000114035	8.02853e-05	0.0137205	0.99027	0.995882	0.0868601	0.000843592	0.999899	0.999921	0.999875	0.999918	0.917456	0.00679128	0.0523114	0.999793	0.999882	0.999901	0.999844	0.999917	0.999871	0.000632767	0.99991	0.998645	0.999732	8.89686e-05
chr3L	290	15041078	15105689	0.999864	0.74568	0.979456	0.00133319	0.0019913	0.838879	0.000164813	0.000248653	0.000262827	0.0239078	0.993514	0.998195	0.0432557	0.00172865	0.999748	0.999887	0.999656	0.999933	0.919433	0.00877012	0.0470037	0.999474	0.999855	0.999841	0.999745	0.999862	0.999772	0.000963644	0.999823	0.998273	0.999307	5.03531e-05
chr3L	291	15105690	15178763	0.999855	0.745138	0.978194	0.00200517	0.00231125	0.856787	0.000266332	0.000206665	0.00027332	0.0559743	0.995909	0.999319	0.0310573	0.00399308	0.999698	0.999874	0.99897	0.999905	0.932395	0.0118249	0.0393122	0.998574	0.999825	0.999881	0.999704	0.999871	0.999786	0.00121415	0.999852	0.998988	0.999725	0.000111149
chr3L	292	15178764	15243164	0.999878	0.770721	0.977677	0.00198445	0.00478549	0.88171	0.00034507	0.00063446	0.000140471	0.063162	0.996858	0.999702	0.0302323	0.00641445	0.999427	0.999909	0.999433	0.999912	0.948253	0.0313618	0.032872	0.999402	0.999692	0.999886	0.999594	0.999876	0.999761	0.000771974	0.999887	0.999141	0.999789	5.55465e-05
chr3L	293	15243165	15288274	0.999879	0.799886	0.985195	0.00152531	0.00781266	0.901003	0.000730085	0.000972368	0.000156544	0.0681982	0.996998	0.99977	0.0301182	0.00798833	0.998594	0.999888	0.99964	0.999887	0.952124	0.0367714	0.0314405	0.999681	0.999629	0.999882	0.999585	0.999895	0.999768	0.00125098	0.999903	0.998849	0.999806	9.68875e-05
chr3L	294	15288275	15354341	0.999883	0.811706	0.987367	0.00146413	0.0123364	0.922874	0.00142599	0.000213548	0.000213205	0.105856	0.996053	0.999702	0.0364192	0.0096219	0.996815	0.999835	0.999812	0.999729	0.949912	0.036686	0.0229603	0.999865	0.99965	0.999862	0.999653	0.999881	0.999782	0.000451536	0.999896	0.998069	0.999847	0.000142833
chr3L	295	15354342	15414789	0.999816	0.86154	0.996597	0.00127267	0.0171443	0.944918	0.00253371	0.00012649	9.38612e-05	0.134849	0.991425	0.999255	0.0432453	0.0113104	0.989858	0.999852	0.999763	0.999835	0.957463	0.0430088	0.023141	0.999894	0.9995	0.999747	0.999494	0.999742	0.999671	0.000412953	0.999803	0.998431	0.999718	0.000620276
chr3L	296	15414790	15475690	0.999721	0.921354	0.999	0.00118113	0.0167941	0.958105	0.00357662	0.000143043	0.000124426	0.319271	0.984883	0.998747	0.0435172	0.0121718	0.974491	0.999833	0.999745	0.999831	0.958981	0.0426177	0.0307599	0.999903	0.999437	0.999716	0.99942	0.99972	0.999627	0.00113416	0.999751	0.998775	0.999665	0.000261887
chr3L	297	15475691	15552938	0.999743	0.942226	0.999579	0.00101525	0.0154711	0.960472	0.00401517	0.000445672	0.000402091	0.373513	0.975645	0.997331	0.0382181	0.0170972	0.913817	0.999717	0.999844	0.999731	0.954339	0.0363427	0.0309329	0.999921	0.999456	0.999803	0.999427	0.999813	0.999689	0.000585123	0.999823	0.999125	0.999688	0.00015866
chr3L	298	15552939	15641732	0.999775	0.967466	0.999705	0.00221183	0.0173112	0.981141	0.00536546	0.000632419	0.000967367	0.447426	0.962166	0.99541	0.038145	0.0223933	0.813277	0.999228	0.999889	0.999245	0.950922	0.0157474	0.0250456	0.999938	0.999567	0.99988	0.999422	0.999879	0.999763	0.00060403	0.999866	0.999431	0.999717	0.000195154
chr3L	299	15641733	15691394	0.999778	0.97519	0.999743	0.00180702	0.0170646	0.986433	0.00494978	0.000354671	0.000469454	0.47151	0.942645	0.990133	0.030586	0.022069	0.406824	0.999531	0.999893	0.999684	0.957245	0.0128373	0.00594568	0.999916	0.999542	0.999832	0.999435	0.999906	0.999817	0.00115833	0.999876	0.99964	0.999703	5.99453e-05
chr3L	300	15691395	15753845	0.999848	0.976793	0.99963	0.00137	0.0119278	0.987984	0.0027481	0.000635453	0.000411042	0.473129	0.885945	0.983477	0.029507	0.0161909	0.310396	0.999519	0.999914	0.999791	0.958382	0.0144766	0.00225482	0.999909	0.999612	0.9999	0.999529	0.999922	0.999876	0.00123429	0.999909	0.999618	0.999735	4.40306e-05
chr3L	301	15753846	15836131	0.999916	0.980199	0.999791	0.00093348	0.00779557	0.990466	0.000570648	0.000859091	0.000258025	0.494654	0.838934	0.965522	0.0285375	0.0106975	0.295057	0.999113	0.999928	0.999685	0.957641	0.0125502	0.00148798	0.999897	0.999736	0.999882	0.999688	0.999902	0.999894	0.000273888	0.999878	0.999285	0.999785	6.30927e-05
chr3L	302	15836132	15904826	0.999903	0.981886	0.999719	0.000700609	0.0069989	0.993464	0.000222121	0.000575996	0.000295447	0.5246	0.830968	0.963063	0.0337595	0.00558951	0.295548	0.998516	0.999885	0.999521	0.952033	0.0121486	0.00218113	0.999916	0.999695	0.999826	0.999646	0.999843	0.999856	0.000141382	0.999805	0.999528	0.999832	0.000213179
chr3L	303	15904827	15980931	0.999875	0.981427	0.999755	0.000263942	0.00633699	0.995871	0.000103929	0.00031765	0.000191415	0.54746	0.835577	0.959574	0.0373515	0.00134263	0.293618	0.996073	0.999892	0.998644	0.951525	0.016312	0.00396735	0.999889	0.999768	0.999832	0.999713	0.999834	0.99985	0.000292036	0.99982	0.999461	0.999867	0.000221441
chr3L	304	15980932	16046704	0.999804	0.979664	0.999902	0.000358918	0.00171669	0.99612	0.000194936	0.000512979	0.000491035	0.691636	0.830642	0.959276	0.0394051	0.000703333	0.296499	0.995215	0.999788	0.998807	0.963117	0.0311243	0.0145304	0.999918	0.999742	0.999757	0.999643	0.999741	0.999791	0.00141653	0.999743	0.999798	0.999852	0.000450535
chr3L	305	16046705	16153995	0.999842	0.974438	0.99993	0.00132197	0.000875332	0.99483	0.000509128	0.000106184	0.00243716	0.730667	0.811869	0.964623	0.0355437	0.000650552	0.286812	0.99082	0.999366	0.998165	0.966299	0.107504	0.0168141	0.999932	0.999773	0.999771	0.999681	0.999776	0.999837	0.00110029	0.999788	0.999894	0.999866	0.00151829
chr3L	306	16153996	16217495	0.999876	0.965548	0.99993	0.000995482	0.00076301	0.994059	0.00103577	5.25299e-05	0.0105929	0.774953	0.773969	0.970801	0.0322813	0.000895255	0.295314	0.991537	0.999677	0.999342	0.987203	0.596657	0.0186684	0.999942	0.999785	0.999822	0.999757	0.999831	0.999896	0.0010817	0.99983	0.999924	0.999873	0.00250458
chr3L	307	16217496	16269456	0.999868	0.964192	0.999879	0.000599352	0.00170697	0.995376	0.00469582	2.86357e-05	0.0152126	0.828398	0.760029	0.979243	0.0288281	0.00117906	0.305749	0.989553	0.999704	0.999576	0.992425	0.720639	0.0175189	0.999934	0.999758	0.999805	0.999778	0.999807	0.999934	0.00266637	0.999818	0.999947	0.999824	0.00392663
chr3L	308	16269457	16316381	0.999903	0.957828	0.999808	0.000194345	0.00351007	0.99676	0.00525155	2.94276e-05	0.017506	0.840687	0.698873	0.981604	0.0151474	0.000461154	0.301141	0.981393	0.999487	0.999524	0.993238	0.774586	0.0144632	0.999895	0.999855	0.999835	0.999863	0.999859	0.999938	0.00439668	0.99991	0.999951	0.999891	0.00328102
chr3L	309	16316382	16377739	0.999923	0.944712	0.999448	9.01787e-05	0.00353834	0.996627	0.00337164	4.6162e-05	0.0156252	0.84555	0.685768	0.982075	0.00819554	0.000464871	0.298478	0.972813	0.998686	0.999061	0.99162	0.801619	0.00870125	0.999754	0.999902	0.999789	0.999905	0.999852	0.999931	0.00538488	0.999931	0.999944	0.999921	0.00160898
chr3L	310	16377740	16444429	0.999895	0.934047	0.998156	0.000166973	0.00125115	0.994866	0.00367373	0.000150082	0.0107474	0.849949	0.684492	0.979467	0.00723138	0.000958679	0.29663	0.972111	0.999556	0.998751	0.992173	0.855775	0.00778837	0.999873	0.999867	0.999634	0.999839	0.999879	0.999894	0.00865902	0.999895	0.999903	0.999922	0.000402408
chr3L	311	16444430	16494850	0.999804	0.91251	0.997857	0.000307307	0.00101115	0.993675	0.0039144	7.1056e-05	0.0098249	0.857983	0.685509	0.976781	0.00626812	0.00132385	0.298174	0.97757	0.999772	0.9994	0.990641	0.906382	0.00898361	0.999892	0.999739	0.9991	0.999698	0.999844	0.999818	0.0083623	0.999836	0.999748	0.999909	0.000130284
chr3L	312	16494851	16554547	0.999756	0.910068	0.997929	0.000277199	0.000692872	0.993115	0.00407311	6.84278e-05	0.00870237	0.863683	0.687757	0.977545	0.00543115	0.00155287	0.300438	0.978706	0.999899	0.999554	0.983036	0.919321	0.00736114	0.999901	0.999731	0.998286	0.99967	0.999861	0.999833	0.00672244	0.999837	0.999174	0.999908	4.7211e-05
chr3L	313	16554548	16673365	0.999794	0.911779	0.999389	0.000149388	0.000288388	0.996877	0.00425637	6.25985e-05	0.00776266	0.867417	0.679619	0.978933	0.0046214	0.0013772	0.334112	0.977555	0.999927	0.999239	0.9816	0.921188	0.00744969	0.999863	0.999825	0.996466	0.999733	0.999849	0.99983	0.00223662	0.999853	0.998348	0.999919	5.0234e-05
chr3L	314	16673366	16736968	0.999747	0.927766	0.999784	0.000218977	0.000290336	0.997665	0.00439811	8.40462e-05	0.001534	0.860421	0.660563	0.977668	0.00663518	0.00191767	0.3406	0.979734	0.99994	0.998947	0.980145	0.922827	0.00641878	0.999745	0.999875	0.992837	0.999787	0.999841	0.999815	0.000542508	0.999873	0.99947	0.999907	0.00014829
chr3L	315	16736969	16793464	0.999726	0.932369	0.999874	0.000360632	0.000979681	0.997406	0.00216056	0.000265723	0.000580282	0.854841	0.57886	0.973823	0.00680898	0.00135327	0.33242	0.978514	0.999945	0.997515	0.973214	0.929169	0.00641421	0.999525	0.999867	0.983423	0.999817	0.999852	0.999813	0.000303083	0.999912	0.999763	0.999886	0.000325216
chr3L	316	16793465	16859196	0.999731	0.929773	0.999898	0.00128264	0.00160454	0.998384	0.00100039	0.000272554	0.000351028	0.850303	0.560657	0.974664	0.0120459	0.00216269	0.327174	0.970812	0.999947	0.991305	0.973151	0.972034	0.00302265	0.998525	0.999807	0.956983	0.999859	0.99979	0.999792	0.000580841	0.999918	0.999767	0.999818	0.000366074
chr3L	317	16859197	16906973	0.999844	0.92257	0.999894	0.00217835	0.0040555	0.998994	0.00111215	0.000752587	0.000383713	0.84994	0.55133	0.971539	0.0286278	0.00298609	0.32451	0.957912	0.999944	0.983209	0.968947	0.988672	0.00067199	0.994419	0.999865	0.920511	0.999832	0.999843	0.999863	0.000239514	0.999921	0.999885	0.999877	0.000302976
chr3L	318	16906974	16976426	0.999878	0.892506	0.999924	0.00278661	0.00399711	0.99885	0.00040061	0.000161405	9.41876e-05	0.835069	0.506548	0.958475	0.0328094	0.0018771	0.331801	0.947403	0.999939	0.961527	0.958447	0.99425	0.000351356	0.994727	0.999864	0.786361	0.999824	0.999842	0.999876	8.74767e-05	0.999913	0.999925	0.999883	0.000719667
chr3L	319	16976427	17069122	0.999876	0.884734	0.999921	0.00195663	0.00655137	0.999031	0.000374113	7.94088e-05	6.32311e-05	0.824801	0.498134	0.915332	0.0383567	0.00220783	0.37914	0.938945	0.999934	0.959267	0.9592	0.99699	0.000604169	0.996439	0.999797	0.733584	0.99975	0.999842	0.999869	0.000118481	0.999873	0.99991	0.999879	0.000173803
chr3L	320	17069123	17164947	0.999888	0.890157	0.99986	0.00167667	0.0226961	0.998455	0.000215382	7.92907e-05	0.000151755	0.817653	0.500485	0.834497	0.0543589	0.00315266	0.394526	0.935721	0.99989	0.965735	0.96536	0.998329	0.000227649	0.996254	0.999776	0.724833	0.999776	0.999837	0.999898	0.000158726	0.999878	0.999786	0.99989	0.000118737
chr3L	321	17164948	17234223	0.999876	0.88685	0.999755	0.00127688	0.0634142	0.998172	0.000171717	3.42279e-05	8.07316e-05	0.807724	0.531351	0.494842	0.0718141	0.00557544	0.464876	0.941928	0.999867	0.971882	0.975292	0.99875	0.000306928	0.998623	0.999651	0.73468	0.999708	0.999818	0.999898	0.000265569	0.999858	0.999311	0.999876	0.000177992
chr3L	322	17234224	17319589	0.999812	0.893979	0.999437	0.000776653	0.0808079	0.998175	0.000496967	3.64516e-05	0.000190399	0.794374	0.688873	0.406427	0.0944032	0.0118105	0.480204	0.940711	0.999763	0.972663	0.980138	0.998585	0.00071147	0.999228	0.999433	0.808772	0.999702	0.999779	0.999869	0.00112889	0.999825	0.997372	0.999818	0.000326658
chr3L	323	17319590	17437831	0.999851	0.893461	0.999084	0.000147192	0.0929469	0.997217	0.00131892	8.74357e-05	7.65716e-05	0.786571	0.747717	0.347868	0.101357	0.0130336	0.479598	0.949595	0.999454	0.968809	0.980113	0.998177	0.0031776	0.999258	0.999289	0.841298	0.999811	0.999864	0.999896	0.000936122	0.999908	0.989734	0.999895	0.000306037
chr3L	324	17437832	17534027	0.999841	0.882935	0.997836	5.21936e-05	0.0965763	0.993125	0.000812096	0.000387105	8.20476e-05	0.752106	0.766827	0.125679	0.0999572	0.0112488	0.461667	0.963028	0.999801	0.965809	0.980525	0.999128	0.0187941	0.999557	0.999445	0.851902	0.999775	0.999857	0.999829	0.000355804	0.999906	0.988965	0.999911	8.90729e-05
chr3L	325	17534028	17616803	0.999858	0.876849	0.998117	5.60773e-05	0.101147	0.991438	0.000209317	0.0022898	5.92551e-05	0.749029	0.791568	0.0911965	0.0994932	0.0103049	0.445744	0.973159	0.999878	0.967793	0.987387	0.999628	0.0231077	0.999423	0.999635	0.858871	0.999849	0.999909	0.99987	0.000174434	0.999907	0.992745	0.999922	8.09022e-05
chr3L	326	17616804	17690333	0.999836	0.87417	0.997176	0.000190585	0.138764	0.992866	0.000178967	0.00275097	8.41818e-05	0.756859	0.855655	0.080728	0.0994883	0.0112624	0.431494	0.978084	0.999876	0.978103	0.990766	0.999798	0.025904	0.998601	0.999738	0.857802	0.999855	0.999921	0.999852	0.000187321	0.999903	0.993119	0.999915	0.000113074
chr3L	327	17690334	17767736	0.999853	0.857556	0.993869	0.000434929	0.147031	0.992367	0.000132337	0.00503994	9.67165e-05	0.790853	0.876584	0.0710634	0.105718	0.0191128	0.378487	0.978429	0.999711	0.979971	0.991923	0.999842	0.0348478	0.996256	0.999855	0.851902	0.999865	0.999878	0.99985	6.89637e-05	0.999924	0.991507	0.99991	6.7077e-05
chr3L	328	17767737	17862007	0.999866	0.859014	0.980224	0.00120145	0.148057	0.989196	0.000351487	0.00509933	5.0425e-05	0.799931	0.934321	0.0712273	0.112552	0.0404111	0.330248	0.988608	0.999811	0.981799	0.991777	0.999872	0.0734449	0.995897	0.999876	0.836031	0.999891	0.999905	0.999872	6.35343e-05	0.999929	0.991478	0.999915	0.000112051
chr3L	329	17862008	17927499	0.999822	0.86012	0.97144	0.00151383	0.138014	0.978323	0.000257484	0.00485589	3.55025e-05	0.796023	0.959483	0.0632826	0.110242	0.0462669	0.324584	0.994788	0.99987	0.995204	0.996921	0.999846	0.303219	0.99856	0.999849	0.834033	0.999844	0.999878	0.999848	0.00018754	0.999895	0.997042	0.99989	0.000143377
chr3L	330	17927500	17991763	0.999759	0.853849	0.946415	0.00198217	0.113589	0.946819	0.000296268	0.00398069	6.33543e-05	0.773728	0.967095	0.0349947	0.0987859	0.0452292	0.294713	0.998589	0.999883	0.99838	0.998459	0.999818	0.517388	0.99958	0.999836	0.85201	0.999733	0.999834	0.999823	0.00101028	0.999851	0.998335	0.999828	0.000524125
chr3L	331	17991764	18035392	0.999771	0.858905	0.880182	0.0009827	0.0932545	0.919506	0.000164194	0.00304889	5.39538e-05	0.744772	0.974897	0.00885085	0.0834798	0.0444079	0.293779	0.99959	0.999879	0.999373	0.998797	0.999894	0.582827	0.999831	0.999839	0.854834	0.999704	0.999899	0.999891	0.000899223	0.999921	0.998839	0.999874	0.000373479
chr3L	332	18035393	18101245	0.999894	0.853568	0.760485	0.00076513	0.0924836	0.895081	0.000181564	0.00180544	3.36743e-05	0.716526	0.983733	0.00478987	0.0633392	0.0438349	0.281793	0.99983	0.999916	0.999714	0.998266	0.99993	0.599826	0.999912	0.999893	0.847615	0.99979	0.999934	0.999908	0.000217864	0.99993	0.998748	0.99993	0.000122412
chr3L	333	18101246	18140656	0.999919	0.843005	0.699876	0.00040264	0.0921013	0.891235	0.000108124	0.000587546	4.95806e-05	0.696466	0.993961	0.00133897	0.0370684	0.0440951	0.289215	0.999905	0.999934	0.99978	0.996129	0.99994	0.600783	0.999927	0.9999	0.844213	0.999714	0.999945	0.999909	0.000137446	0.999922	0.998343	0.999931	0.000134798
chr3L	334	18140657	18188851	0.999897	0.796828	0.689839	0.000570451	0.0821448	0.875725	0.000279616	0.000491652	0.000159161	0.628305	0.998267	0.000543261	0.0325098	0.054685	0.286442	0.999925	0.99994	0.99989	0.993424	0.99993	0.58584	0.999931	0.999884	0.857341	0.999548	0.999931	0.9999	0.000236622	0.999917	0.997876	0.999896	0.00051386
chr3L	335	18188852	18230895	0.99984	0.790973	0.698632	0.000694045	0.0730478	0.872792	0.00148247	0.00027651	9.57781e-05	0.578869	0.999262	0.000614574	0.0310796	0.119753	0.266522	0.999897	0.999924	0.999935	0.982114	0.999912	0.537042	0.999937	0.999836	0.878021	0.999438	0.999915	0.999789	0.000357394	0.999836	0.995849	0.999917	0.000442829
chr3L	336	18230896	18276804	0.999836	0.776526	0.753758	0.00103252	0.066637	0.871282	0.00115457	8.49106e-05	7.02886e-05	0.515039	0.999777	0.000549648	0.0284348	0.192455	0.19848	0.99983	0.999919	0.999935	0.981278	0.999885	0.505057	0.999937	0.999856	0.882669	0.999411	0.999901	0.999746	0.000343084	0.999839	0.987415	0.999923	0.000346022
chr3L	337	18276805	18324352	0.999816	0.7794	0.766348	0.00116734	0.0705299	0.870966	0.00104338	0.00010257	0.000184973	0.451214	0.999903	0.000147588	0.0244054	0.248732	0.187642	0.99952	0.99992	0.999936	0.977748	0.999838	0.470648	0.999939	0.999875	0.898205	0.999427	0.999873	0.999737	0.000999236	0.999829	0.951593	0.999878	0.000553642
chr3L	338	18324353	18372289	0.999835	0.792037	0.855524	0.00116335	0.102419	0.881549	0.000885727	0.000127806	0.000137977	0.401471	0.999935	0.0001435	0.0213401	0.304906	0.185381	0.998525	0.999923	0.999893	0.976032	0.999781	0.332805	0.999949	0.999846	0.9003	0.999524	0.999812	0.999758	0.00107801	0.999839	0.938774	0.999922	0.000646702
chr3L	339	18372290	18423346	0.999845	0.819882	0.879986	0.00102429	0.18853	0.889442	0.000587965	0.000269525	0.00020584	0.337166	0.999923	0.000185203	0.0184686	0.348294	0.192792	0.995648	0.99994	0.999744	0.978693	0.999805	0.310006	0.999949	0.999836	0.897407	0.999704	0.999831	0.999808	0.000370213	0.999866	0.902131	0.999913	0.000625981
chr3L	340	18423347	18489553	0.999802	0.919883	0.930814	0.00102678	0.518676	0.924002	0.000403563	0.000238717	0.000336599	0.279465	0.999838	0.000373898	0.0154005	0.39734	0.207075	0.992751	0.999921	0.999281	0.97696	0.999742	0.310046	0.999944	0.999739	0.884702	0.999684	0.99979	0.999711	0.000181207	0.999778	0.871712	0.999832	0.00148015
chr3L	341	18489554	18563484	0.999808	0.950412	0.961468	0.000966459	0.619862	0.938851	0.000650738	6.28209e-05	0.000631261	0.237141	0.999735	0.000330883	0.0163727	0.413476	0.21265	0.982009	0.999906	0.997691	0.966506	0.99971	0.30136	0.999935	0.999697	0.854508	0.99973	0.999789	0.999552	0.000320651	0.999567	0.759751	0.999457	0.000897605
chr3L	342	18563485	18625111	0.999852	0.96029	0.984645	0.000816508	0.646658	0.94325	0.000740188	3.39909e-05	0.000126554	0.233	0.999699	0.000974944	0.0193265	0.437787	0.232546	0.949721	0.999875	0.995172	0.924644	0.999687	0.26122	0.999871	0.999751	0.801648	0.999797	0.999805	0.99945	0.000295761	0.999294	0.337523	0.998726	0.000897763
chr3L	343	18625112	18703791	0.999858	0.962841	0.990862	0.000556417	0.661244	0.942249	0.00218694	3.22237e-05	4.47447e-05	0.231595	0.999496	0.000479604	0.0202312	0.441252	0.236896	0.896259	0.999821	0.984273	0.903718	0.999304	0.255721	0.999592	0.99966	0.600161	0.999862	0.99961	0.998975	0.000104338	0.998422	0.181408	0.996064	0.000768049
chr3L	344	18703792	18799530	0.999862	0.965262	0.995636	0.000562703	0.762026	0.953167	0.00949376	3.54393e-05	3.70441e-05	0.230124	0.999032	0.000706875	0.0261905	0.453237	0.254543	0.877006	0.999511	0.975388	0.902605	0.999677	0.24938	0.998722	0.999747	0.56625	0.999762	0.999783	0.999374	0.000128643	0.999216	0.0539338	0.991763	0.000498834
chr3L	345	18799531	18857152	0.999876	0.98553	0.997703	0.000430369	0.899204	0.965786	0.0185768	5.43234e-05	6.59885e-05	0.228543	0.999617	0.00087831	0.0320942	0.47549	0.371912	0.876938	0.99949	0.973727	0.904852	0.999814	0.249307	0.99938	0.999773	0.477389	0.999771	0.999849	0.999557	0.000518124	0.999532	0.0131169	0.992222	0.000680149
chr3L	346	18857153	18928142	0.999921	0.990756	0.998616	0.000787059	0.933983	0.96815	0.01997	0.000207195	0.000135055	0.224597	0.999793	0.00145111	0.0716374	0.522581	0.402315	0.868602	0.999397	0.966664	0.926845	0.999913	0.231484	0.99968	0.999861	0.213783	0.99988	0.999911	0.999802	0.000172175	0.999833	0.00341669	0.990933	0.000288057
chr3L	347	18928143	18994182	0.999925	0.991638	0.998777	0.000457427	0.945384	0.966052	0.0167232	7.32675e-05	0.000164894	0.201344	0.99986	0.000767142	0.0846553	0.535434	0.408877	0.87451	0.999717	0.944663	0.932803	0.999915	0.231374	0.999732	0.999888	0.129495	0.999853	0.999934	0.999896	5.0118e-05	0.999889	0.00183912	0.991203	7.84187e-05
chr3L	348	18994183	19061941	0.999914	0.994471	0.998082	0.00019871	0.94642	0.953855	0.0106091	3.53923e-05	7.11513e-05	0.196515	0.999928	0.000731089	0.171016	0.533901	0.423782	0.878232	0.999892	0.878356	0.974756	0.999917	0.219675	0.999448	0.999898	0.115761	0.999852	0.999927	0.999909	4.09961e-05	0.999916	0.00167374	0.997032	7.31983e-05
chr3L	349	19061942	19152733	0.999916	0.998143	0.999467	0.00031552	0.96259	0.942102	0.0048811	3.50961e-05	5.74124e-05	0.193138	0.999937	0.000693289	0.257242	0.547495	0.486215	0.871647	0.99993	0.854316	0.987593	0.999924	0.206824	0.998954	0.999886	0.0668647	0.999848	0.999928	0.999912	9.17398e-05	0.999934	0.00164696	0.998801	0.000114789
chr3L	350	19152734	19228766	0.999901	0.998938	0.999829	0.000322506	0.966819	0.934827	0.00193569	8.92656e-05	0.000150567	0.190666	0.999928	0.000505498	0.459764	0.614169	0.501221	0.862253	0.999907	0.798591	0.994129	0.999914	0.188937	0.998609	0.999858	0.0527168	0.999779	0.99991	0.999888	0.000272949	0.999908	0.00117317	0.999202	0.000223728
chr3L	351	19228767	19321311	0.999872	0.998973	0.999921	0.000160234	0.980136	0.928672	0.000439273	0.000109768	0.000104078	0.191079	0.999887	0.000206102	0.702004	0.705043	0.519723	0.82732	0.99981	0.586267	0.996206	0.999894	0.132778	0.998018	0.999828	0.0525176	0.999743	0.999876	0.999853	0.000284571	0.999875	0.000693661	0.998958	0.000767298
chr3L	352	19321312	19413652	0.999839	0.998143	0.999939	0.000317958	0.985559	0.908613	0.000220291	0.00024576	0.000302178	0.175889	0.999801	0.000334349	0.759414	0.725821	0.637119	0.810244	0.999461	0.553354	0.996286	0.999874	0.12077	0.995417	0.999816	0.0508258	0.999703	0.999822	0.999853	0.000452671	0.999881	0.00107857	0.998012	0.00156134
chr3L	353	19413653	19523861	0.999799	0.999295	0.999941	0.00030641	0.994179	0.903467	0.000135883	0.00022701	0.00033114	0.172268	0.999899	0.000298922	0.838474	0.8529	0.787374	0.81108	0.998208	0.452619	0.994421	0.999872	0.0997646	0.985028	0.999818	0.0532201	0.999711	0.999745	0.999876	0.000386614	0.999904	0.00350843	0.997717	0.000964522
chr3L	354	19523862	19652255	0.999724	0.999742	0.999924	0.000146529	0.996345	0.909373	0.00018851	0.000319527	0.000269402	0.174104	0.999896	0.000300224	0.866158	0.890347	0.837897	0.812724	0.998993	0.386017	0.988489	0.999815	0.0941263	0.981016	0.999693	0.0743926	0.999612	0.999489	0.999778	0.000223455	0.99982	0.00642273	0.998981	0.000265588
chr3L	355	19652256	19896947	0.999754	0.999844	0.999909	0.000261458	0.997173	0.906171	0.000649916	0.000274377	0.000201264	0.169172	0.999894	0.000928775	0.875109	0.898643	0.856208	0.80394	0.999029	0.122968	0.964119	0.999861	0.0688043	0.965268	0.999679	0.0798149	0.999615	0.999309	0.999808	0.000161971	0.999856	0.00891552	0.999193	0.000116724
chr3L	356	19896948	20036707	0.999864	0.999838	0.999935	0.00087025	0.998878	0.904283	0.00148986	0.000570709	0.000314826	0.161633	0.999834	0.00154328	0.88164	0.904728	0.865209	0.798557	0.998308	0.0764659	0.884557	0.999907	0.0659991	0.964265	0.999778	0.112787	0.999685	0.999146	0.999873	0.000241892	0.999888	0.0087292	0.999731	0.000193266
chr3L	357	20036708	20166079	0.999902	0.999707	0.999923	0.00147542	0.999526	0.890794	0.00140056	0.000168722	0.000287561	0.169681	0.999823	0.00254596	0.922211	0.930382	0.86711	0.782395	0.996071	0.0636396	0.871782	0.99991	0.0736363	0.95621	0.999863	0.137301	0.999792	0.999604	0.999912	0.000186206	0.999891	0.00851908	0.999882	9.23298e-05
chr3L	358	20166080	20313830	0.999858	0.999841	0.999894	0.00321495	0.999746	0.845028	0.00248065	0.000118881	0.000121509	0.171462	0.999716	0.00964504	0.931681	0.935596	0.861084	0.731411	0.993857	0.05764	0.868061	0.999812	0.0734194	0.95724	0.999878	0.144371	0.999776	0.999639	0.999867	9.3265e-05	0.999778	0.0129794	0.999906	7.63166e-05
chr3L	359	20313831	20499130	0.999746	0.999877	0.999908	0.00291817	0.9998	0.702219	0.00205435	0.000150912	0.000126006	0.162349	0.999615	0.011292	0.931523	0.934414	0.842093	0.614194	0.986022	0.0509064	0.874505	0.999673	0.0625873	0.953085	0.999794	0.145689	0.999629	0.999563	0.999726	0.000213285	0.999639	0.0253257	0.999912	0.000111731
chr3L	360	20499131	20638057	0.999688	0.999861	0.999865	0.00184914	0.999846	0.41565	0.000529075	5.59055e-05	0.000361124	0.13504	0.999562	0.0102547	0.924811	0.926451	0.808672	0.584354	0.960412	0.0520055	0.87868	0.999622	0.0608917	0.953813	0.999703	0.141881	0.999563	0.999561	0.999665	0.000183982	0.999587	0.0324014	0.99989	5.66941e-05
chr3L	361	20638058	20758571	0.999676	0.999703	0.999634	0.0015235	0.999879	0.334475	0.000255599	4.18244e-05	0.000427375	0.116317	0.999521	0.00543956	0.924607	0.919515	0.708735	0.45994	0.863825	0.0457619	0.875476	0.999625	0.0702174	0.948341	0.999685	0.145233	0.999563	0.999609	0.999673	0.00014078	0.999613	0.0387546	0.999859	0.000118643
chr3L	362	20758572	20906699	0.999774	0.999148	0.999191	0.00107645	0.999916	0.117158	0.00013242	5.6645e-05	0.000328798	0.0959996	0.999572	0.00362545	0.917511	0.920116	0.580128	0.0913726	0.615097	0.0252307	0.862717	0.999732	0.0696187	0.927791	0.99978	0.159343	0.99966	0.999756	0.999791	0.000272164	0.99974	0.038471	0.999901	0.000129909
chr3L	363	20906700	21050257	0.999813	0.99923	0.999698	0.00175992	0.999923	0.0799989	4.60344e-05	0.000118222	0.000296857	0.0938511	0.999695	0.002136	0.912078	0.913288	0.272456	0.0260512	0.574465	0.0225984	0.866237	0.999851	0.0684797	0.887149	0.999832	0.211643	0.9998	0.999852	0.999864	0.000260243	0.999852	0.0437176	0.999937	0.000255656
chr3L	364	21050258	21180769	0.999857	0.998791	0.999809	0.00114491	0.99993	0.0753478	3.75429e-05	6.61615e-05	0.000134514	0.103368	0.999659	0.000749621	0.904345	0.917849	0.21091	0.0133911	0.540715	0.0258031	0.862893	0.999893	0.0605177	0.740763	0.999827	0.274141	0.999822	0.999869	0.999874	0.000105936	0.999891	0.0434055	0.999926	0.000379127
chr3L	365	21180770	21352013	0.999838	0.997291	0.999709	0.00119691	0.999909	0.0775666	7.692e-05	0.00015802	0.000146003	0.103271	0.9998	0.000516013	0.873586	0.913913	0.202746	0.0117039	0.417142	0.0285095	0.841951	0.99985	0.0312131	0.452777	0.999761	0.320937	0.999758	0.999827	0.99983	0.000169292	0.999832	0.0417014	0.999851	9.36078e-05
chr3L	366	21352014	21499437	0.999803	0.992324	0.999393	0.00133528	0.999895	0.0711311	0.00015975	0.000285849	0.000208641	0.0923895	0.99979	0.000822769	0.780608	0.8952	0.195508	0.00291855	0.388534	0.0270866	0.763271	0.999819	0.0271779	0.371214	0.999755	0.332364	0.999721	0.999763	0.999796	7.68556e-05	0.999783	0.0309678	0.999672	6.06153e-05
chr3L	367	21499438	21664018	0.999896	0.991466	0.999624	0.00144675	0.999842	0.0707194	6.26677e-05	0.000708477	0.000628978	0.0908471	0.999884	0.00331142	0.767053	0.889509	0.199096	0.000836146	0.350017	0.0168783	0.506661	0.999894	0.0165669	0.28365	0.999858	0.387094	0.999803	0.999823	0.999877	0.000135055	0.99984	0.009169	0.999158	7.83923e-05
chr3L	368	21664019	21833528	0.999894	0.990202	0.999546	0.000336726	0.999542	0.0610493	0.000101646	0.00203628	0.00068639	0.0758438	0.999864	0.0117101	0.713356	0.881318	0.209808	0.000367113	0.317948	0.00299946	0.46405	0.999872	0.00496169	0.0827256	0.99983	0.414244	0.999682	0.999713	0.999832	5.00326e-05	0.999697	0.00500629	0.997275	4.93502e-05
chr3L	369	21833529	21987061	0.999803	0.987179	0.998982	0.000213116	0.99849	0.062588	0.000151507	0.00331821	0.00108474	0.0292421	0.999776	0.0136394	0.624012	0.84518	0.226999	0.000546964	0.305519	0.000630222	0.300581	0.999775	0.00326916	0.018395	0.999709	0.577852	0.999215	0.999221	0.999685	5.31721e-05	0.99906	0.00159157	0.995445	3.93986e-05
chr3L	370	21987062	22130848	0.999657	0.985663	0.996652	0.000523503	0.997249	0.0828841	0.00016997	0.00482413	0.00265479	0.0214719	0.999402	0.0145896	0.610548	0.838129	0.319676	0.000192318	0.268713	0.000251668	0.203989	0.999439	0.000688179	0.00375025	0.999607	0.7897	0.998198	0.99834	0.999174	4.33907e-05	0.99963	0.000491688	0.996748	5.65856e-05
chr3L	371	22130849	22282920	0.999803	0.984823	0.996991	0.000797769	0.996472	0.155143	0.000176504	0.0065163	0.0123831	0.020261	0.999744	0.0161815	0.6159	0.836991	0.710199	0.000236616	0.266258	6.26727e-05	0.129334	0.9998	0.000293572	0.00147071	0.99978	0.917451	0.999103	0.99913	0.999646	9.72524e-05	0.999817	0.000427412	0.999135	0.000183186
chr3L	372	22282921	22418668	0.999895	0.980843	0.996399	0.00211191	0.998618	0.241101	0.000595569	0.0111614	0.0608282	0.0203922	0.999866	0.0234001	0.6244	0.856735	0.895095	0.000106266	0.265843	3.2842e-05	0.0667891	0.999909	0.000351539	0.000625366	0.999891	0.97577	0.999663	0.999644	0.999799	0.000468611	0.999909	0.000127376	0.999742	8.6633e-05
chr3L	373	22418669	22565751	0.99989	0.98237	0.997269	0.00361957	0.999589	0.370783	0.00244718	0.0173844	0.191021	0.0233826	0.999909	0.032158	0.645275	0.880828	0.957577	0.000212454	0.277527	4.406e-05	0.0485248	0.999933	0.000942065	0.000501417	0.999883	0.990588	0.999783	0.999785	0.999717	0.000499348	0.999909	4.91066e-05	0.999888	0.000162024
chr3L	374	22565752	22747333	0.99985	0.994482	0.998615	0.0115968	0.999797	0.514493	0.00509673	0.0490764	0.359428	0.0325845	0.99987	0.0636861	0.713583	0.938437	0.977212	0.000704016	0.318183	0.000128369	0.0468051	0.999912	0.00454993	0.000930586	0.999829	0.994403	0.999768	0.999787	0.99946	0.00114578	0.999883	6.90313e-05	0.999924	0.000376561
chr3L	375	22747334	22927844	0.999721	0.997311	0.998999	0.0257101	0.999855	0.54803	0.00680619	0.0578884	0.561625	0.0334517	0.999731	0.0749536	0.731939	0.951867	0.98379	0.00365441	0.498834	0.000171598	0.0518848	0.999829	0.00547344	0.00379283	0.999657	0.995535	0.999603	0.999649	0.999602	0.00167279	0.999744	4.59976e-05	0.999897	0.000429778
chr3L	376	22927845	23107644	0.999709	0.998165	0.999268	0.0298032	0.999747	0.554676	0.014123	0.0765238	0.803371	0.04244	0.999668	0.088446	0.736532	0.954929	0.988957	0.00481936	0.548681	0.000476831	0.0523844	0.999853	0.00491768	0.00624748	0.99959	0.996443	0.999535	0.999617	0.999753	0.00225278	0.999687	9.31915e-05	0.999866	0.00133758
chr3L	377	23107645	23413852	0.999694	0.998068	0.999288	0.0344539	0.999484	0.547012	0.0193488	0.0797405	0.862611	0.0437695	0.999458	0.098121	0.72827	0.951582	0.992256	0.0128693	0.5599	0.00235542	0.0581935	0.999817	0.0074783	0.0130788	0.999366	0.996625	0.999323	0.999458	0.99974	0.00292474	0.999516	0.000286453	0.999764	0.00235379
chr3L	378	23413853	23694604	0.999414	0.997708	0.998631	0.039483	0.998397	0.504605	0.0193601	0.0771952	0.875867	0.0378774	0.998655	0.0996611	0.688086	0.933718	0.992962	0.0637904	0.603874	0.0129646	0.0961938	0.999573	0.0246027	0.0433472	0.998531	0.995499	0.998339	0.998596	0.999447	0.00449992	0.998649	0.0015645	0.99925	0.00403265
chr3L	379	23694605	24004627	0.998145	0.997253	0.996823	0.045539	0.995545	0.433654	0.0271638	0.069476	0.880316	0.0398214	0.995147	0.123381	0.684267	0.93312	0.991147	0.101911	0.625463	0.0226483	0.107073	0.998772	0.128066	0.0658965	0.994858	0.990144	0.994095	0.995034	0.998815	0.00644366	0.995089	0.00152733	0.997536	0.00589853
chr3L	380	24004628	24543556	0.994803	0.994687	0.992505	0.0498135	0.991902	0.408209	0.0670364	0.0728828	0.882814	0.0476116	0.988204	0.137077	0.669784	0.9336	0.986614	0.110584	0.627847	0.0263148	0.106185	0.995356	0.15642	0.0736035	0.990074	0.982559	0.986533	0.987213	0.996101	0.0144877	0.987946	0.00303169	0.993857	0.0147643

## Sheet: 3R
chr	window	start	stop	CK2	CO13N	CO9N	RC5	RG13N	RG37N	RG39	RG6N	RG8	SP173	SP188	SP221	SP235	SP241	SP80	CO10b.3	CO16.3	CO8b.3	ED19.1.3	EZ63.1.3	GA187	GU11.3	GU3.3	KN73.1.3	KO10.1.3	KO2.1.3	KO6.1.3	KR54.1.3	KR68.1.3	UG17.3	UG40.3	ZK131	ZK186
chr3R	0	0	418468	0.991496	0.796261	0.981415	0.00488935	0.040017	0.613099	0.00401463	0.0026569	0.0025504	0.0165486	0.996185	0.0549195	0.494968	0.0462486	0.933828	0.019937	0.158696	0.0316095	0.0199698	0.991443	0.0543214	0.0913687	0.99667	0.996	0.995002	0.994876	0.993696	0.75185	0.995008	0.00258918	0.990555	0.00258856	0.990197
chr3R	1	418469	651959	0.995683	0.797849	0.985565	0.00297772	0.0290578	0.621498	0.0020302	0.000625788	0.000553697	0.014987	0.998533	0.0539198	0.503711	0.0426439	0.939345	0.0122447	0.145662	0.0254372	0.0162173	0.995628	0.04865	0.0865142	0.99904	0.998927	0.998032	0.997577	0.997128	0.779621	0.997899	0.000565868	0.996599	0.000565207	0.996951
chr3R	2	651960	859702	0.997827	0.81166	0.99527	0.00205824	0.0228215	0.641242	0.00114581	0.000192253	0.000157319	0.0173984	0.99957	0.0620889	0.55428	0.0452325	0.944866	0.00945265	0.130169	0.0221271	0.0101487	0.998238	0.0475864	0.0813086	0.999698	0.999577	0.999354	0.999299	0.998784	0.918865	0.999425	0.000154862	0.998965	0.00015704	0.999144
chr3R	3	859703	1040457	0.998296	0.825664	0.99868	0.00190339	0.0199771	0.692333	0.000639064	6.64154e-05	8.09773e-05	0.0274804	0.999867	0.101762	0.61663	0.062936	0.945332	0.00280285	0.0805054	0.00483184	0.0052347	0.999528	0.0361677	0.0544706	0.999887	0.99971	0.999792	0.999778	0.999683	0.978484	0.999825	7.00127e-05	0.999495	7.18205e-05	0.999726
chr3R	4	1040458	1240410	0.999431	0.831492	0.999429	0.0031784	0.0201365	0.775075	0.000806554	4.06435e-05	6.36696e-05	0.0746621	0.999928	0.165627	0.693436	0.126544	0.95568	0.00152548	0.070953	0.00130439	0.00398627	0.999802	0.0130642	0.0146101	0.999941	0.999532	0.999898	0.999907	0.999881	0.994026	0.999917	5.01097e-05	0.999433	8.82752e-05	0.999872
chr3R	5	1240411	1480303	0.99978	0.84188	0.999462	0.00440816	0.024575	0.866053	0.00158135	3.54944e-05	0.000114554	0.175431	0.999927	0.330026	0.891616	0.343619	0.983483	0.000344529	0.0718693	0.000374199	0.00391152	0.999795	0.0040614	0.00501977	0.999945	0.998603	0.999902	0.999911	0.9999	0.997661	0.999912	7.77392e-05	0.999688	5.43863e-05	0.999931
chr3R	6	1480304	1713119	0.999858	0.864084	0.999516	0.00426543	0.0286921	0.893762	0.0016969	3.54229e-05	0.000362075	0.21819	0.999874	0.430048	0.960958	0.491038	0.992536	0.00010657	0.085004	0.000235784	0.00555632	0.999641	0.00218707	0.0029598	0.999936	0.994672	0.999851	0.999895	0.999879	0.998674	0.999872	4.63359e-05	0.999731	7.85716e-05	0.999919
chr3R	7	1713120	1870203	0.999899	0.870001	0.999084	0.0014617	0.0273139	0.900468	0.000396328	4.02131e-05	0.000141835	0.227901	0.999919	0.451583	0.980434	0.535679	0.997636	8.80459e-05	0.127416	9.87523e-05	0.0060822	0.999345	0.000849806	0.00292668	0.999938	0.985566	0.999893	0.999919	0.999918	0.998676	0.999897	5.32929e-05	0.999433	4.3641e-05	0.99988
chr3R	8	1870204	2056642	0.999826	0.884008	0.999658	0.0010061	0.0305954	0.902342	0.000132857	5.47776e-05	0.000166053	0.237195	0.999928	0.53719	0.993758	0.613093	0.99927	6.4192e-05	0.316692	5.96573e-05	0.0078923	0.998155	0.000260856	0.00510429	0.999933	0.982898	0.999931	0.999898	0.999918	0.998014	0.999802	0.000120136	0.999712	4.10211e-05	0.999914
chr3R	9	2056643	2269999	0.999441	0.889658	0.999765	0.000510941	0.0478967	0.899457	7.7146e-05	7.81681e-05	0.000511771	0.278166	0.999892	0.562671	0.996736	0.637568	0.999755	4.85964e-05	0.413011	8.88948e-05	0.00894063	0.995574	0.000189496	0.00981507	0.999924	0.985064	0.999927	0.999902	0.99992	0.998074	0.99984	0.000302331	0.999738	5.93809e-05	0.999933
chr3R	10	2270000	2406412	0.997907	0.885576	0.999675	0.000392224	0.127381	0.902405	0.000127071	4.29863e-05	0.000304047	0.462172	0.999889	0.641517	0.998041	0.702601	0.999872	7.37042e-05	0.858783	0.00019919	0.0161096	0.987115	0.000443554	0.0297986	0.999827	0.992586	0.999838	0.999898	0.999877	0.998207	0.999885	0.000497604	0.999885	6.14753e-05	0.999927
chr3R	11	2406413	2534200	0.998194	0.892382	0.999121	0.000140546	0.429112	0.925551	0.000442063	3.85069e-05	0.000255363	0.641786	0.999839	0.658357	0.998603	0.898282	0.999913	6.48067e-05	0.961061	0.000358934	0.0175337	0.96139	0.000171394	0.0724334	0.99981	0.995188	0.999824	0.999899	0.999888	0.999354	0.999902	0.00116269	0.999926	4.22055e-05	0.999917
chr3R	12	2534201	2660980	0.997417	0.896185	0.996746	9.67385e-05	0.526436	0.930488	0.000334897	5.14151e-05	0.000182693	0.681859	0.999827	0.659435	0.998327	0.945022	0.999866	0.000137495	0.984414	0.00131267	0.0183425	0.863837	0.000185001	0.269659	0.99981	0.996232	0.999789	0.999865	0.99985	0.999616	0.99987	0.00131467	0.999919	3.80875e-05	0.999844
chr3R	13	2660981	2799529	0.996167	0.891047	0.986246	0.00019602	0.547634	0.929273	0.000181528	8.60323e-05	9.92668e-05	0.688853	0.999903	0.660617	0.997539	0.956	0.999912	0.000229996	0.99015	0.00231364	0.0188875	0.707832	0.000208645	0.327369	0.999881	0.996786	0.999818	0.999923	0.999899	0.99986	0.999932	0.000976514	0.999945	3.7685e-05	0.999864
chr3R	14	2799530	2956749	0.992713	0.872891	0.939918	8.44668e-05	0.617228	0.9383	9.73382e-05	0.000124769	6.20731e-05	0.710332	0.999909	0.664158	0.998113	0.969217	0.999902	0.000417356	0.991455	0.00292797	0.0185596	0.231079	0.000146234	0.352638	0.999893	0.996204	0.999835	0.99994	0.999911	0.9999	0.999948	0.00116548	0.999943	3.98805e-05	0.999867
chr3R	15	2956750	3128407	0.991398	0.864595	0.86403	9.78147e-05	0.698041	0.947542	5.75311e-05	9.7027e-05	4.81617e-05	0.735957	0.999813	0.697341	0.999234	0.982626	0.999857	0.000299033	0.991273	0.00213692	0.0180466	0.134177	0.000103951	0.354992	0.999864	0.993156	0.999886	0.999947	0.999924	0.999867	0.999951	0.00125469	0.999937	5.07712e-05	0.999878
chr3R	16	3128408	3237750	0.99199	0.858743	0.820191	0.00030647	0.892084	0.98106	9.72707e-05	0.00014736	6.38178e-05	0.803631	0.999724	0.837659	0.999473	0.985297	0.999817	0.000379628	0.9913	0.00212276	0.0215772	0.108976	0.000176509	0.340695	0.999836	0.981241	0.999862	0.99992	0.999909	0.999755	0.999952	0.00282956	0.999926	5.27588e-05	0.999911
chr3R	17	3237751	3342607	0.991546	0.847622	0.625096	0.000312488	0.936353	0.991954	0.000325594	0.00051035	6.14723e-05	0.81826	0.999702	0.878768	0.999581	0.984639	0.999851	0.000158047	0.988321	0.000825639	0.0230135	0.0713984	0.000107547	0.306293	0.999889	0.979376	0.999887	0.99995	0.999935	0.999675	0.99994	0.00466867	0.999915	4.22296e-05	0.999941
chr3R	18	3342608	3444961	0.995252	0.849979	0.581764	0.000792218	0.946027	0.995718	0.000206846	0.000167987	6.17673e-05	0.823763	0.99944	0.914383	0.999786	0.981536	0.999723	0.000200774	0.989146	0.000711365	0.0276101	0.0338022	0.000198833	0.289533	0.999803	0.980537	0.999823	0.999952	0.999907	0.999073	0.999886	0.0062528	0.999904	5.57393e-05	0.999921
chr3R	19	3444962	3584641	0.996969	0.840461	0.470994	0.00114992	0.94763	0.997703	9.60135e-05	7.10016e-05	8.62452e-05	0.823035	0.999117	0.923662	0.999915	0.969631	0.999657	0.000236706	0.987923	0.000379285	0.026261	0.0118859	0.000246677	0.228813	0.999784	0.980081	0.999835	0.999951	0.999928	0.998232	0.999933	0.00514827	0.999907	4.68613e-05	0.999933
chr3R	20	3584642	3735228	0.998417	0.811542	0.329322	0.00130402	0.943957	0.997895	0.00011915	6.42353e-05	0.000239325	0.822471	0.998214	0.949377	0.999933	0.94166	0.999402	0.000141339	0.984839	0.000536319	0.0187945	0.00333972	0.000310274	0.203943	0.999767	0.975565	0.999829	0.999934	0.99992	0.996282	0.99994	0.00627595	0.999943	7.79489e-05	0.999932
chr3R	21	3735229	3897634	0.999362	0.688931	0.165365	0.00291254	0.929043	0.997082	0.000183305	7.27791e-05	0.000111548	0.814467	0.996965	0.975384	0.999889	0.927779	0.998899	0.000287806	0.984369	0.000478185	0.0151756	0.00178338	0.000314047	0.195596	0.999753	0.976789	0.999805	0.999877	0.999865	0.989829	0.999897	0.0084361	0.999938	4.36603e-05	0.999874
chr3R	22	3897635	4052779	0.999706	0.617884	0.122371	0.0105448	0.917583	0.993511	0.000631646	0.000176455	5.3927e-05	0.796624	0.994599	0.992021	0.999663	0.894727	0.998235	0.000231732	0.983723	0.000145944	0.00667659	0.000982682	0.000198212	0.181894	0.999792	0.978128	0.999846	0.999891	0.999893	0.979611	0.999888	0.00743531	0.999932	3.86612e-05	0.99988
chr3R	23	4052780	4200964	0.999733	0.591014	0.111649	0.0135936	0.907016	0.991323	0.00250607	0.000115884	5.28597e-05	0.797238	0.985938	0.99747	0.99882	0.887987	0.996903	0.000101079	0.985034	9.06463e-05	0.00229037	0.00111627	0.000408661	0.168128	0.999879	0.990408	0.999794	0.999928	0.999918	0.960988	0.999877	0.00345702	0.999934	3.89385e-05	0.999874
chr3R	24	4200965	4322615	0.99988	0.506423	0.105048	0.0124814	0.882479	0.980816	0.00334738	0.00023259	0.000108594	0.782022	0.950006	0.998735	0.995285	0.858136	0.99692	0.000127412	0.989329	0.000174881	0.00144297	0.00143524	0.00092808	0.167008	0.999903	0.99671	0.999834	0.999943	0.99993	0.879266	0.999801	0.00242218	0.999934	4.75864e-05	0.999831
chr3R	25	4322616	4453076	0.999865	0.45416	0.109214	0.00979125	0.860871	0.964083	0.00398598	0.000145308	0.00027053	0.756783	0.93903	0.999578	0.991952	0.828431	0.998995	0.000175473	0.995082	0.000204752	0.00121232	0.000685022	0.00172963	0.179233	0.999898	0.998712	0.999897	0.999935	0.999927	0.6946	0.999922	0.00095208	0.999943	6.97653e-05	0.999867
chr3R	26	4453077	4599854	0.999858	0.402096	0.103458	0.00741849	0.768776	0.907034	0.00822412	0.000199406	0.000279152	0.642325	0.898457	0.9998	0.978607	0.765569	0.999682	0.000523659	0.997529	0.000268584	0.00207296	0.0005679	0.0024328	0.234013	0.999905	0.999324	0.999883	0.999909	0.999898	0.284716	0.999942	0.000335224	0.999937	5.32045e-05	0.99991
chr3R	27	4599855	4715760	0.999906	0.200685	0.0723919	0.00168852	0.50535	0.76015	0.00917245	0.000247156	8.5248e-05	0.528396	0.784002	0.999862	0.920124	0.548357	0.999803	0.00110354	0.998792	0.000473628	0.00270195	0.000680365	0.00432532	0.398639	0.999904	0.999688	0.999893	0.999929	0.999911	0.200186	0.999947	0.000237757	0.999917	9.21998e-05	0.999893
chr3R	28	4715761	4860444	0.999926	0.0835396	0.0664158	0.000399075	0.238358	0.635235	0.0102414	8.6123e-05	4.57079e-05	0.409977	0.370621	0.99984	0.908931	0.413516	0.999725	0.00185758	0.999238	0.00101672	0.00323976	0.00181755	0.00987088	0.476877	0.999941	0.999778	0.999862	0.999919	0.9999	0.115882	0.999944	0.000378119	0.99994	4.53857e-05	0.999903
chr3R	29	4860445	4971104	0.999938	0.049277	0.0673765	0.0001468	0.185009	0.611086	0.00798728	8.50758e-05	4.21443e-05	0.378995	0.271142	0.999711	0.908226	0.366596	0.999408	0.00589521	0.999011	0.00155107	0.00299631	0.00148467	0.0139446	0.504587	0.999939	0.999912	0.999858	0.999939	0.99992	0.0317699	0.999944	0.00119882	0.999943	3.66908e-05	0.999876
chr3R	30	4971105	5070483	0.999937	0.0374661	0.0696676	0.000156038	0.131532	0.571567	0.00541617	0.000133847	6.37027e-05	0.328625	0.171568	0.999186	0.907688	0.290969	0.998257	0.00743452	0.997709	0.00246201	0.00473744	0.00149019	0.0162888	0.560057	0.999934	0.999935	0.999866	0.999953	0.999927	0.0157737	0.999943	0.00167727	0.999943	3.75513e-05	0.999909
chr3R	31	5070484	5174688	0.99991	0.0317183	0.0872317	8.3372e-05	0.0892332	0.537681	0.00297984	9.08622e-05	3.91612e-05	0.247513	0.071861	0.99711	0.911488	0.16959	0.993858	0.00726111	0.992392	0.00190617	0.0130005	0.00282113	0.0184496	0.585801	0.999925	0.999919	0.999852	0.999944	0.999908	0.00696919	0.999936	0.00104073	0.999917	4.96026e-05	0.999903
chr3R	32	5174689	5318850	0.999924	0.0123875	0.16754	0.000131516	0.067755	0.413074	0.00119214	5.78154e-05	3.46251e-05	0.186415	0.0498315	0.990641	0.927245	0.135737	0.978246	0.00684475	0.973182	0.00124674	0.0151384	0.00472017	0.0173806	0.587866	0.999913	0.99989	0.99992	0.999931	0.999793	0.00297774	0.99992	0.000739089	0.999915	0.000112736	0.999934
chr3R	33	5318851	5463815	0.999903	0.00329936	0.198258	0.000422703	0.0494006	0.285375	0.000582198	9.19607e-05	3.54205e-05	0.130675	0.0272801	0.970643	0.936822	0.0810408	0.910165	0.00526351	0.907955	0.00104818	0.0166332	0.00590939	0.0117905	0.579021	0.999843	0.999698	0.999938	0.999859	0.999255	0.00205445	0.999807	0.000560583	0.999846	0.000120143	0.999946
chr3R	34	5463816	5653693	0.999934	0.00145505	0.251498	0.000883616	0.0467358	0.261745	0.000651211	7.89983e-05	3.45705e-05	0.0739418	0.0202845	0.923966	0.946504	0.0343594	0.776763	0.00426049	0.877762	0.00140316	0.0186569	0.00880455	0.00861133	0.556885	0.999879	0.999618	0.999943	0.999931	0.999175	0.00228402	0.999923	0.00104432	0.999919	0.000319613	0.999931
chr3R	35	5653694	5785153	0.999923	0.000464045	0.266	0.000359668	0.0363063	0.15389	0.000387525	5.92139e-05	4.15433e-05	0.0636177	0.0119032	0.777806	0.963971	0.0244598	0.707386	0.00321059	0.864341	0.00144099	0.0204043	0.0103756	0.0052471	0.536943	0.999883	0.999644	0.999933	0.999944	0.998107	0.00231045	0.999946	0.0022695	0.99994	0.000261601	0.999921
chr3R	36	5785154	5906957	0.999924	0.000261529	0.267833	0.000258189	0.0190532	0.0458935	0.000196155	0.000113584	4.71363e-05	0.0463281	0.00332272	0.30052	0.974848	0.00813682	0.643474	0.00286043	0.844113	0.00108295	0.0219695	0.01391	0.00201664	0.528488	0.999926	0.99928	0.999932	0.999949	0.994224	0.00337738	0.999948	0.00399136	0.999952	0.000224922	0.999942
chr3R	37	5906958	6006024	0.999875	0.000106392	0.252781	0.00053794	0.0128341	0.0174601	0.000272396	0.00021061	9.55619e-05	0.0442037	0.00145247	0.0845984	0.976936	0.0048524	0.594934	0.00256929	0.824113	0.00118207	0.0236544	0.0158547	0.000750763	0.524771	0.999922	0.9981	0.999869	0.999923	0.985204	0.00438747	0.999918	0.00853656	0.999942	0.000257081	0.999916
chr3R	38	6006025	6107473	0.999912	0.000104563	0.249044	0.000736094	0.0112745	0.011366	0.000131732	9.65544e-05	4.82962e-05	0.0417097	0.0013007	0.0397777	0.975934	0.00472096	0.587443	0.00191116	0.778677	0.00136302	0.0243368	0.0183846	0.000573883	0.503553	0.999879	0.996228	0.999899	0.999935	0.97205	0.00657354	0.999936	0.0162909	0.999944	0.00034053	0.999916
chr3R	39	6107474	6258791	0.999902	0.000226281	0.252319	0.000795666	0.0110922	0.0108461	0.000173948	5.16683e-05	4.92562e-05	0.0390287	0.00112141	0.0188033	0.970069	0.00461124	0.597341	0.00146702	0.661083	0.000963993	0.0276442	0.0296532	0.000195454	0.475876	0.999769	0.990417	0.999916	0.999936	0.967523	0.00881434	0.999936	0.0328936	0.999943	0.000254773	0.999856
chr3R	40	6258792	6355767	0.999922	0.000136696	0.253275	0.000637739	0.0106587	0.0114019	0.000528309	5.74475e-05	0.000101496	0.0368397	0.00128557	0.0128015	0.946348	0.00445861	0.594766	0.000675572	0.637718	0.001418	0.0254979	0.0310154	0.000127752	0.373076	0.999644	0.970237	0.999894	0.99992	0.963209	0.0089491	0.999906	0.0653555	0.999935	0.000513629	0.999855
chr3R	41	6355768	6474659	0.999931	0.000260777	0.274198	0.000469569	0.00999356	0.0117582	0.000666111	6.67921e-05	4.74583e-05	0.0320414	0.000898999	0.00797704	0.842221	0.00340747	0.573757	0.000295013	0.571345	0.000866034	0.0145506	0.0278706	0.00023277	0.171125	0.999133	0.908278	0.999937	0.999931	0.965141	0.00627312	0.999818	0.0746647	0.99994	0.000193243	0.999902
chr3R	42	6474660	6564614	0.999945	0.000900491	0.300925	0.000177112	0.00799414	0.0108751	0.000725166	5.2871e-05	3.77484e-05	0.0235522	0.000311483	0.00325014	0.795218	0.00122092	0.530977	0.000225677	0.50337	0.00110853	0.00817592	0.02618	0.000162569	0.0926209	0.998829	0.637406	0.999949	0.999936	0.968307	0.00251877	0.999716	0.0794681	0.999947	9.95312e-05	0.999932
chr3R	43	6564615	6669201	0.999948	0.00204696	0.308265	0.000172332	0.00705099	0.00880243	0.000500407	4.59803e-05	4.26193e-05	0.0148686	0.000251006	0.00211471	0.61756	0.000691366	0.369423	0.000428421	0.481652	0.00233734	0.00719846	0.0298788	0.000321283	0.0559323	0.999295	0.433321	0.999941	0.999943	0.97774	0.0016319	0.999393	0.103834	0.99994	5.48032e-05	0.999949
chr3R	44	6669202	6773651	0.99992	0.00393685	0.331949	0.000272777	0.00591481	0.00753665	0.000662366	6.59425e-05	6.63574e-05	0.00790741	0.000453041	0.00231926	0.4987	0.000585155	0.294004	0.000416951	0.419336	0.0030279	0.00700663	0.0346508	0.000277555	0.0267545	0.999788	0.329738	0.999918	0.999914	0.994482	0.0012361	0.998098	0.122568	0.999922	5.39898e-05	0.999946
chr3R	45	6773652	6851072	0.999944	0.00359094	0.336024	0.000461988	0.00152871	0.00343138	0.000358327	0.00016186	4.72615e-05	0.00618523	0.000154589	0.000646693	0.111779	0.000754496	0.145616	0.00104334	0.404291	0.00732312	0.0101867	0.0460214	0.000344124	0.0171179	0.999884	0.163711	0.999945	0.99994	0.998483	0.00120944	0.994871	0.129387	0.999932	6.21193e-05	0.99995
chr3R	46	6851073	6940833	0.999935	0.00516493	0.356492	0.000447306	0.000672348	0.00248706	0.000130257	0.000552953	3.93936e-05	0.00439971	0.000117484	0.000313362	0.031369	0.000711751	0.0836714	0.00117444	0.344999	0.00881218	0.00992869	0.0469163	0.000470225	0.0129194	0.999919	0.0964483	0.999953	0.999925	0.999598	0.000873706	0.993602	0.128137	0.999921	0.00011511	0.999956
chr3R	47	6940834	7009751	0.999937	0.0116994	0.387869	0.000228725	0.000642279	0.00280939	5.4087e-05	0.000404959	4.1093e-05	0.00241191	0.00027054	0.000451085	0.0140075	0.000465215	0.0707171	0.00110479	0.276251	0.00872762	0.00837704	0.0480353	0.000786002	0.0101746	0.999931	0.0456766	0.999941	0.999944	0.999844	0.000603188	0.994405	0.126763	0.9999	0.000143141	0.999949
chr3R	48	7009752	7133855	0.999943	0.0178732	0.398378	0.000354513	0.000273507	0.00266506	3.98686e-05	0.000158122	5.47545e-05	0.00213856	0.00022101	0.000374575	0.0100122	0.000481553	0.0227159	0.000544455	0.0984769	0.00657024	0.00252615	0.0442505	0.00033952	0.00358405	0.99995	0.0196962	0.999939	0.99995	0.999923	0.000353764	0.994617	0.126809	0.999869	0.000254119	0.999939
chr3R	49	7133856	7245116	0.999937	0.0393661	0.412508	0.000270694	0.000268739	0.00448408	4.68986e-05	0.000179932	0.000134425	0.00164699	0.000176841	0.000334771	0.00678635	0.000565697	0.0112967	0.000630824	0.0293129	0.00709306	0.00138461	0.040303	0.000148932	0.00190986	0.999941	0.0145574	0.999925	0.999932	0.999927	0.000561061	0.998386	0.139798	0.999926	0.00039826	0.999946
chr3R	50	7245117	7346481	0.999947	0.0536762	0.438548	0.000149565	0.000129828	0.00666737	9.71018e-05	7.5449e-05	6.53159e-05	0.000952006	0.000208957	0.000316875	0.0037682	0.000447704	0.00930039	0.000799755	0.013816	0.00624684	0.000875482	0.0271732	6.88491e-05	0.000703764	0.999952	0.00924423	0.999904	0.999953	0.999949	0.000325182	0.999474	0.139313	0.999937	0.000134851	0.999955
chr3R	51	7346482	7457913	0.999949	0.0856381	0.484347	0.000164396	0.0002145	0.0174472	0.000106898	7.0762e-05	6.46485e-05	0.00113056	0.000276248	0.000386587	0.00264544	0.000593948	0.00726739	0.00171797	0.0110084	0.00749467	0.00115713	0.0250993	8.2777e-05	0.000530312	0.999948	0.00698928	0.999937	0.999956	0.999943	0.000239017	0.999694	0.144366	0.999891	0.000105329	0.999948
chr3R	52	7457914	7556604	0.999945	0.116662	0.504007	0.000153849	0.000751076	0.0558374	0.000301046	4.854e-05	8.01508e-05	0.00162217	0.000208775	0.000252375	0.00125678	0.000300422	0.00518987	0.00216797	0.010369	0.00681371	0.000762566	0.0175968	7.27148e-05	0.000688911	0.99995	0.00274647	0.999914	0.999955	0.999892	0.000232659	0.999714	0.161124	0.999889	7.64829e-05	0.999947
chr3R	53	7556605	7685066	0.999951	0.135102	0.514735	0.000111332	0.000321809	0.0671195	0.000204276	5.94659e-05	5.4529e-05	0.000937906	0.000177809	0.000482994	0.000623902	0.000424072	0.00291971	0.00217713	0.0100198	0.005939	0.00115885	0.0115785	6.6255e-05	0.00139014	0.999954	0.00198414	0.999933	0.999936	0.9999	0.000530881	0.999885	0.227162	0.999866	9.70974e-05	0.999943
chr3R	54	7685067	7770342	0.999955	0.145576	0.519215	0.000166746	0.000345788	0.123714	0.000169091	4.58237e-05	5.73132e-05	0.00104057	0.000472615	0.000491973	0.000385174	0.000368229	0.00178673	0.00250746	0.00966094	0.00481829	0.00078888	0.007533	0.000128872	0.0018649	0.999941	0.000988326	0.999928	0.99992	0.999935	0.000305118	0.999926	0.356511	0.999761	0.000209608	0.999944
chr3R	55	7770343	7878704	0.999952	0.161939	0.519671	9.21697e-05	0.000526999	0.360643	0.000414121	6.97148e-05	0.000125848	0.00113697	0.000565244	0.000285991	0.000411397	0.000345765	0.000585038	0.00212938	0.00826452	0.00299862	0.000281931	0.00368815	0.000113913	0.00236868	0.999905	0.000221273	0.999913	0.999869	0.999935	0.000496438	0.999899	0.744029	0.999862	7.55456e-05	0.999933
chr3R	56	7878705	7962656	0.999953	0.169006	0.509314	0.000131334	0.00130476	0.659508	0.000118269	4.1463e-05	0.000360358	0.00176913	0.000263265	0.000283176	0.000818385	0.000375989	0.000165286	0.00262253	0.00967934	0.00238567	0.000256096	0.00225419	0.000269204	0.00352942	0.999925	8.05468e-05	0.999938	0.999906	0.999946	0.00111016	0.999922	0.894533	0.999908	6.14166e-05	0.999886
chr3R	57	7962657	8047840	0.999953	0.166617	0.467782	0.000186187	0.000908359	0.731011	5.47023e-05	3.88649e-05	0.000100317	0.00217391	0.000149557	0.000200405	0.000333016	0.00029484	8.12327e-05	0.00220344	0.00804211	0.0023691	0.000589293	0.00241081	0.000419527	0.00295972	0.999942	5.5905e-05	0.999937	0.999929	0.999942	0.00122434	0.999939	0.943132	0.999881	0.000127727	0.999881
chr3R	58	8047841	8129922	0.999955	0.156266	0.461984	0.00061913	0.000379467	0.800895	4.32279e-05	5.47857e-05	5.15325e-05	0.00237549	0.000100335	0.000118071	0.000322876	9.77733e-05	0.000116282	0.00211777	0.00553126	0.00190087	0.00059139	0.00165762	0.000405009	0.00230425	0.999951	9.09024e-05	0.999904	0.999911	0.999916	0.000960333	0.999936	0.95635	0.999757	0.000203749	0.999918
chr3R	59	8129923	8212266	0.999949	0.121128	0.424531	0.00135994	0.000383407	0.816781	4.90565e-05	3.89239e-05	4.05107e-05	0.00107599	0.000178308	0.000193209	9.96227e-05	8.04429e-05	0.000125426	0.00143985	0.0043829	0.000771471	0.000183781	0.000705902	0.000123662	0.000717337	0.999945	7.17117e-05	0.999939	0.999941	0.999942	0.000302086	0.999945	0.988914	0.999151	7.69652e-05	0.999909
chr3R	60	8212267	8383781	0.999936	0.0932777	0.376314	0.000915904	0.000493689	0.899505	8.8375e-05	3.1712e-05	3.58198e-05	0.000300061	0.000280756	0.000239055	6.33911e-05	4.94e-05	0.000152745	0.000531927	0.00298795	0.000323376	6.9159e-05	0.000218211	6.97714e-05	0.000251774	0.999945	0.000156712	0.999952	0.999949	0.999945	0.000227181	0.999927	0.996276	0.996616	5.32601e-05	0.999916
chr3R	61	8383782	8464990	0.999891	0.0608025	0.268361	0.000342231	0.000289188	0.971158	5.34076e-05	3.10613e-05	3.71467e-05	0.000172201	0.000210816	8.22241e-05	8.80773e-05	4.73155e-05	7.71977e-05	0.000455416	0.00301229	0.000331608	4.677e-05	0.000145423	5.70143e-05	0.000225712	0.999928	0.000595336	0.999953	0.999935	0.999919	0.00034634	0.99984	0.997876	0.991751	8.16709e-05	0.999907
chr3R	62	8464991	8562817	0.999839	0.0273474	0.196118	0.000329979	0.000235822	0.988267	5.65252e-05	3.47425e-05	4.18587e-05	9.36452e-05	0.000168511	4.49597e-05	5.61432e-05	7.03947e-05	7.59321e-05	0.000176929	0.00378373	0.000337743	4.65831e-05	9.38531e-05	3.99244e-05	0.000348637	0.999913	0.00184708	0.999943	0.999902	0.999854	0.000350231	0.999827	0.998379	0.979216	4.79865e-05	0.999887
chr3R	63	8562818	8638471	0.999863	0.0202384	0.17554	0.000446998	0.000231935	0.993223	0.000127561	3.48463e-05	7.06582e-05	0.000140974	0.000104614	4.1542e-05	6.96953e-05	8.56365e-05	0.000124679	0.000176476	0.00753129	0.000838429	8.72855e-05	9.51068e-05	4.17662e-05	0.00110177	0.999938	0.00303487	0.999938	0.999936	0.999824	0.000738761	0.999913	0.998349	0.96334	4.70359e-05	0.999923
chr3R	64	8638472	8721034	0.999778	0.0155353	0.131062	0.000353757	0.000574505	0.99552	0.000135503	4.15165e-05	6.19898e-05	0.000290487	0.000184903	5.3471e-05	5.51335e-05	9.21132e-05	6.04296e-05	0.000155492	0.00796933	0.00103635	9.50694e-05	7.00044e-05	5.30988e-05	0.00208877	0.99995	0.00241516	0.999891	0.999921	0.999608	0.000640164	0.99994	0.997137	0.893502	8.38969e-05	0.999934
chr3R	65	8721035	8828957	0.999528	0.0146446	0.121257	0.000152575	0.00176042	0.996074	5.36854e-05	8.77041e-05	4.14269e-05	0.000309063	0.000194802	0.00012491	8.9523e-05	4.59701e-05	5.99362e-05	0.00022158	0.0056578	0.00101485	0.000246018	0.00011963	7.23159e-05	0.0020909	0.999945	0.00126692	0.999738	0.999897	0.999757	0.000798569	0.99992	0.997595	0.822121	4.43289e-05	0.999915
chr3R	66	8828958	8912813	0.999782	0.00787736	0.0805355	0.000218283	0.00142564	0.994818	3.71827e-05	0.000201396	3.64545e-05	0.000124984	0.000280042	5.63484e-05	6.85535e-05	4.00887e-05	0.000113183	0.000205362	0.0056917	0.000939871	0.000185293	0.000147459	0.00018201	0.00263396	0.99993	0.00112736	0.999438	0.999858	0.999709	0.000731111	0.99983	0.998988	0.809614	3.64551e-05	0.999864
chr3R	67	8912814	8999468	0.999834	0.00327032	0.0532654	0.000200754	0.000656649	0.991182	3.36973e-05	0.000759564	4.28203e-05	6.12169e-05	0.000111769	4.42652e-05	0.000137112	3.92488e-05	0.000160272	0.000145253	0.00660655	0.00066384	0.00011327	0.000105907	8.88202e-05	0.00308094	0.999918	0.00211996	0.999773	0.999782	0.999731	0.00114083	0.999588	0.99939	0.805781	3.93853e-05	0.999585
chr3R	68	8999469	9084384	0.999783	0.00108105	0.0374732	0.000154634	0.000211982	0.98101	3.32457e-05	0.00118308	3.2358e-05	7.38428e-05	6.95175e-05	3.75058e-05	9.7225e-05	5.72522e-05	6.31689e-05	7.61136e-05	0.00813838	0.000560109	5.54348e-05	5.16241e-05	5.0255e-05	0.00404376	0.999802	0.00681644	0.999777	0.99949	0.999484	0.00376112	0.998861	0.99926	0.80211	3.42125e-05	0.998764
chr3R	69	9084385	9160316	0.999728	0.000669858	0.0349468	6.27762e-05	0.000154657	0.976224	3.6487e-05	0.0017441	3.06826e-05	0.000203006	0.000115875	4.51553e-05	0.00019061	8.96284e-05	5.01706e-05	7.83828e-05	0.0134928	0.000721452	5.74274e-05	4.13103e-05	4.34566e-05	0.00921519	0.999572	0.0315053	0.999779	0.998999	0.998786	0.0166714	0.997217	0.999196	0.794799	3.36805e-05	0.997875
chr3R	70	9160317	9234147	0.99983	0.000394337	0.0365309	5.28589e-05	0.000122511	0.962347	5.37324e-05	0.00474143	3.20549e-05	0.000129362	0.000137056	4.35322e-05	0.000237441	6.66929e-05	8.62538e-05	0.000178194	0.0342051	0.00196516	0.000116207	5.56526e-05	3.85553e-05	0.0225376	0.999434	0.152453	0.999834	0.999078	0.998728	0.0706331	0.997079	0.999339	0.794799	3.55912e-05	0.998
chr3R	71	9234148	9307923	0.999895	0.000260251	0.0443288	9.86712e-05	7.10758e-05	0.91909	8.09438e-05	0.00836787	3.33642e-05	0.000181556	0.000115793	8.61095e-05	0.000251834	0.000128773	0.000138945	0.000655844	0.130094	0.00828844	0.00015057	0.000122379	4.75516e-05	0.0868299	0.999248	0.280553	0.999892	0.999639	0.999487	0.131061	0.998814	0.999672	0.813909	3.63511e-05	0.998552
chr3R	72	9307924	9384598	0.99994	0.000467217	0.0810606	0.00034903	0.000116381	0.823063	0.000230613	0.00934612	3.58759e-05	0.000514738	0.00028517	0.000191902	0.000551072	0.000397028	0.000453208	0.00287063	0.556519	0.0389095	0.000444297	0.000433293	8.18173e-05	0.379886	0.999784	0.766964	0.999919	0.99986	0.999799	0.3461	0.999631	0.999796	0.902493	3.6015e-05	0.999404
chr3R	73	9384599	9455696	0.999951	0.00157049	0.105722	0.000419437	9.05861e-05	0.421514	0.000177401	0.00779226	4.56502e-05	0.000419847	0.000250581	8.69315e-05	0.00063883	0.000454898	0.000560312	0.0034253	0.68757	0.0572963	0.000161864	0.000219928	0.000126191	0.446542	0.999897	0.902224	0.999934	0.999931	0.999868	0.617348	0.999856	0.999743	0.940334	4.32447e-05	0.999819
chr3R	74	9455697	9541578	0.999938	0.00414225	0.130327	0.000352563	7.23303e-05	0.334803	0.000415594	0.00740394	8.06109e-05	0.00011792	0.000583636	0.000100446	0.00162645	0.000378276	0.00110269	0.00613329	0.71663	0.0967867	0.000119522	0.000245998	9.10655e-05	0.47434	0.999921	0.938364	0.999937	0.999942	0.999801	0.705767	0.999916	0.99928	0.953322	8.30614e-05	0.999901
chr3R	75	9541579	9602581	0.999913	0.00538217	0.151328	0.000377023	4.90521e-05	0.141806	0.000167368	0.00635414	7.53148e-05	7.92495e-05	0.000699937	0.000238262	0.00544636	0.000482759	0.00144473	0.0186738	0.74875	0.135166	0.000264433	0.000677905	0.000103764	0.559878	0.999922	0.950926	0.999909	0.999943	0.999569	0.729949	0.999936	0.997448	0.955931	6.21373e-05	0.999907
chr3R	76	9602582	9660755	0.999931	0.0108867	0.256431	0.000220822	4.25515e-05	0.102615	0.000180654	0.00239068	0.000115057	0.000136449	0.00189403	0.000289922	0.0190307	0.00126089	0.00207692	0.0767238	0.780179	0.3248	0.000236461	0.000249689	0.000269842	0.578255	0.999918	0.955539	0.999876	0.999948	0.999194	0.74583	0.999904	0.99734	0.956513	9.96074e-05	0.999928
chr3R	77	9660756	9729348	0.999949	0.0118726	0.361869	0.000328494	5.15919e-05	0.0956628	0.00024551	0.000836408	0.00014818	0.000441209	0.00355043	0.000349725	0.0559513	0.00182086	0.00174458	0.204971	0.804606	0.473081	0.000329962	0.000228244	0.000591695	0.621147	0.999902	0.957687	0.999903	0.999951	0.999538	0.766508	0.999791	0.998027	0.964362	9.77258e-05	0.999928
chr3R	78	9729349	9777623	0.999949	0.0194766	0.594123	0.000611842	0.000120523	0.0955523	0.000171633	0.000530487	0.000147201	0.000879298	0.00939007	0.000472842	0.104803	0.00217748	0.00231684	0.588928	0.916245	0.694559	0.00100378	0.000537665	0.000583057	0.816169	0.999916	0.965518	0.999895	0.99995	0.999821	0.870187	0.99991	0.999472	0.989347	5.42675e-05	0.999915
chr3R	79	9777624	9839086	0.999955	0.0276643	0.827375	0.000678571	0.000431981	0.104823	0.000252317	0.000242082	0.000132833	0.00182303	0.0361426	0.00071788	0.127664	0.0024782	0.00394275	0.676547	0.973215	0.800081	0.000906604	0.000259732	0.000773476	0.915628	0.999932	0.96615	0.999916	0.99995	0.999906	0.940702	0.999927	0.999787	0.997003	7.26981e-05	0.999931
chr3R	80	9839087	9899071	0.999944	0.0649187	0.880575	0.000602441	0.000532571	0.126609	0.000358551	0.000227915	7.52025e-05	0.00255523	0.137667	0.000925202	0.136409	0.00287715	0.00794146	0.807642	0.986784	0.906162	0.00120807	0.000270199	0.00128923	0.954211	0.999894	0.966989	0.999892	0.999943	0.999902	0.970859	0.99988	0.999917	0.999126	0.000114227	0.999909
chr3R	81	9899072	9955271	0.999936	0.23236	0.939169	0.000314613	0.000562746	0.148243	0.000340202	8.40194e-05	6.473e-05	0.00257077	0.360982	0.000913793	0.14474	0.00255959	0.0233259	0.866594	0.990743	0.940711	0.00187931	0.000258871	0.00180833	0.966493	0.99992	0.965033	0.999928	0.999933	0.999824	0.980475	0.99963	0.999939	0.999667	9.94867e-05	0.999916
chr3R	82	9955272	10013129	0.99988	0.317527	0.965528	0.000114103	0.00108284	0.160716	0.000119522	5.73903e-05	0.000101948	0.00469975	0.838128	0.00188801	0.149237	0.00283279	0.0935451	0.889164	0.993429	0.975584	0.00235154	0.000483395	0.00198927	0.971386	0.999892	0.967552	0.999904	0.999919	0.999912	0.990329	0.99985	0.999913	0.99979	4.67108e-05	0.999886
chr3R	83	10013130	10081413	0.999924	0.344598	0.972273	9.55237e-05	0.000417702	0.164272	0.000111585	9.26667e-05	5.94388e-05	0.00436619	0.957853	0.00172687	0.145024	0.00236405	0.332964	0.896078	0.993847	0.985765	0.00122793	0.000492996	0.000934551	0.970501	0.999925	0.979394	0.999925	0.999943	0.999937	0.994232	0.999911	0.999906	0.999907	3.62932e-05	0.999914
[truncated: 304 more rows]
