# Supplementary material for: Population Genomics of Sub-Saharan Drosophila melanogaster: African Diversity and Non-African Admixture
Source: PLoS Genet. 2012 Dec 20;8(12):e1003080. doi: 10.1371/journal.pgen.1003080 (PMC3527209; doi:10.1371/journal.pgen.1003080)
Supplement: Table S7 — Admixture characteristics of African populations. Sample sizes before and after admixture filtering are given. The proportion of non-African admixture estimated for each population is shown, along with the average length of admixture tracts in centiMorgans. Finally, the estimated town population size is given. (XLS) [file pgen.1003080.s015.xls]

## Sheet: Sheet1
Population	Primary Core Genomes	Average Admixture Proportion	Approx. sample size after admixture filtering	Mean Admixture Tract Size (cM)	Human Population Size of Collection Locality
CK	1	0.152052	0.847948	1.56	100
CO	8	0.0396209	7.68303	1.23	15
ED	5	0.132763	4.33618	2.75	25
EZ	4	0.21536	3.13856	2.01	36
GA	9	0.256553	6.69102	4.78	43
GU	5	0.0511034	4.74448	1.18	2
KN	5	0.43055	2.84725	3.77	25
KR	4	0.272656	2.90937	2.93	8
KT	2	0.454345	1.09131	3.58	83
NG	6	0.209042	4.74575	5.64	100
RC	1	0.0210109	0.978989	0.62	20
RG	22	0.114188	19.4879	4.84	34
SP	1	0.164909	0.835091	1.27	100
TZ	3	0.0648418	2.80547	2.39	6
UG	4	0.06225	3.751	1.36	36
UM	3	0.358798	1.9236	4.96	39
ZI	4	0.0138302	3.94468	1	19
ZL	1	0.841122	0.158878	9.85	97
ZO	2	0.281747	1.43651	7.59	65
ZS	4	0.02556	3.89776	1.53	1
Table S7. Admixture characteristics of African populations. Sample sizes before and after admixture filtering are given.
The proportion of non-African admixture estimated for each population is shown, along with the average length of
admixture tracts in centiMorgans. Finally, the estimated town population size is given.
