# Supplementary material for: Population Genomics of Sub-Saharan Drosophila melanogaster: African Diversity and Non-African Admixture
Source: PLoS Genet. 2012 Dec 20;8(12):e1003080. doi: 10.1371/journal.pgen.1003080 (PMC3527209; doi:10.1371/journal.pgen.1003080)
Supplement: Table S11 — Dxy and FST between pairs of populations, for each major chromosome arm. Admixture-filtered data from genomes with <15% estimated admixture were analyzed for non-centromeric, non-telomeric regions. Results are presented in separate tabs for all sites, and for middles of short introns (see Materials and Methods). (XLS) [file pgen.1003080.s019.xls]

## Sheet: Legend
Table S11. Dxy and FST between pairs of populations, for each major chromosome arm.
Admixture-filtered data from genomes with <15% estimated admixture were analyzed for non-centromeric, non-telomeric regions.
Results are presented in separate tabs for all sites, and for middles of short introns (see methods).

## Sheet: ALL SITES
Dxy_X	CO	ED	FR	GA	GU	KR	NG	RG	TZ	UG	ZI	ZS		Fst_X	CO	ED	FR	GA	GU	KR	NG	RG	TZ	UG	ZI	ZS
CO	0.00608103	0.00647418	0.00653772	0.00637198	0.00623743	0.00661228	0.00619904	0.00667575	0.00681937	0.00652971	0.00719753	0.00700476		CO	0	0.141441	0.31937	0.0111375	0.00597155	0.0402139	0.00628268	0.0292245	0.226619	0.0125276	0.0739119	0.0904033
ED	0.00647418	0.00505178	0.00675609	0.00670161	0.00658806	0.00674582	0.00655818	0.00684356	0.00693796	0.00675588	0.0072474	0.00710681		ED	0.141441	0	0.418193	0.137644	0.138028	0.136543	0.140311	0.128371	0.312371	0.122699	0.151282	0.175875
FR	0.00653772	0.00675609	0.00280774	0.0065551	0.00662727	0.00632408	0.00657774	0.00689556	0.00680211	0.00680055	0.00715381	0.00702619		FR	0.31937	0.418193	0	0.286343	0.309477	0.252669	0.310683	0.296398	0.457501	0.290083	0.295807	0.325052
GA	0.00637198	0.00670161	0.0065551	0.00651808	0.0064791	0.00678199	0.00643984	0.00688553	0.00700463	0.00674668	0.00738101	0.00719903		GA	0.0111375	0.137644	0.286343	0	0.00936203	0.0322703	0.00955896	0.0269486	0.21431	0.0116213	0.0673467	0.0843928
GU	0.00623743	0.00658806	0.00662727	0.0064791	0.00631863	0.00672516	0.00630414	0.00679144	0.00692007	0.00664168	0.00731488	0.00711648		GU	0.00597155	0.138028	0.309477	0.00936203	0	0.0384303	0.00406178	0.0281684	0.219889	0.0113187	0.0725625	0.0879314
KR	0.00661228	0.00674582	0.00632408	0.00678199	0.00672516	0.00659624	0.00668933	0.00684133	0.00602908	0.00681916	0.00709411	0.00656052		KR	0.0402139	0.136543	0.252669	0.0322703	0.0384303	0	0.039181	0.0142479	0.0869373	0.0154797	0.0240441	-0.0151681
NG	0.00619904	0.00655818	0.00657774	0.00643984	0.00630414	0.00668933	0.00623991	0.00675429	0.00688674	0.00660641	0.00726712	0.00707983		NG	0.00628268	0.140311	0.310683	0.00955896	0.00406178	0.039181	0	0.0288031	0.222588	0.0120269	0.0720567	0.0890168
RG	0.00667575	0.00684356	0.00689556	0.00688553	0.00679144	0.00684133	0.00675429	0.00688941	0.00697275	0.0069099	0.00724508	0.00710845		RG	0.0292245	0.128371	0.296398	0.0269486	0.0281684	0.0142479	0.0288031	0	0.181962	0.00851047	0.0240739	0.0466126
TZ	0.00681937	0.00693796	0.00680211	0.00700463	0.00692007	0.00602908	0.00688674	0.00697275	0.00457524	0.00700907	0.00715353	0.00588761		TZ	0.226619	0.312371	0.457501	0.21431	0.219889	0.0869373	0.222588	0.181962	0	0.19287	0.170881	0.0565095
UG	0.00652971	0.00675588	0.00680055	0.00674668	0.00664168	0.00681916	0.00660641	0.0069099	0.00700907	0.0068177	0.00734151	0.00717494		UG	0.0125276	0.122699	0.290083	0.0116213	0.0113187	0.0154797	0.0120269	0.00851047	0.19287	0	0.0420305	0.0604873
ZI	0.00719753	0.0072474	0.00715381	0.00738101	0.00731488	0.00709411	0.00726712	0.00724508	0.00715353	0.00734151	0.00725008	0.00721881		ZI	0.0739119	0.151282	0.295807	0.0673467	0.0725625	0.0240441	0.0720567	0.0240739	0.170881	0.0420305	0	0.0354755
ZS	0.00700476	0.00710681	0.00702619	0.00719903	0.00711648	0.00656052	0.00707983	0.00710845	0.00588761	0.00717494	0.00721881	0.00667767		ZS	0.0904033	0.175875	0.325052	0.0843928	0.0879314	-0.0151681	0.0890168	0.0466126	0.0565095	0.0604873	0.0354755	0
Dxy_2L	CO	ED	FR	GA	GU	KR	NG	RG	TZ	UG	ZI	ZS		Fst_2L	CO	ED	FR	GA	GU	KR	NG	RG	TZ	UG	ZI	ZS
CO	0.00788521	0.00849636	0.00830585	0.00824515	0.00817756	0.00804101	0.00801176	0.00834516	0.00815066	0.008383	0.00940957	0.00902672		CO	0	0.137103	0.204325	0.0359725	0.0208989	0.151879	0.0600388	0.0413061	0.176541	0.0366326	0.0904684	0.0563436
ED	0.00849636	0.00682595	0.00843136	0.00865941	0.00856079	0.00840329	0.00850457	0.00852739	0.00848413	0.00855418	0.0094128	0.00912245		ED	0.137103	0	0.279133	0.144147	0.127972	0.251876	0.17825	0.12493	0.271899	0.118791	0.147086	0.125018
FR	0.00830585	0.00843136	0.0053489	0.0084273	0.00840485	0.008093	0.00824631	0.00844525	0.00825057	0.00844192	0.00919668	0.00890503		FR	0.204325	0.279133	0	0.2069	0.197662	0.312946	0.240075	0.202245	0.339378	0.192807	0.206464	0.184789
GA	0.00824515	0.00865941	0.0084273	0.00802585	0.00824217	0.007719	0.00766065	0.00845979	0.00783267	0.00856473	0.00956517	0.00905045		GA	0.0359725	0.144147	0.2069	0	0.0192458	0.105046	0.00547161	0.0454747	0.131863	0.0480848	0.0976497	0.0505404
GU	0.00817756	0.00856079	0.00840485	0.00824217	0.00814541	0.00802646	0.00799739	0.00843039	0.00810493	0.0084863	0.00948206	0.00907191		GU	0.0208989	0.127972	0.197662	0.0192458	0	0.133297	0.0415598	0.0352867	0.15547	0.0328228	0.0837204	0.0467012
KR	0.00804101	0.00840329	0.008093	0.007719	0.00802646	0.00583902	0.00731054	0.00802621	0.00596099	0.00830556	0.00927264	0.0083735		KR	0.151879	0.251876	0.312946	0.105046	0.133297	0	0.112771	0.134031	0.0380914	0.15394	0.187713	0.105938
NG	0.00801176	0.00850457	0.00824631	0.00766065	0.00799739	0.00731054	0.00720852	0.00830096	0.00743569	0.00843115	0.00942241	0.00886019		NG	0.0600388	0.17825	0.240075	0.00547161	0.0415598	0.112771	0	0.077773	0.140593	0.0829171	0.128112	0.0770153
RG	0.00834516	0.00852739	0.00844525	0.00845979	0.00843039	0.00802621	0.00830096	0.00813249	0.00804002	0.00828894	0.00929546	0.00892656		RG	0.0413061	0.12493	0.202245	0.0454747	0.0352867	0.134031	0.077773	0	0.148727	0.00991286	0.0653467	0.0313655
TZ	0.00815066	0.00848413	0.00825057	0.00783267	0.00810493	0.00596099	0.00743569	0.00804002	0.00556722	0.00840035	0.00932372	0.00830282		TZ	0.176541	0.271899	0.339378	0.131863	0.15547	0.0380914	0.140593	0.148727	0	0.176149	0.205603	0.112711
UG	0.008383	0.00855418	0.00844192	0.00856473	0.0084863	0.00830556	0.00843115	0.00828894	0.00840035	0.00827729	0.00939208	0.00907687		UG	0.0366326	0.118791	0.192807	0.0480848	0.0328228	0.15394	0.0829171	0.00991286	0.176149	0	0.066937	0.0391548
ZI	0.00940957	0.0094128	0.00919668	0.00956517	0.00948206	0.00927264	0.00942241	0.00929546	0.00932372	0.00939208	0.00925311	0.00925356		ZI	0.0904684	0.147086	0.206464	0.0976497	0.0837204	0.187713	0.128112	0.0653467	0.205603	0.066937	0	0.00491134
ZS	0.00902672	0.00912245	0.00890503	0.00905045	0.00907191	0.0083735	0.00886019	0.00892656	0.00830282	0.00907687	0.00925356	0.00916443		ZS	0.0563436	0.125018	0.184789	0.0505404	0.0467012	0.105938	0.0770153	0.0313655	0.112711	0.0391548	0.00491134	0
Dxy_2R	CO	ED	FR	GA	GU	KR	NG	RG	TZ	UG	ZI	ZS		Fst_2R	CO	ED	FR	GA	GU	KR	NG	RG	TZ	UG	ZI	ZS
CO	0.00712654	0.00783535	0.0077426	0.00761564	0.00747938	0.00780953	0.0074246	0.00771195	0.00802664	0.00767132	0.00822299	0.00796918		CO	0	0.147744	0.251559	0.0330783	0.0297767	0.0381333	0.0476707	0.0483393	0.0774974	0.0420542	0.0773137	0.0654579
ED	0.00783535	0.0062547	0.00784689	0.0080064	0.00789461	0.00797446	0.00783799	0.00789015	0.00811557	0.00786569	0.00829969	0.0080939		ED	0.147744	0	0.318912	0.137767	0.138706	0.120503	0.156462	0.127116	0.142751	0.123884	0.139389	0.134897
FR	0.0077426	0.00784689	0.00447778	0.00778975	0.0077796	0.00779689	0.00773689	0.00784763	0.00792251	0.00780372	0.00812568	0.00786876		FR	0.251559	0.318912	0	0.226656	0.239299	0.210069	0.260421	0.235299	0.231143	0.229693	0.229687	0.222199
GA	0.00761564	0.0080064	0.00778975	0.00760413	0.00772347	0.00801364	0.00766208	0.00789082	0.00817883	0.00786078	0.00837749	0.00812437		GA	0.0330783	0.137767	0.226656	0	0.0307219	0.0363238	0.0477033	0.0408766	0.0667062	0.0364203	0.0668948	0.0552849
GU	0.00747938	0.00789461	0.0077796	0.00772347	0.00738586	0.00790515	0.00746887	0.00780707	0.00812627	0.00777637	0.00830362	0.00805146		GU	0.0297767	0.138706	0.239299	0.0307219	0	0.0324878	0.0370233	0.0445675	0.0734109	0.0396399	0.0713428	0.0601746
KR	0.00780953	0.00797446	0.00779689	0.00801364	0.00790515	0.00781189	0.00754393	0.00770729	0.00780472	0.0078348	0.00801612	0.00754216		KR	0.0381333	0.120503	0.210069	0.0363238	0.0324878	0	0.00383135	-0.00163744	0.00676666	0.013395	0.00991037	-0.0444743
NG	0.0074246	0.00783799	0.00773689	0.00766208	0.00746887	0.00754393	0.00701116	0.00771468	0.00805467	0.00771798	0.00823072	0.00786217		NG	0.0476707	0.156462	0.260421	0.0477033	0.0370233	0.00383135	0	0.057515	0.0886348	0.0570463	0.0863018	0.061103
RG	0.00771195	0.00789015	0.00784763	0.00789082	0.00780707	0.00770729	0.00771468	0.00755323	0.00783366	0.00761984	0.0080597	0.0078101		RG	0.0483393	0.127116	0.235299	0.0408766	0.0445675	-0.00163744	0.057515	0	0.0275484	0.00815754	0.0324935	0.0195884
TZ	0.00802664	0.00811557	0.00792251	0.00817883	0.00812627	0.00780472	0.00805467	0.00783366	0.00768591	0.00793797	0.00793251	0.00771421		TZ	0.0774974	0.142751	0.231143	0.0667062	0.0734109	0.00676666	0.0886348	0.0275484	0	0.040209	0.00760116	-0.00299295
UG	0.00767132	0.00786569	0.00780372	0.00786078	0.00777637	0.0078348	0.00771798	0.00761984	0.00793797	0.00756458	0.00814556	0.00791615		UG	0.0420542	0.123884	0.229693	0.0364203	0.0396399	0.013395	0.0570463	0.00815754	0.040209	0	0.0418062	0.0316892
ZI	0.00822299	0.00829969	0.00812568	0.00837749	0.00830362	0.00801612	0.00823072	0.0080597	0.00793251	0.00814556	0.00805807	0.00791793		ZI	0.0773137	0.139389	0.229687	0.0668948	0.0713428	0.00991037	0.0863018	0.0324935	0.00760116	0.0418062	0	5.58929e-05
ZS	0.00796918	0.0080939	0.00786876	0.00812437	0.00805146	0.00754216	0.00786217	0.0078101	0.00771421	0.00791615	0.00791793	0.00778134		ZS	0.0654579	0.134897	0.222199	0.0552849	0.0601746	-0.0444743	0.061103	0.0195884	-0.00299295	0.0316892	5.58929e-05	0
Dxy_3L	CO	ED	FR	GA	GU	KR	NG	RG	TZ	UG	ZI	ZS		Fst_3L	CO	ED	FR	GA	GU	KR	NG	RG	TZ	UG	ZI	ZS
CO	0.00795606	0.00853528	0.00834598	0.008412	0.00822736	0.0082593	0.00815941	0.00840806	0.00867617	0.00842161	0.00896892	0.00863644		CO	0	0.123593	0.158946	0.0192752	0.0226427	0.0483842	0.0363416	0.0419844	0.0985452	0.0312319	0.060049	0.0697866
ED	0.00853528	0.0070279	0.00845586	0.00873701	0.00858628	0.00836889	0.00852361	0.00851307	0.00871322	0.00854016	0.00899243	0.00869821		ED	0.123593	0	0.225295	0.110034	0.118697	0.114192	0.133038	0.109049	0.1584	0.0999591	0.11429	0.130061
FR	0.00834598	0.00845586	0.00609352	0.00841138	0.00840645	0.00809672	0.008287	0.0084478	0.00860744	0.00843243	0.00879113	0.00852369		FR	0.158946	0.225295	0	0.129271	0.153878	0.134677	0.163646	0.156902	0.200266	0.143266	0.14626	0.165817
GA	0.008412	0.00873701	0.00841138	0.00854728	0.0085091	0.00843048	0.00843648	0.00861134	0.00882323	0.00861566	0.00910028	0.00879252		GA	0.0192752	0.110034	0.129271	0	0.0206785	0.0337965	0.0333646	0.0305386	0.0811994	0.0194121	0.0411025	0.0526224
GU	0.00822736	0.00858628	0.00840645	0.0085091	0.00813526	0.00834041	0.00820381	0.00848111	0.00875381	0.00848458	0.00903239	0.00871427		GU	0.0226427	0.118697	0.153878	0.0206785	0	0.0481416	0.031112	0.0401789	0.0965046	0.0286444	0.0568323	0.0681779
KR	0.0082593	0.00836889	0.00809672	0.00843048	0.00834041	0.00793597	0.00826605	0.00815876	0.00817361	0.0082364	0.00853539	0.00814606		KR	0.0483842	0.114192	0.134677	0.0337965	0.0481416	0	0.058993	0.0247784	0.0582485	0.020605	0.0228988	0.0238454
NG	0.00815941	0.00852361	0.008287	0.00843648	0.00820381	0.00826605	0.00777202	0.00839887	0.00865479	0.00838997	0.00893994	0.00862406		NG	0.0363416	0.133038	0.163646	0.0333646	0.031112	0.058993	0	0.0519012	0.10666	0.0389668	0.0673156	0.0788322
RG	0.00840806	0.00851307	0.0084478	0.00861134	0.00848111	0.00815876	0.00839887	0.00816672	0.00846181	0.00834052	0.00877979	0.00843559		RG	0.0419844	0.109049	0.156902	0.0305386	0.0401789	0.0247784	0.0519012	0	0.0645833	0.00941975	0.0279432	0.0348085
TZ	0.00867617	0.00871322	0.00860744	0.00882323	0.00875381	0.00817361	0.00865479	0.00846181	0.00763878	0.00860241	0.00864288	0.00827427		TZ	0.0985452	0.1584	0.200266	0.0811994	0.0965046	0.0582485	0.10666	0.0645833	0	0.0679496	0.0400073	0.0438006
UG	0.00842161	0.00854016	0.00843243	0.00861566	0.00848458	0.0082364	0.00838997	0.00834052	0.00860241	0.00836121	0.00892211	0.00858917		UG	0.0312319	0.0999591	0.143266	0.0194121	0.0286444	0.020605	0.0389668	0.00941975	0.0679496	0	0.0320527	0.0404922
ZI	0.00896892	0.00899243	0.00879113	0.00910028	0.00903239	0.00853539	0.00893994	0.00877979	0.00864288	0.00892211	0.00891851	0.00852476		ZI	0.060049	0.11429	0.14626	0.0411025	0.0568323	0.0228988	0.0673156	0.0279432	0.0400073	0.0320527	0	0.000409171
ZS	0.00863644	0.00869821	0.00852369	0.00879252	0.00871427	0.00814606	0.00862406	0.00843559	0.00827427	0.00858917	0.00852476	0.00813324		ZS	0.0697866	0.130061	0.165817	0.0526224	0.0681779	0.0238454	0.0788322	0.0348085	0.0438006	0.0404922	0.000409171	0
Dxy_3R	CO	ED	FR	GA	GU	KR	NG	RG	TZ	UG	ZI	ZS		Fst_3R	CO	ED	FR	GA	GU	KR	NG	RG	TZ	UG	ZI	ZS
CO	0.00605142	0.00766453	0.00731016	0.00732288	0.00712059	0.0072304	0.00710177	0.00735104	0.00737271	0.00728386	0.008262	0.00791898		CO	0	0.245279	0.187552	0.0775142	0.0779444	0.104142	0.0880781	0.117109	0.112645	0.1398	0.146519	0.129189
ED	0.00766453	0.00551939	0.00754084	0.00796463	0.00784741	0.00740469	0.0077506	0.00765444	0.00769341	0.00759433	0.0082879	0.00807245		ED	0.245279	0	0.2459	0.183447	0.195844	0.157221	0.197274	0.184939	0.184631	0.207777	0.179681	0.176976
FR	0.00731016	0.00754084	0.00584683	0.00752043	0.00739569	0.00723871	0.00734435	0.00749529	0.00754287	0.00746619	0.0081409	0.00793		FR	0.187552	0.2459	0	0.114446	0.126039	0.115252	0.131876	0.147387	0.143663	0.174083	0.146031	0.143212
GA	0.00732288	0.00796463	0.00752043	0.00747081	0.00743137	0.00756835	0.00723977	0.00759943	0.00780364	0.00764539	0.00848869	0.00820839		GA	0.0775142	0.183447	0.114446	0	0.0202343	0.0508085	0.00629656	0.0519129	0.0718173	0.0869957	0.0851993	0.0729135
GU	0.00712059	0.00784741	0.00739569	0.00743137	0.00708329	0.00746564	0.00719083	0.00752397	0.0075827	0.00751886	0.00841781	0.00811126		GU	0.0779444	0.195844	0.126039	0.0202343	0	0.0617529	0.0265325	0.0681193	0.0695349	0.0970581	0.100253	0.0854257
KR	0.0072304	0.00740469	0.00723871	0.00756835	0.00746564	0.00715444	0.0073657	0.00703677	0.0070269	0.0069783	0.00759973	0.00736551		KR	0.104142	0.157221	0.115252	0.0508085	0.0617529	0	0.0594027	0.0157292	-0.00680486	0.0336588	0.020093	0.00648178
NG	0.00710177	0.0077506	0.00734435	0.00723977	0.00719083	0.0073657	0.00690678	0.00744459	0.00755614	0.00743459	0.00829901	0.00800415		NG	0.0880781	0.197274	0.131876	0.00629656	0.0265325	0.0594027	0	0.0697667	0.0763939	0.0986592	0.0979363	0.0841318
RG	0.00735104	0.00765444	0.00749529	0.00759943	0.00752397	0.00703677	0.00744459	0.00695513	0.00722045	0.00701166	0.00802376	0.00772453		RG	0.117109	0.184939	0.147387	0.0519129	0.0681193	0.0157292	0.0697667	0	0.0339193	0.040837	0.0640955	0.0482174
TZ	0.00737271	0.00769341	0.00754287	0.00780364	0.0075827	0.0070269	0.00755614	0.00722045	0.00701034	0.00724999	0.00787319	0.0075181		TZ	0.112645	0.184631	0.143663	0.0718173	0.0695349	-0.00680486	0.0763939	0.0339193	0	0.0734201	0.0441147	0.0205357
UG	0.00728386	0.00759433	0.00746619	0.00764539	0.00751886	0.0069783	0.00743459	0.00701166	0.00724999	0.00649766	0.00811107	0.00779784		UG	0.1398	0.207777	0.174083	0.0869957	0.0970581	0.0336588	0.0986592	0.040837	0.0734201	0	0.102231	0.0865578
ZI	0.008262	0.0082879	0.0081409	0.00848869	0.00841781	0.00759973	0.00829901	0.00802376	0.00787319	0.00811107	0.00806109	0.00793541		ZI	0.146519	0.179681	0.146031	0.0851993	0.100253	0.020093	0.0979363	0.0640955	0.0441147	0.102231	0	0.00331616
ZS	0.00791898	0.00807245	0.00793	0.00820839	0.00811126	0.00736551	0.00800415	0.00772453	0.0075181	0.00779784	0.00793541	0.00774957		ZS	0.129189	0.176976	0.143212	0.0729135	0.0854257	0.00648178	0.0841318	0.0482174	0.0205357	0.0865578	0.00331616	0
Dxy_AVG	CO	ED	FR	GA	GU	KR	NG	RG	TZ	UG	ZI	ZS		Fst_AVG	CO	ED	FR	GA	GU	KR	NG	RG	TZ	UG	ZI	ZS
CO	0.00702005	0.00780114	0.00764846	0.00759353	0.00744847	0.0075905	0.00737932	0.00769839	0.00780911	0.0076579	0.0084122	0.00811122		CO	0	0.159032	0.22435	0.0353955	0.0314469	0.0765505	0.0476824	0.0555927	0.13837	0.0524493	0.0896524	0.0822361
ED	0.00780114	0.00613594	0.00780621	0.00801381	0.00789543	0.00777943	0.00783499	0.00788572	0.00798886	0.00786205	0.00844804	0.00821876		ED	0.159032	0	0.297486	0.142608	0.143849	0.156067	0.161067	0.134881	0.21401	0.134622	0.146346	0.148565
FR	0.00764846	0.00780621	0.00491495	0.00774079	0.00772277	0.00750988	0.00763846	0.00782631	0.0078251	0.00778896	0.00828164	0.00805073		FR	0.22435	0.297486	0	0.192723	0.205271	0.205123	0.22134	0.207646	0.27439	0.205986	0.20485	0.208214
GA	0.00759353	0.00801381	0.00774079	0.00763323	0.00767704	0.00770269	0.00748776	0.00788938	0.0079286	0.00788665	0.00858253	0.00827495		GA	0.0353955	0.142608	0.192723	0	0.0200485	0.0516489	0.020479	0.0391503	0.113179	0.0405068	0.0716386	0.0631508
GU	0.00744847	0.00789543	0.00772277	0.00767704	0.00741369	0.00769257	0.00743301	0.0078068	0.00789755	0.00778156	0.00851015	0.00821308		GU	0.0314469	0.143849	0.205271	0.0200485	0	0.062822	0.0280579	0.0432642	0.122962	0.0418968	0.0769422	0.0696822
KR	0.0075905	0.00777943	0.00750988	0.00770269	0.00769257	0.00706751	0.00743511	0.00755407	0.00699906	0.00763485	0.0081036	0.00759755		KR	0.0765505	0.156067	0.205123	0.0516489	0.062822	0	0.0548358	0.0374298	0.0366478	0.0474158	0.0529318	0.0153247
NG	0.00737932	0.00783499	0.00763846	0.00748776	0.00743301	0.00743511	0.00702768	0.00772268	0.0077176	0.00771602	0.00843184	0.00808608		NG	0.0476824	0.161067	0.22134	0.020479	0.0280579	0.0548358	0	0.0571518	0.126974	0.0579233	0.0903444	0.0780198
RG	0.00769839	0.00788572	0.00782631	0.00788938	0.0078068	0.00755407	0.00772268	0.00753939	0.00770574	0.00763417	0.00828076	0.00800105		RG	0.0555927	0.134881	0.207646	0.0391503	0.0432642	0.0374298	0.0571518	0	0.091348	0.0153675	0.0427906	0.0361185
TZ	0.00780911	0.00798886	0.0078251	0.0079286	0.00789755	0.00699906	0.0077176	0.00770574	0.0064955	0.00783996	0.00818517	0.0075394		TZ	0.13837	0.21401	0.27439	0.113179	0.122962	0.0366478	0.126974	0.091348	0	0.11012	0.0936415	0.0461128
UG	0.0076579	0.00786205	0.00778896	0.00788665	0.00778156	0.00763485	0.00771602	0.00763417	0.00783996	0.00750369	0.00838247	0.008111		UG	0.0524493	0.134622	0.205986	0.0405068	0.0418968	0.0474158	0.0579233	0.0153675	0.11012	0	0.0570114	0.0516763
ZI	0.0084122	0.00844804	0.00828164	0.00858253	0.00851015	0.0081036	0.00843184	0.00828076	0.00818517	0.00838247	0.00830817	0.00817009		ZI	0.0896524	0.146346	0.20485	0.0716386	0.0769422	0.0529318	0.0903444	0.0427906	0.0936415	0.0570114	0	0.00883362
ZS	0.00811122	0.00821876	0.00805073	0.00827495	0.00821308	0.00759755	0.00808608	0.00800105	0.0075394	0.008111	0.00817009	0.00790125		ZS	0.0822361	0.148565	0.208214	0.0631508	0.0696822	0.0153247	0.0780198	0.0361185	0.0461128	0.0516763	0.00883362	0

## Sheet: SHORT INTRONS
Dxy_X	CO	ED	FR	GA	GU	KR	NG	RG	TZ	UG	ZI	ZS		Fst_X	CO	ED	FR	GA	GU	KR	NG	RG	TZ	UG	ZI	ZS
CO	0.0134215	0.0145516	0.0142385	0.0141397	0.0138892	0.0144954	0.0136934	0.0148872	0.0154387	0.0141966	0.0166723	0.0156807		CO	0	0.128092	0.34375	0.00201887	0.00458656	0.0174587	0.0211841	0.0308099	0.25754	0.0112905	0.0785087	0.0921712
ED	0.0145516	0.0119538	0.0153759	0.0149911	0.0148273	0.015358	0.0145717	0.015369	0.0161399	0.0150277	0.0169508	0.0163353		ED	0.128092	0	0.440024	0.107654	0.117059	0.120431	0.130546	0.108946	0.335266	0.114806	0.136946	0.173472
FR	0.0142385	0.0153759	0.00526652	0.0146347	0.0149002	0.0143292	0.0143276	0.0151146	0.01563	0.0146653	0.0163305	0.0151733		FR	0.34375	0.440024	0	0.314398	0.345782	0.290624	0.349102	0.315168	0.527504	0.320927	0.308909	0.330538
GA	0.0141397	0.0149911	0.0146347	0.0148007	0.0145623	0.0150559	0.0142141	0.0155875	0.0160929	0.0147521	0.0170821	0.0163973		GA	0.00201887	0.107654	0.314398	0	0.00324447	0.00824161	0.00853108	0.0301126	0.244875	0.00178009	0.0602486	0.0897859
GU	0.0138892	0.0148273	0.0149002	0.0145623	0.0142295	0.014959	0.0139252	0.0152521	0.0156	0.0144258	0.016931	0.0159976		GU	0.00458656	0.117059	0.345782	0.00324447	0	0.0209055	0.00846876	0.0275117	0.239322	-0.00100104	0.0687307	0.0848984
KR	0.0144954	0.015358	0.0143292	0.0150559	0.014959	0.015063	0.01451	0.0152242	0.0139033	0.0148678	0.0164815	0.0146516		KR	0.0174587	0.120431	0.290624	0.00824161	0.0209055	0	0.0197069	-0.00164686	0.116512	0.000721086	0.0180441	-0.0276126
NG	0.0136934	0.0145717	0.0143276	0.0142141	0.0139252	0.01451	0.013385	0.0150529	0.0155512	0.0140289	0.0166497	0.0158118		NG	0.0211841	0.130546	0.349102	0.00853108	0.00846876	0.0197069	0	0.0426901	0.264085	0.000773568	0.0783527	0.100849
RG	0.0148872	0.015369	0.0151146	0.0155875	0.0152521	0.0152242	0.0150529	0.0154355	0.0159158	0.0152102	0.0166695	0.0160479		RG	0.0308099	0.108946	0.315168	0.0301126	0.0275117	-0.00164686	0.0426901	0	0.216526	0.0109743	0.0179483	0.0501948
TZ	0.0154387	0.0161399	0.01563	0.0160929	0.0156	0.0139033	0.0155512	0.0159158	0.0095037	0.0156584	0.0172333	0.0130147		TZ	0.25754	0.335266	0.527504	0.244875	0.239322	0.116512	0.264085	0.216526	0	0.228698	0.22218	0.0567192
UG	0.0141966	0.0150277	0.0146653	0.0147521	0.0144258	0.0148678	0.0140289	0.0152102	0.0156584	0.0146511	0.0165986	0.015851		UG	0.0112905	0.114806	0.320927	0.00178009	-0.00100104	0.000721086	0.000773568	0.0109743	0.228698	0	0.0373793	0.0631395
ZI	0.0166723	0.0169508	0.0163305	0.0170821	0.016931	0.0164815	0.0166497	0.0166695	0.0172333	0.0165986	0.0173052	0.0169867		ZI	0.0785087	0.136946	0.308909	0.0602486	0.0687307	0.0180441	0.0783527	0.0179483	0.22218	0.0373793	0	0.047652
ZS	0.0156807	0.0163353	0.0151733	0.0163973	0.0159976	0.0146516	0.0158118	0.0160479	0.0130147	0.015851	0.0169867	0.0150493		ZS	0.0921712	0.173472	0.330538	0.0897859	0.0848984	-0.0276126	0.100849	0.0501948	0.0567192	0.0631395	0.047652	0
Dxy_2L	CO	ED	FR	GA	GU	KR	NG	RG	TZ	UG	ZI	ZS		Fst_2L	CO	ED	FR	GA	GU	KR	NG	RG	TZ	UG	ZI	ZS
CO	0.0180189	0.0194642	0.0192571	0.0189007	0.018371	0.0185597	0.0180739	0.0190575	0.0195026	0.0191525	0.022309	0.020894		CO	0	0.13285	0.218674	0.0379162	0.0141895	0.139154	0.0597948	0.0374463	0.196876	0.0471307	0.0931745	0.0486321
ED	0.0194642	0.0157379	0.0199189	0.0197602	0.0194121	0.0193441	0.0193765	0.0195767	0.0199576	0.0196053	0.0224647	0.0212432		ED	0.13285	0	0.301893	0.137485	0.125811	0.233021	0.181864	0.121232	0.272333	0.12731	0.150229	0.117957
FR	0.0192571	0.0199189	0.0120732	0.0196168	0.0191121	0.0191196	0.0188581	0.0193685	0.0198847	0.0190339	0.0222652	0.0209301		FR	0.218674	0.301893	0	0.224583	0.207964	0.319849	0.256537	0.20639	0.361813	0.197377	0.224912	0.192309
GA	0.0189007	0.0197602	0.0196168	0.0183492	0.0187265	0.0180736	0.0171249	0.0193664	0.0185874	0.0194488	0.0228084	0.0210876		GA	0.0379162	0.137485	0.224583	0	0.0240825	0.106861	-0.00195107	0.0442729	0.148445	0.0531537	0.105791	0.0495344
GU	0.018371	0.0194121	0.0191121	0.0187265	0.0182018	0.0184612	0.0178055	0.0189908	0.0190531	0.0190888	0.0224194	0.0210974		GU	0.0141895	0.125811	0.207964	0.0240825	0	0.129607	0.0404849	0.0292499	0.173127	0.0391563	0.0935595	0.0534673
KR	0.0185597	0.0193441	0.0191196	0.0180736	0.0184612	0.0139352	0.0169143	0.018568	0.0144697	0.0191263	0.0221157	0.0197339		KR	0.139154	0.233021	0.319849	0.106861	0.129607	0	0.116056	0.122038	0.0586387	0.152579	0.177574	0.0961715
NG	0.0180739	0.0193765	0.0188581	0.0171249	0.0178055	0.0169143	0.0159674	0.0186769	0.0172524	0.0188459	0.02203	0.0203538		NG	0.0597948	0.181864	0.256537	-0.00195107	0.0404849	0.116056	0	0.0727495	0.151579	0.0860546	0.128251	0.0737781
RG	0.0190575	0.0195767	0.0193685	0.0193664	0.0189908	0.018568	0.0186769	0.0186689	0.0191299	0.0188228	0.0220821	0.0208408		RG	0.0374463	0.121232	0.20639	0.0442729	0.0292499	0.122038	0.0727495	0	0.164239	0.0131717	0.0691412	0.0306085
TZ	0.0195026	0.0199576	0.0198847	0.0185874	0.0190531	0.0144697	0.0172524	0.0191299	0.0133072	0.0196679	0.0224878	0.019767		TZ	0.196876	0.272333	0.361813	0.148445	0.173127	0.0586387	0.151579	0.164239	0	0.191882	0.205147	0.113572
UG	0.0191525	0.0196053	0.0190339	0.0194488	0.0190888	0.0191263	0.0188459	0.0188228	0.0196679	0.0184808	0.0221548	0.0212286		UG	0.0471307	0.12731	0.197377	0.0531537	0.0391563	0.152579	0.0860546	0.0131717	0.191882	0	0.076437	0.0527443
ZI	0.022309	0.0224647	0.0222652	0.0228084	0.0224194	0.0221157	0.02203	0.0220821	0.0224878	0.0221548	0.0224418	0.0221627		ZI	0.0931745	0.150229	0.224912	0.105791	0.0935595	0.177574	0.128251	0.0691412	0.205147	0.076437	0	0.00330749
ZS	0.020894	0.0212432	0.0209301	0.0210876	0.0210974	0.0197339	0.0203538	0.0208408	0.019767	0.0212286	0.0221627	0.0217369		ZS	0.0486321	0.117957	0.192309	0.0495344	0.0534673	0.0961715	0.0737781	0.0306085	0.113572	0.0527443	0.00330749	0
Dxy_2R	CO	ED	FR	GA	GU	KR	NG	RG	TZ	UG	ZI	ZS		Fst_2R	CO	ED	FR	GA	GU	KR	NG	RG	TZ	UG	ZI	ZS
CO	0.0159999	0.0179207	0.0176561	0.0169198	0.0169952	0.0185228	0.0167674	0.0178358	0.0190617	0.0178576	0.0191965	0.0185623		CO	0	0.137784	0.256339	0.0276761	0.0308618	0.0487958	0.0405178	0.0495485	0.0941079	0.0343992	0.0886872	0.0668438
ED	0.0179207	0.0149032	0.0182336	0.0183013	0.0183151	0.0187185	0.0180359	0.0185021	0.0194591	0.0187123	0.019549	0.0189877		ED	0.137784	0	0.309968	0.131041	0.130643	0.088036	0.138406	0.113417	0.14079	0.107807	0.133172	0.116631
FR	0.0176561	0.0182336	0.0102603	0.0177056	0.018037	0.0188426	0.0181134	0.0180958	0.0186321	0.0182514	0.0187129	0.0183562		FR	0.256339	0.309968	0	0.232915	0.245945	0.217242	0.270253	0.221795	0.227245	0.212471	0.218498	0.212708
GA	0.0169198	0.0183013	0.0177056	0.0169031	0.0174322	0.0192855	0.0172767	0.0181867	0.0194768	0.0183135	0.0194197	0.0190546		GA	0.0276761	0.131041	0.232915	0	0.0292481	0.0629936	0.0426639	0.0430599	0.0902321	0.0337779	0.075909	0.0672537
GU	0.0169952	0.0183151	0.018037	0.0174322	0.0169415	0.0192632	0.0172887	0.0182628	0.0194765	0.0184126	0.0196559	0.0191601		GU	0.0308618	0.130643	0.245945	0.0292481	0	0.0609132	0.0422185	0.0459941	0.0892318	0.0379323	0.0860362	0.0713907
KR	0.0185228	0.0187185	0.0188426	0.0192855	0.0192632	0.0192381	0.0182837	0.0187167	0.0193831	0.0194426	0.0197753	0.0185108		KR	0.0487958	0.088036	0.217242	0.0629936	0.0609132	0	0.0315347	0.00778139	0.0255998	0.0298406	0.0334857	-0.0232204
NG	0.0167674	0.0180359	0.0181134	0.0172767	0.0172887	0.0182837	0.0161761	0.0180965	0.0193356	0.0184005	0.0194136	0.0186427		NG	0.0405178	0.138406	0.270253	0.0426639	0.0422185	0.0315347	0	0.0583774	0.102387	0.058103	0.0943439	0.0661441
RG	0.0178358	0.0185021	0.0180958	0.0181867	0.0182628	0.0187167	0.0180965	0.0179041	0.0188946	0.0182414	0.0191795	0.0185631		RG	0.0495485	0.113417	0.221795	0.0430599	0.0459941	0.00778139	0.0583774	0	0.0357069	0.00251811	0.0382391	0.0155974
TZ	0.0190617	0.0194591	0.0186321	0.0194768	0.0194765	0.0193831	0.0193356	0.0188946	0.0185357	0.0192161	0.0189024	0.0183765		TZ	0.0941079	0.14079	0.227245	0.0902321	0.0892318	0.0255998	0.102387	0.0357069	0	0.036683	0.00743396	-0.0115857
UG	0.0178576	0.0187123	0.0182514	0.0183135	0.0184126	0.0194426	0.0184005	0.0182414	0.0192161	0.0184867	0.0196394	0.0190246		UG	0.0343992	0.107807	0.212471	0.0337779	0.0379323	0.0298406	0.058103	0.00251811	0.036683	0	0.0459281	0.0241627
ZI	0.0191965	0.019549	0.0187129	0.0194197	0.0196559	0.0197753	0.0194136	0.0191795	0.0189024	0.0196394	0.018988	0.0188091		ZI	0.0886872	0.133172	0.218498	0.075909	0.0860362	0.0334857	0.0943439	0.0382391	0.00743396	0.0459281	0	-0.000341507
ZS	0.0185623	0.0189877	0.0183562	0.0190546	0.0191601	0.0185108	0.0186427	0.0185631	0.0183765	0.0190246	0.0188091	0.0186431		ZS	0.0668438	0.116631	0.212708	0.0672537	0.0713907	-0.0232204	0.0661441	0.0155974	-0.0115857	0.0241627	-0.000341507	0
Dxy_3L	CO	ED	FR	GA	GU	KR	NG	RG	TZ	UG	ZI	ZS		Fst_3L	CO	ED	FR	GA	GU	KR	NG	RG	TZ	UG	ZI	ZS
CO	0.0170394	0.0181312	0.0179842	0.0177309	0.0175171	0.0179513	0.0174458	0.0178737	0.0188074	0.0180313	0.0197131	0.0181926		CO	0	0.146315	0.181564	0.0177782	0.0261835	0.0304225	0.0344143	0.0420534	0.115221	0.0397886	0.0667833	0.0678398
ED	0.0181312	0.0139173	0.0181287	0.0186265	0.018056	0.0181071	0.0181991	0.0180474	0.018849	0.0180645	0.0196941	0.018563		ED	0.146315	0	0.274196	0.148812	0.141705	0.124979	0.160157	0.137773	0.199991	0.127968	0.145148	0.170532
FR	0.0179842	0.0181287	0.0123985	0.017782	0.0177309	0.0177719	0.0176862	0.0177958	0.0182014	0.0174951	0.0193132	0.0178452		FR	0.181564	0.274196	0	0.151092	0.168795	0.151205	0.178738	0.168254	0.213248	0.142992	0.167608	0.179721
GA	0.0177309	0.0186265	0.017782	0.0177921	0.0177735	0.0181698	0.0180606	0.0180718	0.0191688	0.0182592	0.019582	0.0185214		GA	0.0177782	0.148812	0.151092	0	0.0190568	0.0213703	0.0464448	0.0317302	0.11227	0.0311592	0.0413192	0.0640655
GU	0.0175171	0.018056	0.0177309	0.0177735	0.0170775	0.018054	0.0173668	0.0177258	0.0184537	0.0176657	0.0197168	0.0183048		GU	0.0261835	0.141705	0.168795	0.0190568	0	0.0348811	0.0289232	0.0329854	0.097232	0.0188361	0.0659938	0.0725113
KR	0.0179513	0.0181071	0.0177719	0.0181698	0.018054	0.017771	0.0178487	0.0176775	0.0178596	0.0174316	0.0190602	0.0177004		KR	0.0304225	0.124979	0.151205	0.0213703	0.0348811	0	0.0357155	0.0107307	0.0477829	-0.014235	0.0156259	0.0212495
NG	0.0174458	0.0181991	0.0176862	0.0180606	0.0173668	0.0178487	0.0166515	0.0177894	0.0187618	0.0176085	0.0195787	0.0182811		NG	0.0344143	0.160157	0.178738	0.0464448	0.0289232	0.0357155	0	0.0484181	0.123405	0.0277455	0.0702851	0.0829574
RG	0.0178737	0.0180474	0.0177958	0.0180718	0.0177258	0.0176775	0.0177894	0.0172047	0.0181577	0.0175696	0.0190806	0.0177415		RG	0.0420534	0.137773	0.168254	0.0317302	0.0329854	0.0107307	0.0484181	0	0.0790117	0.00985027	0.031518	0.0394795
TZ	0.0188074	0.018849	0.0182014	0.0191688	0.0184537	0.0178596	0.0187618	0.0181577	0.0162414	0.0182235	0.018879	0.0174139		TZ	0.115221	0.199991	0.213248	0.11227	0.097232	0.0477829	0.123405	0.0790117	0	0.0718098	0.0466879	0.0490677
UG	0.0180313	0.0180645	0.0174951	0.0182592	0.0176657	0.0174316	0.0176085	0.0175696	0.0182235	0.0175884	0.0193855	0.0176049		UG	0.0397886	0.127968	0.142992	0.0311592	0.0188361	-0.014235	0.0277455	0.00985027	0.0718098	0	0.036852	0.0211242
ZI	0.0197131	0.0196941	0.0193132	0.019582	0.0197168	0.0190602	0.0195787	0.0190806	0.018879	0.0193855	0.0197537	0.0183355		ZI	0.0667833	0.145148	0.167608	0.0413192	0.0659938	0.0156259	0.0702851	0.031518	0.0466879	0.036852	0	0.00108395
ZS	0.0181926	0.018563	0.0178452	0.0185214	0.0183048	0.0177004	0.0182811	0.0177415	0.0174139	0.0176049	0.0183355	0.0168775		ZS	0.0678398	0.170532	0.179721	0.0640655	0.0725113	0.0212495	0.0829574	0.0394795	0.0490677	0.0211242	0.00108395	0
Dxy_3R	CO	ED	FR	GA	GU	KR	NG	RG	TZ	UG	ZI	ZS		Fst_3R	CO	ED	FR	GA	GU	KR	NG	RG	TZ	UG	ZI	ZS
CO	0.0130436	0.0172258	0.015852	0.0156049	0.0152435	0.0172075	0.015926	0.0163184	0.016717	0.0158911	0.0184413	0.0177524		CO	0	0.261514	0.195801	0.0665004	0.0708139	0.0697777	0.0956929	0.124994	0.113577	0.154925	0.142585	0.131986
ED	0.0172258	0.0123984	0.0169472	0.0176121	0.0173503	0.0177896	0.0178546	0.0171941	0.0177322	0.0167724	0.0190181	0.0183683		ED	0.261514	0	0.266805	0.191201	0.202236	0.118346	0.211439	0.18832	0.182518	0.218559	0.185552	0.178653
FR	0.015852	0.0169472	0.0124528	0.0160822	0.0158938	0.0168052	0.0164707	0.0164379	0.0170694	0.0162208	0.0183562	0.0178956		FR	0.195801	0.266805	0	0.11257	0.12742	0.0650846	0.143534	0.149324	0.149185	0.19031	0.154706	0.155442
GA	0.0156049	0.0176121	0.0160822	0.0160908	0.0158859	0.0179438	0.015912	0.0166558	0.0174908	0.0165988	0.0187347	0.0182139		GA	0.0665004	0.191201	0.11257	0	0.0124829	0.02304	-0.000852334	0.0512414	0.065687	0.0991641	0.07469	0.070333
GU	0.0152435	0.0173503	0.0158938	0.0158859	0.0152845	0.0174228	0.0158459	0.0163913	0.017057	0.016061	0.018675	0.0181407		GU	0.0708139	0.202236	0.12742	0.0124829	0	0.016966	0.0204124	0.0605275	0.0655603	0.0941004	0.0933188	0.088802
KR	0.0172075	0.0177896	0.0168052	0.0179438	0.0174228	0.01897	0.018188	0.017006	0.0172998	0.0165959	0.0184762	0.0178583		KR	0.0697777	0.118346	0.0650846	0.02304	0.016966	0	0.045237	-0.0138712	-0.0278501	0.0122592	-0.0161754	-0.0287942
NG	0.015926	0.0178546	0.0164707	0.015912	0.0158459	0.018188	0.0157604	0.0168153	0.0176684	0.0167653	0.019187	0.018276		NG	0.0956929	0.211439	0.143534	-0.000852334	0.0204124	0.045237	0	0.0700653	0.0844239	0.117966	0.105111	0.0825283
RG	0.0163184	0.0171941	0.0164379	0.0166558	0.0163913	0.017006	0.0168153	0.0155138	0.0164409	0.0153634	0.0181123	0.0174159		RG	0.124994	0.18832	0.149324	0.0512414	0.0605275	-0.0138712	0.0700653	0	0.0235657	0.0455015	0.0588223	0.0442983
TZ	0.016717	0.0177322	0.0170694	0.0174908	0.017057	0.0172998	0.0176684	0.0164409	0.0165931	0.0164367	0.0180979	0.0174327		TZ	0.113577	0.182518	0.149185	0.065687	0.0655603	-0.0278501	0.0844239	0.0235657	0	0.0750024	0.0282577	0.0142657
UG	0.0158911	0.0167724	0.0162208	0.0165988	0.016061	0.0165959	0.0167653	0.0153634	0.0164367	0.0138148	0.0178222	0.0173869		UG	0.154925	0.218559	0.19031	0.0991641	0.0941004	0.0122592	0.117966	0.0455015	0.0750024	0	0.0911657	0.0915606
ZI	0.0184413	0.0190181	0.0183562	0.0187347	0.018675	0.0184762	0.019187	0.0181123	0.0180979	0.0178222	0.01858	0.0181372		ZI	0.142585	0.185552	0.154706	0.07469	0.0933188	-0.0161754	0.105111	0.0588223	0.0282577	0.0911657	0	-0.00222057
ZS	0.0177524	0.0183683	0.0178956	0.0182139	0.0181407	0.0178583	0.018276	0.0174159	0.0174327	0.0173869	0.0181372	0.017775		ZS	0.131986	0.178653	0.155442	0.070333	0.088802	-0.0287942	0.0825283	0.0442983	0.0142657	0.0915606	-0.00222057	0
Dxy_AVG	CO	ED	FR	GA	GU	KR	NG	RG	TZ	UG	ZI	ZS		Fst_AVG	CO	ED	FR	GA	GU	KR	NG	RG	TZ	UG	ZI	ZS
CO	0.0155047	0.0174587	0.0169976	0.0166592	0.0164032	0.0173473	0.0163813	0.0171945	0.0179055	0.0170258	0.0192664	0.0182164		CO	0	0.161311	0.239225	0.030378	0.0293271	0.0611216	0.0503208	0.0569705	0.155464	0.0575068	0.0939478	0.0814946
ED	0.0174587	0.0137821	0.0177209	0.0178582	0.0175922	0.0178635	0.0176075	0.0177379	0.0184275	0.0176364	0.0195353	0.0186995		ED	0.161311	0	0.318577	0.143238	0.143491	0.136963	0.164483	0.133938	0.22618	0.13929	0.150209	0.151449
FR	0.0169976	0.0177209	0.0104903	0.0171643	0.0171348	0.0173737	0.0170912	0.0173625	0.0178835	0.0171333	0.0189956	0.0180401		FR	0.239225	0.318577	0	0.207112	0.219181	0.208801	0.239633	0.212186	0.295799	0.212815	0.214926	0.214144
GA	0.0166592	0.0178582	0.0171643	0.0167872	0.0168761	0.0177057	0.0165177	0.0175736	0.0181634	0.0174745	0.0195254	0.0186549		GA	0.030378	0.143238	0.207112	0	0.0176229	0.0445014	0.0189673	0.0400834	0.132302	0.043807	0.0715916	0.0681945
GU	0.0164032	0.0175922	0.0171348	0.0168761	0.016347	0.017632	0.0164464	0.0173245	0.0179281	0.0171308	0.0194796	0.0185401		GU	0.0293271	0.143491	0.219181	0.0176229	0	0.0526545	0.0281016	0.0392537	0.132895	0.0378048	0.0815278	0.0742139
KR	0.0173473	0.0178635	0.0173737	0.0177057	0.017632	0.0169955	0.0171489	0.0174385	0.0165831	0.0174928	0.0191818	0.017691		KR	0.0611216	0.136963	0.208801	0.0445014	0.0526545	0	0.0496501	0.0250064	0.0441367	0.0362331	0.0457109	0.00755874
NG	0.0163813	0.0176075	0.0170912	0.0165177	0.0164464	0.0171489	0.0155881	0.0172862	0.0177139	0.0171298	0.0193718	0.0182731		NG	0.0503208	0.164483	0.239633	0.0189673	0.0281016	0.0496501	0	0.0584601	0.145176	0.0581285	0.0952687	0.0812515
RG	0.0171945	0.0177379	0.0173625	0.0175736	0.0173245	0.0174385	0.0172862	0.0169454	0.0177078	0.0170415	0.0190248	0.0181219		RG	0.0569705	0.133938	0.212186	0.0400834	0.0392537	0.0250064	0.0584601	0	0.10381	0.0164032	0.0431338	0.0360357
TZ	0.0179055	0.0184275	0.0178835	0.0181634	0.0179281	0.0165831	0.0177139	0.0177078	0.0148362	0.0178406	0.0191201	0.017201		TZ	0.155464	0.22618	0.295799	0.132302	0.132895	0.0441367	0.145176	0.10381	0	0.120815	0.101941	0.0444077
UG	0.0170258	0.0176364	0.0171333	0.0174745	0.0171308	0.0174928	0.0171298	0.0170415	0.0178406	0.0166044	0.0191201	0.0182192		UG	0.0575068	0.13929	0.212815	0.043807	0.0378048	0.0362331	0.0581285	0.0164032	0.120815	0	0.0575524	0.0505463
ZI	0.0192664	0.0195353	0.0189956	0.0195254	0.0194796	0.0191818	0.0193718	0.0190248	0.0191201	0.0191201	0.0194138	0.0188863		ZI	0.0939478	0.150209	0.214926	0.0715916	0.0815278	0.0457109	0.0952687	0.0431338	0.101941	0.0575524	0	0.00989628
ZS	0.0182164	0.0186995	0.0180401	0.0186549	0.0185401	0.017691	0.0182731	0.0181219	0.017201	0.0182192	0.0188863	0.0180164		ZS	0.0814946	0.151449	0.214144	0.0681945	0.0742139	0.00755874	0.0812515	0.0360357	0.0444077	0.0505463	0.00989628	0
